# Supplementary material for: Comparative Transcriptome Analysis of Fetal Skin Reveals Key Genes Related to Hair Follicle Morphogenesis in Cashmere Goats
Source: PLoS One. 2016 Mar 9;11(3):e0151118. doi: 10.1371/journal.pone.0151118 (PMC4784850; doi:10.1371/journal.pone.0151118)
Supplement: S2 Table — (XLSX) [file pone.0151118.s008.xlsx]

## Sheet: S2 Table
S2 Table. Summary of read numbers based on the RNA-Seq data from cashmere goat HF development.
	E60_1	E60_2	E60_3	E120_1	E120_2	E120_3	NB_1	NB_2	NB_3
Total Reads	20889492	31147806	24200788	20869460	24134940	22716278	20911558	20607806	30800058
Mapped Reads	13569473	19501066	15647664	13751852	15206951	14164309	13701095	12834449	19501591
	0.6496	0.6261	0.6466	0.6589	0.6301	0.6235	0.6552	0.6228	0.6332
Unique match	10522691	14624144	12085524	10871074	11721624	11048178	10958474	9657209	14959554
	0.5037	0.4695	0.4994	0.5209	0.4857	0.4864	0.524	0.4686	0.4857
Multi-position match	3046782	4876922	3562140	2880778	3485327	3116131	2742621	3177240	4542037
	0.1459	0.1566	0.1472	0.138	0.1444	0.1372	0.1312	0.1542	0.1475
Unmapped Reads	7320019	11646740	8553124	7117608	8927989	8551969	7210463	7773357	11298467
	0.3504	0.3739	0.3534	0.3411	0.3699	0.3765	0.3448	0.3772	0.3668
