# Supplementary material for: Comparative Transcriptome Analysis of Fetal Skin Reveals Key Genes Related to Hair Follicle Morphogenesis in Cashmere Goats
Source: PLoS One. 2016 Mar 9;11(3):e0151118. doi: 10.1371/journal.pone.0151118 (PMC4784850; doi:10.1371/journal.pone.0151118)
Supplement: S3 Table — (XLSX) [file pone.0151118.s009.xlsx]

## Sheet: S3 Table
S3 Table. Gene with different expression in E60 vs. E120 and E60 vs. NB
GeneID	Gene_Symbol	Gene Expression (RPKM)									log2 Fold Change		P value		FDR		Gene_description
		E60_1	E60_2	E60_3	E120_1	E120_2	E120_3	NB_1	NB_2	NB_3	E120/E60	NB/E60	E120/E60	NB/E60	E120/E60	NB/E60
XR_311215.1	LOC102168611	0.0599009	0.0862024	0.0782322	0.666784	0.53774	0.599044	-	-	-	3.00712	-	0.000158594	-	0.0174374	-	uncharacterized LOC102168611%2C transcript variant X1
XR_311161.1	LOC102190019	7.28149	11.4191	13.2487	-	-	-	1.25496	1.6275	1.77295	-	-2.7788	-	0.00681474	-	0.0461215	uncharacterized LOC102190019
XR_311118.1	LOC102174900	134.549	114.308	129.99	-	-	-	48.1145	61.6706	56.5135	-	-1.18784	-	0.000628476	-	0.0158981	uncharacterized LOC102174900
XR_311101.1	LOC102190928	12.9882	10.456	9.8531	-	-	-	1.11134	1.12097	0.723647	-	-3.49371	-	0.000476725	-	0.0139735	uncharacterized LOC102190928
XR_311091.1	LOC102176489	17.7703	17.512	20.8541	-	-	-	41.1754	45.8817	41.032	-	1.19014	-	0.000236782	-	0.0112217	uncharacterized LOC102176489
XR_311070.1	LOC102187550	8.02387	8.8407	6.11299	0.485421	0.450197	0.716459	-	-	-	-3.79787	-	0.000940916	-	0.0288481	-	uncharacterized LOC102187550
XR_311032.1	LOC102172019	4.51622	4.7707	4.85251	2.65079	1.89775	1.69311	2.07604	2.40813	1.14904	-1.17972	-1.32769	0.00103207	0.00190357	0.0297408	0.0250962	uncharacterized LOC102172019
XR_311002.1	LOC102178315	78.061	55.5851	92.6211	-	-	-	241.34	281.07	282.302	-	1.83045	-	0.000363442	-	0.0126865	heat shock 70 kDa protein 1B-like
XR_310936.1	LOC102168308	0.302267	0.304491	0.263179	0.117032	0.10854	0.057578	-	-	-	-1.61935	-	0.00103213	-	0.0297408	-	uncharacterized LOC102168308%2C transcript variant X3
XR_310924.1	LOC102168212	4.4954	5.43418	4.38377	0.957294	0.161424	0.171263	-	-	-	-3.47194	-	0.000516807	-	0.0235671	-	uncharacterized LOC102168212
XR_310880.1	LOC102177378	38.7856	48.0869	33.8162	14.8532	14.3929	13.8423	11.2119	12.5497	11.9104	-1.48592	-1.75843	0.00350455	0.00251552	0.0446512	0.0281595	triple functional domain protein-like
XR_310868.1	LOC102169134	74.4835	67.2093	56.5091	22.2239	35.38	26.5741	27.1967	29.2854	37.2172	-1.23545	-1.08086	0.00426146	0.00450497	0.0483633	0.0370757	tubulin%2C alpha 1a pseudogene
XR_310808.1	LOC102176726	2.42585	1.70187	3.85468	-	-	-	4892.46	3321.19	5951.93	-	10.7933	-	0.00349279	-	0.0331223	keratin%2C type I microfibrillar 48 kDa%2C component 8C-1-like
XR_310804.1	LOC102172095	0.584457	3.0279	4.37635	-	-	-	7092.64	3915.52	7138.81	-	11.1495	-	0.00477954	-	0.0382704	uncharacterized LOC102172095
XR_310797.1	LOC102189707	5.56868	5.71476	7.47157	-	-	-	2.19149	2.38731	1.47693	-	-1.6309	-	0.00322966	-	0.0320241	uncharacterized LOC102189707
XR_310780.1	PHF12	0.329403	0.474039	0.45889	0.0637693	0.0887131	0.0313735	-	-	-	-2.77944	-	0.0018101	-	0.0353914	-	PHD finger protein 12%2C transcript variant X2
XR_310765.1	LOC102188078	18.1401	24.5857	22.9608	7.96699	10.5972	8.9739	-	-	-	-1.25417	-	0.0036342	-	0.0451863	-	uncharacterized LOC102188078
XR_310732.1	LOC102171269	0.13602	0.195744	0.315815	-	-	-	0.783666	1.23509	1.33949	-	2.37458	-	0.00717993	-	0.0472834	uncharacterized LOC102171269%2C transcript variant X2
XR_310727.1	LOC102187074	3.9792	3.76147	3.66844	1.13285	0.350215	0.29725	1.12381	1.27524	1.48183	-2.67998	-1.55573	0.000356145	5.49e-05	0.0213835	0.00701209	uncharacterized LOC102187074
XR_310722.1	KRTDAP	28.9597	13.7569	30.6005	-	-	-	110.422	98.9542	88.4041	-	2.02203	-	0.000845261	-	0.0179866	keratinocyte differentiation-associated protein%2C transcript variant X2
XR_310721.1	DMKN	0.0911585	0.0655924	0.0396852	0.397067	0.654676	0.520936	1.0504	1.04295	1.12213	3.00109	4.0329	0.00377105	4.28e-06	0.0459491	0.00357058	dermokine%2C transcript variant X5
XR_310667.1	LOC102190448	4.67374	1.68148	3.05202	-	-	-	9.72374	13.1559	12.0544	-	1.89279	-	0.00307336	-	0.0312003	uncharacterized LOC102190448
XR_310663.1	LOC102181329	0.765878	1.65325	0.833549	-	-	-	5.27052	5.4939	5.70152	-	2.33979	-	0.000144598	-	0.00956479	uncharacterized LOC102181329
XR_310616.1	LOC102168845	0.533363	0.496653	1.25659	-	-	-	1.95823	2.52977	2.38345	-	1.58741	-	0.00709357	-	0.0470037	uncharacterized LOC102168845
XR_310520.1	LOC102186609	0.910551	1.03449	0.667624	-	-	-	0.0920359	0.313312	0.16855	-	-2.18666	-	0.00567982	-	0.0417119	uncharacterized LOC102186609
XR_310507.1	LOC102189880	9.65412	7.81487	9.98177	3.50428	4.60416	4.88481	3.76602	4.27348	1.90991	-1.07908	-1.46416	0.00374138	0.00407608	0.0458235	0.0354333	uncharacterized LOC102189880%2C transcript variant X2
XR_310506.1	LOC102189880	209.041	210.205	241.036	77.4707	103.721	85.8486	72.5914	61.3627	56.4054	-1.30602	-1.79436	0.000548512	0.000169282	0.0240885	0.010038	uncharacterized LOC102189880%2C transcript variant X1
XR_310487.1	LOC102191349	8.53287	9.99216	8.59485	-	-	-	2.08855	4.73995	4.11909	-	-1.30874	-	0.00443323	-	0.0368204	uncharacterized LOC102191349
XR_310430.1	LOC102174669	3.94636	4.60472	3.52891	-	-	-	17.1036	12.319	19.6564	-	2.02249	-	0.00475705	-	0.0381749	uncharacterized LOC102174669
XR_310393.1	LOC102185662	1.73352	1.91899	1.19974	4.13039	3.51146	3.93717	5.29254	7.99143	6.50335	1.25478	2.02785	0.00136738	0.0035494	0.0314837	0.0333126	uncharacterized LOC102185662%2C transcript variant X1
XR_310366.1	LOC102191340	32.6675	32.7655	32.3833	13.141	16.25	15.6242	11.4067	14.9469	18.0049	-1.11966	-1.14086	5.13e-05	0.000734618	0.0136381	0.0171919	uncharacterized LOC102191340
XR_310307.1	LOC102186399	0.105241	0.227176	0.274896	2.54671	1.98401	1.50353	-	-	-	3.31266	-	0.00408217	-	0.0478245	-	uncharacterized LOC102186399
XR_310284.1	LOC102171425	5.19381	8.18137	4.88884	-	-	-	12.5356	14.0717	11.3551	-	1.05557	-	0.00746937	-	0.048204	uncharacterized LOC102171425
XR_310235.1	CHRNA2	0.345888	0.1037	0.476836	-	-	-	3.04455	2.44976	3.42649	-	3.26743	-	0.000939316	-	0.0187757	cholinergic receptor%2C nicotinic%2C alpha 2 %28neuronal%29%2C transcript variant X2
XR_310106.1	LOC102171230	4.4836	4.34827	5.51624	-	-	-	0.374374	2.12409	1.2341	-	-1.94262	-	0.00481076	-	0.0383454	uncharacterized LOC102171230
XR_310105.1	LOC102189570	1.29296	1.86068	3.65873	-	-	-	7.13889	7.04419	7.50322	-	1.67055	-	0.0024126	-	0.0277989	uncharacterized LOC102189570
XR_310102.1	LOC102177046	0.573638	0.9631	0.499458	3.33153	2.57482	2.73177	2.38691	2.91689	2.82452	2.08484	1.99708	0.00126363	0.000735193	0.0309825	0.0171919	uncharacterized LOC102177046
XR_309998.1	LOC102190935	4.76565	5.14363	4.23075	1.62809	1.88744	1.73549	1.07674	1.57819	1.18313	-1.42911	-1.88134	0.000422546	0.000357322	0.022363	0.0125649	natural resistance-associated macrophage protein 2-like
XR_309968.1	LOC102179348	0.215494	0.155057	0.750509	-	-	-	2.48309	1.87845	2.2737	-	2.56529	-	0.00209071	-	0.0263157	uncharacterized LOC102179348
XR_309933.1	LOC102180720	0.129472	0.155268	0.150306	0.459518	0.503661	0.452152	0.497295	0.611328	0.516075	1.7019	1.90093	5.32e-05	0.000393377	0.0136381	0.0129952	uncharacterized LOC102180720
XR_309924.1	LOC102188465	1.99439	0.861029	0.781419	-	-	-	3.15988	3.25969	3.71761	-	1.4789	-	0.00715044	-	0.0471455	POU domain%2C class 3%2C transcription factor 3-like
XR_309917.1	LOC102174620	5.19181	0.487269	6.09276	20.9757	18.8457	27.9493	21.0252	20.1688	18.7362	2.52532	2.34794	0.00456652	0.000994667	0.0494479	0.0192837	uncharacterized LOC102174620
XR_309903.1	LOC102188010	17.3264	23.8008	21.4859	7.62325	8.01277	4.50063	-	-	-	-1.63664	-	0.00297892	-	0.0422862	-	uncharacterized LOC102188010
XR_309896.1	LOC102188008	3.30306	2.89212	1.87109	-	-	-	0.305707	0.3469	0.279928	-	-3.11267	-	0.00505703	-	0.0393134	uncharacterized LOC102188008
XR_309855.1	LOC102184485	1.37231	0.987438	1.34421	0.498126	0.307987	0.490141	-	-	-	-1.51472	-	0.00441674	-	0.0490334	-	uncharacterized LOC102184485
XR_309804.1	LOC102172108	0.593542	0.379626	1.60779	-	-	-	4.55951	5.10203	6.95839	-	2.68694	-	0.00464347	-	0.0376903	uncharacterized LOC102172108
XM_005709772.1	LRFN4	3.53703	3.26534	4.4742	-	-	-	1.60206	1.30891	2.01855	-	-1.19381	-	0.00730069	-	0.0476305	leucine rich repeat and fibronectin type III domain containing 4
XM_005709766.1	CACNA1A	0.751313	0.913016	0.63962	-	-	-	0.0961914	0.109153	0.0587201	-	-3.12515	-	0.00109098	-	0.0197969	calcium channel%2C voltage-dependent%2C P%2FQ type%2C alpha 1A subunit
XM_005709762.1	PPFIA1	15.0739	16.981	16.97	-	-	-	29.6496	37.9968	35.8615	-	1.07815	-	0.00215488	-	0.0266383	protein tyrosine phosphatase%2C receptor type%2C f polypeptide %28PTPRF%29%2C interacting protein %28liprin%29%2C alpha 1
XM_005709736.1	DBNDD2	9.09158	6.74749	6.72105	30.9945	27.9242	41.2263	38.1047	41.1208	50.5173	2.15024	2.52381	0.00322195	0.000727324	0.0435005	0.0171508	dysbindin %28dystrobrevin binding protein 1%29 domain containing 2
XM_005709732.1	CHRNB4	1.47566	1.80506	1.73453	-	-	-	0.991887	0.482374	0.570898	-	-1.29411	-	0.0060365	-	0.0430761	cholinergic receptor%2C nicotinic%2C beta 4 %28neuronal%29
XM_005709730.1	RASSF1	49.0163	42.733	45.7326	16.2909	25.8813	21.3085	18.5046	20.5548	23.8202	-1.11485	-1.12858	0.001734	0.000477943	0.0344173	0.0139735	Ras association %28RalGDS%2FAF-6%29 domain family member 1
XM_005709717.1	GRIN3B	0.159117	0.372097	0.173176	1.6942	1.57126	1.85648	1.14592	1.64708	1.39906	2.86224	2.57321	0.000164399	0.00191406	0.0174374	0.0251971	glutamate receptor%2C ionotropic%2C N-methyl-D-aspartate 3B
XM_005709706.1	SORCS2	68.4052	57.6441	49.5948	12.157	8.09555	5.40327	5.79388	6.03861	5.55904	-2.77529	-3.3362	0.00099023	0.000637861	0.0293648	0.0159151	sortilin-related VPS10 domain containing receptor 2
XM_005709702.1	TACSTD2	95.6276	25.5756	89.995	-	-	-	536.954	486.959	556.953	-	2.90404	-	0.00011799	-	0.0089352	tumor-associated calcium signal transducer 2
XM_005709699.1	SIPA1	43.2767	32.0077	34.6705	-	-	-	9.0502	12.9348	11.837	-	-1.70088	-	0.00211682	-	0.0263849	signal-induced proliferation-associated 1
XM_005709697.1	HN1	86.6693	105.233	73.7862	25.146	36.2113	33.0611	29.9204	31.5326	37.6404	-1.49259	-1.42287	0.0041699	0.00414967	0.0482239	0.035752	hematological and neurological expressed 1
XM_005709690.1	CHST2	18.4856	25.6882	27.2125	-	-	-	6.09984	7.19863	9.60701	-	-1.63996	-	0.00497819	-	0.0390215	carbohydrate %28N-acetylglucosamine-6-O%29 sulfotransferase 2
XM_005709684.1	DLGAP3	1.50052	1.96306	1.66279	0.484143	0.285735	0.303152	0.65493	0.594543	0.927541	-2.25625	-1.23559	0.000832699	0.00442774	0.0278403	0.0368204	discs%2C large %28Drosophila%29 homolog-associated protein 3
XM_005709683.1	SHC2	34.6614	34.8267	41.3718	14.9114	20.417	17.2004	15.792	11.285	11.8245	-1.07756	-1.51084	0.002044	0.000798598	0.0377132	0.0175466	SHC %28Src homology 2 domain containing%29 transforming protein 2
XM_005709681.1	AHDC1	25.3464	26.6734	24.2642	-	-	-	11.0687	14.7367	12.2775	-	-1.00224	-	0.000581287	-	0.0153459	AT hook%2C DNA binding motif%2C containing 1
XM_005709679.1	UCP2	8.6637	5.46269	10.0319	-	-	-	25.6436	19.1722	21.8006	-	1.46336	-	0.00363036	-	0.0335473	uncoupling protein 2 %28mitochondrial%2C proton carrier%29
XM_005709671.1	SQRDL	3.00039	2.55544	3.25217	15.7659	14.8967	13.122	28.7519	31.8922	37.6014	2.31354	3.47951	0.000131633	0.000329306	0.0162729	0.0124319	sulfide quinone reductase-like %28yeast%29
XM_005709655.1	GATA3	7.81856	3.77285	7.9691	-	-	-	44.4202	50.1352	61.7619	-	2.99846	-	0.000992581	-	0.0192804	GATA binding protein 3
XM_005709650.1	C21H15orf39	22.0983	16.4054	22.9056	-	-	-	9.35872	11.0839	8.23029	-	-1.09877	-	0.00779718	-	0.0492151	chromosome 21 open reading frame%2C human C15orf39
XM_005709637.1	VGLL3	21.2974	31.9794	25.6074	6.29417	3.29361	2.58526	2.00494	7.70284	3.67175	-2.69605	-2.55971	0.0025401	0.00348531	0.0402786	0.0330836	vestigial like 3 %28Drosophila%29
XM_005709629.1	LRRC24	1.86281	1.93609	2.29128	4.15002	4.06123	4.75938	-	-	-	1.09069	-	0.000861722	-	0.0283341	-	leucine rich repeat containing 24
XM_005709623.1	ASPRV1	0.549958	0.356146	0.574608	-	-	-	298.475	178.575	313.422	-	9.06028	-	0.00351941	-	0.033141	aspartic peptidase%2C retroviral-like 1
XM_005709606.1	EPB41L4B	1.03983	1.38951	1.48738	7.63864	8.75127	10.5934	8.93279	8.78088	10.2138	2.78435	2.83397	0.000913825	7.23e-05	0.0285935	0.00801668	erythrocyte membrane protein band 4.1 like 4B
XM_005709596.1	CCDC8	77.5949	94.2442	72.7816	-	-	-	25.1788	32.3504	30.3456	-	-1.47703	-	0.00158125	-	0.0232707	coiled-coil domain containing 8
XM_005709593.1	ARL10	10.62	10.4001	8.68694	-	-	-	5.4647	4.04754	4.60609	-	-1.07324	-	0.00213404	-	0.0265062	ADP-ribosylation factor-like 10
XM_005709591.1	ABHD3	1.03738	1.62269	1.06031	-	-	-	5.15386	5.55344	7.51909	-	2.29251	-	0.00306233	-	0.0311553	abhydrolase domain containing 3
XM_005709589.1	RGS12	16.861	14.595	17.0407	-	-	-	8.11731	7.2337	7.82062	-	-1.06553	-	0.00052318	-	0.0145791	regulator of G-protein signaling 12
XM_005709587.1	AUTS2	17.648	17.7498	17.8278	7.67609	5.07673	4.92186	2.34064	3.96633	3.13202	-1.59044	-2.49542	0.00018793	6.53e-06	0.0182977	0.00369288	autism susceptibility candidate 2
XM_005709579.1	DUSP2	1.04719	1.22444	1.02575	18.4355	27.9087	25.0593	-	-	-	4.4366	-	0.0012698	-	0.0309825	-	dual specificity phosphatase 2
XM_005709566.1	PSAPL1	0.781703	0.281234	0.43754	-	-	-	55.2776	50.8014	36.0549	-	6.56569	-	0.00128081	-	0.021313	prosaposin-like 1
XM_005709560.1	UBE2C	131.651	105.124	150.305	-	-	-	59.0816	45.5998	52.3912	-	-1.3012	-	0.00496973	-	0.0389767	ubiquitin-conjugating enzyme E2C
XM_005709559.1	VCAM1	21.3892	26.44	25.733	4.80728	3.63788	2.23452	1.84321	2.75557	2.33611	-2.7841	-3.40702	0.000275595	0.000156515	0.0199778	0.00985574	vascular cell adhesion molecule 1
XM_005709557.1	DENND1C	0.69165	0.630384	0.682504	3.1689	3.35289	3.6451	4.47191	3.61745	4.05428	2.34254	2.59886	4.13e-05	0.000166345	0.0126548	0.0100317	DENN%2FMADD domain containing 1C
XM_005709553.1	IER2	59.6746	43.9204	57.4668	-	-	-	128.065	129.91	148.878	-	1.33689	-	0.000584463	-	0.0153674	immediate early response 2
XM_005709543.1	P2RY2	1.92686	1.71921	2.61719	4.84929	3.94388	4.99178	4.66259	5.62678	5.52991	1.13811	1.3367	0.00416063	0.00147182	0.0482239	0.0226642	purinergic receptor P2Y%2C G-protein coupled%2C 2
XM_005709542.1	NUAK2	0.532823	0.438158	0.530195	2.98397	3.86075	4.67606	4.16616	3.48345	5.08647	2.94007	3.08476	0.00241374	0.00129577	0.0396901	0.0214856	NUAK family%2C SNF1-like kinase%2C 2
XM_005709539.1	GPSM1	25.2684	23.3764	25.6569	-	-	-	6.64949	9.9536	9.27566	-	-1.52163	-	0.000194338	-	0.0106891	G-protein signaling modulator 1
XM_005709538.1	RHOV	12.2202	4.52452	10.5366	-	-	-	31.2723	26.9539	29.5846	-	1.68648	-	0.00160246	-	0.0234124	ras homolog family member V
XM_005709535.1	SMAD6	2.70514	2.6517	2.38946	6.10971	6.72222	7.65474	5.11984	4.91262	6.01181	1.40311	1.05048	0.000762905	0.00140246	0.0267997	0.0221375	SMAD family member 6
XM_005709532.1	GTSE1	14.2118	13.9188	16.9987	-	-	-	7.06457	6.33498	7.67427	-	-1.09861	-	0.00160817	-	0.0234475	G-2 and S-phase expressed 1
XM_005709519.1	RNF126	17.8601	12.1999	18.6501	-	-	-	33.3148	36.7519	46.2199	-	1.25539	-	0.00667176	-	0.0455016	ring finger protein 126
XM_005709518.1	PCDHGB4	3.98445	5.48248	4.86906	-	-	-	1.34246	2.43736	1.08174	-	-1.56015	-	0.00628647	-	0.0440794	protocadherin gamma subfamily B%2C 4
XM_005709515.1	PCDHGA7	3.41631	4.12546	3.77636	-	-	-	0.912821	1.68321	0.940329	-	-1.6783	-	0.00133477	-	0.0216683	protocadherin gamma subfamily A%2C 7
XM_005709514.1	ELAC2	7.90513	7.01776	8.2535	-	-	-	28.983	22.5594	24.7697	-	1.71925	-	0.000766931	-	0.0175023	elaC ribonuclease Z 2
XM_005709509.1	PCDHGA9	7.53789	7.03259	9.82615	-	-	-	2.61718	3.52667	2.44142	-	-1.50675	-	0.00464975	-	0.0376956	protocadherin gamma subfamily A%2C 9
XM_005709499.1	TBC1D5	10.4335	8.26861	9.05256	-	-	-	5.07937	5.48554	3.25895	-	-1.00557	-	0.0075929	-	0.0485151	TBC1 domain family%2C member 5
XM_005709484.1	RAI1	22.0952	20.0725	23.5929	-	-	-	8.31829	10.5909	6.07534	-	-1.39619	-	0.00119854	-	0.0207649	retinoic acid induced 1
XM_005709481.1	TSPYL5	40.7918	36.1495	33.5813	14.345	19.1246	18.2084	11.8825	10.6577	9.85112	-1.09672	-1.77066	0.0015792	0.000286917	0.033494	0.0118548	TSPY-like 5
XM_005709479.1	TCP11	0.821426	1.04571	0.880251	0.305809	0.283618	0.421269	-	-	-	-1.44271	-	0.00189464	-	0.0365485	-	t-complex 11%2C testis-specific
XM_005709474.1	ADCY8	1.34157	1.55633	1.31112	-	-	-	0.184032	0.268495	0.539243	-	-2.08541	-	0.00124959	-	0.0211619	adenylate cyclase 8 %28brain%29
XM_005709460.1	KIF23	13.1452	18.4601	14.6799	2.428	4.9882	2.81245	2.37814	4.39385	4.1542	-2.17793	-2.08276	0.0024512	0.00228454	0.0396901	0.0273191	kinesin family member 23
XM_005709454.1	ATG9B	0.816369	0.827717	0.3554	15.4809	18.1884	26.0122	-	-	-	4.89958	-	0.00369364	-	0.0455775	-	autophagy related 9B
XM_005709442.1	NUMBL	34.2302	25.0433	34.671	-	-	-	11.5446	11.8485	13.5202	-	-1.34767	-	0.00401646	-	0.035154	numb homolog %28Drosophila%29-like
XM_005709425.1	TTYH2	68.7413	70.3663	54.6641	14.1744	9.73099	8.04771	3.45878	6.05231	5.94353	-2.60033	-3.64825	0.000528773	0.000299703	0.0237955	0.0120323	tweety family member 2
XM_005709413.1	GLRX	36.7503	24.4631	28.0511	-	-	-	85.5017	85.3799	98.6191	-	1.59413	-	0.000461445	-	0.0138389	glutaredoxin %28thioltransferase%29
XM_005709410.1	PCDHA4	0.555497	0.584182	0.372049	-	-	-	0.0410313	0.18624	0.0601141	-	-2.39514	-	0.00715233	-	0.0471455	protocadherin alpha 4
XM_005709409.1	DPP7	7.3351	9.23635	9.01633	-	-	-	18.9551	16.3376	21.1695	-	1.14183	-	0.00248343	-	0.0280067	dipeptidyl-peptidase 7
XM_005709408.1	TUBB6	255.981	227.437	232.357	92.6983	114.629	117.164	-	-	-	-1.14132	-	0.000374074	-	0.0216375	-	tubulin%2C beta 6 class V
XM_005709398.1	TUBA1A	1213.82	1208.75	1203.03	477.095	625.115	594.454	564.825	616.373	550.094	-1.09552	-1.06637	0.000142	6.41e-06	0.0166985	0.00369288	tubulin%2C alpha 1a
XM_005709392.1	OBSL1	82.2357	66.6291	74.6282	28.2018	25.5898	22.8454	13.9154	20.5726	20.8763	-1.54411	-2.0132	0.00050572	0.000373839	0.0233798	0.0128528	obscurin-like 1
XM_005709383.1	HOXD1	7.60262	4.53468	7.57757	-	-	-	0.480282	0.653997	0.281461	-	-3.79966	-	0.00398921	-	0.0350399	homeobox D1
XM_005709380.1	SEPN1	161.364	129.352	160.767	79.7722	69.9758	70.5096	73.974	57.1359	46.6582	-1.03548	-1.34467	0.00221453	0.00231938	0.0381829	0.0274449	selenoprotein N%2C 1
XM_005709364.1	SDC3	103.747	88.5652	97.3271	48.4653	46.0065	38.5555	19.5641	26.5976	23.1867	-1.12253	-2.06232	0.000601865	0.000110572	0.0246388	0.00880351	syndecan 3
XM_005709361.1	LMNB2	110.442	91.525	117.648	31.0203	41.8561	40.2195	31.7619	39.9264	26.722	-1.49879	-1.69946	0.0012569	0.00105671	0.0309825	0.0196789	lamin B2
XM_005709356.1	PODN	3.77449	3.87731	2.33507	-	-	-	36.077	46.025	39.7728	-	3.60922	-	0.000224042	-	0.0111893	podocan
XM_005701122.1	MID1	1.26203	1.48795	1.12531	0.485693	0.614249	0.550317	0.365014	0.463902	0.256692	-1.23161	-1.8358	0.00270208	0.00156577	0.0409149	0.0231388	midline 1 %28Opitz%2FBBB syndrome%29%2C transcript variant X1
XM_005701120.1	EGFL6	27.8033	28.0407	29.367	7.94134	14.321	3.68996	1.75067	1.2416	1.60304	-1.71518	-4.21281	0.00321419	7.73e-07	0.0435005	0.00137008	EGF-like-domain%2C multiple 6
XM_005701104.1	TRAPPC2	0.931693	1.34079	1.62242	-	-	-	4.02589	3.72237	2.73067	-	1.42783	-	0.00752485	-	0.0483885	trafficking protein particle complex 2%2C transcript variant X2
XM_005701084.1	ASB9	19.3529	18.9822	24.1225	2.46482	4.9377	3.78349	1.76052	3.1076	1.57624	-2.48118	-3.27677	0.000690671	0.000412457	0.0259612	0.0131652	ankyrin repeat and SOCS box containing 9
XM_005701076.1	FIGF	10.7673	8.96015	11.6575	3.39854	1.59698	1.11469	3.64115	2.29543	1.21839	-2.36078	-2.13305	0.00133213	0.0015853	0.0312638	0.0232817	c-fos induced growth factor %28vascular endothelial growth factor D%29
XM_005701046.1	CDKL5	2.30849	3.04527	2.7637	1.39657	1.15131	0.793971	-	-	-	-1.28038	-	0.0045397	-	0.0494087	-	cyclin-dependent kinase-like 5
XM_005701011.1	CXHXorf23	0.46771	0.588939	0.407228	0.11318	0.0524838	0.055683	-	-	-	-2.72541	-	0.00189871	-	0.036578	-	chromosome X open reading frame%2C human CXorf23%2C transcript variant X1
XM_005700998.1	LOC100860804	51.5297	57.1854	41.6738	-	-	-	210.673	136.482	151.259	-	1.72865	-	0.00739842	-	0.0480524	spermidine%2Fspermine N-acetyltransferase
XM_005700988.1	PCYT1B	3.71612	2.68954	2.15705	-	-	-	0.16694	0.284152	0.275153	-	-3.55954	-	0.00471191	-	0.0380064	phosphate cytidylyltransferase 1%2C choline%2C beta%2C transcript variant X3
XM_005700937.1	MID1IP1	23.1052	22.2633	36.2113	-	-	-	51.4145	55.2775	58.862	-	1.02102	-	0.0050029	-	0.0391221	MID1 interacting protein 1
XM_005700933.1	MAOB	1.06497	0.924055	1.1727	-	-	-	8.24109	10.2048	7.64531	-	3.04478	-	0.000597697	-	0.0155139	monoamine oxidase B
XM_005700919.1	TSPAN7	152.98	184.412	151.12	57.3184	62.6714	66.5442	41.7583	69.7547	46.9714	-1.38895	-1.62405	0.000827301	0.0013433	0.0277888	0.0216826	tetraspanin 7
XM_005700896.1	LOC100860788	54.3425	39.1977	51.3421	13.7314	13.733	10.0805	6.19175	6.20231	4.2229	-1.94819	-3.12415	0.00171335	0.000794326	0.0342432	0.0175466	melanoma-associated antigen-like protein%2C transcript variant X1
XM_005700892.1	FGD1	38.7312	32.2312	40.9746	12.791	12.4441	11.9973	6.33038	8.1775	6.72817	-1.58805	-2.3981	0.000696043	0.000352444	0.0259612	0.0125649	FYVE%2C RhoGEF and PH domain containing 1
XM_005700869.1	HSD17B10	33.4129	35.4841	36.839	-	-	-	73.53	73.2273	82.8263	-	1.11855	-	0.000236054	-	0.0112217	hydroxysteroid %2817-beta%29 dehydrogenase 10%2C transcript variant X1
XM_005700861.1	ARHGEF9	0.892873	1.00559	1.18302	-	-	-	0.298214	0.507596	0.245761	-	-1.55108	-	0.00434709	-	0.036562	Cdc42 guanine nucleotide exchange factor %28GEF%29 9%2C transcript variant X2
XM_005700849.1	SYN1	1.27951	1.79948	1.87363	3.71552	3.28928	3.76674	8.32117	6.0837	6.62742	1.12096	2.08634	0.00128372	0.00155658	0.0309825	0.0231236	synapsin I
XM_005700848.1	ZNF157	0.897099	1.0328	0.676946	0.23156	0.107379	0.227848	-	-	-	-2.20143	-	0.00364706	-	0.0452663	-	zinc finger protein 157
XM_005700833.1	USP11	4.21174	3.68138	4.33161	-	-	-	1.30285	2.2792	1.51111	-	-1.26317	-	0.00266559	-	0.0290367	ubiquitin specific peptidase 11%2C transcript variant X4
XM_005700790.1	EBP	37.5944	25.0627	26.1718	-	-	-	56.6817	68.5161	64.0788	-	1.0914	-	0.00318326	-	0.0318829	emopamil binding protein %28sterol isomerase%29
XM_005700763.1	KCND1	6.09539	7.04401	8.2422	3.46405	2.46652	2.79279	1.26372	1.28305	1.28302	-1.29342	-2.48104	0.00356413	0.000708274	0.0449655	0.0169269	potassium voltage-gated channel%2C Shal-related subfamily%2C member 1
XM_005700749.1	PRICKLE3	6.91854	3.46795	6.59918	-	-	-	14.7051	15.6277	18.6187	-	1.52704	-	0.00273193	-	0.0294202	prickle homolog 3 %28Drosophila%29
XM_005700735.1	USP27X	3.82957	4.73524	3.78756	1.94339	1.50198	2.05389	2.53482	1.90408	1.54302	-1.16748	-1.04611	0.00291069	0.00743081	0.0416582	0.0480865	ubiquitin specific peptidase 27%2C X-linked
XM_005700728.1	NUDT11	8.3362	9.74716	6.16948	-	-	-	0.600353	2.72499	1.75913	-	-2.25398	-	0.0061349	-	0.0434435	nudix %28nucleoside diphosphate linked moiety X%29-type motif 11
XM_005700726.1	LOC102184795	243.858	230.196	231.183	97.7495	101.989	82.7252	55.4753	81.5893	68.31	-1.32004	-1.77985	4.28e-05	4.44e-05	0.0127287	0.00661839	melanoma-associated antigen D1-like
XM_005700718.1	OPHN1	0.50865	0.670991	0.553592	-	-	-	0.244211	0.138559	0.268342	-	-1.41249	-	0.004525	-	0.037082	oligophrenin 1%2C transcript variant X1
XM_005700712.1	LOC100861240	8.53861	9.48942	8.03979	-	-	-	4.88188	4.21395	3.05656	-	-1.10103	-	0.00244122	-	0.0279398	ectodysplasin-A transcript variant 1
XM_005700653.1	RGAG4	62.6409	57.6475	67.7214	23.1113	17.662	18.4471	12.1315	20.3461	13.8587	-1.66664	-2.02059	0.000218502	0.000249937	0.0189675	0.0114407	retrotransposon gag domain containing 4
XM_005700639.1	PABPC1L2B	6.70535	5.44958	4.15818	-	-	-	2.03815	1.36664	1.18764	-	-1.8287	-	0.00742923	-	0.0480865	poly%28A%29 binding protein%2C cytoplasmic 1-like 2B
XM_005700610.1	LOC102188123	4.76837	3.55143	3.82398	0.566823	1.01384	1.31466	1.88773	2.00536	2.17723	-2.06842	-1.00037	0.00196849	0.00587257	0.0373115	0.0424176	melanoma-associated antigen E2-like
XM_005700539.1	SPRY3	3.27699	3.12079	2.55951	0.466467	1.21133	0.963877	0.231373	0.577609	0.474572	-1.76161	-2.80292	0.00242331	0.000444735	0.0396901	0.0136702	sprouty homolog 3 %28Drosophila%29
XM_005700521.1	TREX2	5.62102	5.50061	3.36064	-	-	-	9.42762	10.0446	11.4399	-	1.09389	-	0.0044102	-	0.0368088	three prime repair exonuclease 2
XM_005700495.1	ZNF185	4.94741	5.41624	3.8848	25.4133	40.9805	33.7074	-	-	-	2.81258	-	0.0031852	-	0.0433825	-	zinc finger protein 185 %28LIM domain%29
XM_005700485.1	PRRG3	24.8487	27.3747	19.9764	8.27656	5.06079	4.19943	1.49695	1.99035	1.37349	-2.04161	-3.89273	0.00188555	0.000501286	0.036422	0.0142963	proline rich Gla %28G-carboxyglutamic acid%29 3 %28transmembrane%29
XM_005700469.1	AFF2	0.744232	0.881526	0.807498	-	-	-	0.120938	0.336848	0.378531	-	-1.54077	-	0.00395118	-	0.0348854	AF4%2FFMR2 family%2C member 2%2C transcript variant X2
XM_005700449.1	SLITRK2	8.64182	12.7512	11.4293	3.38831	2.82329	2.42235	0.787801	1.43033	1.96213	-1.92658	-2.97302	0.00291351	0.00161607	0.0416582	0.0234533	SLIT and NTRK-like family%2C member 2
XM_005700430.1	LOC102174371	8.76188	10.4614	8.2576	2.56297	2.50665	1.97165	2.1727	1.5737	2.09955	-1.96452	-2.23292	0.000599391	0.000481103	0.0246388	0.0139735	fibroblast growth factor 13-like
XM_005700401.1	BCORL1	11.7669	12.6604	10.4857	-	-	-	4.86703	5.08644	4.02189	-	-1.32088	-	0.000599384	-	0.0155141	BCL6 corepressor-like 1
XM_005700400.1	APLN	51.6696	47.0809	46.8268	11.8221	14.9139	15.0854	2.36583	2.95308	2.5996	-1.79947	-4.20041	5.33e-05	8.43e-06	0.0136381	0.00369288	apelin
XM_005700388.1	GPC3	547.856	563.526	500.604	249.143	188.391	165.257	161.859	124.45	112.786	-1.41911	-2.01403	0.000427959	7.3e-05	0.022363	0.00801668	glypican 3
XM_005700376.1	ELF4	19.6457	20.4148	19.315	11.6311	7.59458	8.44546	12.0648	9.11564	7.06378	-1.10149	-1.07191	0.00114268	0.00222041	0.0304079	0.0269893	E74-like factor 4 %28ets domain transcription factor%29
XM_005700371.1	SASH3	3.22674	2.4466	2.9001	1.37695	0.934419	0.826147	-	-	-	-1.45025	-	0.00301819	-	0.042445	-	SAM and SH3 domain containing 3
XM_005700321.1	GPC4	43.143	52.6359	40.8698	15	20.6527	16.3132	13.476	15.7209	14.1449	-1.39483	-1.65664	0.00210215	0.00105634	0.037851	0.0196789	glypican 4
XM_005700290.1	2015-09-06	6.70294	8.4314	8.21384	2.40301	1.91663	0.945796	1.09657	2.05584	1.60656	-2.14868	-2.29459	0.00095686	0.000529208	0.0289671	0.014677	septin 6%2C transcript variant X4
XM_005700280.1	SLC25A5	53.208	47.593	49.5561	-	-	-	201.718	182.574	182.282	-	1.91387	-	3.1e-05	-	0.00585538	solute carrier family 25 %28mitochondrial carrier%3B adenine nucleotide translocator%29%2C member 5
XM_005700260.1	LOC102188568	22.9467	27.9316	24.5128	13.4268	10.2285	7.88658	8.02747	15.1867	6.81236	-1.25713	-1.32816	0.00256708	0.00726761	0.0404505	0.0475296	angiomotin-like
XM_005700215.1	TSC22D3	0.823983	0.948625	1.0044	0.425374	0.0493135	0.209278	0.210991	0.239421	0.154559	-2.02154	-2.19859	0.00453238	0.000251173	0.0493777	0.0114407	TSC22 domain family%2C member 3%2C transcript variant X2
XM_005700204.1	RNF128	0.498486	0.691743	0.744042	2.30916	3.06856	2.61127	-	-	-	2.04622	-	0.000977844	-	0.0292946	-	ring finger protein 128%2C E3 ubiquitin protein ligase
XM_005700178.1	SLC25A53	2.15509	2.07591	2.63303	0.807496	0.748902	0.364169	0.333773	0.681746	0.391204	-1.83752	-2.28672	0.00178068	0.000885069	0.0349875	0.0183649	solute carrier family 25%2C member 53
XM_005700169.1	ARMCX4	3.76794	4.86078	2.89403	-	-	-	0.206748	0.659832	0.435423	-	-3.14568	-	0.00429626	-	0.0363315	armadillo repeat containing%2C X-linked 4
XM_005700151.1	XKRX	1.97117	0.878973	1.66793	-	-	-	12.3164	12.0097	9.58862	-	2.90813	-	0.000443912	-	0.0136702	XK%2C Kell blood group complex subunit-related%2C X-linked
XM_005700149.1	CENPI	3.32527	4.13995	3.00955	1.16466	1.66933	1.12516	-	-	-	-1.40366	-	0.00461762	-	0.0496361	-	centromere protein I
XM_005700148.1	DRP2	4.63309	6.5422	4.88621	-	-	-	0.793691	2.18049	0.826215	-	-2.07938	-	0.00559169	-	0.0415769	dystrophin related protein 2
XM_005700132.1	ARMCX6	4.23437	4.22398	3.81249	-	-	-	1.33993	1.0486	0.406158	-	-2.13448	-	0.000515097	-	0.0144247	armadillo repeat containing%2C X-linked 6%2C transcript variant X1
XM_005700130.1	ARMCX2	2.05422	2.32618	1.78858	-	-	-	0.420374	0.99073	0.805384	-	-1.47675	-	0.00450434	-	0.0370757	armadillo repeat containing%2C X-linked 2%2C transcript variant X1
XM_005700119.1	SRPX2	72.4614	61.6725	55.9891	12.5741	8.01983	6.57676	3.85403	6.63056	5.5554	-2.80681	-3.56719	0.000459775	0.000290586	0.0226896	0.0118959	sushi-repeat containing protein%2C X-linked 2
XM_005700118.1	TSPAN6	87.9683	105.414	85.4529	-	-	-	41.912	52.1413	36.3813	-	-1.09609	-	0.00315329	-	0.0317486	tetraspanin 6
XM_005700108.1	PKP3	13.1826	3.57473	12.1203	-	-	-	185.861	127.561	197.185	-	4.14419	-	0.00180471	-	0.024484	plakophilin 3
XM_005700107.1	ANO9	1.82386	1.62316	1.75517	4.73874	6.11836	5.71418	5.85313	7.21709	8.10266	1.67149	2.02503	0.000788382	0.00126037	0.0271136	0.0212059	anoctamin 9
XM_005700104.1	HRAS	37.1936	31.5251	47.4781	-	-	-	102.604	96.3372	115.402	-	1.43577	-	0.000826402	-	0.0178261	Harvey rat sarcoma viral oncogene homolog
XM_005700101.1	RASSF7	3.42789	1.10206	2.85761	-	-	-	18.0686	15.7351	23.2912	-	2.95019	-	0.00210265	-	0.0263188	Ras association %28RalGDS%2FAF-6%29 domain family %28N-terminal%29 member 7
XM_005700093.1	ATGL	14.2404	9.56694	9.86851	-	-	-	48.6267	52.9623	52.3839	-	2.19289	-	3.89e-05	-	0.00625924	adipose triglyceride lipase
XM_005700087.1	SIRT3	2.00069	1.48757	2.72909	5.74517	5.14868	6.79639	4.67474	5.30465	3.98736	1.50858	1.16763	0.00313533	0.00786747	0.0430286	0.0495326	sirtuin 3
XM_005700081.1	SIGIRR	2.89836	2.48655	2.47503	-	-	-	6.26198	9.29213	7.60604	-	1.55906	-	0.00454669	-	0.0371396	single immunoglobulin and toll-interleukin 1 receptor %28TIR%29 domain
XM_005700071.1	CTSD	68.5004	52.104	68.9943	-	-	-	361.394	233.142	342.39	-	2.30499	-	0.00349461	-	0.0331223	cathepsin D
XM_005700066.1	IGF2	2901.77	3416.9	2521.5	-	-	-	104.628	412.102	341.163	-	-3.36521	-	0.000643899	-	0.0160375	insulin-like growth factor 2 %28somatomedin A%29
XM_005700062.1	CARS	18.8018	11.0841	15.0332	-	-	-	39.6832	33.5192	49.2677	-	1.44703	-	0.00711125	-	0.047033	cysteinyl-tRNA synthetase
XM_005700049.1	CCND1	78.1345	74.3124	95.0182	-	-	-	30.0049	44.3686	41.8789	-	-1.08996	-	0.00486027	-	0.0385449	cyclin D1
XM_005700037.1	CPT1A	4.95511	7.78534	6.04424	17.934	20.3933	20.3368	33.927	35.2382	32.3458	1.64292	2.43401	0.000326463	1.95e-05	0.0211388	0.00452622	carnitine palmitoyltransferase 1A %28liver%29
XM_005700032.1	LOC102185156	0.428075	0.16801	0.0338835	-	-	-	22.8321	25.6966	28.2772	-	6.92979	-	8.7e-05	-	0.00832892	aldehyde dehydrogenase family 3 member B1-like
XM_005700027.1	TMEM134	14.9319	9.46941	10.5771	-	-	-	26.3675	25.3703	28.0383	-	1.18949	-	0.00125332	-	0.0211619	transmembrane protein 134
XM_005700019.1	SSH3	6.00207	4.39072	5.70495	-	-	-	23.2456	27.1409	26.1758	-	2.24978	-	9.26e-05	-	0.00867593	slingshot protein phosphatase 3
XM_005700014.1	LOC102179641	1.85677	2.55059	1.9106	-	-	-	6.42935	7.41829	7.55936	-	1.76055	-	0.000277538	-	0.0117023	putative uncharacterized protein C11orf80-like
XM_005700013.1	SPTBN2	11.4526	2.93621	9.90174	-	-	-	91.7932	77.9647	82.234	-	3.37491	-	9.78e-05	-	0.00871972	spectrin%2C beta%2C non-erythrocytic 2
XM_005700010.1	PELI3	0.755045	1.16066	0.657407	-	-	-	1.71368	1.75761	2.10028	-	1.11457	-	0.00706883	-	0.0469767	pellino E3 ubiquitin protein ligase family member 3
XM_005700008.1	RIN1	3.056	1.57981	3.22915	-	-	-	6.52422	6.1425	5.48883	-	1.2069	-	0.00475467	-	0.0381749	Ras and Rab interactor 1
XM_005700005.1	CNIH2	5.99229	6.19429	7.05452	0.65355	2.04568	3.0546	1.37772	0.735699	1.12797	-1.7416	-2.56951	0.00425871	0.000142646	0.0483633	0.00956479	cornichon family AMPA receptor auxiliary protein 2
XM_005700001.1	CST6	9.46027	5.87883	13.1042	1286.99	1331.41	1681.86	1708.42	1661.01	2599.47	7.24019	7.71323	0.000337619	0.0029109	0.021239	0.0303666	cystatin E%2FM
XM_005699998.1	AP5B1	10.3703	5.58621	8.3385	-	-	-	19.807	18.6476	20.5284	-	1.27964	-	0.00148833	-	0.0226736	adaptor-related protein complex 5%2C beta 1 subunit
XM_005699993.1	KCNK7	1.28547	1.32135	1.43902	38.0392	60.3369	49.2354	-	-	-	5.18922	-	0.0017479	-	0.034503	-	potassium channel%2C subfamily K%2C member 7
XM_005699990.1	CDC42EP2	38.3337	36.3765	30.7599	18.5526	14.4486	13.6119	8.97786	10.8425	18.0858	-1.17803	-1.47633	0.00200118	0.00328646	0.0375142	0.0322324	CDC42 effector protein %28Rho GTPase binding%29 2
XM_005699979.1	CDC42BPG	8.72678	6.35479	8.52713	-	-	-	40.4713	37.0827	36.954	-	2.27806	-	2.54e-05	-	0.00530395	CDC42 binding protein kinase gamma %28DMPK-like%29
XM_005699976.1	NRXN2	2.05747	2.08061	2.10611	0.645902	0.773752	0.556105	0.427167	0.545317	0.449818	-1.66011	-2.13429	2.53e-05	2.04e-06	0.0108542	0.00243567	neurexin 2
XM_005699963.1	RCOR2	25.6562	22.4166	19.1473	6.77867	5.52298	4.42589	2.89095	2.56735	2.30189	-2.00667	-3.11473	0.00108763	0.000464237	0.029956	0.0138801	REST corepressor 2
XM_005699962.1	C29H11orf84	21.2803	18.7521	22.0311	9.87593	9.36866	10.6894	6.88601	8.25856	8.42763	-1.05196	-1.39666	0.0005476	0.000314899	0.0240885	0.0123216	chromosome 29 open reading frame%2C human C11orf84
XM_005699961.1	C29H11orf95	20.1867	23.285	26.7159	11.9644	11.4307	10.4119	8.23072	9.47513	6.24778	-1.05389	-1.55097	0.00333851	0.00185804	0.0438598	0.0247949	chromosome 29 open reading frame%2C human C11orf95
XM_005699936.1	RBM4B	4.31967	5.45925	5.25586	-	-	-	1.48899	3.01718	1.94775	-	-1.22006	-	0.00752528	-	0.0483885	RNA binding motif protein 4B%2C transcript variant X1
XM_005699920.1	B3GNT1	28.3188	26.4243	32.0164	-	-	-	12.3811	13.8413	11.757	-	-1.1918	-	0.000753625	-	0.0173342	UDP-GlcNAc:betaGal beta-1%2C3-N-acetylglucosaminyltransferase 1
XM_005699913.1	PACS1	53.1966	48.0976	45.136	-	-	-	27.5138	26.1514	16.964	-	-1.05187	-	0.0034071	-	0.0329199	phosphofurin acidic cluster sorting protein 1
XM_005699901.1	EFEMP2	161.522	143.244	155.139	-	-	-	77.0814	67.4054	71.7465	-	-1.08875	-	0.000177189	-	0.0103278	EGF containing fibulin-like extracellular matrix protein 2
XM_005699899.1	OVOL1	0.786323	0.0808275	1.6627	-	-	-	66.229	50.306	54.8366	-	6.08193	-	0.000292593	-	0.0118986	ovo-like 1%28Drosophila%29
XM_005699882.1	TM7SF2	5.98631	6.99953	4.15973	-	-	-	18.9582	13.1083	15.0618	-	1.45876	-	0.00636899	-	0.0444199	transmembrane 7 superfamily member 2%2C transcript variant X1
XM_005699853.1	GPR137	3.48932	3.17532	3.30617	1.4404	1.42802	1.71055	-	-	-	-1.12269	-	0.000156643	-	0.0173633	-	G protein-coupled receptor 137%2C transcript variant X1
XM_005699818.1	LOC102171133	92.4409	56.8176	64.4648	-	-	-	6.71958	20.3334	8.56856	-	-2.58492	-	0.00697368	-	0.0467065	fatty acid desaturase 2-like
XM_005699816.1	DAGLA	5.86751	6.98628	5.68653	2.80593	1.97526	1.66322	0.469515	2.77807	0.958115	-1.52454	-2.14025	0.00160871	0.00415973	0.033494	0.0357716	diacylglycerol lipase%2C alpha
XM_005699814.1	VWCE	27.1874	21.631	36.5445	1.07332	0.516151	0.704074	0.157742	0.447492	0.433321	-5.21796	-6.36096	0.00313502	0.00296051	0.0430286	0.0306283	von Willebrand factor C and EGF domains
XM_005699799.1	SLC3A2	68.5098	44.7062	64.3251	-	-	-	182.948	151.849	183.885	-	1.5467	-	0.0008952	-	0.0184544	solute carrier family 3 %28amino acid transporter heavy chain%29%2C member 2
XM_005699773.1	ASRGL1	47.1981	47.7025	48.4585	23.3269	23.9201	16.8033	15.8056	25.7635	24.8197	-1.16235	-1.11062	0.00033215	0.00130466	0.0211388	0.0215247	asparaginase like 1
XM_005699726.1	ST14	20.7841	5.19595	17.8546	-	-	-	64.8065	54.4228	61.9303	-	2.04712	-	0.0013024	-	0.0215124	suppression of tumorigenicity 14 %28colon carcinoma%29
XM_005699724.1	NTM	4.20564	6.79553	5.26784	-	-	-	0.212547	1.44712	0.778497	-	-2.73826	-	0.00518731	-	0.0399536	neurotrimin
XM_005699723.1	IGSF9B	2.32254	2.06742	1.98051	0.417176	0.257936	0.250854	-	-	-	-2.78237	-	9.79e-05	-	0.0156871	-	immunoglobulin superfamily%2C member 9B
XM_005699722.1	JAM3	66.3852	70.0879	51.6011	30.6241	22.6278	19.1921	19.919	19.2927	18.064	-1.37636	-1.71531	0.00425027	0.00154209	0.0483633	0.0229806	junctional adhesion molecule 3
XM_005699720.1	KIRREL3	0.69621	0.68881	0.795612	2.56924	2.8125	2.52806	-	-	-	1.85889	-	3.64e-05	-	0.0126402	-	kin of IRRE like 3 %28Drosophila%29
XM_005699636.1	TMEM45B	1.48169	0.367635	2.26878	-	-	-	10.0085	7.40435	6.72063	-	2.55098	-	0.00429957	-	0.0363315	transmembrane protein 45B
XM_005699630.1	BARX2	13.5496	5.16412	9.42717	39.7653	58.4857	59.8114	50.7955	42.6738	68.9359	2.48975	2.52886	0.00330793	0.00531491	0.0438233	0.0404529	BARX homeobox 2
XM_005699611.1	CDON	48.9358	54.0417	46.8913	16.5139	11.7156	8.57088	13.7357	11.9677	6.54317	-2.0259	-2.21648	0.00027589	0.000206748	0.0199778	0.0109203	cell adhesion associated%2C oncogene regulated
XM_005699555.1	VWA5A	66.368	64.16	50.7117	-	-	-	26.0132	27.7755	15.2875	-	-1.39164	-	0.0039441	-	0.0348695	von Willebrand factor A domain containing 5A
XM_005699523.1	TMEM86A	1.43586	1.37755	0.972365	12.6888	14.9428	19.0193	27.4731	16.2249	32.0768	3.62324	4.32306	0.00153885	0.00701024	0.0333457	0.0467596	transmembrane protein 86A
XM_005699519.1	E2F8	5.33273	5.73483	7.39368	-	-	-	2.25421	2.46321	2.30366	-	-1.39474	-	0.00384503	-	0.0343364	E2F transcription factor 8
XM_005699517.1	HTATIP2	5.13831	4.89229	7.5468	-	-	-	17.9417	19.2282	20.5907	-	1.71637	-	0.000301283	-	0.0120615	HIV-1 Tat interactive protein 2%2C 30kDa
XM_005699484.1	PRCP	1.54525	1.3766	1.40949	-	-	-	0.529928	0.841867	0.362314	-	-1.32062	-	0.00444019	-	0.0368395	prolylcarboxypeptidase %28angiotensinase C%29%2C transcript variant X2
XM_005699431.1	RAB38	4.63242	3.43126	7.17705	-	-	-	45.3978	37.6342	39.9644	-	3.01261	-	0.000147754	-	0.00956479	RAB38%2C member RAS oncogene family
XM_005699415.1	NAALAD2	3.47723	6.4552	6.2368	-	-	-	0.300506	0.83355	0.709316	-	-3.13283	-	0.00796339	-	0.0498046	N-acetylated alpha-linked acidic dipeptidase 2
XM_005699414.1	FAT3	5.1662	4.20685	4.89522	0.390788	0.27518	0.306195	0.114866	0.146636	0.115698	-3.87547	-5.24134	0.000103507	8.48e-05	0.0156871	0.00832892	FAT atypical cadherin 3
XM_005699380.1	VSTM4	55.0409	57.4312	68.9126	16.9138	15.2862	13.8821	9.82113	8.98847	10.0564	-1.97677	-2.65161	0.000497382	0.000291271	0.0233308	0.0118959	V-set and transmembrane domain containing 4
XM_005699376.1	SYT15	1.3352	0.504384	1.04628	-	-	-	4.58351	3.92812	3.02889	-	1.99963	-	0.00488926	-	0.0386403	synaptotagmin XV
XM_005699347.1	WDFY4	1.88744	2.39704	2.0953	0.931748	0.78789	0.566266	1.2143	0.832921	0.59744	-1.48074	-1.27042	0.00169851	0.00589125	0.0340885	0.0424457	WDFY family member 4
XM_005699335.1	GDF10	49.3871	43.5788	70.8533	4.70801	5.54195	3.51895	11.4067	4.79019	3.75027	-3.57262	-3.03785	0.0038473	0.00514236	0.0463218	0.0397369	growth differentiation factor 10
XM_005699329.1	LOC102176495	0.28944	0.0694214	0.0840037	3.54875	5.45653	5.42157	-	-	-	5.02575	-	0.0018246	-	0.0355401	-	annexin A8-like%2C transcript variant X2
XM_005699318.1	LOC102173716	80.4229	90.4167	80.8325	41.4291	36.4217	28.1239	-	-	-	-1.24782	-	0.000664126	-	0.025516	-	glutamate dehydrogenase 1%2C mitochondrial-like
XM_005699317.1	ADIRF	15.6383	6.05899	10.4739	-	-	-	91.2536	130.42	137.925	-	3.48255	-	0.00177095	-	0.0243826	adipogenesis regulatory factor
XM_005699300.1	PLAC9	375.78	278.134	331.772	103.292	76.884	60.4145	53.8726	66.122	114.848	-2.03455	-2.06943	0.00129596	0.00177882	0.0309825	0.0243826	placenta-specific 9
XM_005699299.1	PPIF	11.2607	8.6646	8.72775	25.202	24.3082	27.9597	-	-	-	1.43495	-	0.000306547	-	0.0206418	-	peptidylprolyl isomerase F
XM_005699296.1	KCNMA1	7.8475	9.61125	8.89221	2.10103	2.02352	1.74929	0.748199	2.09222	0.645958	-2.16548	-2.91806	0.000199007	0.000387	0.0183826	0.0129353	potassium large conductance calcium-activated channel%2C subfamily M%2C alpha member 1
XM_005699294.1	FUT11	25.0446	30.2272	24.7811	-	-	-	5.48139	13.0094	6.05129	-	-1.7057	-	0.00350831	-	0.033125	fucosyltransferase 11 %28alpha %281%2C3%29 fucosyltransferase%29
XM_005699290.1	UNC5B	23.7999	18.0137	18.1356	-	-	-	94.9076	81.3994	84.9733	-	2.12379	-	0.00011459	-	0.00892294	unc-5 homolog B %28C. elegans%29
XM_005699289.1	LOC102183762	37.6494	44.9244	29.79	-	-	-	6.33795	11.6686	5.77982	-	-2.23997	-	0.00342516	-	0.0329318	uncharacterized LOC102183762
XM_005699280.1	SH2D4B	0.168051	0.12092	0.146319	-	-	-	0.40342	0.274667	0.354626	-	1.24639	-	0.00755412	-	0.048464	SH2 domain containing 4B
XM_005699270.1	MAT1A	0.195368	0.160658	0.243006	-	-	-	9.46036	18.4291	15.2933	-	6.17168	-	0.00568652	-	0.0417129	methionine adenosyltransferase I%2C alpha
XM_005699258.1	TMEM254	1.12188	0.807241	0.569804	2.66958	2.39194	2.58226	2.9176	4.07475	4.01147	1.61298	2.13862	0.000672924	0.00225842	0.0256445	0.0272163	transmembrane protein 254%2C transcript variant X2
XM_005699250.1	LOC102171217	34.1673	32.9322	26.013	-	-	-	58.2924	74.9782	73.6657	-	1.15214	-	0.00305879	-	0.0311487	40S ribosomal protein S24-like%2C transcript variant X3
XM_005699232.1	KAT6B	0.596789	0.738594	0.498831	-	-	-	0.2063	0.234099	0.134332	-	-1.6742	-	0.00516567	-	0.0398697	K%28lysine%29 acetyltransferase 6B%2C transcript variant X1
XM_005699171.1	ASCC1	3.74939	4.08136	3.13898	1.44239	1.63979	1.46505	-	-	-	-1.27047	-	0.00163526	-	0.0336149	-	activating signal cointegrator 1 complex subunit 1%2C transcript variant X1
XM_005699152.1	ADAMTS14	12.8778	12.5127	11.6709	2.85697	2.37963	2.86489	0.559616	1.24956	1.04469	-2.19366	-3.69893	1.61e-05	1.01e-05	0.0108542	0.00369288	ADAM metallopeptidase with thrombospondin type 1 motif%2C 14
XM_005699139.1	LOC102191766	3.50038	4.47346	5.64058	-	-	-	0.301001	1.02468	0.881982	-	-2.62454	-	0.00443138	-	0.0368204	core histone macro-H2A.2-like%2C transcript variant X1
XM_005699134.1	TSPAN15	28.6626	25.9448	23.7855	-	-	-	5.28156	9.65575	7.73791	-	-1.78961	-	0.000608269	-	0.0156166	tetraspanin 15
XM_005699128.1	SRGN	0.4728	1.0206	0.27444	-	-	-	3.85898	6.52551	5.82	-	3.19634	-	0.00436812	-	0.0366736	serglycin%2C transcript variant X1
XM_005699118.1	DNA2	0.975577	1.342	1.3241	0.305513	0.515172	0.382602	-	-	-	-1.59762	-	0.00373736	-	0.0458235	-	DNA replication helicase%2Fnuclease 2
XM_005699085.1	NRBF2	0.96914	1.14856	1.04236	2.31761	2.14944	2.33476	-	-	-	1.10597	-	0.000103565	-	0.0156871	-	nuclear receptor binding factor 2%2C transcript variant X1
XM_005699081.1	EGR2	0.299578	0.886187	0.43473	13.3712	16.5246	21.4314	20.7438	20.2021	20.6277	4.98522	5.24781	0.00213971	1.29e-07	0.0379278	0.000456687	early growth response 2
XM_005699074.1	RET	4.16709	5.64281	0.957447	34.6213	50.8134	55.8676	61.3544	48.1487	42.4409	3.71405	3.8188	0.002674	0.0012296	0.0409149	0.0210834	ret proto-oncogene
XM_005699068.1	ARID5B	1.33612	1.23855	1.40439	0.594218	0.486265	0.642015	0.450778	0.550865	0.262477	-1.20792	-1.65429	0.000350591	0.000742815	0.0212711	0.0171998	AT rich interactive domain 5B %28MRF1-like%29%2C transcript variant X1
XM_005699050.1	SLC16A9	1.78685	1.95824	1.57972	-	-	-	0.343158	0.359443	0.40607	-	-2.2639	-	0.000224438	-	0.0111893	solute carrier family 16%2C member 9
XM_005699017.1	NID1	337.183	315.96	282.753	146.876	124.469	82.4156	72.9114	128.072	68.5962	-1.40357	-1.79563	0.00140858	0.000866454	0.0317142	0.0182187	nidogen 1
XM_005698992.1	GNG4	8.24682	9.00964	5.75183	31.2197	42.6368	50.7463	46.7669	37.4491	31.3127	2.43711	2.32803	0.00415192	0.00257388	0.0482239	0.02852	guanine nucleotide binding protein %28G protein%29%2C gamma 4
XM_005698951.1	ZNF385D	27.5602	31.4902	33.0165	5.78536	3.87513	2.08729	3.82615	4.99296	7.70772	-2.97029	-2.47787	0.000161278	0.000225018	0.0174374	0.0111893	zinc finger protein 385D
XM_005698945.1	SLC20A2	9.45496	12.3402	6.70001	-	-	-	34.9573	31.1702	31.069	-	1.77019	-	0.000380304	-	0.0128588	solute carrier family 20 %28phosphate transporter%29%2C member 2
XM_005698934.1	UBE2E2	30.9143	28.7173	34.0374	12.8244	14.2432	14.4883	-	-	-	-1.17252	-	0.000437312	-	0.0224259	-	ubiquitin-conjugating enzyme E2E 2
XM_005698926.1	RARB	19.7338	18.0799	22.5891	6.28804	5.94179	6.10941	2.51085	4.49635	3.04633	-1.71968	-2.58691	0.000445755	0.000313516	0.022464	0.0123216	retinoic acid receptor%2C beta
XM_005698922.1	LRRC3B	13.165	11.181	13.1538	4.17807	4.64988	3.15184	1.10527	2.35162	1.41689	-1.64628	-2.94377	0.000430145	0.000137399	0.022363	0.00949865	leucine rich repeat containing 3B
XM_005698890.1	PLAT	157.684	102.832	120.023	20.9822	12.9157	10.7797	13.0046	14.5061	12.6299	-3.09043	-3.24491	0.00245941	0.00219135	0.039731	0.0269348	plasminogen activator%2C tissue
XM_005698886.1	GINS4	6.80988	7.9782	6.72743	3.08455	4.38906	3.24299	3.05995	4.5187	2.51789	-1.00553	-1.09152	0.0033473	0.00617818	0.0438598	0.0435873	GINS complex subunit 4 %28Sld5 homolog%29
XM_005698874.1	FGFR1	181.643	169.382	178.114	-	-	-	75.7106	88.4661	63.292	-	-1.21798	-	0.000245536	-	0.0114407	fibroblast growth factor receptor 1
XM_005698871.1	RAB11FIP1	5.96112	2.93128	5.89165	-	-	-	24.8411	21.0159	17.3715	-	2.09653	-	0.00244999	-	0.0279559	RAB11 family interacting protein 1 %28class I%29
XM_005698870.1	GPR124	156.069	124.917	179.477	-	-	-	35.2784	43.1635	26.2564	-	-2.13685	-	0.00200379	-	0.0257225	G protein-coupled receptor 124
XM_005698866.1	RNF122	20.7576	19.2332	16.5588	9.93395	10.15	8.11798	5.01087	4.04342	4.20087	-1.00372	-2.09296	0.00241993	0.000334927	0.0396901	0.0124319	ring finger protein 122
XM_005698858.1	MFHAS1	10.1075	9.53368	13.5451	-	-	-	37.4509	30.167	38.6862	-	1.67954	-	0.00115323	-	0.0202774	malignant fibrous histiocytoma amplified sequence 1
XM_005698829.1	STAR	0.912764	1.43985	0.825297	7.54384	9.04494	6.72074	-	-	-	2.87477	-	0.000687376	-	0.0259295	-	steroidogenic acute regulatory protein
XM_005698771.1	PDGFRL	32.3267	53.1267	41.3718	-	-	-	103.328	98.6389	114.438	-	1.31893	-	0.0011596	-	0.0203641	platelet-derived growth factor receptor-like
XM_005698760.1	FAT1	33.0824	32.1789	27.1957	-	-	-	16	17.7959	8.92209	-	-1.11394	-	0.0071224	-	0.047033	FAT atypical cadherin 1
XM_005698748.1	TENM3	24.9599	27.3708	21.0088	9.92594	8.97128	5.29036	2.83778	4.591	2.5964	-1.60032	-2.87096	0.0021605	0.000420116	0.0379278	0.0133172	teneurin transmembrane protein 3
XM_005698713.1	CCDC111	4.07578	4.86308	3.7284	1.64798	1.75997	1.86725	-	-	-	-1.2638	-	0.0019581	-	0.0372737	-	coiled-coil domain containing 111
XM_005698704.1	DCTD	42.4826	35.2647	28.9458	-	-	-	7.75496	15.43	11.3227	-	-1.62848	-	0.00587621	-	0.0424176	dCMP deaminase
XM_005698703.1	NEIL3	2.08167	2.76776	2.56111	0.700855	0.853124	1.20684	0.477995	1.08481	0.986788	-1.42449	-1.53932	0.00357095	0.00425413	0.0449803	0.0361882	nei endonuclease VIII-like 3 %28E. coli%29
XM_005698698.1	XKR5	3.01912	3.40898	4.08461	0.494555	0.750549	0.973254	0.133803	0.151832	0.032672	-2.24457	-5.04557	0.00125232	0.000410769	0.0309825	0.0131652	XK%2C Kell blood group complex subunit-related family%2C member 5
XM_005698682.1	WDR17	2.49544	2.91575	2.13288	0.88641	1.13037	1.19928	1.12116	1.39696	1.11116	-1.23005	-1.05566	0.0041776	0.0059645	0.0482239	0.0427129	WD repeat domain 17
XM_005698657.1	LOC102181360	1.24894	0.24509	1.384	-	-	-	4.25196	3.95889	4.47243	-	2.13977	-	0.00109625	-	0.0198441	uncharacterized LOC102181360
XM_005698643.1	PTPRE	4.49189	6.12694	5.3734	-	-	-	16.3154	14.0024	18.738	-	1.61705	-	0.00159308	-	0.0233235	protein tyrosine phosphatase%2C receptor type%2C E
XM_005698620.1	EMX2	16.7674	26.3823	26.0566	-	-	-	5.04417	6.82236	8.4725	-	-1.76665	-	0.00787123	-	0.0495342	empty spiracles homeobox 2
XM_005698614.1	ATRNL1	6.79711	11.6887	10.699	-	-	-	0.974151	2.98462	1.37369	-	-2.45235	-	0.00790605	-	0.0496595	attractin-like 1
XM_005698608.1	ADRA2A	9.38936	10.4818	10.6097	4.27692	4.80328	4.63577	-	-	-	-1.15205	-	0.000179645	-	0.017853	-	adrenoceptor alpha 2A
XM_005698605.1	DUSP5	0.340925	0.766593	0.816305	24.7912	25.0964	34.9062	-	-	-	5.46191	-	0.00114707	-	0.0304079	-	dual specificity phosphatase 5
XM_005698601.1	MKI67	42.9786	41.5996	46.4103	-	-	-	23.0981	26.2399	16.1113	-	-1.00099	-	0.00275334	-	0.0294716	antigen identified by monoclonal antibody Ki-67
XM_005698582.1	BUB3	9.98775	14.2391	12.8171	4.58132	3.74705	3.86897	-	-	-	-1.60267	-	0.00290767	-	0.0416582	-	BUB3 mitotic checkpoint protein%2C transcript variant X1
XM_005698567.1	PLEKHA1	1.45582	1.72648	1.29104	0.626296	0.629255	0.38516	0.258875	0.76377	0.493055	-1.44703	-1.56136	0.00329555	0.00699053	0.0438233	0.046735	pleckstrin homology domain containing%2C family A %28phosphoinositide binding specific%29 member 1%2C transcript variant X3
XM_005698563.1	TACC2	12.7643	11.1262	11.5853	23.2614	27.8156	29.5862	32.8831	30.7569	27.7946	1.18508	1.3659	0.00150065	0.000276196	0.032814	0.0117023	transforming%2C acidic coiled-coil containing protein 2
XM_005698551.1	LOC102170663	1.57983	2.97305	1.79877	-	-	-	8.75194	9.66639	11.6256	-	2.24187	-	0.00115116	-	0.0202661	protein phosphatase Slingshot homolog 3-like
XM_005698535.1	GRK5	19.36	19.7395	18.1155	11.4692	8.61778	7.34507	7.5209	11.773	9.21052	-1.06053	-1.00521	0.0016457	0.00197561	0.0336376	0.0255459	G protein-coupled receptor kinase 5
XM_005698433.1	COL17A1	40.9564	12.9461	39.4245	-	-	-	118.845	123.68	113.657	-	1.93225	-	0.000781043	-	0.0175036	collagen%2C type XVII%2C alpha 1
XM_005698429.1	SH3PXD2A	81.6917	107.284	87.5631	45.2653	43.0947	39.1923	31.6713	39.4484	30.3191	-1.1164	-1.44687	0.00333437	0.002103	0.0438598	0.0263188	SH3 and PX domains 2A
XM_005698412.1	LOC102182376	1.02277	0.705265	0.593676	-	-	-	1.9642	1.76452	2.09833	-	1.32758	-	0.00191486	-	0.0251971	steroid 17-alpha-hydroxylase%2F17%2C20 lyase-like
XM_005698410.1	SUFU	33.9848	27.1263	27.9629	-	-	-	10.0802	11.9664	8.77984	-	-1.53083	-	0.00117093	-	0.0204869	suppressor of fused homolog %28Drosophila%29
XM_005698401.1	KAZALD1	27.6678	28.1599	24.7183	9.00466	6.11946	8.78393	6.69963	4.36918	6.43084	-1.75232	-2.20249	0.000184621	8.63e-05	0.0182218	0.00832892	Kazal-type serine peptidase inhibitor domain 1
XM_005698388.1	GOLGA7B	0.370498	0.133294	0.806468	30.4831	42.5731	49.7555	52.2974	33.911	29.0582	6.55045	6.45898	0.00197432	0.00582717	0.0373115	0.0422417	golgin A7 family%2C member B
XM_005698387.1	SFRP5	2.38485	1.768	0.692152	30.2194	34.1898	34.622	34.9054	31.3405	48.6483	4.35331	4.56766	2.97e-05	0.00228623	0.011245	0.0273191	secreted frizzled-related protein 5
XM_005698382.1	LOC102172322	0.274926	0.329701	0.18618	-	-	-	0.0586651	0.033285	0.0429746	-	-2.55117	-	0.00675183	-	0.0458051	coiled-coil and C2 domain-containing protein 2A-like
XM_005698381.1	PDLIM1	25.5333	27.5069	21.8568	-	-	-	81.1985	92.843	112	-	1.93325	-	0.00152446	-	0.0228294	PDZ and LIM domain 1
XM_005698365.1	PSD	2.04949	1.49225	2.01814	-	-	-	0.58571	0.398779	0.394731	-	-2.0112	-	0.00189143	-	0.0250751	pleckstrin and Sec7 domain containing
XM_005698356.1	ELOVL3	1.22736	1.09341	0.610654	-	-	-	206.471	155.643	151.495	-	7.45293	-	0.000650072	-	0.0161248	ELOVL fatty acid elongase 3
XM_005698321.1	LOC102179909	0.498299	0.409768	0.929704	-	-	-	2.52913	3.18017	2.10305	-	2.0878	-	0.00480842	-	0.0383454	uncharacterized LOC102179909
XM_005698298.1	HOGA1	0.996847	0.956365	1.33084	-	-	-	5.23272	6.66193	6.07699	-	2.45217	-	0.000343938	-	0.0124319	4-hydroxy-2-oxoglutarate aldolase 1%2C transcript variant X1
XM_005698282.1	ARHGAP19	9.86537	14.6225	12.1928	-	-	-	2.34165	5.55593	3.40472	-	-1.6984	-	0.00711224	-	0.047033	Rho GTPase activating protein 19
XM_005698262.1	TCTN3	3.62307	3.65573	3.95226	-	-	-	1.79948	2.31421	1.37678	-	-1.03249	-	0.00275324	-	0.0294716	tectonic family member 3%2C transcript variant X1
XM_005698247.1	SLC35G1	0.868374	1.17156	0.567061	-	-	-	9.53707	7.09649	8.78058	-	3.28517	-	0.000511825	-	0.0144247	solute carrier family 35%2C member G1
XM_005698244.1	MYOF	26.2415	26.2108	28.5327	8.95055	10.8417	5.67122	9.0406	10.8236	9.24405	-1.66923	-1.47623	0.000399414	5.43e-05	0.0216375	0.00700034	myoferlin
XM_005698188.1	ANKRD22	0.678805	0.444026	0.107459	7.82489	7.42329	8.99249	9.18461	13.179	13.76	4.30036	4.87587	0.000104508	0.0013024	0.0156871	0.0215124	ankyrin repeat domain 22
XM_005698180.1	PAPSS2	12.4067	14.3202	14.7669	5.49695	5.37365	6.57831	6.5339	4.87784	2.59111	-1.24976	-1.56718	0.000610382	0.0024797	0.0248371	0.0280067	3%27-phosphoadenosine 5%27-phosphosulfate synthase 2
XM_005698149.1	ZWINT	17.2614	16.8789	21.8007	-	-	-	5.70714	6.06278	4.04728	-	-1.82241	-	0.00140552	-	0.0221569	ZW10 interacting kinetochore protein
XM_005698138.1	PRKAR1B	12.1635	9.57069	12.1144	2.79519	3.37793	2.50035	1.00833	2.95584	1.41573	-1.96441	-2.65345	0.000718252	0.00080493	0.0260058	0.0176313	protein kinase%2C cAMP-dependent%2C regulatory%2C type I%2C beta
XM_005698125.1	TTYH3	112.991	88.1867	125.77	-	-	-	30.8374	31.5648	21.0222	-	-1.97052	-	0.00215584	-	0.0266383	tweety family member 3
XM_005698119.1	CARD11	14.3541	14.2893	19.0689	4.46902	1.38158	2.53695	1.90408	2.16064	1.22827	-2.50804	-3.17221	0.00197317	0.00091981	0.0373115	0.018625	caspase recruitment domain family%2C member 11
XM_005698111.1	TNRC18	60.5169	50.2144	69.0779	-	-	-	25.8774	30.0338	24.0812	-	-1.16853	-	0.00437899	-	0.0366797	trinucleotide repeat containing 18
XM_005698084.1	GPC2	0.799154	0.718781	0.869765	0.064462	0.239138	0.190286	-	-	-	-2.27337	-	0.000744439	-	0.0264665	-	glypican 2
XM_005698079.1	NYAP1	7.61085	6.24597	6.76993	-	-	-	3.1603	3.31717	2.89381	-	-1.1382	-	0.000839368	-	0.0179389	neuronal tyrosine-phosphorylated phosphoinositide-3-kinase adaptor 1
XM_005698058.1	DTX2	11.7532	8.37636	11.4028	22.2655	25.4229	29.2647	29.2893	26.5277	33.6597	1.28715	1.50468	0.00271361	0.00116874	0.0409149	0.0204738	deltex homolog 2 %28Drosophila%29
XM_005698052.1	POR	55.4691	35.5936	56.5705	-	-	-	103.549	103.713	109.805	-	1.10277	-	0.00136753	-	0.0217873	P450 %28cytochrome%29 oxidoreductase
XM_005698043.1	CLDN3	3.03977	1.15118	3.90037	-	-	-	13.9799	17.0839	13.617	-	2.46521	-	0.000873268	-	0.0183043	claudin 3
XM_005698036.1	GTF2IRD1	15.9705	15.9222	16.2563	-	-	-	5.59663	5.84843	5.11891	-	-1.53946	-	1.56e-06	-	0.00229997	GTF2I repeat domain containing 1
XM_005698035.1	NCF1	2.73521	3.57004	3.93226	0.184713	0.34262	0.605841	0.977281	0.623793	1.20808	-3.17542	-1.86566	0.0012684	0.00324471	0.0309825	0.0320446	neutrophil cytosolic factor 1
XM_005698033.1	WBSCR17	53.5651	43.4998	31.5992	-	-	-	1.98782	5.11051	4.82353	-	-3.43193	-	0.00375337	-	0.0341198	Williams-Beuren syndrome chromosome region 17
XM_005698032.1	ASL	3.80339	3.82389	2.49501	29.0486	39.5692	50.3179	-	-	-	3.55457	-	0.00414878	-	0.0482239	-	argininosuccinate lyase
XM_005698031.1	LOC102174355	30.5486	28.9643	31.8157	10.2768	15.3785	8.99543	10.5076	16.1109	13.3785	-1.39818	-1.19117	0.000871426	0.000707106	0.0283459	0.0169269	beta-glucuronidase-like
XM_005698021.1	STX1B	3.09461	3.52224	2.35151	0.762476	0.85868	0.857432	0.108056	0.490466	0.0395778	-1.85533	-3.81299	0.0032492	0.00168131	0.0437567	0.0238753	syntaxin 1B
XM_005698007.1	MAZ	299.124	253.036	307.016	-	-	-	123.212	137.159	149.622	-	-1.06735	-	0.00126159	-	0.0212059	MYC-associated zinc finger protein %28purine-binding transcription factor%29
XM_005697991.1	GTF3C1	61.3504	46.9551	67.2789	-	-	-	22.5739	26.4118	19.8771	-	-1.35037	-	0.0049148	-	0.0387399	general transcription factor IIIC%2C polypeptide 1%2C alpha 220kDa
XM_005697987.1	CHP2	6.13114	12.0471	9.85532	32.0472	24.2601	24.6608	-	-	-	1.5302	-	0.00451257	-	0.0493777	-	calcineurin-like EF-hand protein 2
XM_005697982.1	HS3ST2	9.13181	8.167	8.57982	24.1704	33.9953	34.5933	-	-	-	1.84173	-	0.00276934	-	0.0410557	-	heparan sulfate %28glucosamine%29 3-O-sulfotransferase 2
XM_005697971.1	SYT17	2.86531	1.98535	2.35618	-	-	-	0.815219	0.462533	0.895771	-	-1.72933	-	0.00430687	-	0.0363315	synaptotagmin XVII
XM_005697968.1	NOMO1	118.515	94.9413	100.327	-	-	-	46.0665	49.1266	45.1592	-	-1.16072	-	0.00132794	-	0.0216283	NODAL modulator 1
XM_005697966.1	ABCC1	5.31652	4.59707	3.94518	-	-	-	11.2254	10.2529	8.55241	-	1.11564	-	0.00353464	-	0.0332181	ATP-binding cassette%2C sub-family C %28CFTR%2FMRP%29%2C member 1
XM_005697965.1	MYH11	5.26677	6.72795	5.70386	116.304	98.8878	97.4805	65.4681	122.999	118.297	4.14295	4.11542	8.49e-05	0.00641435	0.0147442	0.0446046	myosin%2C heavy chain 11%2C smooth muscle
XM_005697947.1	ABAT	5.20641	6.27382	7.91936	1.70009	1.01361	1.43386	0.602334	0.820195	0.573604	-2.22569	-3.28075	0.00334943	0.0018566	0.0438598	0.0247949	4-aminobutyrate aminotransferase
XM_005697941.1	C25H16orf89	0.772624	1.41511	0.733868	-	-	-	2.69781	2.5256	2.51973	-	1.40616	-	0.00215296	-	0.0266383	chromosome 25 open reading frame%2C human C16orf89
XM_005697939.1	SEC14L5	0.118865	0.156802	0.103494	-	-	-	0.741899	1.18725	0.863979	-	2.881	-	0.00385016	-	0.0343388	SEC14-like 5 %28S. cerevisiae%29
XM_005697938.1	PPL	38.0592	15.2002	38.8949	111.17	148.434	174.654	155.818	149.565	159.965	2.23643	2.33618	0.00466604	0.000117139	0.0497727	0.0089352	periplakin
XM_005697930.1	HMOX2	33.0511	26.2525	29.1509	-	-	-	68.3371	52.0086	69.8662	-	1.1046	-	0.00495545	-	0.0389294	heme oxygenase %28decycling%29 2
XM_005697915.1	ZNF213	7.93572	5.81583	6.56831	-	-	-	2.91635	3.84308	2.75657	-	-1.09446	-	0.00700965	-	0.0467596	zinc finger protein 213
XM_005697906.1	FSCN1	543.857	385.995	564.685	-	-	-	85.026	139.46	91.5188	-	-2.24168	-	0.00263715	-	0.0288377	fascin homolog 1%2C actin-bundling protein %28Strongylocentrotus purpuratus%29
XM_005697904.1	RNF216	1.33761	1.76826	1.35423	-	-	-	0.776626	0.644007	0.590791	-	-1.14886	-	0.00571341	-	0.0418236	ring finger protein 216%2C transcript variant X1
XM_005697860.1	LOC102191011	0.781703	0.642821	1.11816	2.59423	3.05761	3.56307	3.59224	3.042	2.43508	1.85762	1.83464	0.0020808	0.00388873	0.0378264	0.0345741	cytochrome P450 3A24-like
XM_005697857.1	LOC102190090	1.32727	1.59171	1.38676	-	-	-	0.764695	0.578489	0.809134	-	-1.00037	-	0.00255208	-	0.0284341	zinc finger protein 135-like%2C transcript variant X1
XM_005697831.1	GAL3ST4	20.2859	15.0064	16.5945	-	-	-	6.43697	5.68114	6.71859	-	-1.46182	-	0.00230055	-	0.0273707	galactose-3-O-sulfotransferase 4
XM_005697817.1	SRRT	2.09308	2.30768	2.55726	0.980326	1.00011	1.41476	-	-	-	-1.03518	-	0.00367959	-	0.0455365	-	serrate RNA effector molecule homolog %28Arabidopsis%29%2C transcript variant X2
XM_005697797.1	CCL24	1.45777	1.69826	1.75279	-	-	-	5.06594	5.82419	7.76381	-	1.92603	-	0.00477975	-	0.0382704	chemokine %28C-C motif%29 ligand 24
XM_005697795.1	HIP1	23.8075	24.4692	22.6423	9.40871	10.1677	7.32581	10.984	13.1087	5.4302	-1.39845	-1.26434	0.000127267	0.00420544	0.0162729	0.0360553	huntingtin interacting protein 1
XM_005697785.1	CLDN4	24.8278	8.11605	25.173	-	-	-	178.15	142.186	180.341	-	3.10685	-	0.000408708	-	0.0131355	claudin 4
XM_005697783.1	ELN	2.10308	1.16647	2.47964	-	-	-	15.7769	17.4254	27.6757	-	3.40449	-	0.0079854	-	0.0498856	elastin%2C transcript variant X2
XM_005697782.1	ELN	7.17889	6.14192	7.58451	-	-	-	48.2118	63.5797	88.5852	-	3.26077	-	0.00707319	-	0.0469767	elastin%2C transcript variant X1
XM_005697752.1	PSPH	2.34819	2.13688	2.82627	-	-	-	9.81507	10.3098	13.9426	-	2.22019	-	0.00248211	-	0.0280067	phosphoserine phosphatase%2C transcript variant X1
XM_005697732.1	PRSS8	13.111	3.14465	13.6288	-	-	-	40.8093	33.1883	47.2728	-	2.02076	-	0.0045772	-	0.0373019	protease%2C serine%2C 8
XM_005697726.1	PRSS53	6.63019	9.44786	6.9802	-	-	-	39.7388	28.7559	47.6433	-	2.33249	-	0.00501586	-	0.0391221	protease%2C serine%2C 53
XM_005697715.1	ZNF629	15.4985	15.7213	12.7524	5.66458	5.09479	6.17097	3.81317	5.36054	4.68188	-1.37698	-1.66612	0.000851783	0.000679628	0.0282816	0.0164644	zinc finger protein 629
XM_005697711.1	PHKG2	6.63428	6.73368	6.61796	3.01946	2.80036	2.92921	2.27818	3.35112	3.09047	-1.19179	-1.19662	8.7e-07	0.000320812	0.00412309	0.0123216	phosphorylase kinase%2C gamma 2 %28testis%29%2C transcript variant X1
XM_005697706.1	ITGAL	0.421856	0.676074	0.65113	-	-	-	1.21524	1.31631	1.40276	-	1.16953	-	0.00170743	-	0.0240201	integrin%2C alpha L %28antigen CD11A %28p180%29%2C lymphocyte function-associated antigen 1%3B alpha polypeptide%29
XM_005697691.1	KIF22	52.582	38.5937	49.6941	-	-	-	19.9851	19.8807	19.8316	-	-1.23862	-	0.00315924	-	0.0317539	kinesin family member 22
XM_005697689.1	PRRT2	5.46165	6.96152	6.47638	2.01395	2.14799	2.47708	1.39852	1.757	0.768355	-1.50931	-2.268	0.000907709	0.000697968	0.0285591	0.0167939	proline-rich transmembrane protein 2
XM_005697672.1	ALDOA	15.986	11.7448	14.3583	32.2505	36.4438	37.5834	-	-	-	1.33632	-	0.000465713	-	0.0228936	-	aldolase A%2C fructose-bisphosphate%2C transcript variant X2
XM_005697671.1	ALDOA	0.968404	0.139362	0.449694	-	-	-	2.54171	2.46212	2.13438	-	2.19637	-	0.00239349	-	0.0277355	aldolase A%2C fructose-bisphosphate%2C transcript variant X1
XM_005697670.1	TBX6	0.957083	1.37732	0.980375	-	-	-	0.270301	0.184034	0.277209	-	-2.1799	-	0.0035094	-	0.033125	T-box 6
XM_005697669.1	YPEL3	45.9477	36.9209	42.4733	230.311	178.711	255.826	270.651	212.282	290.667	2.40716	2.62572	0.00140493	0.000797523	0.0317142	0.0175466	yippee-like 3 %28Drosophila%29
XM_005697667.1	GDPD3	2.67855	2.60993	3.06098	11.5052	16.4313	16.4762	14.5749	11.188	14.1309	2.41122	2.25641	0.00191038	0.00060553	0.0366559	0.0156028	glycerophosphodiester phosphodiesterase domain containing 3%2C transcript variant X1
XM_005697656.1	NUPR1	19.1064	24.4407	16.6357	225.193	199.324	216.231	-	-	-	3.41233	-	1.67e-05	-	0.0108542	-	nuclear protein%2C transcriptional regulator%2C 1
XM_005697622.1	ZKSCAN2	2.75869	3.57299	2.70766	1.2785	1.48591	1.06692	0.561906	0.983758	0.493943	-1.23837	-2.14793	0.00472357	0.0018688	0.0499746	0.0248693	zinc finger with KRAB and SCAN domains 2
XM_005697591.1	CRYM	1.87044	1.13881	0.501097	7.10272	9.1706	8.83886	-	-	-	2.8387	-	0.000669511	-	0.0255906	-	crystallin%2C mu%2C transcript variant X1
XM_005697586.1	TMEM159	10.6344	15.3038	17.0874	39.6771	37.232	40.8826	-	-	-	1.45297	-	0.000348223	-	0.0212623	-	transmembrane protein 159
XM_005697563.1	THUMPD1	3.80131	3.07013	2.4992	0.45055	0.696428	1.03443	-	-	-	-2.10289	-	0.00439176	-	0.0489418	-	THUMP domain containing 1%2C transcript variant X2
XM_005697562.1	THUMPD1	0.619106	0.556841	0.673808	-	-	-	0.0743107	0.252971	0.108871	-	-2.08443	-	0.00184581	-	0.0247248	THUMP domain containing 1%2C transcript variant X1
XM_005697543.1	GPRC5B	73.5192	79.4263	63.4603	32.6505	25.9193	24.045	14.6398	32.7261	21.9686	-1.38927	-1.64209	0.00112623	0.00221397	0.0302915	0.0269732	G protein-coupled receptor%2C family C%2C group 5%2C member B
XM_005697501.1	EMP2	51.2073	42.8986	55.7532	153.28	195.503	227.625	168.095	162.099	150.755	1.94348	1.68228	0.00287995	6.34e-05	0.041569	0.00774115	epithelial membrane protein 2
XM_005697474.1	SLX4	16.0162	15.0205	17.1964	6.06764	7.88908	8.82702	6.94086	6.97738	6.46633	-1.08202	-1.24255	0.00116549	0.000139681	0.0305021	0.00956437	SLX4 structure-specific endonuclease subunit
XM_005697457.1	CCDC64B	2.836	0.539032	1.16475	-	-	-	42.287	27.9281	48.8555	-	4.71305	-	0.00356587	-	0.0333237	coiled-coil domain containing 64B
XM_005697456.1	TNFRSF12A	12.6064	13.4899	20.5452	-	-	-	55.2488	54.9447	71.6217	-	1.96279	-	0.00174136	-	0.0241877	tumor necrosis factor receptor superfamily%2C member 12A
XM_005697455.1	LOC102176755	8.70861	5.87458	5.78163	1.3698	0.781786	1.0368	-	-	-	-2.67518	-	0.00420861	-	0.0482383	-	fibroin heavy chain-like
XM_005697447.1	PRSS27	1.39754	0.335196	1.41962	10.1457	14.9506	16.7493	16.5509	13.3244	24.9857	3.73057	4.12128	0.00299399	0.00786189	0.0423616	0.0495326	protease%2C serine 27
XM_005697444.1	CCNF	19.6905	18.3154	22.5708	6.03282	9.38288	9.98108	7.30876	7.60245	7.73996	-1.25412	-1.41918	0.00261043	0.00055522	0.0406636	0.0149878	cyclin F
XM_005697436.1	RAB26	4.75468	3.94753	4.93596	1.65211	2.51724	1.68369	0.760934	0.929887	1.62937	-1.22039	-2.03831	0.00334615	0.00104126	0.0438598	0.0195409	RAB26%2C member RAS oncogene family
XM_005697391.1	CLCN7	12.1572	11.4539	14.0673	-	-	-	26.4757	26.176	31.2623	-	1.15518	-	0.0010734	-	0.0197486	chloride channel%2C voltage-sensitive 7
XM_005697384.1	LOC102177855	0.799554	1.06844	0.596709	119.959	109.614	75.9349	74.6919	86.0009	135.622	6.95366	6.90957	0.00160819	0.00636446	0.033494	0.0444102	tryptase-2-like
XM_005697369.1	FAM195A	7.63315	8.60472	10.4122	-	-	-	30.0514	46.2993	43.5802	-	2.16999	-	0.00363485	-	0.033559	family with sequence similarity 195%2C member A
XM_005697356.1	LOC102168959	1014.14	1015.27	605.053	-	-	-	11.632	14.1288	15.4816	-	-5.99723	-	0.00318784	-	0.0318829	hemoglobin subunit alpha-1-like
XM_005697355.1	LOC102168680	332.321	289.17	225.711	22.9494	70.3608	31.7261	2.63412	2.98906	2.34309	-2.76036	-6.73266	0.00215091	0.000831267	0.0379278	0.0178632	hemoglobin subunit alpha-2-like
XM_005697342.1	METRN	3.83465	4.55867	3.19361	1.45243	0.898025	0.476382	0.160094	0.90833	0.703652	-2.03524	-2.70899	0.00383764	0.00195146	0.0463101	0.0254049	meteorin%2C glial cell differentiation regulator
XM_005697330.1	SNRNP25	67.2386	43.7106	65.2095	-	-	-	115.705	138.912	119.528	-	1.08673	-	0.00316475	-	0.0317866	small nuclear ribonucleoprotein 25kDa %28U11%2FU12%29
XM_005697318.1	SERPINB2	0.422368	0.16884	1.30755	-	-	-	6.21876	5.72719	7.49346	-	3.35585	-	0.000747043	-	0.0172428	serpin peptidase inhibitor%2C clade B %28ovalbumin%29%2C member 2
XM_005697305.1	SERPINB5	15.9024	9.58877	18.4429	65.8811	98.9601	89.3313	93.6662	130.234	111.926	2.5324	2.9343	0.00232466	0.000864593	0.0390951	0.0182066	serpin peptidase inhibitor%2C clade B %28ovalbumin%29%2C member 5
XM_005697292.1	ZNF532	54.7738	58.3023	62.2625	-	-	-	21.4174	28.7572	20.5391	-	-1.31008	-	0.000501358	-	0.0142963	zinc finger protein 532
XM_005697286.1	MBD2	19.7418	28.4101	24.5386	-	-	-	58.9618	73.6567	85.7134	-	1.58669	-	0.00395329	-	0.0348854	methyl-CpG binding domain protein 2
XM_005697232.1	IMPA2	8.17996	11.6511	6.53879	33.4008	35.1876	41.0285	46.8063	34.6179	40.4734	2.05551	2.20871	0.000544615	0.00114151	0.0240885	0.0201966	inositol%28myo%29-1%28or 4%29-monophosphatase 2
XM_005697230.1	PIEZO2	35.3168	45.4253	34.7659	8.87201	6.82428	4.56287	1.61578	3.72093	1.91469	-2.51135	-3.99359	0.000994042	0.000514255	0.0293648	0.0144247	piezo-type mechanosensitive ion channel component 2
XM_005697224.1	SOGA2	3.86497	6.67442	3.30579	-	-	-	12.8366	12.8322	10.8906	-	1.40086	-	0.00350494	-	0.033125	SOGA family member 2
XM_005697222.1	LAMA1	8.43602	5.16662	8.22483	-	-	-	0.74412	0.737502	0.579598	-	-3.40457	-	0.00338279	-	0.0327914	laminin%2C alpha 1
XM_005697192.1	MYO5B	1.73871	1.32256	1.93198	20.3561	29.0172	32.5051	24.7413	22.0848	17.9144	4.03543	3.69662	0.00209235	0.000565736	0.037851	0.0151849	myosin VB
XM_005697187.1	SMAD7	0.0434138	0.15619	0.151199	0.378202	0.350759	0.413489	-	-	-	1.7034	-	0.00300441	-	0.0423616	-	SMAD family member 7%2C transcript variant X2
XM_005697150.1	SPIRE1	4.3678	5.33326	4.49443	10.3774	11.8027	10.7993	11.4385	16.8737	12.1032	1.21613	1.50947	0.000272885	0.00734502	0.0199778	0.0478152	spire homolog 1 %28Drosophila%29
XM_005697149.1	CIDEA	2.74844	7.14986	1.47263	33.4592	40.3312	55.7775	59.8883	42.0418	42.0117	3.51029	3.66206	0.0044581	0.00204521	0.0492282	0.0259487	cell death-inducing DFFA-like effector a
XM_005697126.1	ARHGAP28	33.3566	47.9015	37.6609	7.19396	4.55337	2.81804	2.2323	7.52251	2.5272	-3.02937	-3.27536	0.00150507	0.00156399	0.0328606	0.0231388	Rho GTPase activating protein 28
XM_005697125.1	EPB41L3	39.9044	43.6322	38.241	15.8435	8.63605	6.76065	5.38105	8.95564	6.65184	-1.96277	-2.53658	0.000700154	6.09e-05	0.0259612	0.00759404	erythrocyte membrane protein band 4.1-like 3
XM_005697123.1	EMILIN2	229.323	216.097	202.248	56.8282	35.8212	27.777	44.9929	37.5323	39.6459	-2.4271	-2.40635	0.000113145	2.74e-05	0.0162008	0.00546701	elastin microfibril interfacer 2
XM_005697110.1	ZNF521	16.0535	17.5549	15.5267	9.36302	4.95682	4.81098	4.35944	6.37297	3.75447	-1.36085	-1.76201	0.00343673	0.000318296	0.0441384	0.0123216	zinc finger protein 521
XM_005697108.1	CDH2	13.5491	17.8169	18.6615	2.62755	2.94546	2.72033	1.79062	2.49486	1.71019	-2.5927	-3.06073	0.00092934	0.000787484	0.0285935	0.0175036	cadherin 2%2C type 1%2C N-cadherin %28neuronal%29
XM_005697107.1	DSG1	10.2093	9.42921	13.7316	57.7686	64.2237	48.9813	-	-	-	2.35714	-	0.000573683	-	0.0243248	-	desmoglein 1
XM_005697103.1	GAREM	10.8101	12.6948	11.797	4.9498	6.10776	6.54944	5.03622	6.22282	5.44162	-1.0036	-1.07984	0.00123331	0.000659107	0.0309825	0.0162168	GRB2 associated%2C regulator of MAPK1
XM_005697100.1	ASXL3	3.18405	4.04931	2.87546	0.559062	0.545085	0.578311	0.170647	0.161368	0.0937544	-2.58697	-4.5694	0.00132917	0.000786833	0.0312638	0.0175036	additional sex combs like 3 %28Drosophila%29
XM_005697097.1	MOCOS	0.768279	1.03351	0.407174	6.11093	6.86697	4.83583	8.14707	7.425	5.16918	3.01155	3.23106	0.00110344	0.00250992	0.0301471	0.0281595	molybdenum cofactor sulfurase
XM_005697095.1	TPGS2	17.947	18.3592	21.9332	-	-	-	7.4747	9.1887	11.1792	-	-1.0647	-	0.00362617	-	0.0335444	tubulin polyglutamylase complex subunit 2
XM_005697088.1	CNDP1	1.85806	0.260868	1.53887	-	-	-	4.65624	3.80225	5.48291	-	1.93033	-	0.00758975	-	0.0485151	carnosine dipeptidase 1 %28metallopeptidase M20 family%29
XM_005697084.1	ZNF516	12.2868	13.9525	12.2724	5.43859	3.696	4.87471	3.1007	3.43054	3.691	-1.45891	-1.91358	0.00042064	8.56e-05	0.022363	0.00832892	zinc finger protein 516
XM_005697079.1	DLGAP1	1.69248	1.67449	1.51046	0.655296	0.341857	0.362695	0.243776	0.184416	0.089288	-1.84267	-3.23654	0.000549707	3.82e-05	0.0240885	0.00625924	discs%2C large %28Drosophila%29 homolog-associated protein 1
XM_005697064.1	TYMS	54.9916	56.6872	63.6707	14.2196	27.1926	22.2257	17.4143	20.5399	24.919	-1.46227	-1.47971	0.00128576	0.000399566	0.0309825	0.0131046	thymidylate synthetase
XM_005697059.1	LOC102170746	8.4411	8.80691	6.67584	-	-	-	1.89127	3.2958	1.43491	-	-1.85312	-	0.0026175	-	0.0287115	profilin-2-like
XM_005697042.1	TTC39C	2.27134	1.50358	2.25449	-	-	-	5.88873	6.63272	7.73277	-	1.74814	-	0.00132167	-	0.0216177	tetratricopeptide repeat domain 39C
XM_005697020.1	DSC3	0.594109	0.0712478	0.431069	1.9169	2.00003	1.60325	-	-	-	2.33191	-	0.00167419	-	0.0339143	-	desmocollin 3%2C transcript variant X1
XM_005697014.1	DSG3	7.49087	4.80297	7.42626	12.324	14.781	12.7386	-	-	-	1.01468	-	0.00453343	-	0.0493777	-	desmoglein 3
XM_005697013.1	DSG4	0.0246582	0.0177426	0.0429391	38.0217	43.4752	40.7941	33.6933	54.6228	38.1066	10.4848	10.5327	1.33e-05	0.00271321	0.0108542	0.0293547	desmoglein 4
XM_005696988.1	MAPRE2	70.2445	63.7631	79.1563	27.9819	32.7425	21.6793	18.5491	33.2654	21.0945	-1.37118	-1.54779	0.00136585	0.00183093	0.0314837	0.0246715	microtubule-associated protein%2C RP%2FEB family%2C member 2
XM_005696965.1	LOC102170373	1.17716	0.781859	2.32581	-	-	-	13.4337	19.8811	17.6751	-	3.5729	-	0.00132821	-	0.0216283	plasminogen activator inhibitor 2-like
XM_005696963.1	SERPINB8	1.66326	1.08799	1.77731	-	-	-	6.09809	4.2013	5.37115	-	1.79093	-	0.00330052	-	0.0322388	serpin peptidase inhibitor%2C clade B %28ovalbumin%29%2C member 8%2C transcript variant X1
XM_005696960.1	DSEL	40.0054	43.02	36.5737	6.89275	6.05142	3.56259	3.07316	5.6014	3.03914	-2.85708	-3.35194	8.37e-05	6.16e-05	0.0147234	0.00759404	dermatan sulfate epimerase-like
XM_005696946.1	PQLC1	15.5182	12.0888	11.0548	-	-	-	30.2947	24.455	30.5818	-	1.14217	-	0.00296157	-	0.0306283	PQ loop repeat containing 1
XM_005696945.1	HSBP1L1	0.869202	0.625427	1.34542	11.6854	11.6177	13.8896	12.7978	17.9949	10.0542	3.71103	3.84624	0.000122546	0.00562225	0.0162008	0.0416353	heat shock factor binding protein 1-like 1
XM_005696940.1	LOC102184018	1.20295	1.31438	1.39652	6.85699	8.9592	11.033	7.18734	9.17528	10.5614	2.77822	2.78223	0.00317881	0.00144307	0.0433473	0.022494	glyoxylate reductase%2Fhydroxypyruvate reductase-like
XM_005696924.1	SLC22A23	9.47695	4.29349	7.94583	-	-	-	42.8041	28.7797	35.7381	-	2.3051	-	0.00274747	-	0.0294532	solute carrier family 22%2C member 23
XM_005696915.1	DSP	216.77	72.8578	193.217	-	-	-	544.785	507.36	424.73	-	1.61291	-	0.00434686	-	0.036562	desmoplakin
XM_005696891.1	TFAP2A	8.66285	3.07013	12.0457	-	-	-	26.6932	34.7983	27.0116	-	1.89606	-	0.00441539	-	0.0368088	transcription factor AP-2 alpha %28activating enhancer binding protein 2 alpha%29
XM_005696884.1	PHACTR1	9.44589	7.52721	7.76322	1.96536	2.53599	1.68161	2.79737	2.45287	2.01814	-2.00026	-1.76693	0.000698504	0.000832946	0.0259612	0.0178632	phosphatase and actin regulator 1
XM_005696883.1	GFOD1	3.92768	3.50194	3.94017	11.984	9.88796	12.6864	-	-	-	1.60383	-	0.00082134	-	0.027653	-	glucose-fructose oxidoreductase domain containing 1
XM_005696852.1	ADTRP	1.5509	0.538729	3.44571	-	-	-	17.5112	13.694	15.1224	-	3.06513	-	0.000632739	-	0.0158992	androgen-dependent TFPI-regulating protein%2C transcript variant X1
XM_005696815.1	LRRC16A	3.10759	2.39672	2.05765	-	-	-	8.13009	10.6044	8.79599	-	1.8642	-	0.00114724	-	0.0202387	leucine rich repeat containing 16A
XM_005696750.1	LOC102184572	3.51524	3.75044	4.01053	-	-	-	10.1264	8.71718	13.4717	-	1.51893	-	0.00776899	-	0.049087	histone H2B type 1-M-like%2C transcript variant X1
XM_005696742.1	LOC102182181	39.8252	25.3203	47.151	-	-	-	77.6971	92.0696	92.0442	-	1.22121	-	0.00338724	-	0.032812	histone H2B type 1-like
XM_005696708.1	ZKSCAN4	0.602665	0.731772	0.852689	-	-	-	0.144675	0.0820845	0.15897	-	-2.50338	-	0.00138478	-	0.0219275	zinc finger with KRAB and SCAN domains 4%2C transcript variant X1
XM_005696676.1	ATAT1	13.7834	17.6526	14.0107	5.55371	7.51886	6.90936	2.65972	3.30554	4.3142	-1.18548	-2.14441	0.00355882	0.000948643	0.0449655	0.018903	alpha tubulin acetyltransferase 1
XM_005696663.1	DDAH2	192.27	168.279	199.852	-	-	-	74.4567	91.4568	85.0967	-	-1.15872	-	0.00065515	-	0.0161756	dimethylarginine dimethylaminohydrolase 2
XM_005696660.1	EHMT2	48.5766	40.6952	53.2211	-	-	-	22.6005	25.4568	21.41	-	-1.03648	-	0.00319607	-	0.0318977	euchromatic histone-lysine N-methyltransferase 2
XM_005696658.1	LOC102177484	13.0387	12.0683	6.8953	-	-	-	70.6672	66.0129	50.9907	-	2.55196	-	0.00113949	-	0.0201966	complement C4-like
XM_005696642.1	TRIM10	0.634186	0.707301	0.69022	-	-	-	56.2989	32.4435	61.4938	-	6.2084	-	0.00524759	-	0.0401777	tripartite motif containing 10%2C transcript variant X2
XM_005696639.1	RNF39	0.117324	0.16884	0.102153	0.454258	0.52662	0.446976	0.675952	0.639195	0.495162	1.87854	2.22093	0.000436099	0.00128131	0.0224259	0.021313	ring finger protein 39%2C transcript variant X2
XM_005696631.1	IER3	26.478	25.2684	25.84	212.314	217.59	250.205	251.178	240.483	293.384	3.13189	3.3389	7.12e-05	0.000128046	0.0145856	0.00936659	immediate early response 3
XM_005696629.1	LOC102168953	193.35	150.968	192.397	51.666	64.0346	53.8241	42.3293	60.1124	39.226	-1.66266	-1.92164	0.00107391	0.00103001	0.0297408	0.0194846	tubulin beta-5 chain-like%2C transcript variant X2
XM_005696627.1	MDC1	26.9488	28.8628	26.2936	-	-	-	11.4834	15.5175	10.2999	-	-1.13826	-	0.00105141	-	0.0196319	mediator of DNA-damage checkpoint 1
XM_005696626.1	NRM	12.7331	10.2794	13.6284	2.64538	5.63173	4.96932	3.51893	3.18094	2.57776	-1.46785	-1.98163	0.00445821	0.000925786	0.0492282	0.0186474	nurim %28nuclear envelope membrane protein%29%2C transcript variant X3
XM_005696621.1	PRR3	24.8006	22.9705	26.8879	-	-	-	12.8039	12.6361	11.7013	-	-1.00729	-	0.000452345	-	0.013816	proline rich 3
XM_005696580.1	LOC102180547	1.22172	0.879083	2.58336	11.15	14.6496	16.4568	10.8097	17.7812	19.9497	3.1733	3.37333	0.00158792	0.00647206	0.033494	0.0447643	sperm acrosome membrane-associated protein 4-like%2C transcript variant X4
XM_005696556.1	PPT2	34.7803	33.7149	30.9399	-	-	-	83.8253	59.2104	76.1374	-	1.14024	-	0.00560672	-	0.0416013	palmitoyl-protein thioesterase 2
XM_005696555.1	EGFL8	17.2937	16.6577	17.1741	10.3218	6.49763	7.41993	3.76686	5.35809	6.41264	-1.07669	-1.71828	0.00155419	0.000116541	0.033494	0.0089352	EGF-like-domain%2C multiple 8
XM_005696546.1	LPAAT	34.6791	31.1005	33.0439	-	-	-	15.1	17.9243	15.1089	-	-1.03782	-	0.00026851	-	0.0117023	lysophosphatidic acid acyltransferase
XM_005696526.1	LOC102189356	8.45065	9.06756	11.2304	-	-	-	75.3803	99.7533	129.679	-	3.40636	-	0.00425369	-	0.0361882	mamu class II histocompatibility antigen%2C DR alpha chain-like
XM_005696524.1	TRAM2	33.3464	32.7544	29.0664	20.0462	14.9761	12.0707	10.7858	15.5405	9.40847	-1.01495	-1.41314	0.00397328	0.000981735	0.0472011	0.0192436	translocation associated membrane protein 2
XM_005696522.1	C23H6orf141	0.841825	0.673032	1.79169	-	-	-	4.04174	4.89211	3.55289	-	1.917	-	0.00427909	-	0.0362964	chromosome 23 open reading frame%2C human C6orf141
XM_005696504.1	ZNF318	8.90411	11.5675	8.91446	4.5826	4.61864	3.38491	2.67342	4.96289	2.5089	-1.22329	-1.53433	0.00454364	0.0057048	0.0494142	0.0417821	zinc finger protein 318
XM_005696497.1	TRERF1	6.89587	9.01867	7.36988	2.60693	2.49747	1.80405	1.39253	1.56405	1.30113	-1.75293	-2.45121	0.0013866	0.000610437	0.0316655	0.0156274	transcriptional regulating factor 1
XM_005696495.1	C23H6orf132	15.3595	9.66394	12.0049	-	-	-	48.0535	36.0993	43.1659	-	1.78174	-	0.00143603	-	0.0224381	chromosome 23 open reading frame%2C human C6orf132
XM_005696491.1	FRS3	5.04396	4.61916	5.04047	-	-	-	1.92634	2.93536	1.49176	-	-1.21055	-	0.00347897	-	0.0330836	fibroblast growth factor receptor substrate 3
XM_005696489.1	MDFI	74.6686	59.6366	82.8166	-	-	-	22.3708	18.354	23.1076	-	-1.76614	-	0.00182094	-	0.0246076	MyoD family inhibitor
XM_005696477.1	PIM1	8.1031	7.41677	6.69212	45.1574	45.6782	59.9256	56.6974	44.0816	53.5194	2.76285	2.79631	0.000909845	0.000320342	0.028564	0.0123216	pim-1 oncogene
XM_005696474.1	RAB44	0.0608794	0.219026	0.318041	-	-	-	1.13994	1.52571	1.19905	-	2.69227	-	0.00153055	-	0.0228567	RAB44%2C member RAS oncogene family
XM_005696472.1	PNPLA1	0.258643	0.29245	0.0965128	-	-	-	15.7884	11.9171	13.307	-	5.98481	-	0.000288814	-	0.0118959	patatin-like phospholipase domain containing 1
XM_005696466.1	DEF6	7.77346	5.62407	6.21042	-	-	-	16.6922	16.8006	13.4595	-	1.25976	-	0.00199597	-	0.0257187	differentially expressed in FDCP 6 homolog %28mouse%29
XM_005696455.1	LOC102184208	7.03461	7.41963	8.59773	2.4107	2.03965	1.58137	0.734224	1.66632	0.829824	-1.93425	-2.83512	0.000424731	0.000286443	0.022363	0.0118548	ras%2FRap GTPase-activating protein SynGAP-like
XM_005696442.1	GCLC	6.64814	5.03988	5.53002	14.0767	15.0003	13.2009	15.6174	20.8587	22.505	1.29599	1.77633	0.000289727	0.00283396	0.0201731	0.0299723	glutamate-cysteine ligase%2C catalytic subunit
XM_005696424.1	LOC102174170	14.3509	5.4632	11.9866	-	-	-	28.8422	34.0923	31.6921	-	1.57319	-	0.00238625	-	0.0277355	glutathione S-transferase A1-like
XM_005696367.1	RCAN2	10.0307	9.30088	13.0553	1.50142	0.371327	1.18188	2.8796	1.23944	1.74573	-3.40634	-2.46526	0.00122506	0.00209268	0.0309825	0.0263157	regulator of calcineurin 2%2C transcript variant X2
XM_005696366.1	RCAN2	3.85115	3.09707	3.84625	-	-	-	0.652588	0.987362	1.27479	-	-1.88885	-	0.0010424	-	0.0195409	regulator of calcineurin 2%2C transcript variant X1
XM_005696361.1	SUPT3H	3.51395	2.697	3.3315	-	-	-	0.749824	0.42543	1.04362	-	-2.10453	-	0.00132529	-	0.0216283	suppressor of Ty 3 homolog %28S. cerevisiae%29%2C transcript variant X1
XM_005696325.1	CUL7	121.251	92.7709	115.164	-	-	-	41.2477	47.0789	32.8172	-	-1.44219	-	0.00194623	-	0.0254049	cullin 7
XM_005696318.1	GNMT	1.71746	1.71637	2.65843	58.4618	70.0658	74.6093	62.3933	44.2893	58.9273	5.05933	4.76467	0.000167641	0.0006664	0.0174374	0.0163113	glycine N-methyltransferase
XM_005696309.1	GUCA1A	1.42906	0.942582	0.414755	3.80398	3.74177	3.85643	-	-	-	2.03284	-	0.00062145	-	0.0248753	-	guanylate cyclase activator 1A %28retina%29
XM_005696305.1	CCND3	63.1201	56.2264	46.0233	22.2203	20.3863	22.7373	-	-	-	-1.33957	-	0.00266154	-	0.0408879	-	cyclin D3
XM_005696302.1	TREM1	0.775145	0.2231	0.134981	-	-	-	2.23296	2.6183	2.61717	-	2.72037	-	0.000889296	-	0.018423	triggering receptor expressed on myeloid cells 1
XM_005696300.1	TREM2	20.4657	13.1579	13.0344	0.550273	0.680458	0.360968	1.36471	1.44536	0.333235	-4.87348	-3.89177	0.00363161	0.00427966	0.0451863	0.0362964	triggering receptor expressed on myeloid cells 2
XM_005696276.1	PI16	4.33845	3.74604	4.10121	308.797	215.469	191.533	327.164	243.522	328.509	5.87629	6.20537	0.00279891	0.000461881	0.0412396	0.0138389	peptidase inhibitor 16
XM_005696269.1	CDKN1A	30.9889	44.5249	23.9837	126.649	179.015	189.083	159.552	144.498	132.933	2.31396	2.13484	0.0028905	0.000326711	0.041569	0.0124133	cyclin-dependent kinase inhibitor 1A %28p21%2C Cip1%29
XM_005696263.1	MAPK13	13.0817	5.32896	10.9079	-	-	-	78.0939	65.3878	91.9206	-	3.00524	-	0.00101146	-	0.0193185	mitogen-activated protein kinase 13
XM_005696240.1	LOC102172109	5.97064	6.17569	6.8231	-	-	-	17.7968	13.147	18.2867	-	1.37588	-	0.0036875	-	0.0337592	uncharacterized LOC102172109
XM_005696239.1	HMGA1	24.6132	10.5471	17.9739	-	-	-	46.5065	43.789	39.1372	-	1.28449	-	0.00521706	-	0.0400304	high mobility group AT-hook 1%2C transcript variant X2
XM_005696226.1	KIFC1	39.8914	34.8257	47.0797	-	-	-	19.7329	18.339	22.5657	-	-1.00619	-	0.00564365	-	0.0416675	kinesin family member C1
XM_005696191.1	FAM83B	2.79446	1.70607	2.82018	5.69669	6.59466	5.20211	-	-	-	1.25676	-	0.00347999	-	0.0444563	-	family with sequence similarity 83%2C member B
XM_005696168.1	MGLL	10.287	9.36575	10.2363	26.6885	25.1917	26.1274	23.7206	30.2719	23.3817	1.38399	1.37223	7.06e-06	0.00219593	0.00782184	0.026964	monoglyceride lipase
XM_005696162.1	EFCC1	0.24493	0.484653	0.533142	1.65956	1.70405	2.0412	-	-	-	2.09771	-	0.00077092	-	0.0268332	-	EF-hand and coiled-coil domain containing 1
XM_005696159.1	ACAD9	33.0741	20.7546	32.7958	-	-	-	78.256	66.414	75.8014	-	1.34774	-	0.00119801	-	0.0207649	acyl-CoA dehydrogenase family%2C member 9
XM_005696156.1	FBLN2	96.4224	89.6863	93.4472	-	-	-	206.527	160.042	199.112	-	1.01685	-	0.00280109	-	0.029821	fibulin 2
XM_005696138.1	ATP2B2	0.151729	0.0181959	0.198162	-	-	-	3.83663	3.27898	2.95279	-	4.77365	-	0.000253751	-	0.0114528	ATPase%2C Ca%2B%2B transporting%2C plasma membrane 2
XM_005696137.1	CLEC3B	403.809	364.118	279.155	-	-	-	867.37	737.224	1028.25	-	1.33025	-	0.00452101	-	0.037082	C-type lectin domain family 3%2C member B
XM_005696123.1	KLHL18	8.46924	7.2986	7.03106	-	-	-	18.2034	14.5935	13.4733	-	1.02112	-	0.00635252	-	0.0443535	kelch-like family member 18
XM_005696099.1	MAPKAPK3	6.74639	6.0574	5.62007	12.1006	15.935	16.0545	17.6981	18.261	17.0126	1.25888	1.52365	0.00308191	1.91e-05	0.0429915	0.00452622	mitogen-activated protein kinase-activated protein kinase 3
XM_005696095.1	ACY1	15.4824	9.49576	14.5074	-	-	-	24.9903	30.7676	29.6636	-	1.11327	-	0.00395049	-	0.0348854	aminoacylase 1
XM_005696087.1	PRKCD	7.73489	5.44144	7.96141	-	-	-	23.9938	22.6838	21.3991	-	1.68734	-	0.000141618	-	0.00956479	protein kinase C%2C delta
XM_005696077.1	LRIG1	157.021	135.176	197.844	56.4379	47.8615	51.0862	40.4782	45.5602	33.9241	-1.65705	-2.03032	0.00383889	0.00272016	0.0463101	0.0293827	leucine-rich repeats and immunoglobulin-like domains 1
XM_005696044.1	CXCR6	0.0971705	0.139837	0.0846049	-	-	-	0.419878	0.423516	0.273403	-	1.79597	-	0.0070875	-	0.0470037	chemokine %28C-X-C motif%29 receptor 6
XM_005696042.1	CCR1	2.11867	2.68013	2.14223	0.727695	0.705568	0.520749	-	-	-	-1.82871	-	0.00103353	-	0.0297408	-	chemokine %28C-C motif%29 receptor 1
XM_005696026.1	ALS2CL	1.39726	1.10179	1.54988	4.39093	3.9864	4.86745	4.83377	6.94502	5.23735	1.70981	2.07129	0.000432888	0.00281499	0.022363	0.029821	ALS2 C-terminal like
XM_005696013.1	LOC102171384	0.524962	0.482658	0.622132	0.14115	0.235633	0.138887	-	-	-	-1.66013	-	0.00205748	-	0.0377607	-	serine%2Farginine repetitive matrix protein 2-like%2C transcript variant X3
XM_005695982.1	SLC25A20	20.4775	20.7882	19.7184	-	-	-	52.3844	45.548	39.7508	-	1.17485	-	0.00222054	-	0.0269893	solute carrier family 25 %28carnitine%2Facylcarnitine translocase%29%2C member 20
XM_005695954.1	MST1	0.176313	0.507459	0.537296	-	-	-	3.68231	2.97777	2.88347	-	2.96638	-	0.000561215	-	0.0150921	macrophage stimulating 1 %28hepatocyte growth factor-like%29
XM_005695942.1	FAM212A	88.1976	83.1938	111.783	41.1312	36.4463	38.3542	22.7739	33.1107	28.0942	-1.28842	-1.75359	0.00334075	0.0020408	0.0438598	0.0259159	family with sequence similarity 212%2C member A
XM_005695941.1	TRAIP	3.84904	4.56975	4.18913	-	-	-	1.77407	1.8873	1.94936	-	-1.16807	-	0.000405241	-	0.013128	TRAF interacting protein
XM_005695933.1	SLC38A3	1.7016	1.38608	1.06225	-	-	-	11.5608	6.92663	10.5465	-	2.80658	-	0.00426648	-	0.0362497	solute carrier family 38%2C member 3
XM_005695906.1	GRM2	0.0608989	0.131458	0.132559	-	-	-	0.497056	0.564032	0.792482	-	2.51217	-	0.00530134	-	0.0404363	glutamate receptor%2C metabotropic 2
XM_005695855.1	MUSTN1	16.1629	27.8067	16.8238	-	-	-	200.011	242.454	205.584	-	3.41412	-	0.000145115	-	0.00956479	musculoskeletal%2C embryonic nuclear protein 1
XM_005695837.1	CACNA2D3	0.108022	0.330339	0.188107	-	-	-	1.29658	1.76555	1.4057	-	2.83426	-	0.00119718	-	0.0207649	calcium channel%2C voltage-dependent%2C alpha 2%2Fdelta subunit 3
XM_005695830.1	ARHGEF3	0.357154	0.492559	0.362797	-	-	-	0.0571585	0.0972906	0.0418709	-	-2.62672	-	0.00199834	-	0.0257187	Rho guanine nucleotide exchange factor %28GEF%29 3%2C transcript variant X3
XM_005695818.1	ARF4	182.136	220.549	171.685	85.9369	109.264	79.4329	-	-	-	-1.06447	-	0.00455676	-	0.0494479	-	ADP-ribosylation factor 4
XM_005695792.1	ABHD6	2.85426	3.63616	2.85182	-	-	-	6.73956	7.18882	6.74723	-	1.14609	-	0.000229862	-	0.0112217	abhydrolase domain containing 6
XM_005695759.1	ADAMTS9	1.79697	2.36274	1.5646	-	-	-	0.19862	0.774755	0.336462	-	-2.12771	-	0.00744932	-	0.0481623	ADAM metallopeptidase with thrombospondin type 1 motif%2C 9%2C transcript variant X1
XM_005695706.1	BHLHE40	6.70857	5.35327	4.40155	26.4667	30.4259	32.4925	30.1024	34.9553	26.0768	2.44077	2.46874	0.000210891	0.000718634	0.0186167	0.0170282	basic helix-loop-helix family%2C member e40
XM_005695702.1	SRGAP3	12.362	11.0298	13.831	2.48291	2.08079	2.56085	0.504491	0.808192	0.282605	-2.38531	-4.54429	0.000259327	0.00013418	0.019772	0.00937708	SLIT-ROBO Rho GTPase activating protein 3
XM_005695691.1	ABHD5	4.27647	5.315	3.94913	-	-	-	42.0181	38.078	46.5194	-	3.22509	-	0.000108091	-	0.00880351	abhydrolase domain containing 5
XM_005695686.1	ZBTB47	76.8744	60.2736	74.3769	-	-	-	19.5998	29.8951	26.7108	-	-1.47286	-	0.00167304	-	0.0238294	zinc finger and BTB domain containing 47
XM_005695683.1	ULK4	3.19226	2.42226	2.69523	-	-	-	1.35617	1.45458	1.03428	-	-1.11181	-	0.00452586	-	0.037082	unc-51 like kinase 4
XM_005695677.1	SCN5A	3.03649	4.93875	4.97095	-	-	-	0.577074	0.189557	0.489476	-	-3.3655	-	0.00389888	-	0.0346209	sodium channel%2C voltage-gated%2C type V%2C alpha subunit
XM_005695670.1	DLEC1	0.243006	0.149874	0.30226	-	-	-	0.733362	0.756527	1.07443	-	1.8832	-	0.00628905	-	0.0440794	deleted in lung and esophageal cancer 1
XM_005695668.1	ITGA9	27.6509	27.0243	33.2947	8.55981	7.13963	4.0957	2.67511	5.92	4.04936	-2.15186	-2.7985	0.000682354	0.000338959	0.0258192	0.0124319	integrin%2C alpha 9
XM_005695666.1	DCLK3	0.215494	0.439328	0.187627	-	-	-	5.55247	6.33977	6.44216	-	4.44382	-	3.72e-05	-	0.00619967	doublecortin-like kinase 3
XM_005695661.1	SUSD5	2.47834	2.65368	2.20924	0.970992	1.19188	0.36531	0.651609	0.385779	0.47733	-1.53793	-2.27698	0.00452502	0.000210362	0.0493777	0.0109203	sushi domain containing 5
XM_005695660.1	CRTAP	89.6884	87.3007	101.629	50.8778	47.5177	38.9072	37.3695	46.0289	43.3715	-1.02093	-1.13608	0.00116026	0.000587004	0.0304999	0.0153771	cartilage associated protein
XM_005695656.1	CMTM8	7.40515	6.43838	7.2535	-	-	-	25.7762	19.8358	22.4632	-	1.69009	-	0.000852684	-	0.0180631	CKLF-like MARVEL transmembrane domain containing 8
XM_005695630.1	CAMK1	73.9069	56.392	74.5041	13.224	16.0933	16.3761	7.55114	15.9754	10.9224	-2.16418	-2.57171	0.000918815	0.000904743	0.0285935	0.0184899	calcium%2Fcalmodulin-dependent protein kinase I
XM_005695606.1	ZNF502	0.728694	0.811222	0.622493	-	-	-	0.198033	0.26966	0.135396	-	-1.8422	-	0.00148739	-	0.0226736	zinc finger protein 502%2C transcript variant X2
XM_005695593.1	ANO10	13.0067	11.1703	20.5672	31.3528	30.8104	32.4887	-	-	-	1.08093	-	0.00467677	-	0.0497727	-	anoctamin 10
XM_005695592.1	LOC102173339	0.111968	0.0805656	0.0731166	0.812847	0.502577	0.773157	-	-	-	2.97492	-	0.00346789	-	0.0443587	-	5-beta-cholestane-3-alpha%2C7-alpha-diol 12-alpha-hydroxylase-like
XM_005695576.1	CCK	2.67896	2.23199	2.20977	-	-	-	0.676955	0.921806	1.19015	-	-1.35232	-	0.0024665	-	0.0280067	cholecystokinin
XM_005695574.1	CTNNB1	3.04127	3.21222	2.52652	-	-	-	5.65311	5.86761	7.37946	-	1.10611	-	0.00437796	-	0.0366797	catenin %28cadherin-associated protein%29%2C beta 1%2C 88kDa%2C transcript variant X3
XM_005695550.1	ACAA1	56.6898	36.143	56.7778	-	-	-	102.075	91.8694	106.965	-	1.00811	-	0.00351071	-	0.033125	acetyl-CoA acyltransferase 1
XM_005695549.1	PLCD1	19.9262	16.4123	18.8747	-	-	-	136.845	102.555	136.774	-	2.76832	-	0.000734272	-	0.0171919	phospholipase C%2C delta 1
XM_005695542.1	TRANK1	18.6458	18.4038	16.7728	7.68032	5.70387	4.74858	4.262	5.07921	4.34099	-1.56961	-1.97591	0.000339027	3.15e-05	0.021239	0.00585538	tetratricopeptide repeat and ankyrin repeat containing 1
XM_005695541.1	EPM2AIP1	42.3355	53.8192	40.635	16.2525	17.7292	13.3595	11.1071	20.4048	10.3546	-1.53079	-1.70809	0.00234091	0.00382625	0.0391783	0.0343364	EPM2A %28laforin%29 interacting protein 1
XM_005695525.1	LOC102178950	3.12289	3.758	3.7973	-	-	-	1.55105	1.93605	1.24983	-	-1.17264	-	0.00257266	-	0.02852	transmembrane protein with metallophosphoesterase domain-like
XM_005695498.1	VOPP1	17.9223	15.1675	21.4634	7.87139	5.38213	4.37377	4.37895	3.02309	3.5891	-1.62985	-2.31132	0.00421314	0.00146493	0.0482383	0.0226532	vesicular%2C overexpressed in cancer%2C prosurvival protein 1
XM_005695475.1	JAG2	23.0657	18.2274	25.7395	45.238	50.5907	57.5118	38.6389	51.4181	44.1041	1.1938	1.00103	0.00233103	0.00652872	0.0390958	0.0449554	jagged 2
XM_005695474.1	AHNAK2	3.9927	2.11465	3.89811	11.7146	10.6178	15.5665	19.597	18.1652	19.4661	1.92137	2.51594	0.00456733	3.26e-05	0.0494479	0.00585538	AHNAK nucleoprotein 2
XM_005695472.1	GPR132	0.709199	0.382724	0.463117	-	-	-	1.61737	1.44892	1.96425	-	1.69376	-	0.00304246	-	0.0310376	G protein-coupled receptor 132
XM_005695450.1	EVL	90.3934	77.1427	107.8	-	-	-	32.6453	42.889	38.8028	-	-1.2679	-	0.00458825	-	0.0373705	Enah%2FVasp-like
XM_005695446.1	CCDC85C	1.17324	1.2663	1.02153	-	-	-	4.16837	4.98572	4.20888	-	1.94895	-	0.000277618	-	0.0117023	coiled-coil domain containing 85C
XM_005695443.1	CEP170B	10.7941	5.76506	10.2703	-	-	-	39.0018	29.5856	38.6679	-	1.99916	-	0.0015165	-	0.0228294	centrosomal protein 170B
XM_005695421.1	TRAF3	2.16675	2.07875	2.44921	-	-	-	0.438017	0.579878	0.802163	-	-1.87904	-	0.000456465	-	0.0138389	TNF receptor-associated factor 3%2C transcript variant X1
XM_005695399.1	CLMN	7.82482	12.6144	14.276	-	-	-	0.946376	1.92	1.3445	-	-3.04338	-	0.00650456	-	0.0449233	calmin %28calponin-like%2C transmembrane%29
XM_005695396.1	LOC102185401	0.157079	0.508612	0.273533	15.1285	26.5103	24.1616	27.3007	31.4072	33.5339	6.13048	6.61781	0.0033831	7.7e-05	0.0439084	0.00813975	alpha-1-antiproteinase-like
XM_005695394.1	OTUB2	3.88906	2.79834	4.23269	34.7245	49.4373	56.7485	51.5396	29.1471	43.8749	3.68972	3.5118	0.0026173	0.00452734	0.0406636	0.037082	OTU domain%2C ubiquitin aldehyde binding 2
XM_005695389.1	CHGA	15.7245	13.7444	11.8993	-	-	-	7.24556	3.50723	2.93221	-	-1.59592	-	0.006148	-	0.0434707	chromogranin A %28parathyroid secretory protein 1%29
XM_005695388.1	RIN3	39.4854	29.7758	39.9474	13.7477	12.383	13.7044	6.85473	12.2347	8.892	-1.45498	-1.96454	0.00230043	0.00179615	0.0389929	0.0244525	Ras and Rab interactor 3
XM_005695383.1	PPIP5K1	2.72131	2.33556	1.7271	7.21997	8.34434	7.66633	6.73737	7.46657	5.4543	1.77583	1.53493	0.000231411	0.00281438	0.019519	0.029821	diphosphoinositol pentakisphosphate kinase 1
XM_005695305.1	CKMT1B	7.30009	2.27145	6.98597	-	-	-	81.9072	83.9862	98.7206	-	3.99833	-	0.000117077	-	0.0089352	creatine kinase%2C mitochondrial 1B
XM_005695261.1	NPAS3	6.88112	9.25797	5.81403	1.69471	0.511728	0.698041	0.0390975	0.266194	0.60145	-2.91808	-4.59759	0.00421201	0.00243612	0.0482383	0.0279326	neuronal PAS domain protein 3
XM_005695224.1	EGLN3	26.1952	21.6742	27.5544	-	-	-	53.7673	62.8244	63.9222	-	1.25902	-	0.00067705	-	0.0164301	egl-9 family hypoxia-inducible factor 3
XM_005695183.1	ADAMTS7	74.1545	77.3966	59.7487	13.6263	17.8884	15.1641	8.43425	6.74055	7.18259	-2.17845	-3.24047	0.000593381	0.00031966	0.0246388	0.0123216	ADAM metallopeptidase with thrombospondin type 1 motif%2C 7
XM_005695172.1	MCEE	6.18198	8.54751	3.16621	-	-	-	13.7346	14.6607	15.3475	-	1.28943	-	0.00609019	-	0.0432991	methylmalonyl CoA epimerase
XM_005695166.1	STXBP6	25.1334	32.0745	24.5258	7.34429	7.0668	5.60058	3.09643	10.851	4.73666	-2.03009	-2.12912	0.00115457	0.00340844	0.0304472	0.0329199	syntaxin binding protein 6 %28amisyn%29
XM_005695140.1	EDC3	1.24429	0.96993	0.993104	-	-	-	0.597405	0.338951	0.291749	-	-1.38494	-	0.00698845	-	0.046735	enhancer of mRNA decapping 3%2C transcript variant X2
XM_005695125.1	SCAMP5	8.26021	6.25333	6.67665	1.45846	1.71494	1.23007	1.08512	1.05543	1.2302	-2.26668	-2.65226	0.000869543	0.000635408	0.0283459	0.0159151	secretory carrier membrane protein 5
XM_005695117.1	LINGO1	22.969	17.9116	16.8838	6.48945	5.1819	4.49557	3.78178	5.83101	6.19619	-1.83714	-1.86944	0.00214541	0.00230647	0.0379278	0.0273891	leucine rich repeat and Ig domain containing 1
XM_005695114.1	LOC102188259	13.9923	17.5932	13.4948	-	-	-	4.39353	7.25499	3.3665	-	-1.58609	-	0.00448942	-	0.0370122	pseudopodium-enriched atypical kinase 1-like
XM_005695084.1	TBC1D2B	56.1047	50.2448	62.5462	15.6236	13.3664	13.8729	16.9702	12.8144	7.51345	-1.97833	-2.17896	0.000314227	0.000611996	0.0207916	0.0156274	TBC1 domain family%2C member 2B
XM_005695076.1	STARD5	14.0082	13.6875	12.6818	-	-	-	45.7796	36.9448	51.4508	-	1.7325	-	0.00180163	-	0.024484	StAR-related lipid transfer %28START%29 domain containing 5
XM_005695069.1	ARNT2	0.805362	0.998014	0.688232	0.317596	0.187441	0.284095	0.0572841	0.0650029	0.0419629	-1.65874	-3.92311	0.00448255	0.00101976	0.0492329	0.0193468	aryl-hydrocarbon receptor nuclear translocator 2%2C transcript variant X3
XM_005695052.1	CTSH	15.2385	18.7397	15.439	189.606	227.334	274.177	232.324	229.666	316.597	3.80584	3.97777	0.000946292	0.00104665	0.0289434	0.019593	cathepsin H
XM_005695048.1	BNC1	3.11548	1.64698	3.2662	16.986	27.2832	27.8764	26.8429	21.7768	19.1268	3.16768	3.07692	0.00392616	0.00101639	0.046951	0.0193349	basonuclin 1
XM_005695046.1	SH3GL3	0.971374	1.20374	1.31563	-	-	-	0.103638	0.117603	0.151839	-	-3.22598	-	0.000530626	-	0.0146803	SH3-domain GRB2-like 3%2C transcript variant X2
XM_005695045.1	SH3GL3	1.81509	1.39932	1.74969	-	-	-	0.74696	0.635707	0.820767	-	-1.17178	-	0.00276051	-	0.029526	SH3-domain GRB2-like 3%2C transcript variant X1
XM_005695014.1	HOMER2	17.6027	15.0358	18.4293	-	-	-	43.9676	46.4796	50.7809	-	1.46754	-	0.000177346	-	0.0103278	homer homolog 2 %28Drosophila%29
XM_005694998.1	ZSCAN2	19.1793	16.6718	21.8593	6.31313	5.48074	6.75087	3.46026	3.95896	2.66047	-1.63782	-2.51738	0.0010703	0.000505391	0.0297408	0.0143262	zinc finger and SCAN domain containing 2
XM_005694991.1	FES	37.5411	30.0224	31.6904	-	-	-	11.7758	19.323	15.2656	-	-1.09811	-	0.00503014	-	0.0392118	feline sarcoma oncogene
XM_005694971.1	TICRR	3.76576	3.73928	4.89196	-	-	-	1.95264	1.96956	1.51515	-	-1.18901	-	0.00472239	-	0.038063	TOPBP1-interacting checkpoint and replication regulator
XM_005694970.1	RHCG	0.04824	0.138843	0.210009	-	-	-	9.44961	9.51395	7.90626	-	6.08037	-	7.49e-05	-	0.00813514	Rh family%2C C glycoprotein
XM_005694969.1	FANCI	10.1693	13.4444	12.5711	-	-	-	4.03473	6.551	5.34524	-	-1.18355	-	0.00520068	-	0.040019	Fanconi anemia%2C complementation group I
XM_005694966.1	ACAN	0.253083	0.192221	0.42847	-	-	-	1.80914	1.11838	1.40439	-	2.30967	-	0.0056032	-	0.0416013	aggrecan
XM_005694957.1	SLCO3A1	6.14454	5.58631	6.18137	-	-	-	15.4282	20.719	14.1929	-	1.49076	-	0.00578481	-	0.0420581	solute carrier organic anion transporter family%2C member 3A1
XM_005694948.1	ADAMTS17	45.1841	42.9869	36.6095	14.4287	14.4845	16.648	8.17696	10.8524	10.0767	-1.45351	-2.10001	0.000589323	0.000290436	0.0246388	0.0118959	ADAM metallopeptidase with thrombospondin type 1 motif%2C 17
XM_005694936.1	SV2B	1.01921	1.35293	0.841512	-	-	-	0.0337476	0.038295	0.049443	-	-4.72536	-	0.00234838	-	0.0275279	synaptic vesicle glycoprotein 2B
XM_005694931.1	MCTP2	0.214682	0.154473	0.20769	0.946656	0.642413	0.840605	0.64134	0.727758	0.738269	2.07451	1.86919	0.00247745	0.000145796	0.0398438	0.00956479	multiple C2 domains%2C transmembrane 2%2C transcript variant X1
XM_005694924.1	CERS3	4.14305	1.27761	3.2488	-	-	-	8.40136	9.08477	7.92823	-	1.55163	-	0.00358906	-	0.0334148	ceramide synthase 3
XM_005694917.1	ATP10A	1.71016	2.15343	0.661784	-	-	-	4.85804	5.84909	5.313	-	1.82378	-	0.00189969	-	0.0250962	ATPase%2C class V%2C type 10A
XM_005694915.1	LOC102190462	0.561991	0.849191	0.782908	0.217593	0.201803	0.214104	-	-	-	-1.79221	-	0.00392426	-	0.046951	-	GPN-loop GTPase 1-like%2C transcript variant X1
XM_005694906.1	LPCAT1	40.6851	25.8818	38.6874	-	-	-	9.2879	8.95849	9.44021	-	-1.92662	-	0.00508094	-	0.0394143	lysophosphatidylcholine acyltransferase 1
XM_005694895.1	AHRR	8.18576	5.49733	7.39873	2.49022	1.04978	0.891019	1.27261	2.54839	0.8774	-2.25029	-2.16576	0.00421955	0.00443498	0.0482569	0.0368204	aryl-hydrocarbon receptor repressor
XM_005694878.1	FBXL7	35.6402	31.3642	23.4122	-	-	-	7.33834	8.63556	6.93522	-	-1.98067	-	0.00340627	-	0.0329199	F-box and leucine-rich repeat protein 7
XM_005694875.1	BASP1	74.4342	85.4625	101.894	28.5897	30.9657	27.3334	19.5783	24.2706	31.9745	-1.59117	-1.7877	0.0019281	0.00210314	0.0368976	0.0263188	brain abundant%2C membrane attached signal protein 1
XM_005694869.1	ADCY2	22.3666	26.3901	28.5254	-	-	-	9.51829	15.8966	10.0834	-	-1.12239	-	0.00691136	-	0.0464779	adenylate cyclase 2 %28brain%29
XM_005694864.1	SEMA5A	35.0582	38.2104	35.1987	18.3611	17.6189	14.7873	12.9396	17.2071	11.3944	-1.09529	-1.38465	0.000211877	0.000381853	0.0186167	0.0128588	sema domain%2C seven thrombospondin repeats %28type 1 and type 1-like%29%2C transmembrane domain %28TM%29 and short cytoplasmic domain%2C %28semaphorin%29 5A
XM_005694833.1	CDH6	38.5559	60.2472	70.0213	0.57582	1.50198	1.09777	0.178509	0.567173	0.183071	-5.73237	-7.50601	0.00403776	0.00383884	0.0475213	0.0343364	cadherin 6%2C type 2%2C K-cadherin %28fetal kidney%29
XM_005694783.1	NUP155	1.45237	1.51297	1.39668	-	-	-	0.582824	0.921176	0.564173	-	-1.07664	-	0.00318682	-	0.0318829	nucleoporin 155kDa%2C transcript variant X1
XM_005694781.1	GDNF	0.891028	1.23805	1.25734	-	-	-	0.560562	0.301308	0.410634	-	-1.41209	-	0.00745832	-	0.0481678	glial cell derived neurotrophic factor
XM_005694774.1	DAB2	70.7709	75.3126	69.131	28.2956	25.4954	17.7688	24.7268	41.5869	26.5539	-1.58855	-1.21253	0.000195061	0.00195688	0.0183826	0.025443	Dab%2C mitogen-responsive phosphoprotein%2C homolog 2 %28Drosophila%29
XM_005694770.1	PTGER4	2.74021	3.0834	2.81734	12.3026	11.9594	11.7722	16.9911	25.1886	20.8948	2.06011	2.86779	1.05e-06	0.00156326	0.00412309	0.0231388	prostaglandin E receptor 4 %28subtype EP4%29
XM_005694765.1	LOC102185312	6.01652	6.16685	4.41229	1.44616	1.68559	1.33644	0.736698	1.13295	0.582265	-1.89305	-2.75882	0.00209912	0.00128681	0.037851	0.0213794	chondroitin sulfate proteoglycan 4-like
XM_005694741.1	LOC102177002	0.26447	0.0317162	0.345405	-	-	-	2.20092	2.40143	2.94548	-	3.55634	-	0.000676146	-	0.0164301	serine%2Fthreonine-protein kinase NIM1-like
XM_005694710.1	ESM1	0.793593	0.999291	0.863712	10.8503	16.5638	16.8176	3.81017	2.48605	3.27955	4.05743	1.84981	0.00206753	0.00407262	0.0377607	0.0354311	endothelial cell-specific molecule 1%2C transcript variant X1
XM_005694673.1	ELOVL7	2.84773	3.0248	2.57393	12.8898	15.3874	11.3916	-	-	-	2.23158	-	0.000890832	-	0.0285374	-	ELOVL fatty acid elongase 7
XM_005694596.1	OCLN	4.59539	2.69817	4.28922	9.53678	9.90086	11.2047	-	-	-	1.40354	-	0.0012123	-	0.0308781	-	occludin
XM_005694580.1	NEURL1B	19.9468	17.0104	20.759	-	-	-	5.41717	11.6356	5.05485	-	-1.38443	-	0.00801981	-	0.0499575	neuralized homolog 1B %28Drosophila%29
XM_005694579.1	SH3PXD2B	75.4242	62.4961	64.7051	27.1078	22.0885	20.5447	20.3384	16.0145	10.6897	-1.53874	-2.10678	0.000575625	0.000440657	0.0243248	0.0136353	SH3 and PX domains 2B
XM_005694578.1	STK10	24.7559	22.9062	21.5383	12.0269	9.39653	7.19009	9.29167	11.795	7.82617	-1.27409	-1.25907	0.00129225	0.000833164	0.0309825	0.0178632	serine%2Fthreonine kinase 10
XM_005694574.1	DOCK2	2.68961	2.1772	2.62059	1.02277	0.905438	0.426947	-	-	-	-1.66864	-	0.00214102	-	0.0379278	-	dedicator of cytokinesis 2
XM_005694572.1	MAP1B	0.829473	0.90123	0.541658	-	-	-	0.0876136	0.135572	0.110857	-	-2.76609	-	0.00430045	-	0.0363315	microtubule-associated protein 1B%2C transcript variant X3
XM_005694545.1	MSX2	2.8519	2.05206	4.88612	53.4292	68.8776	85.9564	54.4165	53.2283	64.6467	4.41094	4.13739	0.00217516	0.000129547	0.0379278	0.00937708	msh homeobox 2
XM_005694534.1	ATP6V0E1	58.8463	58.148	71.1676	-	-	-	228.467	208.485	208.592	-	1.77854	-	4.19e-05	-	0.00639256	ATPase%2C H%2B transporting%2C lysosomal 9kDa%2C V0 subunit e1
XM_005694531.1	ERGIC1	39.336	31.0634	33.7285	15.0531	14.4662	15.3479	11.7572	16.9835	16.1363	-1.21463	-1.21431	0.00128847	0.00251407	0.0309825	0.0281595	endoplasmic reticulum-golgi intermediate compartment %28ERGIC%29 1%2C transcript variant X2
XM_005694528.1	UBTD2	41.0804	54.4544	41.491	-	-	-	8.94127	17.9048	13.806	-	-1.75305	-	0.00324286	-	0.0320446	ubiquitin domain containing 2
XM_005694522.1	GABRP	2.84456	1.03439	4.4208	14.9513	21.335	22.1402	-	-	-	2.81548	-	0.00251202	-	0.0401311	-	gamma-aminobutyric acid %28GABA%29 A receptor%2C pi
XM_005694520.1	KCNMB1	0.199314	0.88917	0.242955	-	-	-	4.36364	4.90818	4.62657	-	3.38386	-	0.000105059	-	0.00880351	potassium large conductance calcium-activated channel%2C subfamily M%2C beta member 1%2C transcript variant X1
XM_005694493.1	SOX9	3.03411	4.28837	2.26436	28.9492	35.7981	35.6065	30.3832	32.1157	28.812	3.3879	3.25166	0.000202148	1.71e-05	0.01843	0.00434117	SRY %28sex determining region Y%29-box 9
XM_005694489.1	SDK2	13.1613	12.2349	14.4718	6.15941	5.63443	6.01099	3.80641	5.11496	3.2653	-1.16296	-1.70993	0.000385651	0.000408748	0.0216375	0.0131355	sidekick cell adhesion molecule 2
XM_005694488.1	KIF19	2.32044	1.69496	2.72445	-	-	-	0.708962	0.612946	0.840842	-	-1.63985	-	0.00762424	-	0.0486091	kinesin family member 19
XM_005694472.1	MAP2K6	11.5608	10.8836	13.3472	-	-	-	4.35239	6.49266	6.59155	-	-1.0375	-	0.00411569	-	0.035609	mitogen-activated protein kinase kinase 6
XM_005694451.1	FADS6	19.4261	9.05609	16.6758	57.7348	75.3238	85.3877	81.883	57.7373	90.9683	2.27423	2.35227	0.00262028	0.00400533	0.0406636	0.035126	fatty acid desaturase 6
XM_005694448.1	CDR2L	20.0209	15.4667	19.6141	-	-	-	5.60602	9.47786	6.92736	-	-1.32385	-	0.00394324	-	0.0348695	cerebellar degeneration-related protein 2-like
XM_005694439.1	UNK	18.6974	14.2721	16.9398	-	-	-	6.80621	9.37604	8.26866	-	-1.02942	-	0.0046521	-	0.0376956	unkempt homolog %28Drosophila%29
XM_005694436.1	TRIM47	12.0736	11.1504	8.72411	27.9516	31.8455	39.1214	-	-	-	1.63051	-	0.00285258	-	0.0415629	-	tripartite motif containing 47
XM_005694434.1	FBF1	16.0521	12.83	14.6751	-	-	-	4.70744	5.64902	7.76651	-	-1.26509	-	0.00285291	-	0.0301205	Fas %28TNFRSF6%29 binding factor 1
XM_005694428.1	RNF157	24.4336	18.9052	22.7741	7.20131	9.50845	10.5169	4.88791	7.06117	5.54992	-1.27991	-1.91766	0.00245816	0.000772397	0.039731	0.0175036	ring finger protein 157
XM_005694425.1	SPHK1	1.91261	2.62339	4.4234	-	-	-	16.529	17.5188	16.2703	-	2.4896	-	8.01e-05	-	0.00822712	sphingosine kinase 1
XM_005694421.1	ST6GALNAC2	3.79048	4.01319	4.43185	16.7202	21.7778	23.2599	33.2257	38.5287	39.8034	2.33555	3.18864	0.00115006	8.16e-05	0.0304079	0.0083165	ST6 %28alpha-N-acetyl-neuraminyl-2%2C3-beta-galactosyl-1%2C3%29-N-acetylgalactosaminide alpha-2%2C6-sialyltransferase 2
XM_005694416.1	TMC6	5.27199	3.00518	5.00754	-	-	-	11.6697	9.10162	10.2823	-	1.22499	-	0.00454942	-	0.0371396	transmembrane channel-like 6
XM_005694407.1	CBX2	41.9699	31.6392	37.0405	-	-	-	13.6716	13.8938	8.76813	-	-1.60662	-	0.00192868	-	0.0252843	chromobox homolog 2
XM_005694405.1	TBC1D16	25.4565	22.2943	26.6609	14.9955	9.04658	11.0902	5.29564	6.54184	4.56696	-1.08273	-2.18144	0.00385104	0.000170304	0.0463218	0.0100565	TBC1 domain family%2C member 16
XM_005694403.1	NPTX1	4.84279	3.77156	4.51419	-	-	-	0.547084	1.80032	0.72137	-	-2.09697	-	0.00265001	-	0.028956	neuronal pentraxin I
XM_005694400.1	LOC102184092	2.629	4.11234	3.4435	10.6437	8.12695	10.1682	6.82701	9.49059	9.05336	1.50658	1.31675	0.00210207	0.00552251	0.037851	0.0412572	serine%2Fthreonine-protein kinase LMTK1-like
XM_005694397.1	BAHCC1	8.38233	9.12345	9.37835	-	-	-	3.63766	4.79011	2.68461	-	-1.27459	-	0.0014911	-	0.0226736	BAH domain and coiled-coil containing 1
XM_005694390.1	SLC25A10	7.99939	7.36755	7.4525	13.5503	16.7321	18.5901	-	-	-	1.09876	-	0.00426193	-	0.0483633	-	solute carrier family 25 %28mitochondrial carrier%3B dicarboxylate transporter%29%2C member 10
XM_005694385.1	NOTUM	4.92942	4.24468	3.65873	-	-	-	10.3203	9.77381	9.6064	-	1.21065	-	0.000189999	-	0.0105595	notum pectinacetylesterase homolog %28Drosophila%29
XM_005694370.1	B3GNTL1	4.86263	5.66665	6.76491	-	-	-	1.37033	2.53403	1.18971	-	-1.7634	-	0.00422957	-	0.03618	UDP-GlcNAc:betaGal beta-1%2C3-N-acetylglucosaminyltransferase-like 1
XM_005694363.1	ACE	1.53908	1.12397	0.780034	-	-	-	8.60259	11.3637	9.84041	-	3.11386	-	0.000446301	-	0.0136702	angiotensin I converting enzyme
XM_005694362.1	LOC102171650	1.30951	0.807639	1.14017	17.2023	12.0915	17.1048	23.5319	21.8106	19.0803	3.83233	4.30582	0.00105578	9.78e-05	0.0297408	0.00871972	cytochrome b561-like
XM_005694361.1	MRC2	219.564	189.395	201.147	-	-	-	99.2356	67.7846	68.206	-	-1.37501	-	0.000783926	-	0.0175036	mannose receptor%2C C type 2
XM_005694346.1	C1QL1	3.30042	2.30495	2.95815	-	-	-	0.466055	1.37502	0.751089	-	-1.72405	-	0.00739306	-	0.0480396	complement component 1%2C q subcomponent-like 1
XM_005694340.1	FAM171A2	33.6284	30.7476	32.9195	12.6786	12.4258	11.6791	8.47418	7.69283	7.1225	-1.40332	-2.06269	2.53e-05	1.31e-05	0.0108542	0.00395763	family with sequence similarity 171%2C member A2
XM_005694330.1	RND2	8.43569	6.06983	7.19245	-	-	-	2.85693	2.36467	2.56062	-	-1.47931	-	0.00266283	-	0.029029	Rho family GTPase 2
XM_005694327.1	WNK4	3.09823	1.56714	2.56404	-	-	-	15.1402	11.4312	10.8319	-	2.37122	-	0.00209785	-	0.0263188	WNK lysine deficient protein kinase 4
XM_005694317.1	FKBP10	266.278	215.974	277.264	133.737	122.363	89.2052	94.1876	99.3516	103.728	-1.13721	-1.35332	0.00394841	0.00127425	0.0470582	0.0212706	FK506 binding protein 10%2C 65 kDa
XM_005694316.1	LEPREL4	139.152	122.315	141.096	48.6904	58.3139	46.2378	33.9361	60.7158	67.6523	-1.3934	-1.31052	0.000289788	0.00252656	0.0201731	0.0282366	leprecan-like 4
XM_005694314.1	KRT16	0.125456	0.135406	0.382314	-	-	-	6.38474	4.57942	7.23623	-	4.82261	-	0.00175247	-	0.0242539	keratin 16
XM_005694312.1	LOC102179881	0.550383	1.14407	1.97009	965.274	1422.26	1669.36	-	-	-	10.1125	-	0.00280739	-	0.0413223	-	keratin%2C type I microfibrillar%2C 47.6 kDa-like
XM_005694305.1	RAPGEFL1	8.88085	4.28741	6.34456	-	-	-	28.2434	21.9588	21.7573	-	1.88276	-	0.00223253	-	0.0270191	Rap guanine nucleotide exchange factor %28GEF%29-like 1
XM_005694303.1	NR1D1	2.10716	1.51619	2.34838	-	-	-	16.6725	18.8731	13.5472	-	3.03929	-	0.000780105	-	0.0175036	nuclear receptor subfamily 1%2C group D%2C member 1
XM_005694297.1	STAC2	0.698513	0.402088	0.547367	2.56929	3.85646	3.29318	3.95734	4.75696	4.59404	2.56011	3.01357	0.00214775	0.000114071	0.0379278	0.00892294	SH3 and cysteine rich domain 2
XM_005694296.1	PLXDC1	8.93379	8.14414	4.05971	-	-	-	19.3444	24.1228	25.6121	-	1.70844	-	0.00272443	-	0.0294065	plexin domain containing 1
XM_005694291.1	TBKBP1	13.1925	14.7429	14.9172	-	-	-	3.89565	6.13792	6.77502	-	-1.35018	-	0.00108909	-	0.0197969	TBK1 binding protein 1
XM_005694288.1	SP6	2.54779	0.595805	1.331	53.0221	79.8803	96.9432	64.4647	51.5666	46.7749	5.68276	5.18525	0.00420451	0.000576632	0.0482383	0.0153034	Sp6 transcription factor
XM_005694282.1	HOXB2	18.3897	13.4788	19.7908	-	-	-	4.16783	6.84523	5.78483	-	-1.62075	-	0.00491344	-	0.0387399	homeobox B2
XM_005694280.1	HOXB5	4.56888	4.27375	5.56928	-	-	-	1.75488	1.86688	1.76759	-	-1.41908	-	0.00157611	-	0.0232432	homeobox B5
XM_005694272.1	ZNF652	4.64584	6.70782	5.72717	1.92939	2.05091	1.18289	-	-	-	-1.72605	-	0.00371954	-	0.0457716	-	zinc finger protein 652
XM_005694271.1	NGFR	62.4881	62.0162	58.5346	18.8003	14.8415	14.645	3.88549	11.0856	8.09157	-1.92245	-2.98852	1.67e-05	2.56e-05	0.0108542	0.00530395	nerve growth factor receptor
XM_005694268.1	DLX4	0.942084	0.254201	0.358863	-	-	-	15.4916	12.8956	19.176	-	4.93472	-	0.00111973	-	0.0199608	distal-less homeobox 4
XM_005694267.1	DLX3	3.11389	0.99266	3.26033	138.916	232.725	252.091	206.92	164.58	196.437	6.40373	6.26853	0.00418652	0.000126207	0.0482239	0.00936439	distal-less homeobox 3
XM_005694264.1	XYLT2	44.4522	31.5712	36.9754	-	-	-	14.0071	16.8037	14.3692	-	-1.32255	-	0.00414747	-	0.035752	xylosyltransferase II
XM_005694261.1	EPN3	1.89889	0.699053	1.11504	-	-	-	17.5553	12.1257	13.854	-	3.55152	-	0.00126547	-	0.0212059	epsin 3
XM_005694260.1	CACNA1G	53.2194	51.8723	65.4747	8.96331	9.38705	8.58427	1.99816	4.54898	3.61359	-2.6628	-4.06926	0.000381569	0.00026101	0.0216375	0.0115957	calcium channel%2C voltage-dependent%2C T type%2C alpha 1G subunit
XM_005694254.1	NT5M	36.5858	25.74	33.7424	-	-	-	12.838	14.5678	16.6482	-	-1.12479	-	0.00719594	-	0.0473229	5%27%2C3%27-nucleotidase%2C mitochondrial
XM_005694243.1	LOC102180255	1.30539	1.18976	0.681953	4.80153	4.60937	3.31548	3.92758	5.49989	4.34627	2.00204	2.11613	0.00322405	0.00224165	0.0435005	0.0271064	RING finger protein 112-like
XM_005694236.1	CENPV	18.8727	13.0982	17.1314	-	-	-	7.06894	4.66702	5.46073	-	-1.51366	-	0.00454237	-	0.0371396	centromere protein V
XM_005694232.1	HS3ST3A1	8.87082	6.79664	8.65339	1.03356	2.65449	1.72107	1.02532	0.984482	0.808865	-2.16873	-3.10911	0.00146018	0.000411671	0.0323712	0.0131652	heparan sulfate %28glucosamine%29 3-O-sulfotransferase 3A1
XM_005694231.1	ARHGAP44	1.87729	1.65097	2.03408	0.847995	0.561759	0.2384	0.761114	0.727302	0.32279	-1.75484	-1.61874	0.00331196	0.00222915	0.0438233	0.0270191	Rho GTPase activating protein 44
XM_005694228.1	SHISA6	0.205033	0.0737649	0.0892596	-	-	-	2.36255	1.34045	2.30755	-	4.0295	-	0.00491856	-	0.0387399	shisa family member 6
XM_005694212.1	ALOX15B	0.262884	0.141867	0.658058	27.259	29.5289	24.0679	33.8572	26.3171	37.7227	6.2494	6.52531	7.51e-05	0.000650817	0.0145856	0.0161248	arachidonate 15-lipoxygenase%2C type B
XM_005694210.1	CHD3	151.114	131.226	172.687	67.702	76.0545	76.8487	51.7723	56.5508	48.5558	-1.04449	-1.5363	0.00316874	0.00123389	0.0433473	0.0210834	chromodomain helicase DNA binding protein 3
XM_005694209.1	TMEM88	36.5854	41.4935	33.6996	-	-	-	8.99683	18.8382	15.221	-	-1.37635	-	0.00334228	-	0.0324875	transmembrane protein 88
XM_005694207.1	EFNB3	11.0553	10.5553	13.081	-	-	-	4.08293	2.85707	2.64197	-	-1.85619	-	0.00072221	-	0.0170586	ephrin-B3
XM_005694202.1	NLGN2	36.7434	34.836	41.1485	-	-	-	16.8099	18.0269	12.765	-	-1.24376	-	0.0009019	-	0.0184899	neuroligin 2
XM_005694193.1	DVL2	30.1427	27.143	31.981	-	-	-	14.353	13.2766	11.3114	-	-1.19684	-	0.000549219	-	0.0148825	dishevelled segment polarity protein 2
XM_005694192.1	DLG4	12.6229	10.1208	13.1887	-	-	-	3.14568	2.5871	3.12882	-	-2.01965	-	0.000714756	-	0.0170043	discs%2C large homolog 4 %28Drosophila%29
XM_005694191.1	SLC16A11	8.50623	2.15726	5.58504	-	-	-	34.8812	29.1732	40.4122	-	2.68466	-	0.00139599	-	0.0220803	solute carrier family 16%2C member 11
XM_005694190.1	ALOX12	3.83397	2.83533	3.49273	-	-	-	18.2371	11.9138	14.533	-	2.13657	-	0.00345239	-	0.0330366	arachidonate 12-lipoxygenase
XM_005694185.1	CHRNE	2.20011	2.46256	1.91561	-	-	-	4.69472	5.86004	4.25585	-	1.17085	-	0.00552752	-	0.0412729	cholinergic receptor%2C nicotinic%2C epsilon %28muscle%29
XM_005694174.1	SPNS2	12.8553	8.90184	10.531	-	-	-	43.2044	37.2025	41.6152	-	1.91807	-	0.000149359	-	0.00956479	spinster homolog 2 %28Drosophila%29
XM_005694166.1	TRPV3	0.0373997	0.107643	0.0651268	5.9732	8.59503	10.3657	7.99052	9.02646	8.07635	6.89041	6.89961	0.00295986	1.53e-05	0.0421875	0.00411054	transient receptor potential cation channel%2C subfamily V%2C member 3
XM_005694165.1	ZNF750	14.9263	5.17197	12.3037	-	-	-	65.0846	61.9898	63.5982	-	2.55694	-	6.54e-05	-	0.00781083	zinc finger protein 750
XM_005694162.1	CHAD	4.1423	1.68466	1.35902	-	-	-	17.1209	23.1564	19.5516	-	3.05758	-	0.000862814	-	0.0181961	chondroadherin
XM_005694161.1	GSG2	4.72344	5.22489	5.89272	2.35427	2.9429	2.55154	2.40319	2.72701	1.76043	-1.01314	-1.20096	0.00218583	0.00251204	0.0379491	0.0281595	germ cell associated 2 %28haspin%29
XM_005694128.1	ITGB4	0.293098	0.297736	0.495381	3.18751	2.66214	2.80799	3.62564	5.24135	4.49931	2.99467	3.62122	0.000120375	0.00097023	0.0162008	0.0190974	integrin%2C beta 4%2C transcript variant X1
XM_005694109.1	RHBDF2	3.52363	1.96777	2.47269	-	-	-	9.94851	9.94236	10.2841	-	1.92177	-	9.65e-05	-	0.00871972	rhomboid 5 homolog 2 %28Drosophila%29
XM_005694101.1	SEC14L1	6.50242	8.30669	6.05515	2.69264	2.71576	2.48388	2.83811	2.69009	3.76671	-1.40252	-1.16652	0.00334651	0.00731822	0.0438598	0.0476845	SEC14-like 1 %28S. cerevisiae%29%2C transcript variant X2
XM_005694099.1	2015-09-09	229.21	178.589	262.614	-	-	-	76.5116	90.9789	74.0147	-	-1.473	-	0.00462002	-	0.0375429	septin 9
XM_005694098.1	SYNGR2	33.5485	34.649	28.155	82.4798	92.0114	114.508	96.888	105.912	104.174	1.58467	1.67172	0.00270451	3.31e-05	0.0409149	0.00585538	synaptogyrin 2
XM_005694094.1	BIRC5	45.2997	39.5476	48.6465	-	-	-	21.9402	20.1897	20.23	-	-1.09808	-	0.000952354	-	0.018903	baculoviral IAP repeat containing 5
XM_005694083.1	C1QTNF1	36.6641	29.391	44.0621	-	-	-	77.1784	79.7356	72.9167	-	1.06153	-	0.00103724	-	0.0195013	C1q and tumor necrosis factor related protein 1
XM_005694076.1	RNF213	4.21458	3.71311	3.2169	1.93268	1.74279	1.53295	-	-	-	-1.09742	-	0.00310172	-	0.0429915	-	ring finger protein 213
XM_005694064.1	ARL16	13.7503	11.6485	10.4388	-	-	-	3.96755	3.46887	3.38284	-	-1.72787	-	0.00106435	-	0.0197288	ADP-ribosylation factor-like 16
XM_005694054.1	SIRT7	9.7965	8.056	8.99387	-	-	-	22.2055	25.8511	28.3138	-	1.50829	-	0.000861653	-	0.0181961	sirtuin 7
XM_005694025.1	WDR45B	2.91374	2.54813	2.81016	0.867804	0.925559	1.02467	0.602618	1.2211	0.252253	-1.55355	-1.99445	0.000103726	0.00243361	0.0156871	0.0279326	WD repeat domain 45B%2C transcript variant X2
XM_005693994.1	SMARCD2	0.521748	0.616761	0.84366	-	-	-	1.82507	2.76132	2.38552	-	1.81447	-	0.00448046	-	0.0369599	SWI%2FSNF related%2C matrix associated%2C actin dependent regulator of chromatin%2C subfamily d%2C member 2%2C transcript variant X1
XM_005693979.1	DCAF7	67.2843	60.9071	67.0992	-	-	-	31.4172	33.776	25.0088	-	-1.11439	-	0.000475115	-	0.0139735	DDB1 and CUL4 associated factor 7
XM_005693944.1	KIF18B	16.1436	11.3891	14.4952	-	-	-	7.02416	5.84055	5.92174	-	-1.16166	-	0.00584335	-	0.0423158	kinesin family member 18B
XM_005693909.1	CD300LG	0.335953	0.0906497	0.219382	-	-	-	0.96778	1.14394	0.915711	-	2.22852	-	0.00130887	-	0.021544	CD300 molecule-like family member g%2C transcript variant X3
XM_005693899.1	ETV4	2.25952	1.19546	2.14092	-	-	-	7.40239	8.54465	6.31072	-	1.99187	-	0.00158127	-	0.0232707	ets variant 4%2C transcript variant X1
XM_005693897.1	ARL4D	8.52765	7.33201	6.6069	23.504	26.4696	29.8038	27.4108	28.1907	35.4822	1.8282	2.01941	0.000554638	0.000963416	0.0240885	0.0190426	ADP-ribosylation factor-like 4D
XM_005693860.1	CNTNAP1	35.4718	27.2123	34.3574	6.8841	7.68366	4.50462	3.55864	1.9037	1.68824	-2.34712	-3.76247	0.000706991	0.0003508	0.0259612	0.0125544	contactin associated protein 1
XM_005693825.1	JUP	3.39728	1.89884	3.24847	11.8324	15.3034	18.4897	19.3401	13.518	19.7575	2.41676	2.62241	0.00335967	0.00208025	0.0438598	0.0262523	junction plakoglobin%2C transcript variant X1
XM_005693822.1	LOC102178766	87.6802	11.5697	53.2479	-	-	-	206.129	195.344	273.429	-	2.14589	-	0.00610268	-	0.0433519	keratin%2C type I cytoskeletal 19-like%2C transcript variant X2
XM_005693818.1	KRT14	0.881463	0.0792812	1.15122	220.769	292.535	280.563	356.18	305.666	314.781	8.55417	8.85308	0.000286707	3.1e-05	0.0201731	0.00585538	keratin 14%2C transcript variant X1
XM_005693814.1	LOC102176997	7.06688	0.968556	5.80143	165.082	239.503	266.859	282.873	331.989	375.375	5.60068	6.16119	0.00197738	0.000263209	0.0373115	0.0115986	keratin%2C type I cytoskeletal 42-like
XM_005693813.1	LOC102176457	0.451462	1.09636	1.76887	1815.93	2101.25	2898.07	2930.41	1748.6	2735.36	11.0048	11.1264	0.00217782	0.00250659	0.0379278	0.0281595	keratin%2C type I cuticular Ha4-like
XM_005693810.1	KRT35	0.0556398	0.840739	3.77869	-	-	-	1592.4	1075.99	1251.27	-	9.71152	-	0.00100142	-	0.0192983	keratin 35
XM_005693799.1	KRTAP3-1	3.3186	5.10137	4.85955	-	-	-	10745.6	7119.61	11428	-	11.1071	-	0.00187237	-	0.0248924	keratin associated protein 3-1
XM_005693797.1	LOC102170546	0.257891	1.20616	1.12271	-	-	-	2565.62	1348.81	2722.95	-	11.3253	-	0.0070146	-	0.0467596	keratin-associated protein 3-3-like
XM_005693796.1	LOC102170264	0.260007	0.28063	0.679154	-	-	-	1545.69	790.717	1609.17	-	11.6594	-	0.00748246	-	0.0482225	keratin-associated protein 3-3-like
XM_005693794.1	KRT23	0.114222	0.0821876	0.298354	88.8915	115.305	146.539	114.725	88.6768	148.437	9.46943	9.47396	0.00218368	0.00248364	0.0379491	0.0280067	keratin 23 %28histone deacetylase inducible%29
XM_005693791.1	KRT28	0.0571797	0.164573	0.647212	-	-	-	112.173	155.698	172.99	-	8.98681	-	0.00125927	-	0.0212059	keratin 28
XM_005693790.1	KRT27	0.527634	1.3077	5.20657	1691.46	2264.65	2607.22	3201.08	2806	3457.81	9.86425	10.3924	0.00121588	7.66e-05	0.0308781	0.00813975	keratin 27
XM_005693788.1	KRT25	1.77943	2.76081	6.43938	2152.2	3102.8	3398.01	4152.28	3652.96	3885.96	9.62223	10.0564	0.00155785	1.12e-05	0.033494	0.00369288	keratin 25
XM_005693787.1	KRT24	0.205476	0.443546	0.134179	-	-	-	0.838546	0.895564	1.01174	-	1.8098	-	0.00356274	-	0.0333237	keratin 24
XM_005693782.1	IGFBP4	531.055	452.242	517.97	-	-	-	178.283	247.351	203.953	-	-1.2537	-	0.000780553	-	0.0175036	insulin-like growth factor binding protein 4
XM_005693779.1	RARA	2.83097	2.38821	2.46488	-	-	-	1.17172	0.531842	0.652332	-	-1.70559	-	0.00175552	-	0.0242724	retinoic acid receptor%2C alpha%2C transcript variant X3
XM_005693776.1	CDC6	11.3363	10.5072	13.3166	1.71104	5.27812	2.78163	3.2472	4.48031	4.10867	-1.84739	-1.57074	0.00326693	0.00102975	0.0437723	0.0194846	cell division cycle 6
XM_005693770.1	MSL1	2.4152	2.96565	2.33145	-	-	-	0.882286	0.94396	0.775572	-	-1.56764	-	0.00114357	-	0.0202078	male-specific lethal 1 homolog %28Drosophila%29%2C transcript variant X1
XM_005693764.1	GSDMA	0.203496	0.109818	0.398658	172.402	219.355	282.149	275.91	185.868	292.545	9.88651	10.0491	0.00212479	0.00162365	0.0379278	0.0234533	gasdermin A
XM_005693757.1	GRB7	0.26398	0.189945	0.0766145	-	-	-	1.01393	1.82171	1.60928	-	3.06662	-	0.00623331	-	0.0438404	growth factor receptor-bound protein 7%2C transcript variant X3
XM_005693729.1	PIP4K2B	0.32972	0.369052	0.33493	0.0709231	0.0328884	0.122126	-	-	-	-2.19383	-	0.000713904	-	0.0259782	-	phosphatidylinositol-5-phosphate 4-kinase%2C type II%2C beta%2C transcript variant X2
XM_005693728.1	PIP4K2B	1.50525	1.67747	1.93393	0.746275	0.74156	0.402123	0.528802	0.940087	0.413193	-1.43685	-1.44287	0.00311133	0.00600565	0.0429915	0.0428993	phosphatidylinositol-5-phosphate 4-kinase%2C type II%2C beta%2C transcript variant X1
XM_005693724.1	PCGF2	8.3638	7.17756	7.74991	-	-	-	4.78925	3.55338	3.29242	-	-1.00131	-	0.00249853	-	0.0281248	polycomb group ring finger 2%2C transcript variant X2
XM_005693694.1	GNGT2	0.258827	0.310395	0.150238	0.626332	0.813237	0.657377	-	-	-	1.5433	-	0.00354304	-	0.0449304	-	guanine nucleotide binding protein %28G protein%29%2C gamma transducing activity polypeptide 2%2C transcript variant X2
XM_005693692.1	ABI3	1.97414	1.73614	1.00266	3.76866	3.69211	3.49934	3.73861	4.89963	5.09163	1.21756	1.54262	0.00235185	0.00426306	0.0392837	0.0362424	ABI family%2C member 3
XM_005693666.1	ACSF2	27.8907	25.9468	27.6738	57.6387	52.8834	63.523	67.9652	74.4111	76.5889	1.09439	1.42563	0.000600708	6.68e-05	0.0246388	0.00781083	acyl-CoA synthetase family member 2
XM_005693662.1	ABCC3	1.29397	1.19708	1.36806	8.71383	13.0765	14.3313	17.4484	14.3813	13.4448	3.22652	3.55236	0.00321687	0.000336755	0.0435005	0.0124319	ATP-binding cassette%2C sub-family C %28CFTR%2FMRP%29%2C member 3
XM_005693651.1	WFIKKN2	37.1511	31.089	22.2296	1.79539	1.81203	0.779386	0.314306	1.30774	1.4582	-4.36619	-4.87632	0.00272702	0.0025814	0.0409262	0.0285365	WAP%2C follistatin%2Fkazal%2C immunoglobulin%2C kunitz and netrin domain containing 2
XM_005693642.1	LOC102176263	21.4763	15.6463	17.881	-	-	-	35.0579	50.0197	39.9382	-	1.18451	-	0.00779968	-	0.0492151	nucleoside diphosphate kinase A 1-like%2C transcript variant X2
XM_005693639.1	NME2	169.406	158.893	150.164	-	-	-	318.873	349.501	363.083	-	1.1082	-	0.000203691	-	0.0109203	NME%2FNM23 nucleoside diphosphate kinase 2%2C transcript variant X1
XM_005693632.1	MAP2K3	0.0467681	0.0336516	0.0407203	-	-	-	0.449083	0.305757	0.493457	-	3.36521	-	0.0027019	-	0.0293029	mitogen-activated protein kinase kinase 3%2C transcript variant X2
XM_005693618.1	FLII	0.118554	0.0853045	0.123868	-	-	-	0.0227679	0.0258357	0.0500351	-	-1.73226	-	0.00675032	-	0.0458051	flightless I homolog %28Drosophila%29%2C transcript variant X3
XM_005693610.1	SLC5A10	0.477791	0.0343791	0.249604	-	-	-	8.39588	5.83085	9.14146	-	4.93904	-	0.0017297	-	0.0240799	solute carrier family 5 %28sodium%2Fsugar cotransporter%29%2C member 10
XM_005693608.1	MFAP4	253.46	227.39	259.457	-	-	-	499.143	611.931	551.991	-	1.16765	-	0.000830506	-	0.0178632	microfibrillar-associated protein 4
XM_005693605.1	ALDH3A2	19.4829	20.9924	22.2051	69.959	79.4329	96.9081	99.6706	108.055	98.0483	1.97433	2.28638	0.00151847	1.44e-05	0.033103	0.00406013	aldehyde dehydrogenase 3 family%2C member A2
XM_005693589.1	TEKT3	1.98221	2.11905	1.77519	-	-	-	0.706971	0.431971	0.87642	-	-1.54391	-	0.00141061	-	0.0221878	tektin 3
XM_005693580.1	LOC102182254	0.523596	0.188375	0.398902	8.48918	10.3997	14.0881	-	-	-	4.89169	-	0.00296917	-	0.0422784	-	putative transmembrane protein LOC100289255-like
XM_005693579.1	ADPRM	6.06876	7.72575	6.03883	-	-	-	1.85709	3.19732	2.15787	-	-1.4594	-	0.00365213	-	0.0336528	ADP-ribose%2FCDP-alcohol diphosphatase%2C manganese-dependent
XM_005693561.1	MYH10	214.345	251.397	304.94	57.5058	61.4866	46.7783	24.3691	41.9401	32.5393	-2.21695	-2.96284	0.00163827	0.00111858	0.0336288	0.0199608	myosin%2C heavy chain 10%2C non-muscle
XM_005693560.1	NDEL1	0.0716147	0.10306	0.187062	-	-	-	1.2378	1.48262	1.15861	-	3.42269	-	0.000345305	-	0.0124319	nudE neurodevelopment protein 1-like 1%2C transcript variant X2
XM_005693557.1	KRBA2	7.01146	7.44391	7.63097	2.82782	3.30142	1.93137	1.58415	3.22071	2.68355	-1.45419	-1.56042	0.000450593	0.00070182	0.0224857	0.0168294	KRAB-A domain containing 2
XM_005693548.1	AURKB	5.32434	3.95986	4.59687	-	-	-	1.89038	1.41381	2.45483	-	-1.26922	-	0.00547153	-	0.0410495	aurora kinase B%2C transcript variant X1
XM_005693546.1	PER1	53.0768	41.4797	45.8281	21.1212	18.0003	15.1256	-	-	-	-1.37177	-	0.00164379	-	0.0336376	-	period circadian clock 1
XM_005693502.1	FGF11	14.1964	12.9045	9.46768	-	-	-	2.9729	5.51277	3.87749	-	-1.56455	-	0.00718541	-	0.0472975	fibroblast growth factor 11
XM_005693499.1	TNK1	1.4319	1.19299	2.00133	-	-	-	10.0589	9.93616	8.98537	-	2.64717	-	4.04e-05	-	0.00636665	tyrosine kinase%2C non-receptor%2C 1
XM_005693496.1	KCTD11	8.97075	7.35491	9.70892	-	-	-	19.8706	18.4201	18.4024	-	1.12274	-	0.000272397	-	0.0117023	potassium channel tetramerization domain containing 11
XM_005693474.1	C19H17orf49	156.432	127.38	163.104	62.0819	77.4716	78.7175	66.0931	71.5898	65.4715	-1.03388	-1.13743	0.00334868	0.00187663	0.0438598	0.0249255	chromosome 19 open reading frame%2C human C17orf49
XM_005693468.1	CXCL16	3.87734	3.11813	3.44213	-	-	-	12.6295	15.2425	18.6102	-	2.15489	-	0.00233183	-	0.0274511	chemokine %28C-X-C motif%29 ligand 16
XM_005693461.1	PLD2	1.60547	1.19574	1.34881	-	-	-	0.540922	0.70588	0.67362	-	-1.1117	-	0.00459972	-	0.0374209	phospholipase D2%2C transcript variant X1
XM_005693432.1	FAM64A	8.08395	6.12756	7.68334	1.85169	2.65909	2.5273	2.1332	0.06724	1.99673	-1.63734	-2.3831	0.00156526	0.00274394	0.033494	0.0294532	family with sequence similarity 64%2C member A%2C transcript variant X2
XM_005693431.1	FAM64A	4.78032	4.88429	4.91134	0.832882	2.14568	1.00165	1.10165	0.312524	1.34501	-1.87267	-2.40128	0.00103874	0.000232872	0.0297408	0.0112217	family with sequence similarity 64%2C member A%2C transcript variant X1
XM_005693429.1	TXNDC17	20.7771	24.7	24.2253	-	-	-	45.9738	61.0273	55.4092	-	1.22036	-	0.00247963	-	0.0280067	thioredoxin domain containing 17
XM_005693413.1	CTNS	6.91386	5.50445	5.4018	-	-	-	13.9089	14.6946	16.0322	-	1.32469	-	0.000345623	-	0.0124319	cystinosin%2C lysosomal cystine transporter
XM_005693386.1	SGSM2	25.8022	21.6632	25.5261	-	-	-	10.6393	13.6271	8.90456	-	-1.13781	-	0.00229783	-	0.0273707	small G protein signaling modulator 2
XM_005693385.1	RTN4RL1	2.47272	2.30819	0.989199	-	-	-	11.5832	9.68502	8.41463	-	2.36296	-	0.00152092	-	0.0228294	reticulon 4 receptor-like 1
XM_005693375.1	DOC2B	10.3125	13.3462	10.2053	-	-	-	2.63606	4.78601	3.24076	-	-1.66716	-	0.00309822	-	0.0313628	double C2-like domains%2C beta
XM_005693358.1	TLCD1	4.26376	1.12098	3.56961	-	-	-	31.1002	26.5351	39.739	-	3.44288	-	0.00178612	-	0.0243826	TLC domain containing 1
XM_005693354.1	SARM1	14.3666	11.5693	10.6724	-	-	-	4.64607	6.11024	4.31101	-	-1.28075	-	0.00444772	-	0.0368593	sterile alpha and TIR motif containing 1
XM_005693347.1	RAB11FIP4	0.621129	0.297952	0.766145	8.41713	7.52757	10.895	8.2506	7.50114	8.15561	3.99336	3.82644	0.00118022	1.1e-05	0.030754	0.00369288	RAB11 family interacting protein 4 %28class II%29
XM_005693321.1	SMG6	30.5064	23.6164	26.8617	-	-	-	12.1083	13.3462	10.1171	-	-1.18692	-	0.00234239	-	0.0275168	SMG6 nonsense mediated mRNA decay factor
XM_005693276.1	PIPOX	0.139498	0.125468	0.0910939	-	-	-	0.468826	0.303999	0.417027	-	1.74059	-	0.00540857	-	0.0407875	pipecolic acid oxidase
XM_005693257.1	SPAG5	24.5757	21.3575	24.4858	8.18097	12.0585	9.79875	9.27511	9.04483	7.82063	-1.22917	-1.42967	0.000953546	0.000212706	0.0289514	0.0109617	sperm associated antigen 5
XM_005693255.1	FOXN1	1.49404	0.611289	1.24983	-	-	-	197.444	110.636	151.23	-	7.09694	-	0.00374242	-	0.0340859	forkhead box N1
XM_005693244.1	NOS2	4.15555	3.00644	2.39235	-	-	-	0.610538	0.692805	0.463216	-	-2.43521	-	0.00758811	-	0.0485151	nitric oxide synthase 2%2C inducible
XM_005693243.1	LOC102184087	0.238926	0.343834	0.208029	1.50325	1.44779	1.59293	-	-	-	2.52259	-	2.92e-05	-	0.011245	-	galectin-9-like%2C transcript variant X2
XM_005693221.1	MYO1D	5.4642	4.02027	5.27193	-	-	-	24.1783	22.3137	15.7552	-	2.07667	-	0.00364874	-	0.0336434	myosin ID
XM_005693220.1	TMEM98	59.3348	53.6168	64.0343	25.429	25.2639	20.466	16.7065	12.4622	11.4093	-1.31452	-2.12486	0.000500511	0.000184923	0.0233308	0.0104724	transmembrane protein 98
XM_005693203.1	RASL10B	20.3911	14.0383	18.5214	6.27463	6.21481	6.59364	-	-	-	-1.47236	-	0.00393605	-	0.0469524	-	RAS-like%2C family 10%2C member B
XM_005693196.1	MYO19	5.49938	4.09836	5.741	-	-	-	10.5883	15.2558	11.8418	-	1.29684	-	0.00741734	-	0.0480865	myosin XIX
XM_005693188.1	TEX14	0.612025	0.744087	0.606382	-	-	-	0.344506	0.0689871	0.17814	-	-1.72991	-	0.00763162	-	0.0486091	testis expressed 14
XM_005693181.1	CUEDC1	42.7456	45.0832	37.9934	20.3185	13.7619	15.146	-	-	-	-1.35388	-	0.000901916	-	0.0285374	-	CUE domain containing 1
XM_005693180.1	LOC102185031	3.42071	4.02657	3.45548	2.07345	1.89318	1.40759	-	-	-	-1.02057	-	0.00274061	-	0.0409262	-	uncharacterized LOC102185031
XM_005693174.1	PCTP	7.65667	8.42598	7.97371	3.92363	4.17802	3.57475	-	-	-	-1.04282	-	0.000129648	-	0.0162729	-	phosphatidylcholine transfer protein
XM_005693147.1	USP32	0.0769496	0.0830527	0.133998	0.20483	0.224506	0.201546	-	-	-	1.10156	-	0.00447199	-	0.0492329	-	ubiquitin specific peptidase 32%2C transcript variant X2
XM_005693104.1	2015-09-04	42.6191	46.1423	41.8904	85.9658	110.977	121.713	94.8122	111.41	123.08	1.28627	1.33368	0.00419951	0.0013415	0.0482383	0.0216826	septin 4
XM_005693054.1	LOC102189790	45.9532	54.618	28.9022	-	-	-	3.75257	5.58577	1.81104	-	-3.53762	-	0.00666214	-	0.0454797	paternally-expressed gene 3 protein-like
XM_005693048.1	LOC102188166	1.65454	2.52984	2.07084	-	-	-	0.29789	0.676058	0.654649	-	-1.94143	-	0.00536641	-	0.0406699	uncharacterized LOC102188166
XM_005693021.1	ZNF134	3.09227	2.66375	2.57863	-	-	-	0.878243	1.70843	1.04161	-	-1.19984	-	0.0063532	-	0.0443535	zinc finger protein 134%2C transcript variant X1
XM_005692968.1	BRSK1	8.5991	7.4613	7.98258	2.26449	1.58932	2.46907	0.85	1.03343	0.756086	-1.92696	-3.18727	0.000152312	3e-05	0.017147	0.00583372	BR serine%2Fthreonine kinase 1
XM_005692948.1	LOC102179314	35.9383	30.6281	27.3303	-	-	-	5.05976	7.44606	7.52878	-	-2.22858	-	0.000730386	-	0.0171919	soluble scavenger receptor cysteine-rich domain-containing protein SSC5D-like
XM_005692870.1	KLK10	43.9491	9.65124	52.3049	500.612	372.057	623.056	430.098	573.954	745.102	3.82	4.04581	0.00325995	0.00399057	0.0437723	0.0350399	kallikrein-related peptidase 10
XM_005692868.1	CLEC11A	7.84607	4.9069	9.64065	32.8627	31.0706	36.9454	-	-	-	2.17146	-	0.000296382	-	0.0204348	-	C-type lectin domain family 11%2C member A
XM_005692865.1	LRRC4B	13.3379	13.575	13.0648	3.56737	2.99342	3.92807	0.25278	0.286841	1.5431	-1.93034	-4.26266	5.86e-06	9.53e-06	0.00703491	0.00369288	leucine rich repeat containing 4B
XM_005692859.1	NAPSA	0.214682	0.205964	0.124614	-	-	-	1.09944	1.71543	1.71144	-	3.05332	-	0.00302402	-	0.0308764	napsin A aspartic peptidase
XM_005692857.1	MYH14	15.0578	8.8357	12.6268	58.5341	81.3386	91.2359	77.7372	78.1819	71.1071	2.6618	2.63609	0.0027538	2.64e-05	0.0409262	0.00533643	myosin%2C heavy chain 14%2C non-muscle
XM_005692853.1	IL4I1	2.47795	1.97575	2.624	-	-	-	5.53052	4.1595	4.85217	-	1.03889	-	0.00489071	-	0.0386403	interleukin 4 induced 1
XM_005692846.1	TSKS	0.286071	0.247008	0.697418	-	-	-	2.19756	2.9924	2.97813	-	2.73076	-	0.00151516	-	0.0228294	testis-specific serine kinase substrate
XM_005692840.1	CCDC155	1.70254	1.18793	1.48238	10.5371	15.8861	16.6087	10.0567	7.64535	7.1855	3.29876	2.50878	0.00256851	0.00162871	0.0404505	0.0234573	coiled-coil domain containing 155
XM_005692837.1	TRPM4	11.0186	9.27469	9.61387	-	-	-	5.30131	5.00884	4.28964	-	-1.03454	-	0.00113561	-	0.0201678	transient receptor potential cation channel%2C subfamily M%2C member 4
XM_005692828.1	HSD17B14	1.69533	0.677701	3.44423	-	-	-	38.256	21.2436	38.3591	-	4.07229	-	0.00592436	-	0.0425761	hydroxysteroid %2817-beta%29 dehydrogenase 14
XM_005692826.1	MAMSTR	30.4893	26.7408	23.9052	-	-	-	3.6414	14.4622	5.495	-	-1.78163	-	0.00756778	-	0.0484912	MEF2 activating motif and SAP domain containing transcriptional regulator
XM_005692825.1	DBP	6.08496	5.85931	8.25878	37.8516	26.9112	36.6483	25.606	31.1039	40.1585	2.32757	2.26145	0.00158354	0.00405824	0.033494	0.0353493	D site of albumin promoter %28albumin D-box%29 binding protein
XM_005692824.1	FAM83E	0.119463	0.128938	0.208029	0.462538	0.536219	0.398233	-	-	-	1.61386	-	0.00300833	-	0.0423753	-	family with sequence similarity 83%2C member E
XM_005692819.1	EMP3	264.902	197.377	279.907	79.5348	82.3321	66.2706	61.367	84.1058	76.2853	-1.70188	-1.74279	0.00269119	0.00271493	0.0409149	0.0293547	epithelial membrane protein 3
XM_005692817.1	LOC102176069	2.30309	3.00907	2.42743	-	-	-	0.931159	1.25475	0.937903	-	-1.30895	-	0.00315425	-	0.0317486	zinc finger protein 114-like
XM_005692797.1	FKRP	8.57794	9.28258	8.46843	-	-	-	3.95627	4.63655	3.32572	-	-1.14344	-	0.000461054	-	0.0138389	fukutin related protein
XM_005692795.1	LOC102169697	316.975	233.656	339.122	-	-	-	78.1867	137.023	107.967	-	-1.46108	-	0.00651866	-	0.0449554	uncharacterized LOC102169697
XM_005692794.1	HIF3A	59.4069	51.0712	57.7374	7.87956	4.475	6.40297	3.68879	4.08617	3.60291	-3.16477	-3.88601	5.31e-05	3.35e-05	0.0136381	0.00585538	hypoxia inducible factor 3%2C alpha subunit
XM_005692793.1	PGLYRP1	4.23497	1.09701	2.50738	12.2978	16.5759	19.0383	-	-	-	2.61158	-	0.00352357	-	0.0448095	-	peptidoglycan recognition protein 1
XM_005692786.1	SIX5	26.371	19.9369	22.5376	-	-	-	7.52667	10.1961	9.61672	-	-1.33238	-	0.00245373	-	0.0279761	SIX homeobox 5
XM_005692780.1	PPP1R13L	35.1188	11.3746	29.1328	-	-	-	78.5082	82.0563	92.7817	-	1.74415	-	0.00205752	-	0.0260328	protein phosphatase 1%2C regulatory subunit 13 like
XM_005692778.1	KLC3	14.9694	5.87514	15.4033	-	-	-	114.63	98.1126	126.834	-	3.22777	-	0.000339777	-	0.0124319	kinesin light chain 3
XM_005692775.1	NKPD1	0.329403	0.11851	0.478011	8.76828	9.95558	14.0135	10.5962	12.2632	15.5242	5.1439	5.37346	0.0026354	0.00100223	0.0406636	0.0192983	NTPase%2C KAP family P-loop domain containing 1
XM_005692765.1	PHLDB3	14.9593	8.81817	13.4425	35.9675	43.772	51.051	42.5068	36.9243	45.5872	1.81311	1.74799	0.0027409	0.000734552	0.0409262	0.0171919	pleckstrin homology-like domain%2C family B%2C member 3
XM_005692753.1	KLK11	0.147681	0.0531314	0.257167	15.7958	18.8257	20.3249	16.8752	30.3327	31.6835	6.9066	7.42844	0.0001682	0.00522329	0.0174374	0.0400349	kallikrein-related peptidase 11
XM_005692750.1	KLK7	0.748825	1.02864	0.770535	95.5455	128.458	127.405	-	-	-	7.10764	-	0.000421835	-	0.022363	-	kallikrein-related peptidase 7
XM_005692739.1	SPIB	0.87186	1.38538	1.64475	-	-	-	0.139531	0.158333	0.0511062	-	-3.48303	-	0.00669488	-	0.0456035	Spi-B transcription factor %28Spi-1%2FPU.1 related%29%2C transcript variant X1
XM_005692732.1	CPT1C	14.5108	13.15	15.1166	3.29031	4.725	4.10788	2.63231	3.94285	3.05953	-1.81908	-2.15054	0.000139024	9.31e-05	0.0166985	0.00867593	carnitine palmitoyltransferase 1C
XM_005692725.1	PRRG2	2.73165	2.68969	3.69279	-	-	-	9.80182	10.8876	11.9839	-	1.84194	-	0.000379969	-	0.0128588	proline rich Gla %28G-carboxyglutamic acid%29 2
XM_005692687.1	FUT1	0.778638	0.476223	1.79656	-	-	-	9.94406	8.01756	8.05121	-	3.09167	-	0.00052362	-	0.0145791	fucosyltransferase 1 %28galactoside 2-alpha-L-fucosyltransferase%2C H blood group%29
XM_005692684.1	CA11	66.5355	56.321	77.2784	10.2681	12.115	6.15773	10.3067	8.95971	11.4797	-2.80987	-2.7025	0.000816674	0.000754672	0.0276021	0.0173342	carbonic anhydrase XI
XM_005692681.1	SULT2B1	2.98348	2.02046	2.13926	-	-	-	61.6783	78.7857	94.8695	-	5.04199	-	0.00136667	-	0.0217873	sulfotransferase family%2C cytosolic%2C 2B%2C member 1
XM_005692663.1	C5AR1	1.79512	1.6048	1.65771	-	-	-	3.60418	3.85273	3.52027	-	1.11797	-	6.72e-05	-	0.00781083	complement component 5a receptor 1
XM_005692620.1	LYPD5	1.13209	0.905097	1.04046	54.2426	62.7845	92.5493	-	-	-	6.08951	-	0.00405651	-	0.0475881	-	LY6%2FPLAUR domain containing 5
XM_005692599.1	LYPD3	60.814	18.5501	52.9498	-	-	-	166.358	177.106	210.897	-	2.06686	-	0.00166038	-	0.0237446	LY6%2FPLAUR domain containing 3
XM_005692587.1	GRIK5	20.5065	15.1463	16.7191	4.34861	4.81366	4.10637	2.01781	3.11873	2.90528	-1.98077	-2.7032	0.00124805	0.000813093	0.0309825	0.0177279	glutamate receptor%2C ionotropic%2C kainate 5
XM_005692580.1	MEGF8	36.6849	33.5479	34.1892	-	-	-	16.2776	21.3635	14.3457	-	-1.00621	-	0.00161225	-	0.0234533	multiple EGF-like-domains 8
XM_005692569.1	DEDD2	7.89115	4.35431	6.82856	-	-	-	43.0468	34.5517	50.3991	-	2.74644	-	0.0015083	-	0.0228129	death effector domain containing 2
XM_005692556.1	SHKBP1	40.3218	31.7333	35.0015	-	-	-	81.1837	83.752	91.55	-	1.2605	-	0.000238535	-	0.0112217	SH3KBP1 binding protein 1
XM_005692553.1	PRX	5.27549	2.82035	3.84205	-	-	-	10.4865	16.5196	15.3288	-	1.8263	-	0.00686831	-	0.0463733	periaxin
XM_005692552.1	HIPK4	25.6024	23.9642	27.5182	2.41519	2.11009	2.44536	0.86809	2.52176	2.41646	-3.46709	-3.73076	2.26e-05	3.33e-05	0.0108542	0.00585538	homeodomain interacting protein kinase 4
XM_005692530.1	LGALS7B	16.4706	4.60884	13.4302	-	-	-	547.898	636.111	582.865	-	5.67806	-	2.39e-05	-	0.00521345	lectin%2C galactoside-binding%2C soluble%2C 7B
XM_005692529.1	LGALS7	26.6518	17.6429	40.4436	-	-	-	1509.19	1289.89	1621.68	-	5.70514	-	0.000121278	-	0.0090939	lectin%2C galactoside-binding%2C soluble%2C 7
XM_005692528.1	ACTN4	196.621	160.835	190.759	-	-	-	401.836	432.778	338.606	-	1.09766	-	0.00221541	-	0.0269732	actinin%2C alpha 4
XM_005692524.1	KCNK6	6.47439	7.98038	6.76459	-	-	-	16.4343	15.0294	11.8012	-	1.02782	-	0.00708937	-	0.0470037	potassium channel%2C subfamily K%2C member 6
XM_005692522.1	DPF1	10.1678	9.56284	9.27119	0.774956	1.50932	0.610026	0.30751	0.697891	0.394211	-3.32486	-4.37304	2.21e-05	5.83e-06	0.0108542	0.00369288	D4%2C zinc and double PHD fingers family 1
XM_005692509.1	NPHS1	1.83307	1.4461	1.36528	0.448927	0.594788	0.567939	0.636209	0.312839	0.481584	-1.52697	-1.69886	0.00259932	0.00337913	0.0406636	0.0327782	nephrosis 1%2C congenital%2C Finnish type %28nephrin%29
XM_005692508.1	ARHGAP33	4.1125	4.03344	4.24209	1.77484	2.06932	1.5967	1.38339	0.856253	0.939689	-1.18704	-1.96215	0.000104446	6.14e-05	0.0156871	0.00759404	Rho GTPase activating protein 33
XM_005692507.1	C18H19orf55	6.64612	5.52168	8.6502	-	-	-	1.77639	2.38903	1.97601	-	-1.76119	-	0.00631452	-	0.044236	chromosome 18 open reading frame%2C human C19orf55
XM_005692471.1	SNTB2	33.8594	41.5165	31.7325	17.5996	16.8303	13.3152	-	-	-	-1.16565	-	0.00368147	-	0.0455365	-	syntrophin%2C beta 2 %28dystrophin-associated protein A1%2C 59kDa%2C basic component 2%29
XM_005692467.1	ESRP2	19.2442	7.47671	14.8488	-	-	-	38.9713	36.3274	33.5955	-	1.38932	-	0.00398714	-	0.0350399	epithelial splicing regulatory protein 2
XM_005692465.1	DPEP2	0.887564	0.456171	0.441594	3.98877	2.67491	3.32101	3.04382	2.14145	3.38917	2.48353	2.26385	0.00254918	0.00479686	0.0403224	0.0383203	dipeptidase 2
XM_005692443.1	CMTM3	189.018	163.354	167.881	55.9275	64.0651	55.6857	39.0099	36.0979	35.0699	-1.56628	-2.23938	0.000163723	6.87e-05	0.0174374	0.00791479	CKLF-like MARVEL transmembrane domain containing 3
XM_005692425.1	EGLN2	84.1645	78.4169	88.2201	-	-	-	35.047	42.287	41.8057	-	-1.07389	-	0.000283548	-	0.0117843	egl-9 family hypoxia-inducible factor 2
XM_005692416.1	SERTAD1	21.7262	18.6133	20.89	-	-	-	66.1138	63.5263	93.7286	-	1.86713	-	0.00510272	-	0.0395168	SERTA domain containing 1
XM_005692399.1	PLEKHG2	2.26268	1.76568	2.10882	0.709492	0.915492	0.637413	0.612029	0.71186	0.459545	-1.43973	-1.78292	0.00157051	0.000904669	0.033494	0.0184899	pleckstrin homology domain containing%2C family G %28with RhoGef domain%29 member 2%2C transcript variant X1
XM_005692398.1	ZFP36	30.5023	27.1023	26.2168	97.6213	138.871	112.688	118.984	118.795	135.19	2.05858	2.15367	0.00187521	6.63e-05	0.0363196	0.00781083	ZFP36 ring finger protein
XM_005692394.1	NCCRP1	0.280057	0.201513	0.487683	21.5059	36.1195	39.7438	32.3601	25.9383	43.9955	6.65045	6.72163	0.0044959	0.00307811	0.0493419	0.0312039	non-specific cytotoxic cell receptor protein 1 homolog %28zebrafish%29
XM_005692381.1	RINL	0.312168	0.128353	0.194143	0.647493	0.720612	0.679588	-	-	-	1.68994	-	0.00123294	-	0.0309825	-	Ras and Rab interactor-like
XM_005692378.1	ECH1	59.0703	51.8631	54.4296	-	-	-	138.864	149.155	158.129	-	1.43189	-	9.55e-05	-	0.00871972	enoyl CoA hydratase 1%2C peroxisomal
XM_005692332.1	GRAMD1A	29.5545	21.8601	27.705	-	-	-	13.4347	10.7441	12.3346	-	-1.11561	-	0.00438284	-	0.0366797	GRAM domain containing 1A
XM_005692318.1	LSR	6.50507	3.76565	6.89885	-	-	-	35.0831	29.6846	36.3994	-	2.55881	-	0.00025187	-	0.0114407	lipolysis stimulated lipoprotein receptor
XM_005692311.1	KRTDAP	286.678	186.624	373.034	-	-	-	1226.83	1182.09	1370.44	-	2.15884	-	0.00023648	-	0.0112217	keratinocyte differentiation-associated protein%2C transcript variant X1
XM_005692309.1	DMKN	0.246838	0.355221	0.257902	5.20863	5.58409	6.44168	10.8082	8.17638	12.0151	4.32487	5.17184	0.000118431	0.000895894	0.0162008	0.0184544	dermokine%2C transcript variant X1
XM_005692308.1	SBSN	0.537245	0.128857	0.935543	12.4807	12.1645	17.2838	16.6228	19.383	29.4345	4.71032	5.35255	0.00130079	0.00548308	0.0309825	0.0410699	suprabasin%2C transcript variant X1
XM_005692299.1	RBM42	3.93161	3.15227	3.08088	-	-	-	7.3348	8.01714	7.58547	-	1.17413	-	0.000227459	-	0.0112217	RNA binding motif protein 42%2C transcript variant X1
XM_005692259.1	LOC102169125	1.6385	1.30996	1.90215	346.979	362.823	577.408	-	-	-	8.05187	-	0.0045289	-	0.0493777	-	major allergen I polypeptide chain 2-like
XM_005692256.1	LOC102191166	0.421431	0.454856	0.366934	-	-	-	3953.04	2965.28	4856.85	-	13.2094	-	0.00198766	-	0.0256784	major allergen I polypeptide chain 1-like
XM_005692237.1	ZNF536	7.73107	8.11603	11.357	1.55423	1.29908	0.755216	0.437804	1.01519	0.752969	-2.91434	-3.62434	0.00258069	0.00200168	0.0405537	0.0257187	zinc finger protein 536
XM_005692236.1	CCNE1	4.0048	4.47819	3.53404	0.57623	1.70042	0.463903	1.14327	1.12041	1.52271	-2.13254	-1.66619	0.00298146	0.000815757	0.0422862	0.0177587	cyclin E1
XM_005692180.1	CDH1	27.8734	11.0049	25.6727	80.4478	117.114	127.869	115.697	117.926	85.8863	2.33384	2.30735	0.00473042	0.00185088	0.0499746	0.0247693	cadherin 1%2C type 1%2C E-cadherin %28epithelial%29
XM_005692174.1	PLA2G15	9.60035	9.50025	8.50916	2.81913	2.45963	2.09587	1.96801	2.30371	1.7148	-1.90454	-2.20539	7.69e-05	4.93e-05	0.0145856	0.00679205	phospholipase A2%2C group XV
XM_005692157.1	CENPT	17.008	15.5426	21.9712	-	-	-	5.04003	6.65401	5.85754	-	-1.63523	-	0.00352269	-	0.0331497	centromere protein T
XM_005692129.1	EXOC3L1	3.02606	2.66988	2.44655	-	-	-	1.21072	1.09909	1.11496	-	-1.24947	-	0.000799825	-	0.0175466	exocyst complex component 3-like 1
XM_005692102.1	CDH5	2.79198	3.23453	3.24125	-	-	-	0.994819	1.70287	0.926371	-	-1.35462	-	0.00288624	-	0.0303216	cadherin 5%2C type 2 %28vascular endothelium%29%2C transcript variant X2
XM_005692099.1	CDH11	163.861	230.96	187.106	42.7447	44.3867	22.7758	27.3631	43.3293	29.0523	-2.40455	-2.54452	0.00165571	0.00138048	0.0337772	0.0218839	cadherin 11%2C type 2%2C OB-cadherin %28osteoblast%29
XM_005692095.1	MMP15	45.7426	49.7571	40.1972	-	-	-	9.83543	9.41855	8.92698	-	-2.2676	-	0.00020993	-	0.0109203	matrix metallopeptidase 15 %28membrane-inserted%29
XM_005692091.1	CCDC102A	36.028	29.6327	30.6529	-	-	-	14.0066	14.9379	17.8978	-	-1.03992	-	0.00201879	-	0.0258283	coiled-coil domain containing 102A
XM_005692082.1	IRX5	24.4426	19.4166	24.9139	7.69715	6.1439	8.25664	8.57458	7.95443	11.0953	-1.63795	-1.3159	0.00113832	0.00238565	0.0304079	0.0277355	iroquois homeobox 5
XM_005692081.1	IRX3	54.7101	36.6419	64.7774	-	-	-	12.7246	9.90116	11.4519	-	-2.19585	-	0.00793631	-	0.0497	iroquois homeobox 3
XM_005692080.1	TOX3	3.84294	3.80209	4.01984	0.103327	0.0958297	0.305013	0.102503	0.319867	0.187719	-4.53212	-4.25701	2.62e-06	2.32e-06	0.00471244	0.00243567	TOX high mobility group box family member 3
XM_005692078.1	NOD2	0.618911	0.790106	0.608409	3.01471	3.20818	3.70798	-	-	-	2.2994	-	0.000252424	-	0.0197715	-	nucleotide-binding oligomerization domain containing 2
XM_005692076.1	ADCY7	3.11841	4.7143	3.41451	18.248	22.4521	21.3306	16.2575	20.0956	12.7291	2.46342	2.12563	0.000232099	0.00445734	0.019519	0.0368981	adenylate cyclase 7
XM_005692073.1	ZNF423	38.3993	37.8767	28.4664	-	-	-	8.36474	11.3089	8.79768	-	-1.87926	-	0.00162677	-	0.0234533	zinc finger protein 423
XM_005692061.1	SPIRE2	1.69935	1.47357	0.94846	6.36867	8.64468	9.91863	10.8785	8.45109	13.3326	2.5968	2.98642	0.00283661	0.00262759	0.0414559	0.0287672	spire-type actin nucleation factor 2
XM_005692028.1	GPR56	25.2495	12.5236	23.7156	82.7595	121.183	125.509	135.769	120.378	125.11	2.42167	2.63237	0.00323442	6.16e-05	0.0435996	0.00759404	G protein-coupled receptor 56
XM_005692027.1	GPR114	0.694684	0.639814	0.943568	-	-	-	0.106729	0.242221	0.117275	-	-2.28871	-	0.00423709	-	0.03618	G protein-coupled receptor 114
XM_005692024.1	DOK4	1.63391	1.44908	1.8858	-	-	-	5.40005	5.0926	5.79999	-	1.71326	-	9.66e-05	-	0.00871972	docking protein 4%2C transcript variant X1
XM_005691999.1	MT2A	2.50686	1.96777	2.97639	225.887	332.452	413.059	181.413	249.81	151.488	7.02648	6.2892	0.0040587	0.00274695	0.0475881	0.0294532	metallothionein 2A
XM_005691992.1	GNAO1	0.117469	0.21131	0.255697	-	-	-	0.53579	0.44799	0.516432	-	1.35995	-	0.00330077	-	0.0322388	guanine nucleotide binding protein %28G protein%29%2C alpha activating activity polypeptide O%2C transcript variant X1
XM_005691986.1	CAPNS2	13.981	6.18547	12.2553	-	-	-	31.6576	41.9963	38.2077	-	1.78668	-	0.00230755	-	0.0273891	calpain%2C small subunit 2
XM_005691985.1	MMP2	912.167	820.864	959.667	341.987	322.34	240.542	-	-	-	-1.57327	-	0.000311941	-	0.0207916	-	matrix metallopeptidase 2 %28gelatinase A%2C 72kDa gelatinase%2C 72kDa type IV collagenase%29
XM_005691984.1	FTO	5.95004	6.23206	7.03979	3.08869	2.49842	2.67356	1.6357	2.27438	1.29947	-1.21842	-1.88352	0.000593164	0.000422749	0.0246388	0.0133434	fat mass and obesity associated%2C transcript variant X2
XM_005691949.1	GPT2	19.0065	14.0854	16.0084	-	-	-	40.5985	31.1071	33.3234	-	1.09699	-	0.00434568	-	0.036562	glutamic pyruvate transaminase %28alanine aminotransferase%29 2
XM_005691940.1	LOC102171182	0.266571	0.255746	0.11605	0.98911	0.678032	1.01557	-	-	-	2.07123	-	0.00456402	-	0.0494479	-	tigger transposable element-derived protein 1-like
XM_005691917.1	ZFPM1	6.60588	4.69304	5.86085	-	-	-	2.24822	2.59671	2.99973	-	-1.12925	-	0.00653141	-	0.0449554	zinc finger protein%2C FOG family member 1
XM_005691915.1	SLC7A5	9.52194	6.7171	8.29062	-	-	-	177.906	123.961	128.09	-	4.13159	-	0.00146629	-	0.0226532	solute carrier family 7 %28amino acid transporter light chain%2C L system%29%2C member 5
XM_005691909.1	FOXL1	0.414086	0.297952	0.0901347	2.00408	2.04452	1.57756	-	-	-	2.81017	-	0.000812041	-	0.0275979	-	forkhead box L1
XM_005691901.1	WFDC1	10.8055	9.36986	13.5092	83.6735	116.776	95.1966	90.655	139.55	153.183	3.13371	3.50865	0.000869186	0.00359265	0.0283459	0.0334148	WAP four-disulfide core domain 1
XM_005691895.1	PLCG2	1.60201	1.19622	1.63171	4.65203	4.9657	6.16085	-	-	-	1.83261	-	0.00140877	-	0.0317142	-	phospholipase C%2C gamma 2 %28phosphatidylinositol-specific%29
XM_005691893.1	GAN	2.46773	3.40632	2.54326	12.6257	11.7095	12.5672	14.7979	15.9138	17.004	2.13229	2.50303	2.32e-05	4.92e-05	0.0108542	0.00679205	gigaxonin
XM_005691887.1	ADAMTS18	2.25387	2.2874	1.91848	8.15674	9.55801	8.44251	-	-	-	2.01766	-	0.000121111	-	0.0162008	-	ADAM metallopeptidase with thrombospondin type 1 motif%2C 18
XM_005691885.1	LOC100861246	49.1144	46.6088	50.3697	-	-	-	92.5835	101.112	110.612	-	1.05864	-	0.000582565	-	0.0153459	GABA%28A%29 receptor-associated protein-like protein 2
XM_005691880.1	FA2H	0.0784422	0.395097	0.546388	32.9529	48.765	58.611	88.9939	55.7279	69.1643	7.1042	7.71223	0.00341616	0.00183138	0.0440312	0.0246715	fatty acid 2-hydroxylase
XM_005691879.1	GLG1	76.9334	73.0691	74.9444	37.8692	37.2919	29.8054	28.2804	40.9983	20.6032	-1.09966	-1.32348	0.000144852	0.00174257	0.0166985	0.0241877	golgi glycoprotein 1
XM_005691874.1	FUK	7.15335	6.63771	6.62287	-	-	-	2.33107	4.12647	2.55002	-	-1.18035	-	0.00301762	-	0.0308702	fucokinase
XM_005691873.1	IL34	2.05529	1.47887	2.38602	-	-	-	9.67983	8.63802	12.8737	-	2.39744	-	0.00293632	-	0.0305256	interleukin 34
XM_005691855.1	FBXO31	8.92751	6.88921	10.3077	22.2297	17.3645	22.3047	-	-	-	1.24451	-	0.0033698	-	0.0438652	-	F-box protein 31
XM_005691841.1	COTL1	115.074	95.6137	103.417	45.2256	44.8457	33.9772	36.1741	30.4821	32.7	-1.34034	-1.66056	0.000718272	0.000263366	0.0260058	0.0115986	coactosin-like 1 %28Dictyostelium%29
XM_005691840.1	ATP2C2	2.51009	1.67017	3.0785	-	-	-	12.4401	12.9694	15.3211	-	2.48832	-	0.000333177	-	0.0124319	ATPase%2C Ca%2B%2B transporting%2C type 2C%2C member 2
XM_005691838.1	HSDL1	7.91438	9.44069	6.73373	-	-	-	3.06298	4.0987	2.75177	-	-1.2809	-	0.00588135	-	0.0424176	hydroxysteroid dehydrogenase like 1
XM_005691832.1	HSD17B2	2.9311	1.17169	1.3611	-	-	-	5.44144	5.96173	6.82672	-	1.7383	-	0.00348298	-	0.0330836	hydroxysteroid %2817-beta%29 dehydrogenase 2
XM_005691824.1	C18H16orf46	1.50468	2.42179	2.24097	-	-	-	0.684402	0.560894	0.696322	-	-1.66742	-	0.00768638	-	0.0487607	chromosome 18 open reading frame%2C human C16orf46%2C transcript variant X1
XM_005691818.1	VAT1L	1.77383	2.04215	2.00778	16.3113	19.1087	19.3443	-	-	-	3.23321	-	7.56e-05	-	0.0145856	-	vesicle amine transport 1-like
XM_005691791.1	RFWD3	0.585376	0.580969	0.667854	-	-	-	0.271357	0.263933	0.0851915	-	-1.56369	-	0.00381263	-	0.0343364	ring finger and WD repeat domain 3%2C transcript variant X1
XM_005691790.1	LOC102171180	3.6551	3.945	3.75529	0.566075	1.18125	0.835501	0.631756	1.11515	0.617048	-2.13636	-2.2641	0.000120645	8.38e-05	0.0162008	0.00832892	C-type lectin domain family 18 member A-like
XM_005691759.1	LOC102184363	3.78949	2.41529	4.44829	-	-	-	7.64247	7.25756	6.54881	-	1.00963	-	0.00609219	-	0.0432991	uncharacterized LOC102184363
XM_005691754.1	SUSD2	1.98144	0.904788	1.69203	10.8068	11.8014	12.8837	8.74483	5.64665	9.5419	2.95462	2.38615	0.000110903	0.00633299	0.0162008	0.0443215	sushi domain containing 2
XM_005691748.1	ZNF70	16.6122	14.3729	18.5631	-	-	-	5.94149	8.28104	6.43396	-	-1.26224	-	0.0023682	-	0.0276686	zinc finger protein 70
XM_005691745.1	YPEL1	37.0755	38.9429	37.1048	18.7687	12.4334	20.0914	18.4144	11.3765	8.84298	-1.14105	-1.54996	0.0010806	0.0010615	0.0298305	0.0197164	yippee-like 1 %28Drosophila%29
XM_005691731.1	PATZ1	35.9264	29.9948	37.4052	-	-	-	19.9915	14.4033	14.3789	-	-1.08304	-	0.00344892	-	0.0330366	POZ %28BTB%29 and AT hook containing zinc finger 1
XM_005691724.1	SEC14L4	0.351193	0.101079	0.122311	-	-	-	17.7381	19.516	10.3754	-	6.3732	-	0.00498118	-	0.0390234	SEC14-like 4 %28S. cerevisiae%29
XM_005691723.1	MTFP1	7.94222	6.20741	5.7229	-	-	-	2.23532	2.2381	2.69699	-	-1.47065	-	0.0035933	-	0.0334148	mitochondrial fission process 1
XM_005691707.1	TTC28	17.5996	17.6985	16.3809	7.36673	6.02311	5.05497	3.48571	6.28772	2.40374	-1.48636	-2.0854	0.000152263	0.00043473	0.017147	0.0135109	tetratricopeptide repeat domain 28
XM_005691689.1	USP30	21.6304	22.723	20.5965	-	-	-	10.5965	11.7045	9.35196	-	-1.03699	-	0.000265902	-	0.0116668	ubiquitin specific peptidase 30
XM_005691684.1	LOC102181416	2.57841	1.94362	1.17594	-	-	-	6.60233	10.9704	8.55019	-	2.19679	-	0.00683326	-	0.0462248	uncharacterized LOC102181416
XM_005691683.1	TRPV4	6.15779	3.4852	7.02879	-	-	-	12.4027	14.1557	12.8887	-	1.24251	-	0.00307108	-	0.0311995	transient receptor potential cation channel%2C subfamily V%2C member 4
XM_005691682.1	GIT2	29.9792	33.6543	26.1805	-	-	-	10.0953	15.9127	10.8782	-	-1.28386	-	0.00334842	-	0.0325249	G protein-coupled receptor kinase interacting ArfGAP 2
XM_005691679.1	ACADS	15.9544	17.9231	13.7815	-	-	-	30.3977	29.9586	37.2604	-	1.03438	-	0.00327282	-	0.0321845	acyl-CoA dehydrogenase%2C C-2 to C-3 short chain
XM_005691651.1	LIMK2	39.2706	20.7164	35.561	-	-	-	175.225	135.522	159.726	-	2.29981	-	0.000629329	-	0.0158981	LIM domain kinase 2
XM_005691581.1	GLTP	51.7539	44.3129	57.6549	-	-	-	142.794	166.098	163.819	-	1.62064	-	0.000220296	-	0.0111501	glycolipid transfer protein
XM_005691571.1	MLEC	89.5169	83.9008	85.4132	-	-	-	37.1938	52.2617	34.3013	-	-1.0645	-	0.00149872	-	0.0227408	malectin
XM_005691559.1	ALDH2	87.7381	64.9902	94.917	-	-	-	349.06	246.068	281.356	-	1.82345	-	0.00265971	-	0.0290173	aldehyde dehydrogenase 2 family %28mitochondrial%29
XM_005691549.1	TRAFD1	4.78506	3.49369	4.19692	-	-	-	2.09468	1.87854	1.08895	-	-1.30129	-	0.00687626	-	0.0463828	TRAF-type zinc finger domain containing 1%2C transcript variant X1
XM_005691519.1	HIP1R	12.6437	8.85829	12.0338	-	-	-	38.2906	30.4262	38.1494	-	1.67203	-	0.00101638	-	0.0193349	huntingtin interacting protein 1 related
XM_005691512.1	TMEM132B	1.01416	1.84579	1.19467	-	-	-	0.0572841	0.0650029	0.0629444	-	-4.45216	-	0.00695019	-	0.0465932	transmembrane protein 132B
XM_005691511.1	TMEM132C	114.896	86.4671	158.961	-	-	-	6.34919	6.67968	6.21394	-	-4.2269	-	0.00572619	-	0.0418657	transmembrane protein 132C
XM_005691508.1	FZD10	41.6725	18.5392	53.4176	-	-	-	122.986	97.894	119.431	-	1.58252	-	0.0042404	-	0.03618	frizzled family receptor 10
XM_005691507.1	RIMBP2	2.50649	2.02347	1.70331	0.68051	0.329286	0.582262	0.880543	0.432983	0.322516	-1.9691	-1.92978	0.00377146	0.00608752	0.0459491	0.0432991	RIMS binding protein 2
XM_005691504.1	MMP17	2.60364	1.87343	2.12526	0.89257	0.292166	0.671612	0.0520854	0.0591036	0.267082	-1.83051	-4.12548	0.0046341	0.000774808	0.0496856	0.0175036	matrix metallopeptidase 17 %28membrane-inserted%29
XM_005691485.1	TPCN1	0.539788	0.388401	0.391655	-	-	-	0.143979	0.0653516	0.042188	-	-2.39163	-	0.00372076	-	0.0339759	two pore segment channel 1%2C transcript variant X3
XM_005691469.1	TBX5	5.6573	4.35633	3.11099	-	-	-	0.095304	0.162219	0.628326	-	-3.88907	-	0.00565189	-	0.0416675	T-box 5
XM_005691467.1	RNFT2	6.64245	7.20722	7.12991	2.6875	2.93419	1.10463	0.742448	1.18714	0.66748	-1.6411	-3.01403	0.00137492	1.4e-05	0.0315233	0.00403631	ring finger protein%2C transmembrane 2
XM_005691466.1	NOS1	0.0827811	0.297823	0.324343	1.40224	1.35623	1.0841	-	-	-	2.44649	-	0.00112674	-	0.0302915	-	nitric oxide synthase 1 %28neuronal%29
XM_005691456.1	HSPB8	14.6009	27.3447	9.74497	138.867	159.618	179.184	144.55	157.763	173.165	3.20804	3.20141	0.000372034	0.000134267	0.0216375	0.00937708	heat shock 22kDa protein 8
XM_005691451.1	CIT	9.14286	12.171	11.4644	2.33285	2.9377	3.35895	2.7495	3.97526	3.17282	-1.92539	-1.72759	0.00111509	0.00148558	0.0301471	0.0226736	citron %28rho-interacting%2C serine%2Fthreonine kinase 21%29
XM_005691440.1	HVCN1	2.46353	3.49152	3.44494	0.794862	0.804202	1.27983	-	-	-	-1.70714	-	0.00425422	-	0.0483633	-	hydrogen voltage-gated channel 1%2C transcript variant X1
XM_005691388.1	KNTC1	6.18189	7.62537	7.25674	1.46923	2.18019	1.36682	1.37801	2.19519	1.3977	-2.0701	-2.0832	0.000442322	0.000461445	0.022464	0.0138389	kinetochore associated 1
XM_005691343.1	SCARB1	3.52724	2.10041	4.30662	-	-	-	11.1342	9.76299	11.8066	-	1.71897	-	0.00100452	-	0.0193161	scavenger receptor class B%2C member 1%2C transcript variant X1
XM_005691331.1	POLE	9.86056	8.23673	11.1027	-	-	-	4.08531	4.59737	4.03429	-	-1.19922	-	0.00293797	-	0.0305256	polymerase %28DNA directed%29%2C epsilon%2C catalytic subunit
XM_005691309.1	PDGFC	2.69324	3.43285	3.11545	0.558627	0.518092	0.659606	0.665006	1.04807	0.730715	-2.41209	-1.91901	0.000330961	0.000756275	0.0211388	0.0173429	platelet derived growth factor C%2C transcript variant X1
XM_005691275.1	FAT4	17.4325	25.0826	17.8114	-	-	-	2.54174	7.46431	2.74935	-	-2.24168	-	0.00587995	-	0.0424176	FAT atypical cadherin 4
XM_005691246.1	PCDH18	4.56781	7.2415	5.04416	-	-	-	0.303109	1.35557	0.927341	-	-2.70424	-	0.00563585	-	0.0416675	protocadherin 18%2C transcript variant X2
XM_005691225.1	RNF150	12.6056	16.7842	14.9588	7.1081	3.9836	2.67424	1.65916	3.82962	1.43638	-1.68779	-2.67897	0.00466582	0.000951753	0.0497727	0.018903	ring finger protein 150
XM_005691218.1	USP38	3.83698	6.57164	4.32892	15.7453	17.077	14.9782	16.2425	21.0809	21.4777	1.69753	1.99635	0.000450962	0.00145319	0.0224857	0.0225818	ubiquitin specific peptidase 38
XM_005691215.1	ZNF827	8.38524	9.00418	7.56883	-	-	-	3.44725	4.24704	3.24675	-	-1.18977	-	0.000823516	-	0.0178048	zinc finger protein 827
XM_005691213.1	HHIP	2.0958	2.29911	1.6453	-	-	-	4.98167	5.95242	6.62186	-	1.53929	-	0.00171629	-	0.0240201	hedgehog interacting protein
XM_005691206.1	LOC102176152	5.9795	7.44144	5.69742	-	-	-	2.99725	3.56502	2.11625	-	-1.13944	-	0.00709433	-	0.0470037	zinc finger protein 513-like
XM_005691193.1	FAM160A1	7.7239	6.30613	6.95632	-	-	-	12.7296	16.2294	14.8514	-	1.06182	-	0.00227165	-	0.027283	family with sequence similarity 160%2C member A1
XM_005691189.1	KIAA0922	19.1537	20.1874	16.8447	-	-	-	7.70683	9.54726	9.52843	-	-1.06892	-	0.0010799	-	0.0197486	KIAA0922 ortholog
XM_005691187.1	LOC102169503	262.631	272.238	241.425	47.5772	35.6393	37.327	4.3986	5.98163	8.64356	-2.68705	-5.35073	2.43e-05	1.04e-05	0.0108542	0.00369288	uncharacterized LOC102169503
XM_005691165.1	MND1	4.36502	5.83295	4.99502	2.29364	2.12721	1.18783	1.91609	2.03838	1.92996	-1.43767	-1.36843	0.00428598	0.00190364	0.0485161	0.0250962	meiotic nuclear divisions 1 homolog %28S. cerevisiae%29
XM_005691128.1	PKP1	78.3106	25.7497	80.9192	-	-	-	482.662	426.062	453.969	-	2.88102	-	8.57e-05	-	0.00832892	plakophilin 1 %28ectodermal dysplasia%2Fskin fragility syndrome%29
XM_005691119.1	C16H1orf106	4.73207	3.27692	3.19079	-	-	-	16.2282	11.5141	17.2936	-	2.00761	-	0.00362393	-	0.0335444	chromosome 16 open reading frame%2C human C1orf106
XM_005691115.1	KIF14	6.89111	6.92543	7.438	1.65379	2.6756	1.88041	1.85934	3.16482	2.1766	-1.77515	-1.56155	0.000148598	0.000406873	0.0169944	0.0131349	kinesin family member 14
XM_005691111.1	ASPM	8.46679	11.7569	10.9501	2.16469	3.69667	2.35792	1.83838	4.32506	2.19418	-1.92325	-1.89917	0.0022522	0.00377792	0.0384967	0.034299	asp %28abnormal spindle%29 homolog%2C microcephaly associated %28Drosophila%29
XM_005691105.1	PLXNA2	13.5406	15.4126	12.8418	31.0042	39.2161	43.7664	36.5745	41.106	27.3745	1.44746	1.32974	0.00322169	0.00684665	0.0435005	0.0462933	plexin A2
XM_005691104.1	CAMK1G	0.936283	0.818059	0.873437	0.258937	0.120074	0.382179	-	-	-	-1.78752	-	0.00169817	-	0.0340885	-	calcium%2Fcalmodulin-dependent protein kinase IG
XM_005691103.1	LAMB3	5.82016	2.85633	4.18396	-	-	-	24.705	15.5454	17.4046	-	2.1645	-	0.00694906	-	0.0465932	laminin%2C beta 3
XM_005691100.1	LOC102190627	2.39076	1.86361	2.602	10.7993	12.1619	12.5238	-	-	-	2.37169	-	7.41e-05	-	0.0145856	-	zinc transporter 1-like
XM_005691097.1	PTPN14	12.8344	13.0356	13.9145	29.3715	27.2201	31.491	-	-	-	1.14665	-	0.0002277	-	0.019519	-	protein tyrosine phosphatase%2C non-receptor type 14
XM_005691093.1	CACNA1E	0.766168	0.571337	1.06735	-	-	-	0.0668818	0.0607151	0.0391949	-	-3.84983	-	0.0066889	-	0.0455965	calcium channel%2C voltage-dependent%2C R type%2C alpha 1E subunit
XM_005691085.1	TOR3A	11.942	10.4045	9.87578	3.96917	4.73599	3.90554	3.43093	4.07614	5.16153	-1.35341	-1.3468	0.000635125	0.00123139	0.0250499	0.0210834	torsin family 3%2C member A
XM_005691083.1	ASTN1	4.65262	2.88422	3.61471	0.13857	0.0856765	0.181798	-	-	-	-4.77946	-	0.00222633	-	0.0382378	-	astrotactin 1
XM_005691053.1	CRB1	0.285581	0.221295	0.191271	-	-	-	0.0632826	0.0957463	0.0772618	-	-1.56297	-	0.00632736	-	0.044304	crumbs homolog 1 %28Drosophila%29
XM_005691036.1	IRF6	24.7021	8.54342	18.7352	-	-	-	67.4901	58.9871	65.0549	-	1.88154	-	0.000964812	-	0.0190436	interferon regulatory factor 6
XM_005691016.1	DTL	10.0558	13.4404	14.7111	2.74462	4.01501	3.20177	3.08763	4.36367	2.26181	-1.93943	-1.97584	0.00281379	0.00332666	0.0413742	0.0324175	denticleless E3 ubiquitin protein ligase homolog %28Drosophila%29
XM_005690968.1	COLGALT2	8.32207	11.2464	8.54446	-	-	-	2.26272	3.08764	1.88833	-	-1.95744	-	0.00227969	-	0.0273113	collagen beta%281-O%29galactosyltransferase 2
XM_005690967.1	RGL1	41.7782	53.4292	38.4092	18.6118	17.0986	16.3958	19.6814	17.6824	13.7234	-1.35857	-1.38706	0.00410255	0.00485728	0.0480242	0.0385449	ral guanine nucleotide dissociation stimulator-like 1
XM_005690945.1	GLUL	0.433179	0.479524	0.609262	-	-	-	1.7278	1.70646	1.68758	-	1.75073	-	2.42e-05	-	0.00521345	glutamate-ammonia ligase%2C transcript variant X2
XM_005690912.1	BRINP2	2.21067	1.83395	2.03802	0.427965	0.140086	0.445875	0.199789	0.42508	0.347589	-2.58474	-2.64499	0.000328947	0.000180729	0.0211388	0.0103278	bone morphogenetic protein%2Fretinoic acid inducible neural-specific 2
XM_005690911.1	PAPPA2	9.03769	8.64604	5.87194	2.13731	1.79783	0.78253	1.74223	1.24961	0.734449	-2.31993	-2.66026	0.00430188	0.00311883	0.0486126	0.0314625	pappalysin 2
XM_005690894.1	CENPL	1.73937	2.04799	1.7898	0.663247	0.331218	0.502011	0.354285	0.918909	0.407829	-1.89796	-1.73019	0.000551678	0.0031079	0.0240885	0.031416	centromere protein L%2C transcript variant X2
XM_005690875.1	EFHD2	57.4125	51.6384	39.9906	-	-	-	145.512	114.744	104.893	-	1.29278	-	0.00557435	-	0.0414914	EF-hand domain family%2C member D2
XM_005690873.1	PLEKHM2	38.6094	29.6882	37.6995	-	-	-	72.7288	77.1415	82.6578	-	1.13338	-	0.000473417	-	0.0139735	pleckstrin homology domain containing%2C family M %28with RUN domain%29 member 2
XM_005690870.1	SAMD11	0.640382	1.53594	0.966457	-	-	-	14.0611	11.5365	11.1111	-	3.54601	-	0.000306201	-	0.0121554	sterile alpha motif domain containing 11
XM_005690867.1	TNFRSF18	3.24409	1.78502	2.90766	-	-	-	6.50502	6.03	5.90615	-	1.21631	-	0.00183912	-	0.0246936	tumor necrosis factor receptor superfamily%2C member 18
XM_005690858.1	ANKRD65	0.0909404	0.0654355	0.158361	-	-	-	2.00845	1.18909	1.59921	-	3.92984	-	0.00329561	-	0.0322388	ankyrin repeat domain 65
XM_005690855.1	TMEM240	5.99305	5.54433	7.70286	-	-	-	0.54807	0.932879	2.60964	-	-2.23375	-	0.00521416	-	0.0400304	transmembrane protein 240
XM_005690852.1	PRKCZ	8.09373	3.15866	6.86793	-	-	-	16.0706	14.8729	17.6345	-	1.42269	-	0.00382549	-	0.0343364	protein kinase C%2C zeta
XM_005690848.1	LOC102185293	2.7918	1.36599	2.04185	-	-	-	14.0473	14.2365	15.6317	-	2.82447	-	4.15e-05	-	0.00638657	1-phosphatidylinositol 4%2C5-bisphosphate phosphodiesterase eta-2-like
XM_005690843.1	ARHGEF16	0.198813	0.743884	1.10786	-	-	-	7.97992	6.93219	8.72646	-	3.52705	-	0.00024855	-	0.0114407	Rho guanine nucleotide exchange factor %28GEF%29 16
XM_005690834.1	ESPN	1.77348	1.36947	1.69479	4.5219	5.24223	6.63293	-	-	-	1.76103	-	0.00365659	-	0.0453455	-	espin
XM_005690831.1	KLHL21	13.5463	11.8465	10.7663	-	-	-	27.3494	24.9034	21.0607	-	1.01971	-	0.00346463	-	0.0330423	kelch-like family member 21
XM_005690830.1	PHF13	27.5224	22.9729	21.4316	10.1434	9.40737	9.37756	8.26562	9.2539	6.33841	-1.31405	-1.59206	0.00148133	0.00136441	0.032608	0.0217873	PHD finger protein 13
XM_005690825.1	SLC25A33	3.23391	4.33656	2.68773	-	-	-	8.11613	8.48898	11.1153	-	1.43417	-	0.00537768	-	0.0407044	solute carrier family 25 %28pyrimidine nucleotide carrier%29%2C member 33
XM_005690766.1	LOC102185202	2.25455	0.983179	2.77597	-	-	-	13.3174	15.6826	11.4695	-	2.75051	-	0.000990065	-	0.0192804	1-phosphatidylinositol 4%2C5-bisphosphate phosphodiesterase eta-2-like
XM_005690754.1	KCNAB2	11.3663	8.49108	10.1696	4.34475	4.09448	4.50495	4.14789	3.76018	3.39497	-1.21396	-1.40955	0.00249804	0.00192882	0.039968	0.0252843	potassium voltage-gated channel%2C shaker-related subfamily%2C beta member 2
XM_005690722.1	CTNNBIP1	4.58414	3.42535	3.37729	15.701	18.3604	20.4871	16.0837	19.9799	26.7884	2.26018	2.4646	0.000563327	0.00553893	0.0242315	0.0413364	catenin%2C beta interacting protein 1%2C transcript variant X1
XM_005690709.1	CASZ1	8.86004	9.48064	8.99701	-	-	-	40.4066	41.4424	29.0594	-	2.02041	-	0.00217406	-	0.0268038	castor zinc finger 1
XM_005690703.1	LOC102168374	159.802	137.196	152.526	61.8833	63.5311	54.4615	33.7145	47.6567	37.4416	-1.32139	-1.91971	0.000239755	0.000149829	0.019519	0.00956479	procollagen-lysine%2C2-oxoglutarate 5-dioxygenase 1-like
XM_005690671.1	CLCN6	8.37849	9.37925	8.76546	-	-	-	4.3769	5.73489	3.11399	-	-1.0039	-	0.00544835	-	0.0409624	chloride channel%2C voltage-sensitive 6
XM_005690616.1	ATP1B1	4.86423	7.35653	4.15679	22.0595	24.8659	18.6173	-	-	-	2.00072	-	0.00133	-	0.0312638	-	ATPase%2C Na%2B%2FK%2B transporting%2C beta 1 polypeptide
XM_005690613.1	DPT	189.567	231.943	210.257	-	-	-	98.641	91.4276	83.5878	-	-1.20703	-	0.000777297	-	0.0175036	dermatopontin
XM_005690603.1	KIF26B	8.24485	8.44243	8.21042	3.26333	4.01541	3.41767	2.78857	2.36415	1.47923	-1.21889	-1.90851	3.93e-05	0.000100713	0.0126402	0.00880351	kinesin family member 26B
XM_005690599.1	C16H1orf95	0.21134	0.709652	0.674707	9.13735	11.3202	13.4863	15.6261	15.5056	13.2802	4.41089	4.79868	0.00104147	5.23e-05	0.0297408	0.00686539	chromosome 16 open reading frame%2C human C1orf95
XM_005690533.1	PARP1	8.00748	7.41608	9.01988	2.99291	4.55506	2.74357	3.80646	4.54973	2.23071	-1.24799	-1.20717	0.00303302	0.00507735	0.0425983	0.0394143	poly %28ADP-ribose%29 polymerase 1%2C transcript variant X1
XM_005690508.1	CAPN8	1.18185	0.675951	1.55672	3.0506	3.863	3.31918	4.5685	5.08502	5.13715	1.58344	2.11493	0.00288864	0.000266781	0.041569	0.0116692	calpain 8
XM_005690440.1	SLC45A3	0.891416	0.33465	0.911125	-	-	-	6.34532	7.93936	7.04728	-	3.31923	-	0.000212342	-	0.0109617	solute carrier family 45%2C member 3
XM_005690437.1	KLHDC8A	1.48943	1.40431	1.4608	-	-	-	4.24129	4.21585	3.96192	-	1.51197	-	8.39e-06	-	0.00369288	kelch domain containing 8A
XM_005690435.1	CNTN2	7.98115	7.77326	4.64099	-	-	-	0.574783	1.4287	1.06265	-	-2.73375	-	0.00646411	-	0.044753	contactin 2 %28axonal%29
XM_005690433.1	LRRN2	66.6333	55.5433	60.7808	20.0408	16.0154	13.9351	7.09087	8.72313	9.66052	-1.87176	-2.84438	0.000269707	9.02e-05	0.0199778	0.00857782	leucine rich repeat neuronal 2
XM_005690430.1	PLEKHA6	1.73806	1.35146	1.44008	5.48125	6.66896	7.82307	-	-	-	2.14061	-	0.0016881	-	0.0340694	-	pleckstrin homology domain containing%2C family A member 6
XM_005690421.1	YOD1	0.472464	0.63135	0.705201	2.61327	2.7266	3.27851	-	-	-	2.25221	-	0.000469137	-	0.0228936	-	YOD1 deubiquitinase%2C transcript variant X1
XM_005690420.1	C16H1orf116	3.14561	1.24327	2.04448	16.0388	23.7045	28.272	25.3128	28.6753	27.3932	3.40222	3.66105	0.00472933	2.43e-05	0.0499746	0.00521345	chromosome 16 open reading frame%2C human C1orf116
XM_005690412.1	RASSF5	1.05693	1.76002	1.68274	4.29683	3.5513	3.79653	3.74061	5.4292	5.41658	1.37177	1.69673	0.00159205	0.00508114	0.033494	0.0394143	Ras association %28RalGDS%2FAF-6%29 domain family member 5
XM_005690411.1	SRGAP2	32.1365	31.4608	30.9214	-	-	-	16.4895	16.192	9.92287	-	-1.1496	-	0.00133928	-	0.0216826	SLIT-ROBO Rho GTPase activating protein 2
XM_005690407.1	LOC102173110	15.2431	7.56417	11.899	-	-	-	28.6682	25.4292	23.3668	-	1.15834	-	0.00622317	-	0.0438065	ras-related protein Rab-7b-like
XM_005690396.1	TMEM81	2.6987	3.19015	2.55112	1.15684	1.21133	1.46877	-	-	-	-1.13728	-	0.00206727	-	0.0377607	-	transmembrane protein 81
XM_005690371.1	FMOD	206.576	181.544	240.977	-	-	-	34.2292	47.0906	43.2444	-	-2.33639	-	0.000676514	-	0.0164301	fibromodulin
XM_005690367.1	CHI3L1	7.15817	3.8053	5.86042	-	-	-	16.6708	15.3083	18.149	-	1.57511	-	0.000958046	-	0.0189894	chitinase 3-like 1 %28cartilage glycoprotein-39%29%2C transcript variant X1
XM_005690358.1	NCAPD3	24.2534	20.315	24.893	10.8312	10.7822	12.4933	9.59662	13.0093	9.26442	-1.02616	-1.124	0.00155875	0.0025593	0.033494	0.0284453	non-SMC condensin II complex%2C subunit D3
XM_005690328.1	LOC102190715	25.5945	20.7889	33.6261	-	-	-	6.73979	8.9641	5.09791	-	-1.94346	-	0.00723433	-	0.0473775	E3 ubiquitin-protein ligase DTX1-like
XM_005690314.1	LOC102181884	61.662	39.5236	52.9168	-	-	-	180.919	135.792	164.936	-	1.64409	-	0.00175217	-	0.0242539	factor XIIa inhibitor-like
XM_005690281.1	SLC43A3	0.614436	0.638607	0.445817	1.38774	1.2564	1.398	-	-	-	1.25055	-	0.000501912	-	0.0233308	-	solute carrier family 43%2C member 3%2C transcript variant X2
XM_005690209.1	MADD	8.57586	6.58293	7.13952	-	-	-	23.4495	22.8441	19.4068	-	1.55897	-	0.000483754	-	0.0139735	MAP-kinase activating death domain
XM_005690203.1	DGKZ	317.8	251.606	355.589	-	-	-	55.3138	41.1044	53.1534	-	-2.62861	-	0.00109071	-	0.0197969	diacylglycerol kinase%2C zeta
XM_005690201.1	GYLTL1B	4.07509	2.39131	4.51266	12.6377	14.3845	19.0295	11.4352	16.0368	13.7479	2.0685	1.90859	0.00438118	0.00241269	0.0489022	0.0277989	glycosyltransferase-like 1B
XM_005690198.1	ALX4	0.225731	0.0812115	0.196541	5.02543	9.22022	6.98732	-	-	-	5.39822	-	0.00468633	-	0.0498163	-	ALX homeobox 4
XM_005690197.1	EXT2	130.727	97.09	111.884	-	-	-	48.4265	51.3705	46.3876	-	-1.21648	-	0.00280089	-	0.029821	exostosin glycosyltransferase 2
XM_005690195.1	C15H11orf96	6.53664	5.06519	7.00475	34.0693	26.8576	36.3966	25.5896	35.3384	38.0214	2.38698	2.41088	0.000860521	0.00218377	0.0283341	0.0268883	chromosome 15 open reading frame%2C human C11orf96
XM_005690174.1	FAM180B	0.620723	0.714619	0.378318	-	-	-	11.5036	8.11623	14.6705	-	4.32265	-	0.00459303	-	0.0373879	family with sequence similarity 180%2C member B
XM_005690157.1	CKAP5	42.1584	56.7095	49.227	-	-	-	14.6765	25.3403	14.741	-	-1.43538	-	0.00480088	-	0.0383203	cytoskeleton associated protein 5
XM_005690146.1	PHF21A	13.9986	17.5766	15.6518	7.45375	7.57671	7.1157	6.1456	8.05725	7.51512	-1.09256	-1.12072	0.00131417	0.00196609	0.0311979	0.0254926	PHD finger protein 21A
XM_005690145.1	SLC35C1	12.017	8.97764	9.60894	-	-	-	4.23888	5.81214	4.03238	-	-1.11971	-	0.00706268	-	0.0469696	solute carrier family 35 %28GDP-fucose transporter%29%2C member C1
XM_005690143.1	PRDM11	18.2272	14.997	16.8265	4.35383	2.67628	4.03496	1.75777	2.22258	1.04851	-2.17738	-3.31509	0.000261187	0.000112885	0.0198089	0.00892294	PR domain containing 11
XM_005690120.1	LDLRAD3	22.714	26.8623	22.7624	11.28	8.37848	11.2711	7.55083	8.23115	6.27483	-1.22578	-1.71354	0.00119626	0.000355379	0.0308781	0.0125649	low density lipoprotein receptor class A domain containing 3
XM_005690119.1	TRIM44	10.6525	14.4494	14.7689	5.71292	3.38148	4.29598	4.56153	4.91475	4.40471	-1.57414	-1.52222	0.00402735	0.00287296	0.0475213	0.0302493	tripartite motif containing 44
XM_005690115.1	ABTB2	5.11405	5.38928	4.71569	-	-	-	11.1554	9.67487	10.9759	-	1.06343	-	0.000397753	-	0.0130788	ankyrin repeat and BTB %28POZ%29 domain containing 2
XM_005690112.1	DEPDC7	0.046043	0.530078	0.160356	-	-	-	1.63584	2.05694	2.65574	-	3.10771	-	0.00477582	-	0.0382704	DEP domain containing 7
XM_005690104.1	MYO7A	2.80481	3.13594	2.31687	0.904975	0.684359	0.27399	0.262421	0.92469	0.303528	-2.14785	-2.4698	0.00210663	0.00213895	0.037851	0.026544	myosin VIIA
XM_005690103.1	CAPN5	35.8902	34.5349	35.9782	-	-	-	8.72653	10.7147	5.993	-	-2.0647	-	4.85e-05	-	0.00679205	calpain 5
XM_005690101.1	TSKU	68.1703	54.442	63.1389	21.1138	26.6044	26.8463	28.4969	30.5778	31.2399	-1.31681	-1.04034	0.00111166	0.00147882	0.0301471	0.0226642	tsukushi%2C small leucine rich proteoglycan
XM_005690098.1	WNT11	27.7788	17.8419	25.1541	-	-	-	52.9552	60.3455	61.8694	-	1.30745	-	0.00100976	-	0.0193185	wingless-type MMTV integration site family%2C member 11
XM_005690032.1	MPPED2	5.64427	8.18274	4.58676	-	-	-	0.602201	0.820014	0.882273	-	-2.99827	-	0.00740281	-	0.0480589	metallophosphoesterase domain containing 2%2C transcript variant X1
XM_005690019.1	FIBIN	150.56	152.538	137.228	12.4068	10.6024	5.44994	8.08799	10.7241	7.98557	-3.95161	-4.0384	1.26e-05	9.43e-06	0.0108542	0.00369288	fin bud initiation factor homolog %28zebrafish%29
XM_005690012.1	LRRC32	0.0638446	0.0918778	0.0833829	-	-	-	0.245223	0.347832	0.246999	-	1.81284	-	0.00457059	-	0.0372695	leucine rich repeat containing 32%2C transcript variant X2
XM_005690002.1	DGAT2	0.246199	0.0295251	0.142908	-	-	-	2.04887	1.56487	1.21225	-	3.52707	-	0.00421686	-	0.0361314	diacylglycerol O-acyltransferase 2%2C transcript variant X1
XM_005689968.1	PPME1	2.30136	3.06834	2.29843	-	-	-	5.6546	8.03911	7.14176	-	1.44209	-	0.00407019	-	0.0354311	protein phosphatase methylesterase 1%2C transcript variant X2
XM_005689951.1	ATG16L2	6.98899	6.02516	6.25744	-	-	-	2.638	3.49636	2.90639	-	-1.09196	-	0.00090149	-	0.0184899	autophagy related 16-like 2 %28S. cerevisiae%29
XM_005689950.1	STARD10	6.67585	1.97794	6.06901	-	-	-	32.806	24.3898	36.2548	-	2.66615	-	0.00235204	-	0.0275481	StAR-related lipid transfer %28START%29 domain containing 10
XM_005689947.1	INPPL1	79.162	84.1012	67.7953	-	-	-	23.6152	32.4534	23.0305	-	-1.54652	-	0.000891532	-	0.018423	inositol polyphosphate phosphatase-like 1
XM_005689890.1	FOLR2	31.5355	33.3621	34.6558	15.4275	8.33996	7.71184	-	-	-	-1.66107	-	0.000998322	-	0.0293648	-	folate receptor 2 %28fetal%29
XM_005689877.1	NUMA1	2.37447	1.88327	1.63279	0.378709	0.569234	0.565383	0.388644	0.573315	0.531435	-1.96067	-1.9798	0.00299901	0.00286136	0.0423616	0.0301496	nuclear mitotic apparatus protein 1%2C transcript variant X3
XM_005689855.1	STIM1	0.946745	0.77328	0.846596	-	-	-	2.85014	2.56504	2.6458	-	1.65108	-	4.95e-05	-	0.00679205	stromal interaction molecule 1%2C transcript variant X2
XM_005689838.1	LOC102184170	15.7966	8.99578	14.4158	-	-	-	1.54117	1.47271	0.891292	-	-3.3277	-	0.00485814	-	0.0385449	olfactory receptor 51E1-like
XM_005689816.1	LOC102176710	2183.07	1879.08	1453.73	167.983	487.916	194.878	1.35592	7.07768	11.3233	-2.69674	-8.12509	0.00270527	0.000977828	0.0409149	0.0192202	hemoglobin fetal subunit beta-like
XM_005689784.1	DCHS1	89.1755	72.934	96.6483	28.4047	21.8619	18.739	13.9853	13.7067	9.82311	-1.90682	-2.78606	0.00111449	0.000492481	0.0301471	0.0140999	dachsous 1 %28Drosophila%29
XM_005689770.1	SMPD1	37.4994	29.257	34.5425	-	-	-	71.7507	62.6464	81.4671	-	1.09151	-	0.00301906	-	0.0308702	sphingomyelin phosphodiesterase 1%2C acid lysosomal
XM_005689749.1	SYT9	4.35856	5.88754	5.96015	-	-	-	2.3879	2.33089	3.04705	-	-1.06134	-	0.00786448	-	0.0495326	synaptotagmin IX
XM_005689745.1	ST5	39.1906	33.0178	36.3141	-	-	-	14.3494	17.1644	14.4316	-	-1.24	-	0.000485774	-	0.0139927	suppression of tumorigenicity 5
XM_005689744.1	TMEM9B	16.0162	18.9641	13.9892	-	-	-	29.0065	36.7256	40.1081	-	1.11193	-	0.00616034	-	0.0435216	TMEM9 domain family%2C member B
XM_005689742.1	DENND5A	63.6139	66.9396	62.3779	-	-	-	28.2078	33.8339	25.9369	-	-1.13286	-	0.000208821	-	0.0109203	DENN%2FMADD domain containing 5A
XM_005689728.1	PPFIBP2	0.228101	0.164129	0.0993023	-	-	-	0.903501	0.869904	0.782187	-	2.3783	-	0.000186659	-	0.0104973	PTPRF interacting protein%2C binding protein 2 %28liprin beta 2%29%2C transcript variant X3
XM_005689722.1	TUB	12.5329	13.2074	14.8646	4.10743	5.27112	4.60552	2.51113	3.60219	1.77009	-1.53787	-2.36476	0.000324454	0.000236624	0.0211388	0.0112217	tubby bipartite transcription factor
XM_005689673.1	MICALCL	0.107523	0.116051	0.124825	5.23857	7.67377	7.86844	8.50071	10.2319	9.6432	5.89836	6.34777	0.00129288	5.15e-05	0.0309825	0.0068326	MICAL C-terminal like
XM_005689672.1	MICAL2	0.20967	0.452598	0.456391	3.01889	4.87029	5.01739	5.86379	4.11228	3.65022	3.52826	3.60655	0.00373943	0.00356859	0.0458235	0.0333237	microtubule associated monooxygenase%2C calponin and LIM domain containing 2%2C transcript variant X2
XM_005689671.1	MICAL2	0.100724	0.253662	0.109623	-	-	-	1.13644	0.768253	0.974187	-	2.63328	-	0.00237631	-	0.0277178	microtubule associated monooxygenase%2C calponin and LIM domain containing 2%2C transcript variant X1
XM_005689660.1	SPON1	88.4813	132.853	97.1885	-	-	-	16.2893	14.0057	8.46319	-	-3.03882	-	0.00248166	-	0.0280067	spondin 1%2C extracellular matrix protein
XM_005689655.1	PLEKHA7	2.23213	1.80687	1.74913	16.0424	20.4389	19.4791	20.5227	23.1056	17.7617	3.27324	3.40684	0.000239324	0.0002806	0.019519	0.0117023	pleckstrin homology domain containing%2C family A member 7
XM_005689645.1	TRIM29	68.8828	20.4477	81.0776	-	-	-	614.243	431.264	475.057	-	3.15754	-	0.00150485	-	0.022785	tripartite motif containing 29
XM_005689633.1	SCN2B	13.1118	12.9825	15.5144	-	-	-	2.47504	1.2211	0.788289	-	-3.21389	-	0.000214219	-	0.0109997	sodium channel%2C voltage-gated%2C type II%2C beta subunit
XM_005689629.1	BACE1	41.1889	40.1955	35.7576	-	-	-	18.8062	20.0599	16.1713	-	-1.08978	-	0.000516041	-	0.0144247	beta-site APP-cleaving enzyme 1
XM_005689578.1	ABCC8	5.33258	5.40543	4.25326	-	-	-	1.92487	2.73559	2.51891	-	-1.06219	-	0.00423408	-	0.03618	ATP-binding cassette%2C sub-family C %28CFTR%2FMRP%29%2C member 8
XM_005689554.1	OAF	156.777	115.754	129.491	-	-	-	61.8668	60.989	57.122	-	-1.15946	-	0.00366513	-	0.0337119	OAF homolog %28Drosophila%29
XM_005689527.1	LOC102172082	37.6605	41.9736	41.7206	-	-	-	18.4662	22.1767	14.2036	-	-1.14576	-	0.00118927	-	0.020731	40S ribosomal protein S25-like%2C transcript variant X1
XM_005689516.1	KMT2A	15.4354	17.0663	15.5356	6.95421	6.18588	5.48635	4.2251	7.87007	3.07709	-1.3668	-1.66272	0.000132126	0.00205459	0.0162729	0.0260212	lysine %28K%29-specific methyltransferase 2A
XM_005689491.1	TAGLN	105.728	104.744	93.9751	462.386	488.054	468.893	473.829	618.362	677.083	2.22095	2.5389	1.69e-06	0.0012811	0.00448219	0.021313	transgelin
XM_005689477.1	CADM1	0.274595	0.148187	0.199238	0.819535	0.760067	0.566658	0.483404	0.523607	0.643842	1.78679	1.40818	0.00388704	0.0048022	0.0466364	0.0383203	cell adhesion molecule 1%2C transcript variant X2
XM_005689472.1	C15H11orf71	9.28281	6.67937	6.66798	-	-	-	18.273	21.6202	21.6293	-	1.44287	-	0.000789773	-	0.0175159	chromosome 15 open reading frame%2C human C11orf71
XM_005689464.1	ZW10	2.36168	2.36949	2.05628	-	-	-	0.415225	0.978593	0.350964	-	-1.95982	-	0.00170054	-	0.0239819	zw10 kinetochore protein%2C transcript variant X2
XM_005689460.1	NCAM1	1.96619	1.10037	1.6274	-	-	-	0.18647	0.105798	0.307342	-	-2.96871	-	0.00618212	-	0.0435885	neural cell adhesion molecule 1%2C transcript variant X3
XM_005689459.1	NCAM1	3.38814	4.77425	4.7323	-	-	-	0.903725	0.692211	0.430309	-	-2.6699	-	0.0015913	-	0.0233216	neural cell adhesion molecule 1%2C transcript variant X2
XM_005689457.1	C15H11orf34	5.79861	1.4835	3.87072	17.0878	14.2284	20.1276	-	-	-	2.20559	-	0.00313185	-	0.0430286	-	chromosome 15 open reading frame%2C human C11orf34
XM_005689429.1	PPP2R1B	9.25794	10.4918	8.46379	46.016	69.3553	60.3124	48.1382	51.3965	33.5374	2.63852	2.23775	0.00196386	0.0031901	0.0373115	0.031883	protein phosphatase 2%2C regulatory subunit A%2C beta
XM_005689422.1	C15H11orf65	2.98272	4.17315	3.53482	0.882179	0.966924	1.10478	-	-	-	-1.85567	-	0.00180794	-	0.0353914	-	chromosome 15 open reading frame%2C human C11orf65
XM_005689421.1	EXPH5	0.703946	0.675359	0.676761	1.5899	1.72468	1.75997	-	-	-	1.30339	-	4.42e-05	-	0.0127287	-	exophilin 5
XM_005689378.1	KIAA1377	0.335904	0.382687	0.292466	0.0812847	0.125644	0.159963	0.107515	0.0915018	0.0590694	-1.46243	-1.96994	0.00343054	0.00107321	0.0440982	0.0197486	KIAA1377 ortholog
XM_005689347.1	GPR83	18.5332	16.6451	20.9581	1.81554	2.00452	1.9991	0.814764	0.97321	1.6963	-3.27005	-4.01001	0.000178326	0.000162589	0.017845	0.00988052	G protein-coupled receptor 83
XM_005689331.1	COL14A1	132.993	165.024	126.231	-	-	-	57.2627	85.3975	60.2944	-	-1.06375	-	0.00779653	-	0.0492151	collagen%2C type XIV%2C alpha 1
XM_005689323.1	CA2	2.72821	3.51716	3.86005	29.4337	38.8804	36.9196	30.1814	21.9857	38.8608	3.3804	3.17118	0.000396131	0.00524699	0.0216375	0.0401777	carbonic anhydrase II
XM_005689319.1	RUNX1T1	22.4074	34.5788	29.2508	-	-	-	3.75391	8.65799	4.62786	-	-2.3394	-	0.00383998	-	0.0343364	runt-related transcription factor 1%3B translocated to%2C 1 %28cyclin D-related%29
XM_005689294.1	MAL2	2.77873	1.86612	3.70975	15.4209	18.1268	17.4674	-	-	-	2.61028	-	0.000127552	-	0.0162729	-	mal%2C T-cell differentiation protein 2
XM_005689281.1	ENPP2	55.9845	77.7526	74.0061	24.2702	19.9277	15.9938	26.7548	30.9865	21.9048	-1.78717	-1.38312	0.00231783	0.00407944	0.0390951	0.0354333	ectonucleotide pyrophosphatase%2Fphosphodiesterase 2
XM_005689231.1	ESRP1	8.06958	3.46449	6.93238	25.1774	40.6882	35.5082	35.7214	44.6087	42.5527	2.45671	2.7343	0.00439491	0.00032458	0.0489418	0.0123657	epithelial splicing regulatory protein 1
XM_005689214.1	MATN2	8.65174	11.2919	11.3826	2.69463	2.25409	1.66364	2.07037	2.40882	2.59171	-2.24414	-2.14741	0.00095005	0.000880998	0.0289434	0.0183072	matrilin 2%2C transcript variant X1
XM_005689210.1	NIPAL2	7.36244	7.1754	5.22805	12.5895	15.4663	12.7312	15.3617	19.05	16.8349	1.0451	1.37444	0.00377048	0.00117297	0.0459491	0.0204973	NIPA-like domain containing 2
XM_005689171.1	ZFPM2	4.26704	5.81663	5.04079	-	-	-	0.864768	1.96258	1.28204	-	-1.87989	-	0.00261642	-	0.0287115	zinc finger protein%2C FOG family member 2
XM_005689136.1	EXT1	53.3705	67.5462	60.4147	26.319	28.4375	25.8971	21.0871	26.0331	24.9788	-1.16882	-1.33058	0.00129069	0.00112384	0.0309825	0.0200088	exostosin glycosyltransferase 1
XM_005689130.1	LOC100861279	4.21399	11.3967	6.32596	-	-	-	297.621	183.666	253.896	-	5.06669	-	0.0020263	-	0.0258703	adipocyte fatty acid-binding protein
XM_005689106.1	CRISPLD1	26.9798	42.249	24.0473	-	-	-	0.749936	3.7134	3.02147	-	-3.63947	-	0.00746037	-	0.0481678	cysteine-rich secretory protein LCCL domain containing 1
XM_005689101.1	SBSPON	3.64673	2.58481	2.70125	11.696	9.4303	12.3379	-	-	-	1.90543	-	0.000976587	-	0.0292946	-	somatomedin B and thrombospondin%2C type 1 domain containing
XM_005689093.1	LOC102191152	3.88682	4.24171	3.21499	0.940565	0.697852	0.308496	0.0622042	1.76465	0.501238	-2.54261	-2.28465	0.000890006	0.00712005	0.0285374	0.047033	25-hydroxycholesterol 7-alpha-hydroxylase-like
XM_005689045.1	SLCO5A1	1.07344	0.917205	0.321278	4.09121	4.51707	5.14385	-	-	-	2.57249	-	0.000566164	-	0.024281	-	solute carrier organic anion transporter family%2C member 5A1
XM_005689044.1	SULF1	43.7466	53.6821	36.1813	5.14812	2.51845	1.80914	1.82395	3.34339	2.15834	-3.81765	-4.18892	0.00132001	0.00116521	0.0312638	0.0204373	sulfatase 1
XM_005689002.1	SDCBP	5.34711	4.2672	4.7403	-	-	-	1.96043	2.75426	1.84641	-	-1.1295	-	0.00357409	-	0.0333237	syndecan binding protein %28syntenin%29%2C transcript variant X2
XM_005688999.1	FAM110B	22.8882	20.803	23.6577	-	-	-	12.3385	7.58391	10.3566	-	-1.15334	-	0.00159103	-	0.0233216	family with sequence similarity 110%2C member B
XM_005688996.1	SDR16C5	6.7935	5.05299	9.3045	-	-	-	82.6046	129.583	115.975	-	3.95561	-	0.001868	-	0.0248693	short chain dehydrogenase%2Freductase family 16C%2C member 5
XM_005688990.1	PLAG1	1.18114	0.672823	1.15695	-	-	-	0.0945143	0.0536249	0.0692355	-	-3.79195	-	0.00495974	-	0.0389415	pleiomorphic adenoma gene 1%2C transcript variant X1
XM_005688973.1	ATP6V1H	1.91273	1.52117	2.67339	-	-	-	4.64001	4.05862	4.42578	-	1.10365	-	0.00348236	-	0.0330836	ATPase%2C H%2B transporting%2C lysosomal 50%2F57kDa%2C V1 subunit H%2C transcript variant X1
XM_005688961.1	SNAI2	87.7999	78.2717	102.846	30.0442	36.5932	31.5243	32.0123	35.2298	32.1768	-1.45393	-1.43557	0.00155505	0.00144674	0.033494	0.0225063	snail family zinc finger 2
XM_005688954.1	MCM4	106.578	93.1592	117.323	33.1742	53.4202	48.2567	39.7195	46.4374	43.0642	-1.23339	-1.29491	0.00279464	0.000990486	0.0412188	0.0192804	minichromosome maintenance complex component 4
XM_005688950.1	WDYHV1	35.9121	36.7975	33.1116	14.2671	21.6388	15.2018	13.215	18.8998	14.3775	-1.05002	-1.18657	0.00208164	0.000657174	0.0378264	0.0161973	WDYHV motif containing 1
XM_005688946.1	LOC102172644	4.64427	5.89298	5.97859	-	-	-	13.8583	14.2292	14.1914	-	1.35609	-	4.33e-05	-	0.0065235	uncharacterized LOC102172644
XM_005688941.1	ASAP1	20.412	18.6085	22.2675	8.81467	10.4495	9.40184	6.38041	7.13596	4.8084	-1.09626	-1.74181	0.000720176	0.000340939	0.0260094	0.0124319	ArfGAP with SH3 domain%2C ankyrin repeat and PH domain 1
XM_005688937.1	KCNQ3	0.414236	0.298061	0.541004	1.87115	2.07626	2.33433	-	-	-	2.32543	-	0.000377125	-	0.0216375	-	potassium voltage-gated channel%2C KQT-like subfamily%2C member 3
XM_005688936.1	NDRG1	43.0292	29.3791	36.9474	135.996	157.286	191.724	176.914	118.897	130.558	2.14898	1.96308	0.00169598	0.0043365	0.0340885	0.036538	N-myc downstream regulated 1
XM_005688934.1	KHDRBS3	6.04224	7.97068	5.16859	-	-	-	2.08667	2.19458	1.6777	-	-1.68659	-	0.0063803	-	0.0444332	KH domain containing%2C RNA binding%2C signal transduction associated 3
XM_005688933.1	COL22A1	2.60995	3.78355	3.24157	0.278637	0.0861393	0.109668	0.405408	0.0418213	0.0539959	-4.34399	-4.26476	0.000894732	0.00106495	0.0285374	0.0197288	collagen%2C type XXII%2C alpha 1
XM_005688921.1	GPIHBP1	12.1278	8.931	9.98203	-	-	-	4.27609	5.57495	3.06576	-	-1.26492	-	0.00704093	-	0.046869	glycosylphosphatidylinositol anchored high density lipoprotein binding protein 1
XM_005688918.1	MROH6	0.0745355	0.160894	0.259588	2.52514	2.74338	2.48466	-	-	-	3.96924	-	1.5e-05	-	0.0108542	-	maestro heat-like repeat family member 6
XM_005688917.1	NAPRT1	8.72095	5.72141	8.59819	-	-	-	20.6891	19.4942	26.1163	-	1.52482	-	0.00310135	-	0.0313722	nicotinate phosphoribosyltransferase domain containing 1
XM_005688913.1	LOC102183805	10.6459	11.5103	13.9766	-	-	-	3.21127	3.27958	2.54842	-	-1.99903	-	0.00091469	-	0.0185897	zinc finger protein 679-like
XM_005688910.1	FAM83H	22.0314	6.8123	16.979	-	-	-	94.627	61.9611	78.721	-	2.36042	-	0.00376465	-	0.0342004	family with sequence similarity 83%2C member H
XM_005688889.1	TONSL	15.6785	13.0033	18.3831	-	-	-	7.40939	7.33547	8.46402	-	-1.01998	-	0.00757108	-	0.0484912	tonsoku-like%2C DNA repair protein
XM_005688882.1	RECQL4	10.1428	10.4163	11.6457	4.01325	5.57254	5.39908	-	-	-	-1.10377	-	0.00105519	-	0.0297408	-	RecQ protein-like 4
XM_005688881.1	C14H8orf82	2.98624	4.67664	5.65899	12.7524	12.9309	13.7191	-	-	-	1.56449	-	0.000480967	-	0.0231025	-	chromosome 14 open reading frame%2C human C8orf82
XM_005688876.1	PRKDC	6.64892	6.14356	7.99511	-	-	-	2.80553	3.80591	1.89034	-	-1.28989	-	0.00634964	-	0.0443535	protein kinase%2C DNA-activated%2C catalytic polypeptide
XM_005688865.1	FBXO32	2.0871	1.95229	1.75664	-	-	-	12.5591	12.053	11.8426	-	2.65297	-	1.62e-06	-	0.00229997	F-box protein 32
XM_005688855.1	NDUFB9	55.0645	59.1203	58.0714	-	-	-	103.017	140.358	124.032	-	1.09282	-	0.00392768	-	0.0347894	NADH dehydrogenase %28ubiquinone%29 1 beta subcomplex%2C 9%2C 22kDa
XM_005688848.1	NSMCE2	1.06594	1.71098	1.21367	-	-	-	0.15747	0.178688	0.115353	-	-3.14377	-	0.00383775	-	0.0343364	non-SMC element 2%2C MMS21 homolog %28S. cerevisiae%29%2C transcript variant X1
XM_005688826.1	WISP1	101.864	73.1934	106.565	13.19	19.9857	19.0801	4.99601	5.47637	4.1577	-2.4301	-4.26675	0.00199006	0.00103754	0.037437	0.0195013	WNT1 inducible signaling pathway protein 1
XM_005688824.1	ST3GAL1	1.05933	0.681995	0.728163	-	-	-	0.0803053	0.182252	0.0392179	-	-3.03266	-	0.0046074	-	0.0374618	ST3 beta-galactoside alpha-2%2C3-sialyltransferase 1%2C transcript variant X2
XM_005688823.1	ST3GAL1	0.630991	0.592206	0.836035	0.159331	0.246283	0.209036	0.263434	0.119572	0.0771904	-1.74427	-2.16178	0.00378998	0.00483303	0.045971	0.038458	ST3 beta-galactoside alpha-2%2C3-sialyltransferase 1%2C transcript variant X1
XM_005688815.1	PTK2	2.04441	2.02848	2.02362	0.916539	0.927309	0.881351	0.743915	1.12554	0.52981	-1.16162	-1.34539	2.02e-07	0.00211277	0.00291401	0.0263849	protein tyrosine kinase 2%2C transcript variant X4
XM_005688799.1	ZNF696	7.98189	9.82915	7.043	-	-	-	3.395	3.32713	3.08988	-	-1.34086	-	0.00368117	-	0.0337355	zinc finger protein 696
XM_005688763.1	COL19A1	2.92986	4.12623	3.75017	0.0969562	0.224802	0.095402	-	-	-	-4.69512	-	0.000624015	-	0.0249088	-	collagen%2C type XIX%2C alpha 1
XM_005688749.1	LOC102179785	0.24943	0.933271	0.34748	-	-	-	1.53287	1.6307	1.54397	-	1.62127	-	0.007988	-	0.0498856	uncharacterized LOC102179785
XM_005688746.1	LOC102178921	0.764218	0.161731	0.156563	-	-	-	5.61162	3.62473	4.8064	-	3.69737	-	0.00211421	-	0.0263849	1%2C25-dihydroxyvitamin D%283%29 24-hydroxylase%2C mitochondrial-like
XM_005688737.1	BCAS4	38.3484	35.3586	32.2946	12.3731	19.0001	15.3682	7.44517	11.0742	11.8659	-1.18131	-1.80264	0.00159464	0.000340133	0.033494	0.0124319	breast carcinoma amplified sequence 4
XM_005688735.1	FAM65C	19.9719	17.9909	22.3036	5.56225	4.0352	3.5271	2.47692	5.14826	2.82047	-2.19909	-2.52845	0.000347281	0.00038097	0.0212623	0.0128588	family with sequence similarity 65%2C member C
XM_005688730.1	B4GALT5	16.2869	17.6893	13.1774	-	-	-	3.31965	8.11989	6.26859	-	-1.41296	-	0.00707369	-	0.0469767	UDP-Gal:betaGlcNAc beta 1%2C4- galactosyltransferase%2C polypeptide 5
XM_005688728.1	PREX1	37.4158	33.0742	37.3496	12.0722	11.3878	11.5349	7.15405	9.1909	6.25644	-1.62367	-2.2544	7.48e-05	7.14e-05	0.0145856	0.00801668	phosphatidylinositol-3%2C4%2C5-trisphosphate-dependent Rac exchange factor 1
XM_005688727.1	SULF2	252.807	215.843	250.614	83.0769	109.343	97.8497	104.745	80.7439	82.2508	-1.30913	-1.42569	0.000544317	0.000456907	0.0240885	0.0138389	sulfatase 2
XM_005688725.1	SLC2A10	12.8157	13.7232	10.8289	6.56877	4.68799	3.53208	2.56779	5.22284	3.83301	-1.33729	-1.68473	0.00361506	0.0017132	0.0450918	0.0240201	solute carrier family 2 %28facilitated glucose transporter%29%2C member 10
XM_005688703.1	MATN4	8.14219	8.26332	7.82996	160.507	119.95	173.502	70.424	40.3208	63.8123	4.22737	2.84851	0.000887821	0.00538021	0.0285374	0.0407044	matrilin 4
XM_005688698.1	WISP2	0.165083	0.237568	0.383294	-	-	-	2.43061	1.73882	2.28371	-	3.0375	-	0.00101052	-	0.0193185	WNT1 inducible signaling pathway protein 2
XM_005688693.1	CHD6	10.9036	12.0408	12.3339	-	-	-	4.60335	7.21685	4.01867	-	-1.15531	-	0.00382556	-	0.0343364	chromodomain helicase DNA binding protein 6
XM_005688692.1	EMILIN3	184.705	120.693	202.375	-	-	-	19.2397	15.966	21.6841	-	-3.15794	-	0.00378049	-	0.0343003	elastin microfibril interfacer 3
XM_005688689.1	MAFB	24.7027	16.7291	21.5083	-	-	-	53.301	39.8998	44.769	-	1.1323	-	0.00534163	-	0.0405689	v-maf avian musculoaponeurotic fibrosarcoma oncogene homolog B
XM_005688681.1	SAMHD1	15.5787	18.0199	14.0542	5.96741	7.23376	5.23828	-	-	-	-1.36977	-	0.00166826	-	0.0338636	-	SAM domain and HD domain 1
XM_005688680.1	SOGA1	23.4945	22.0237	21.8631	8.23215	8.5816	7.7796	5.25759	6.43059	1.54687	-1.45408	-2.34799	1.5e-05	0.000319408	0.0108542	0.0123216	suppressor of glucose%2C autophagy associated 1
XM_005688673.1	FAM83C	3.49322	1.05073	2.01935	24.8052	38.2993	43.9882	35.1102	30.887	38.5291	4.0283	3.9933	0.00427109	0.00014822	0.0483856	0.00956479	family with sequence similarity 83%2C member C
XM_005688668.1	TP53INP2	7.38046	6.18085	5.24401	-	-	-	34.5816	33.5393	41.4624	-	2.54282	-	0.000293855	-	0.0118986	tumor protein p53 inducible nuclear protein 2
XM_005688645.1	PTGIS	26.7495	26.3093	22.9813	11.1371	8.69808	4.13681	7.92027	9.01025	10.2084	-1.66541	-1.48639	0.00185432	0.000278302	0.0360118	0.0117023	prostaglandin I2 %28prostacyclin%29 synthase
XM_005688625.1	ELMO2	2.57862	1.91341	2.24516	-	-	-	0.490056	0.731696	0.37788	-	-2.07441	-	0.00143294	-	0.0224272	engulfment and cell motility 2%2C transcript variant X2
XM_005688615.1	CTSA	13.456	10.2116	10.7091	19.9441	24.2536	26.0324	31.5451	28.6365	30.2438	1.03066	1.3953	0.00446783	0.000141878	0.0492329	0.00956479	cathepsin A%2C transcript variant X1
XM_005688590.1	SLPI	0.953506	0.914784	2.90571	-	-	-	15.565	17.4891	26.4928	-	3.64076	-	0.00600361	-	0.0428993	secretory leukocyte peptidase inhibitor
XM_005688572.1	FITM2	15.1926	10.7609	10.8166	-	-	-	36.5977	45.5239	33.8409	-	1.65705	-	0.00229888	-	0.0273707	fat storage-inducing transmembrane protein 2
XM_005688549.1	BPI	0.457621	0.146346	0.531259	-	-	-	2.63654	4.76472	3.32625	-	3.24026	-	0.00742498	-	0.0480865	bactericidal%2Fpermeability-increasing protein
XM_005688541.1	NNAT	9.95275	12.9368	12.8588	3.10768	4.32326	3.66943	1.84973	0.34983	0.451668	-1.68727	-3.75314	0.00140334	0.000545332	0.0317142	0.0148825	neuronatin%2C transcript variant X2
XM_005688540.1	NNAT	31.2574	20.3145	28.5323	-	-	-	2.90462	6.59202	7.44714	-	-2.24112	-	0.00414429	-	0.035752	neuronatin%2C transcript variant X1
XM_005688539.1	SRC	30.3137	25.9172	32.7161	-	-	-	16.657	14.3173	11.2695	-	-1.07421	-	0.00353316	-	0.0332181	v-src avian sarcoma %28Schmidt-Ruppin A-2%29 viral oncogene homolog
XM_005688525.1	DSN1	4.09399	4.10531	4.55052	1.72845	2.1895	1.61778	-	-	-	-1.20363	-	0.000478964	-	0.0230832	-	DSN1%2C MIS12 kinetochore complex component%2C transcript variant X1
XM_005688520.1	TGIF2	28.0454	24.3076	27.8807	-	-	-	9.55962	9.82249	8.92431	-	-1.50308	-	0.000156792	-	0.00985574	TGFB-induced factor homeobox 2
XM_005688518.1	LOC102178087	90.7476	91.2066	68.3011	183.974	183.84	175.891	-	-	-	1.11943	-	0.000259191	-	0.019772	-	myosin regulatory light chain 2%2C smooth muscle major isoform-like
XM_005688500.1	LOC102173760	0.0620419	0.0446418	0.0135048	-	-	-	0.461704	0.30421	0.272755	-	3.11137	-	0.00703156	-	0.0468286	fer-1-like protein 4-like
XM_005688493.1	EIF6	0.797254	0.286829	0.277663	-	-	-	3.52153	5.38597	4.71069	-	3.322	-	0.00202444	-	0.0258703	eukaryotic translation initiation factor 6%2C transcript variant X3
XM_005688490.1	PROCR	0.272887	0.29453	0.237598	3.3678	4.59327	5.19814	2.62035	3.04776	3.31115	4.03091	3.47951	0.00157271	0.00017467	0.033494	0.0102715	protein C receptor%2C endothelial%2C transcript variant X2
XM_005688474.1	AHCY	29.926	19.8988	33.6558	-	-	-	112.677	93.6508	98.3909	-	1.86797	-	0.000469588	-	0.0139735	adenosylhomocysteinase%2C transcript variant X1
XM_005688435.1	FAM210B	21.7228	19.4915	19.3326	-	-	-	47.2259	60.0007	57.1895	-	1.44122	-	0.000935475	-	0.0187518	family with sequence similarity 210%2C member B
XM_005688433.1	TFAP2C	2.21502	1.31795	1.37226	-	-	-	12.7616	12.1605	11.8952	-	2.90799	-	1.05e-05	-	0.00369288	transcription factor AP-2 gamma %28activating enhancer binding protein 2 gamma%29
XM_005688425.1	APCDD1L	0.967065	1.17758	0.6477	20.0896	31.6207	36.3468	19.465	17.4677	18.6282	4.97889	4.31452	0.00417097	8.02e-06	0.0482239	0.00369288	adenomatosis polyposis coli down-regulated 1-like
XM_005688414.1	LSM14B	61.7033	59.0921	59.6742	23.7124	31.0325	21.2389	17.2683	20.6838	16.023	-1.24799	-1.74139	0.000333359	1.24e-05	0.0211388	0.00390294	LSM14B%2C SCD6 homolog B %28S. cerevisiae%29
XM_005688408.1	COL20A1	5.17587	3.45216	4.97984	0.640548	0.509201	0.20259	0.090777	0.23177	0.232742	-3.33091	-4.61506	0.00187828	0.0013521	0.0363303	0.0217072	collagen%2C type XX%2C alpha 1
XM_005688401.1	ZBTB46	4.90106	5.33279	4.9438	-	-	-	1.4348	3.25628	2.18619	-	-1.14204	-	0.00714552	-	0.0471444	zinc finger and BTB domain containing 46
XM_005688377.1	C13H20orf112	2.39232	1.63234	2.62165	-	-	-	0.673312	0.674151	0.348161	-	-1.97074	-	0.00656808	-	0.0451201	chromosome 13 open reading frame%2C human C20orf112%2C transcript variant X1
XM_005688374.1	POFUT1	23.7582	28.478	22.2733	13.5665	13.2299	10.1474	10.0846	13.7404	9.69841	-1.01209	-1.15226	0.00443157	0.00384497	0.0491601	0.0343364	protein O-fucosyltransferase 1%2C transcript variant X1
XM_005688370.1	HCK	1.33138	0.660677	1.3191	2.84405	2.88496	2.84219	4.80514	3.00144	3.93977	1.37216	1.82681	0.00138982	0.00766337	0.0316887	0.0486583	hemopoietic cell kinase
XM_005688361.1	TPX2	0.745564	1.01545	0.695519	-	-	-	0.15341	0.174082	0.262218	-	-2.05855	-	0.0040352	-	0.0352787	TPX2%2C microtubule-associated%2C transcript variant X2
XM_005688338.1	ZCCHC3	53.6536	49.2288	54.685	22.8641	21.7352	18.7614	14.5001	14.6155	14.212	-1.31431	-1.86261	0.000110743	2.23e-05	0.0162008	0.00510265	zinc finger%2C CCHC domain containing 3
XM_005688318.1	GCNT7	0.384165	0.380081	0.125432	1.20852	1.55192	1.05194	-	-	-	2.09934	-	0.00465565	-	0.0497727	-	glucosaminyl %28N-acetyl%29 transferase family member 7
XM_005688303.1	LOC102189140	25.2006	27.8674	21.4221	11.5546	13.8119	9.53762	6.87745	10.6223	8.39668	-1.09365	-1.52429	0.00415649	0.00170067	0.0482239	0.0239819	guanine nucleotide-binding protein G%28s%29 subunit alpha isoforms short-like%2C transcript variant X3
XM_005688252.1	OPRL1	1.15349	1.5261	1.45789	0.108051	0.267228	0.531594	0.428756	0.162176	0.392601	-2.18978	-2.07271	0.00307381	0.0017632	0.0429915	0.0243311	opiate receptor-like 1
XM_005688242.1	EBF4	23.5984	17.8689	18.099	6.4321	7.64791	4.94959	4.13116	5.10554	4.76408	-1.64625	-2.08899	0.00263942	0.00131261	0.0406636	0.0215555	early B-cell factor 4
XM_005688237.1	C13H20orf194	8.22889	10.519	9.47906	-	-	-	2.0803	4.28481	1.97211	-	-1.75943	-	0.0027155	-	0.0293547	chromosome 13 open reading frame%2C human C20orf194
XM_005688200.1	HSPA12B	13.5806	10.7897	15.109	-	-	-	3.68274	4.11047	3.69283	-	-1.78121	-	0.00184	-	0.0246936	heat shock 70kD protein 12B%2C transcript variant X2
XM_005688178.1	BMP2	1.08354	1.60517	1.10991	7.86611	8.55413	11.261	15.2089	10.6605	18.0231	2.86536	3.53043	0.00162271	0.00341868	0.033494	0.0329318	bone morphogenetic protein 2
XM_005688158.1	PRND	30.5137	45.0041	24.8495	-	-	-	1.02041	0.165415	0.106784	-	-6.27886	-	0.00534079	-	0.0405689	prion protein 2 %28dublet%29
XM_005688154.1	DIP2C	18.6129	23.2081	20.5051	11.453	8.72223	8.46287	6.28167	9.97934	5.76998	-1.1219	-1.5003	0.00238598	0.00203252	0.0395563	0.0258733	DIP2 disco-interacting protein 2 homolog C %28Drosophila%29
XM_005688144.1	PFKP	41.9239	38.5517	20.4986	-	-	-	76.7206	98.223	96.3916	-	1.42609	-	0.00404542	-	0.0353028	phosphofructokinase%2C platelet
XM_005688132.1	ASB13	3.19682	1.88202	2.21409	-	-	-	20.4414	14.2499	15.4852	-	2.78244	-	0.00178187	-	0.0243826	ankyrin repeat and SOCS box containing 13
XM_005688117.1	PAX1	2.93018	2.3933	2.82707	1.2265	0.639843	0.226282	0.0760447	0.0862913	0.278529	-1.96159	-4.20849	0.00375718	0.000131379	0.0459211	0.00937708	paired box 1
XM_005688110.1	OVOL2	3.86473	1.35477	4.31406	-	-	-	7.70755	7.88229	8.50399	-	1.33758	-	0.00698946	-	0.046735	ovo-like 2 %28Drosophila%29
XM_005688097.1	LOC102175311	28.9518	9.14385	27.6133	-	-	-	522.374	471.391	665.826	-	4.65859	-	0.000817928	-	0.0177786	calmodulin-like
XM_005688094.1	ENTPD6	63.2144	51.7822	55.608	15.0464	13.0587	11.6979	8.18186	13.0901	10.6372	-2.09971	-2.41862	0.000238172	0.000222857	0.019519	0.0111893	ectonucleoside triphosphate diphosphohydrolase 6 %28putative%29
XM_005688087.1	CD93	110.4	95.5745	104.602	-	-	-	40.4695	49.9014	23.4168	-	-1.4486	-	0.00178284	-	0.0243826	CD93 molecule
XM_005688063.1	DSTN	67.7625	77.5965	66.1435	135.981	184.084	178.552	161.026	243.695	209.011	1.23726	1.53693	0.00358829	0.00521498	0.0450411	0.0400304	destrin %28actin depolymerizing factor%29
XM_005688054.1	VIM	2698.18	2605.94	3428.66	1053.78	1019.45	846.08	1203.51	1010.91	1401.38	-1.58081	-1.27213	0.00194231	0.00384856	0.0370795	0.0343388	vimentin
XM_005688050.1	FAM171A1	34.5681	34.2833	33.0728	16.7415	12.396	10.8624	9.59373	7.95943	7.74052	-1.34943	-2.01065	0.00034412	4.27e-06	0.021239	0.00357058	family with sequence similarity 171%2C member A1
XM_005688030.1	SEC61A2	21.5136	27.3033	21.2021	6.76377	7.45153	5.72763	3.74123	7.29092	4.61732	-1.81187	-2.16163	0.00122897	0.00129623	0.0309825	0.0214856	Sec61 alpha 2 subunit %28S. cerevisiae%29
XM_005688014.1	BAMBI	2.38628	4.78962	3.718	79.8303	129.021	141.072	79.2338	64.5474	101.242	5.00545	4.49133	0.00381436	0.00186888	0.0462279	0.0248693	BMP and activin membrane-bound inhibitor
XM_005687978.1	CUBN	2.1967	2.68705	3.58987	0.47433	0.189617	0.297739	0.0567901	0.230151	0.17829	-3.13934	-4.18696	0.00384951	0.00290416	0.0463218	0.0303666	cubilin %28intrinsic factor-cobalamin receptor%29
XM_005687957.1	LOC102175591	3.14643	5.10356	3.62177	13.6794	11.2984	9.75221	12.0852	12.9001	17.8934	1.54865	1.85273	0.00405732	0.00563669	0.0475881	0.0416675	serine%2Fthreonine-protein kinase GIN4-like
XM_005687941.1	PRTFDC1	10.4963	17.8817	12.9469	-	-	-	1.87744	1.62585	2.28011	-	-2.83702	-	0.00556484	-	0.0414642	phosphoribosyl transferase domain containing 1
XM_005687922.1	SKIDA1	4.01071	4.31363	3.6391	1.02163	1.21279	0.88462	0.770243	1.42605	1.24725	-1.93946	-1.79666	0.000170028	0.00050544	0.0174374	0.0143262	SKI%2FDACH domain containing 1
XM_005687852.1	PROSER2	2.1248	1.55886	2.53926	6.17012	7.85428	7.85686	7.4011	8.08059	8.00053	1.81403	1.9159	0.00115577	8.57e-05	0.0304472	0.00832892	proline and serine-rich protein 2
XM_005687834.1	JAG1	20.6931	27.1884	23.9404	56.3846	74.8163	76.092	58.8645	60.416	47.1194	1.52918	1.21216	0.00243879	0.00236757	0.0396901	0.0276686	jagged 1
XM_005687825.1	LOC102186409	36.4086	33.857	44.0583	-	-	-	17.7767	0.6724	1.08518	-	-2.54905	-	0.00789279	-	0.0496479	60S ribosomal protein L17-like
XM_005687818.1	ISM1	35.4997	36.9952	45.8444	15.3164	19.0635	20.6624	12.6839	14.5929	20.4219	-1.10432	-1.31091	0.00421259	0.00408559	0.0482383	0.0354568	isthmin 1%2C angiogenesis inhibitor
XM_005687817.1	SPTLC3	2.99997	1.91232	2.38414	7.23035	8.2059	7.26786	-	-	-	1.63769	-	0.000331359	-	0.0211388	-	serine palmitoyltransferase%2C long chain base subunit 3
XM_005687771.1	GGACT	8.97426	7.95275	8.71851	33.4665	28.5788	42.917	-	-	-	2.03309	-	0.00331031	-	0.0438233	-	gamma-glutamylamine cyclotransferase
XM_005687767.1	CLYBL	1.42711	1.63365	1.80737	-	-	-	3.48819	3.88753	2.87465	-	1.07423	-	0.00466292	-	0.0377401	citrate lyase beta like
XM_005687746.1	RAB20	1.85901	1.28413	1.68336	8.34939	10.0132	13.3857	-	-	-	2.71763	-	0.00384043	-	0.0463101	-	RAB20%2C member RAS oncogene family
XM_005687733.1	KDELC1	37.9184	37.7661	35.213	11.1484	15.344	11.8713	10.706	11.6329	10.7651	-1.53141	-1.74415	0.00010226	9.73e-06	0.0156871	0.00369288	KDEL %28Lys-Asp-Glu-Leu%29 containing 1
XM_005687713.1	SLC15A1	0.344821	0.793963	0.0600462	4.57266	6.46963	7.09388	-	-	-	3.91917	-	0.00200527	-	0.0375142	-	solute carrier family 15 %28oligopeptide transporter%29%2C member 1
XM_005687693.1	KCTD12	69.8481	77.2992	75.7198	43.4225	22.6087	18.3649	14.5477	27.0129	11.6256	-1.40094	-2.06706	0.00461915	0.000416082	0.0496361	0.0132213	potassium channel tetramerization domain containing 12
XM_005687690.1	SPRY2	39.2854	53.2789	43.2277	21.2034	11.4221	11.9309	5.03815	15.1501	13.6554	-1.60769	-2.00444	0.00438517	0.00288052	0.0489089	0.0303064	sprouty homolog 2 %28Drosophila%29
XM_005687649.1	DACH1	1.86465	2.80676	1.41825	6.16153	7.34987	6.34854	5.22743	5.2779	4.44742	1.70543	1.29598	0.00113457	0.00380356	0.0304079	0.0343364	dachshund homolog 1 %28Drosophila%29
XM_005687636.1	SACS	9.85751	11.7467	11.2801	2.80598	1.989	1.2952	0.840812	2.44309	1.03588	-2.43284	-2.92837	0.000238251	0.00023351	0.019519	0.0112217	spastic ataxia of Charlevoix-Saguenay %28sacsin%29
XM_005687630.1	SHISA2	14.8804	32.2052	8.25407	-	-	-	69.2423	60.919	72.7227	-	1.87427	-	0.00347425	-	0.0330836	shisa family member 2
XM_005687626.1	RASL11A	2.0718	2.65742	2.3529	-	-	-	8.30364	8.53916	8.74396	-	1.85314	-	8.25e-06	-	0.00369288	RAS-like%2C family 11%2C member A
XM_005687618.1	B3GALTL	25.8147	28.8346	23.0563	10.1239	10.4091	6.60377	3.76148	9.00617	8.5143	-1.51777	-1.86839	0.0012357	0.00134845	0.0309825	0.0217072	beta 1%2C3-galactosyltransferase-like
XM_005687610.1	FOXO1	7.5534	7.846	4.91187	26.0753	28.0579	24.5935	24.922	29.4559	25.3539	1.95457	1.97288	0.000142445	0.000324586	0.0166985	0.0123657	forkhead box O1
XM_005687596.1	PHF11	4.77274	5.95727	4.55132	2.04276	2.53576	1.76263	-	-	-	-1.26895	-	0.00373578	-	0.0458235	-	PHD finger protein 11
XM_005687571.1	GJB2	8.00382	3.68144	4.98402	-	-	-	259.265	180.605	205.28	-	5.27437	-	0.000841756	-	0.0179389	gap junction protein%2C beta 2%2C 26kDa
XM_005687543.1	SLC46A3	0.194284	0.319533	0.289989	-	-	-	1.78563	1.23993	1.05424	-	2.34358	-	0.00802703	-	0.0499575	solute carrier family 46%2C member 3%2C transcript variant X1
XM_005687536.1	ALOX5AP	9.83868	9.65366	8.85843	5.08635	2.50919	2.02322	-	-	-	-1.55946	-	0.00331488	-	0.0438233	-	arachidonate 5-lipoxygenase-activating protein
XM_005687510.1	DCLK1	3.25802	4.15578	3.42616	0.880555	1.06356	0.342546	0.325035	0.599352	0.267864	-2.24505	-3.1846	0.00124049	0.000396314	0.0309825	0.0130618	doublecortin-like kinase 1%2C transcript variant X1
XM_005687488.1	FREM2	1.29719	1.96906	1.10624	3.21646	3.84448	3.53724	-	-	-	1.27729	-	0.00285878	-	0.041569	-	FRAS1 related extracellular matrix protein 2
XM_005687443.1	HTR2A	0.591267	0.696177	0.67861	-	-	-	0.103228	0.351413	0.264665	-	-1.45063	-	0.00643115	-	0.0446535	5-hydroxytryptamine %28serotonin%29 receptor 2A%2C G protein-coupled
XM_005687411.1	KBTBD7	4.12849	5.48101	5.26535	2.42022	1.6182	1.42147	0.744471	1.73181	0.886202	-1.44593	-2.14528	0.00377223	0.00180498	0.0459491	0.024484	kelch repeat and BTB %28POZ%29 domain containing 7
XM_005687407.1	LECT1	8.15872	9.43983	9.88832	2.40077	2.22656	1.55413	0.250697	1.20903	0.918227	-2.15272	-3.53095	0.000253646	0.000144129	0.0197715	0.00956479	leukocyte cell derived chemotaxin 1
XM_005687402.1	LOC102168917	5.4486	7.67765	7.0172	1.8459	2.75136	1.77306	2.11457	2.96845	2.50716	-1.66087	-1.4081	0.00330017	0.00405198	0.0438233	0.0353382	protein diaphanous homolog 3-like
XM_005687387.1	ARRDC1	0.497264	0.397559	0.625388	2.29968	3.02561	3.15742	2.59967	2.40813	3.14802	2.48025	2.42356	0.00107529	0.00066816	0.0297408	0.0163261	arrestin domain containing 1%2C transcript variant X1
XM_005687385.1	COL5A1	794.888	721.04	764.712	206.544	155.351	103.029	135.099	112.324	100.048	-2.29437	-2.71447	7.98e-05	1.1e-05	0.0147234	0.00369288	collagen%2C type V%2C alpha 1
XM_005687371.1	C8G	9.5789	7.0738	10.4253	-	-	-	1.69436	2.74667	3.4576	-	-1.77744	-	0.00479578	-	0.0383203	complement component 8%2C gamma polypeptide
XM_005687353.1	SARDH	4.49629	3.41501	3.47987	10.9342	14.6257	12.0278	14.1784	9.13317	11.4015	1.72235	1.60756	0.00161031	0.00659946	0.033494	0.0452261	sarcosine dehydrogenase
XM_005687350.1	ADAMTSL2	5.27268	5.55644	4.15706	-	-	-	11.0828	10.7214	12.8204	-	1.20816	-	0.00108145	-	0.0197486	ADAMTS-like 2
XM_005687344.1	FAM69B	6.94303	4.9958	8.31214	-	-	-	0.97226	0.945658	0.71222	-	-2.94478	-	0.00369367	-	0.033772	family with sequence similarity 69%2C member B
XM_005687343.1	AGPAT2	36.8019	18.5475	36.5045	-	-	-	112.874	133.836	134.022	-	2.05136	-	0.00048233	-	0.0139735	1-acylglycerol-3-phosphate O-acyltransferase 2
XM_005687333.1	SURF1	2.73853	2.76707	2.08001	-	-	-	5.14735	5.14256	6.35271	-	1.13355	-	0.0028088	-	0.029821	surfeit 1%2C transcript variant X2
XM_005687318.1	RALGDS	33.1704	33.11	36.894	-	-	-	11.9561	18.5542	15.6818	-	-1.15937	-	0.00114108	-	0.0201966	ral guanine nucleotide dissociation stimulator
XM_005687312.1	PRRC2B	88.0605	79.4588	85.5497	-	-	-	43.3603	43.149	29.1833	-	-1.12924	-	0.0010164	-	0.0193349	proline-rich coiled-coil 2B
XM_005687309.1	LAMC3	10.2504	4.83049	12.7745	34.0105	34.3777	31.8668	55.8508	46.5442	65.9076	1.84764	2.59503	0.0006156	0.00151391	0.0248394	0.0228294	laminin%2C gamma 3
XM_005687307.1	ABL1	87.6929	66.0342	76.746	35.9113	37.403	38.5682	42.3196	36.3808	33.9409	-1.04261	-1.03286	0.00329236	0.00429462	0.0438233	0.0363315	c-abl oncogene 1%2C non-receptor tyrosine kinase
XM_005687304.1	HMCN2	0.174609	1.09352	0.259014	-	-	-	2.9683	5.0665	3.60277	-	2.92988	-	0.00801164	-	0.0499575	hemicentin 2
XM_005687261.1	CRAT	12.0298	12.6918	9.70304	-	-	-	169.042	132.473	142.952	-	3.69056	-	0.000233591	-	0.0112217	carnitine O-acetyltransferase
XM_005687257.1	SH3GLB2	17.1885	17.3031	17.556	35.835	46.2913	46.2008	38.7233	45.7419	49.1761	1.30192	1.36046	0.0018503	0.000905445	0.0359822	0.0184899	SH3-domain GRB2-like endophilin B2
XM_005687250.1	SLC27A4	13.5065	12.2233	14.7908	-	-	-	46.9973	37.6647	48.3355	-	1.71467	-	0.000855227	-	0.01809	solute carrier family 27 %28fatty acid transporter%29%2C member 4
XM_005687248.1	DNM1	58.7942	46.9293	57.3646	29.8999	23.1148	18.7581	-	-	-	-1.18414	-	0.00354517	-	0.0449304	-	dynamin 1
XM_005687246.1	LCN2	52.1816	34.4801	49.4456	-	-	-	89.0414	128.025	112.87	-	1.27744	-	0.00686755	-	0.0463733	lipocalin 2
XM_005687234.1	LHX2	0.116106	0.125315	0.252729	28.0401	41.6921	41.6347	27.036	27.453	36.5882	7.81616	7.526	0.00124044	0.000635709	0.0309825	0.0159151	LIM homeobox 2
XM_005687223.1	ANGPTL2	180.792	158.064	187.463	-	-	-	58.875	92.6415	66.2884	-	-1.2729	-	0.00162612	-	0.0234533	angiopoietin-like 2
XM_005687173.1	PIP5KL1	0.877716	1.03345	1.32001	0.154471	0.214893	0.0759972	0.0766193	0.26083	0.0561267	-2.85901	-3.03734	0.00238126	0.00284916	0.0395322	0.0301106	phosphatidylinositol-4-phosphate 5-kinase-like 1
XM_005687163.1	SH2D3C	2.38185	2.08264	2.78262	-	-	-	0.28951	0.722745	0.318117	-	-2.44558	-	0.00132012	-	0.0216177	SH2 domain containing 3C%2C transcript variant X1
XM_005687159.1	STXBP1	23.1849	19.9102	26.6377	11.2941	11.7189	10.033	-	-	-	-1.07736	-	0.00367037	-	0.0454772	-	syntaxin binding protein 1
XM_005687151.1	ZBTB34	5.62047	7.78502	7.54439	-	-	-	2.15878	3.31726	1.44961	-	-1.59692	-	0.00591243	-	0.0425119	zinc finger and BTB domain containing 34
XM_005687146.1	MVB12B	10.4951	9.46035	12.5521	-	-	-	2.99011	3.77001	2.2715	-	-1.84772	-	0.00147502	-	0.0226642	multivesicular body subunit 12B
XM_005687127.1	OLFML2A	139.18	166.809	107.811	-	-	-	37.7235	40.6879	24.1059	-	-2.01306	-	0.00430671	-	0.0363315	olfactomedin-like 2A
XM_005687097.1	SOX11	8.63934	15.9394	10.0295	-	-	-	0.212712	0.482749	0.779102	-	-4.55276	-	0.00791785	-	0.0496595	SRY %28sex determining region Y%29-box 11
XM_005687088.1	MYCN	5.35647	7.48359	8.39484	22.4675	25.726	34.0113	23.317	20.0874	21.5392	1.95279	1.61275	0.00461806	0.000357846	0.0496361	0.0125649	v-myc avian myelocytomatosis viral oncogene neuroblastoma derived homolog
XM_005687084.1	SDC1	60.0353	39.049	56.2184	-	-	-	220.11	191.476	182.3	-	1.9351	-	0.00036569	-	0.0126962	syndecan 1
XM_005687076.1	DNAJC27	2.71412	3.36568	2.5475	0.931611	1.01953	0.531673	0.388156	1.42625	0.866559	-1.79693	-1.68616	0.00215595	0.00708585	0.0379278	0.0470037	DnaJ %28Hsp40%29 homolog%2C subfamily C%2C member 27
XM_005687074.1	GAREML	2.59319	2.45129	3.80736	-	-	-	0.390599	0.997267	0.429194	-	-2.28437	-	0.00771402	-	0.0488704	GRB2 associated%2C regulator of MAPK1-like
XM_005687072.1	OTOF	0.114576	0.153107	0.142514	0.41193	0.396734	0.498864	-	-	-	1.67245	-	0.000903057	-	0.0285374	-	otoferlin
XM_005687069.1	EMILIN1	290.212	223.801	321.778	53.4775	52.7942	37.1386	23.9679	34.9256	32.3743	-2.54299	-3.19496	0.00141565	0.0010322	0.031766	0.0194846	elastin microfibril interfacer 1
XM_005687064.1	KRTCAP3	5.5113	4.07279	5.96584	-	-	-	18.1649	30.513	24.8318	-	2.24103	-	0.00590031	-	0.0424679	keratinocyte associated protein 3
XM_005687056.1	MXD1	2.70495	4.26221	3.29424	8.78278	8.92929	10.7291	11.3759	11.3977	13.4754	1.47075	1.82071	0.00143058	0.0004787	0.0319606	0.0139735	MAX dimerization protein 1
XM_005687053.1	ANTXR1	128.734	170.409	115.765	-	-	-	29.7029	44.7639	15.2344	-	-2.20959	-	0.00428239	-	0.0362979	anthrax toxin receptor 1
XM_005687052.1	LOC102174485	24.9461	22.4955	23.2246	12.9618	11.585	8.84556	9.85124	13.4732	11.9641	-1.0815	-1.00182	0.000918058	0.000764698	0.0285935	0.0174982	uncharacterized LOC102174485
XM_005687044.1	PTGS1	1.79578	1.67978	2.25153	-	-	-	13.6915	14.2058	11.8233	-	2.79401	-	0.000108718	-	0.00880351	prostaglandin-endoperoxide synthase 1 %28prostaglandin G%2FH synthase and cyclooxygenase%29
XM_005687031.1	ID2	17.8948	24.4919	25.8574	57.4183	75.7421	69.9878	50.0871	57.4169	57.7947	1.57376	1.2763	0.00163489	0.000771985	0.0336149	0.0175036	inhibitor of DNA binding 2%2C dominant negative helix-loop-helix protein
XM_005687029.1	KIDINS220	0.673418	0.784975	0.797416	0.312882	0.362723	0.423316	-	-	-	-1.03756	-	0.0016072	-	0.033494	-	kinase D-interacting substrate%2C 220kDa%2C transcript variant X2
XM_005687013.1	RRM2	59.8243	67.1577	61.0789	13.9609	33.7302	19.5111	16.7602	27.3664	22.5869	-1.48462	-1.49515	0.003084	0.000446606	0.0429915	0.0136702	ribonucleotide reductase M2
XM_005686989.1	FAM49A	2.0403	4.29007	2.8226	-	-	-	8.05435	8.91732	11.4654	-	1.63546	-	0.00617887	-	0.0435873	family with sequence similarity 49%2C member A%2C transcript variant X2
XM_005686988.1	FAM49A	0.36598	0.746124	0.796633	4.66431	4.81867	5.46097	-	-	-	2.96887	-	9.96e-05	-	0.0156871	-	family with sequence similarity 49%2C member A%2C transcript variant X1
XM_005686941.1	DNMT3A	36.0787	45.8767	43.1862	19.1858	18.2221	18.8177	9.71498	12.6187	10.4287	-1.15426	-1.93345	0.0014407	0.000541869	0.0321187	0.0148537	DNA %28cytosine-5-%29-methyltransferase 3 alpha
XM_005686934.1	HADHB	26.949	32.9405	30.0223	61.1628	81.8563	81.3458	84.3021	100.403	79.2979	1.31927	1.55397	0.00310601	0.000921794	0.0429915	0.018625	hydroxyacyl-CoA dehydrogenase%2F3-ketoacyl-CoA thiolase%2Fenoyl-CoA hydratase %28trifunctional protein%29%2C beta subunit
XM_005686928.1	SLC35F6	11.2084	11.4	12.0581	-	-	-	42.2146	32.3229	33.5124	-	1.64008	-	0.00144437	-	0.022494	solute carrier family 35%2C member F6
XM_005686926.1	MAPRE3	1.36984	1.56063	1.78905	-	-	-	5.15185	3.48275	4.85794	-	1.51545	-	0.00521358	-	0.0400304	microtubule-associated protein%2C RP%2FEB family%2C member 3%2C transcript variant X2
XM_005686895.1	EIF2B4	0.221651	0.318974	0.096494	0.965464	1.24362	1.31943	-	-	-	2.46943	-	0.00154125	-	0.0333475	-	eukaryotic translation initiation factor 2B%2C subunit 4 delta%2C 67kDa%2C transcript variant X2
XM_005686894.1	EIF2B4	1.0086	1.41115	1.1709	2.76613	3.31994	3.2021	3.82017	3.5412	4.0991	1.37115	1.67435	0.000755544	0.000191384	0.0266848	0.0105949	eukaryotic translation initiation factor 2B%2C subunit 4 delta%2C 67kDa%2C transcript variant X1
XM_005686883.1	FNDC4	18.379	14.9985	15.9373	-	-	-	7.96317	9.11757	7.51502	-	-1.00361	-	0.00178725	-	0.0243826	fibronectin type III domain containing 4
XM_005686862.1	FOSL2	0.351647	0.600935	0.650621	1.70189	1.34164	1.75834	-	-	-	1.58264	-	0.00263246	-	0.0406636	-	FOS-like antigen 2%2C transcript variant X1
XM_005686861.1	PLB1	0.11718	0.0843157	0.136036	5.5578	7.17073	8.74249	8.72029	4.57525	7.63808	5.99123	5.95466	0.00156011	0.00522274	0.033494	0.0400349	phospholipase B1
XM_005686850.1	LBH	51.8789	52.4304	79.8692	-	-	-	224.398	194.252	165.099	-	1.66424	-	0.00238149	-	0.0277326	limb bud and heart development
XM_005686846.1	EHD3	15.4915	12.4094	14.2283	-	-	-	7.92479	6.69218	5.24592	-	-1.08474	-	0.0032944	-	0.0322388	EH-domain containing 3
XM_005686808.1	MEIS1	13.289	17.0613	14.9064	5.65357	3.80021	4.82292	2.90715	5.63436	5.29574	-1.66447	-1.70958	0.00105755	0.00165887	0.0297408	0.0237446	Meis homeobox 1
XM_005686763.1	TCF7L1	52.6151	52.287	50.9966	-	-	-	19.4603	25.4906	27.667	-	-1.10221	-	0.000376418	-	0.0128588	transcription factor 7-like 1 %28T-cell specific%2C HMG-box%29
XM_005686762.1	CAPG	39.3988	15.8364	32.6479	-	-	-	141.218	118.131	125.571	-	2.1309	-	0.00053276	-	0.0146893	capping protein %28actin filament%29%2C gelsolin-like
XM_005686752.1	FOXI3	0.480611	0.230546	0.697434	-	-	-	2.61516	3.45631	2.88483	-	2.66865	-	0.000876112	-	0.0183043	forkhead box I3
XM_005686743.1	C11H2orf40	8.24937	18.1635	13.647	94.0633	71.2418	92.2412	-	-	-	2.68461	-	0.00076911	-	0.0268332	-	chromosome 11 open reading frame%2C human C2orf40
XM_005686742.1	ST6GAL2	9.52012	9.63868	6.30847	-	-	-	0.485391	0.826194	0.118523	-	-4.15445	-	0.00195214	-	0.0254049	ST6 beta-galactosamide alpha-2%2C6-sialyltranferase 2
XM_005686722.1	GGCX	18.5699	22.9398	14.9421	-	-	-	4.44095	7.92993	6.4568	-	-1.58416	-	0.00765259	-	0.0486334	gamma-glutamyl carboxylase%2C transcript variant X2
XM_005686663.1	SLC20A1	35.1612	32.4471	32.8693	14.1269	21.0614	13.7264	16.2671	19.2558	14.4024	-1.03853	-1.00903	0.00243729	0.000513045	0.0396901	0.0144247	solute carrier family 20 %28phosphate transporter%29%2C member 1
XM_005686596.1	EPCAM	5.9079	3.085	7.17209	19.9986	24.4875	24.6619	-	-	-	2.09682	-	0.000817912	-	0.0276021	-	epithelial cell adhesion molecule
XM_005686587.1	PKDCC	125.523	108.144	154.089	52.209	33.6936	37.878	29.5958	39.3615	37.2991	-1.64737	-1.8676	0.00374284	0.00239092	0.0458235	0.0277355	protein kinase domain containing%2C cytoplasmic
XM_005686586.1	NRXN1	4.11377	4.44005	3.13911	1.52119	0.497932	0.374201	0.199728	0.780651	0.487696	-2.28855	-2.99364	0.00437159	0.00131465	0.048871	0.021564	neurexin 1
XM_005686573.1	TTC7A	12.6739	7.09965	10.5165	-	-	-	34.7535	24.306	27.1486	-	1.50898	-	0.00607924	-	0.0432991	tetratricopeptide repeat domain 7A
XM_005686541.1	EML4	14.3265	23.5121	16.9005	-	-	-	2.19849	5.74154	3.6828	-	-2.23561	-	0.00793966	-	0.0497	echinoderm microtubule associated protein like 4
XM_005686525.1	CDKL4	1.8094	1.69818	1.09594	0.152297	0.141246	0.299711	0.151082	0.514319	0.110674	-2.95602	-2.56847	0.00418654	0.0075883	0.0482239	0.0485151	cyclin-dependent kinase-like 4
XM_005686462.1	LOC102187233	2.28644	2.69213	5.86372	13.6814	17.0177	14.8875	21.9951	34.9695	23.7444	2.07194	2.89606	0.0014898	0.00525936	0.0326759	0.040246	uncharacterized LOC102187233
XM_005686461.1	SFXN5	3.95378	2.98119	4.06091	10.45	12.4547	11.5678	-	-	-	1.64848	-	0.000314544	-	0.0207916	-	sideroflexin 5
XM_005686443.1	GPR45	1.32604	1.06016	1.28285	0.285232	0.132267	0.14033	-	-	-	-2.71751	-	0.000420007	-	0.022363	-	G protein-coupled receptor 45
XM_005686441.1	SLC9A2	0.0605561	0.246912	0.0175751	3.02847	2.75435	2.55696	-	-	-	4.68131	-	6.44e-05	-	0.0142801	-	solute carrier family 9%2C subfamily A %28NHE2%2C cation proton antiporter 2%29%2C member 2
XM_005686438.1	CREG2	3.07798	2.28395	3.34994	-	-	-	5.63408	7.33651	6.42759	-	1.15487	-	0.00371646	-	0.0339585	cellular repressor of E1A-stimulated genes 2
XM_005686437.1	RNF149	6.92947	6.99342	5.95503	-	-	-	26.3132	25.1029	28.201	-	2.00191	-	3.22e-05	-	0.00585538	ring finger protein 149
XM_005686431.1	KIAA1211L	1.0726	1.36716	0.933901	3.20368	3.52144	3.61934	4.23751	4.67492	4.44065	1.61647	1.98478	0.000203411	5.01e-05	0.01843	0.00679205	KIAA1211-like ortholog
XM_005686419.1	ARID5A	9.31375	6.77956	8.01505	3.51176	3.74305	2.63028	-	-	-	-1.28621	-	0.00418141	-	0.0482239	-	AT rich interactive domain 5A %28MRF1-like%29
XM_005686411.1	LOC102171434	5.65634	6.43101	8.95187	1.5427	0.841622	0.833395	0.180047	0.170256	0.593511	-2.70897	-4.47844	0.00436395	0.00262867	0.0488614	0.0287672	two pore calcium channel protein 1-like
XM_005686385.1	TGFA	0.87487	0.511473	0.952171	7.35686	10.0137	10.8844	11.0785	11.201	10.8078	3.59484	3.82262	0.00127671	5.54e-07	0.0309825	0.00112137	transforming growth factor%2C alpha
XM_005686382.1	ATP6V1B1	0.122662	0.286848	0.347101	46.2162	56.6822	52.894	45.4354	59.7106	84.8367	7.68586	7.9721	7.21e-05	0.00541071	0.0145856	0.0407875	ATPase%2C H%2B transporting%2C lysosomal 56%2F58kDa%2C V1 subunit B1
XM_005686352.1	ACTG2	11.8434	9.29189	15.0951	66.4352	74.7444	73.7964	-	-	-	2.5689	-	4.41e-05	-	0.0127287	-	actin%2C gamma 2%2C smooth muscle%2C enteric%2C transcript variant X1
XM_005686306.1	FHL2	1.48489	1.31127	1.35164	2.80927	2.96897	3.3428	-	-	-	1.13686	-	0.000572539	-	0.0243248	-	four and a half LIM domains 2%2C transcript variant X1
XM_005686298.1	IL1RL2	0.669716	0.0240945	0.874668	6.06117	8.74768	9.91876	8.97102	9.45009	8.57374	3.97868	4.10525	0.00273611	1.94e-05	0.0409262	0.00452622	interleukin 1 receptor-like 2
XM_005686295.1	IL1R1	0.589843	0.587654	0.572825	0.241552	0.122195	0.0648217	-	-	-	-2.03002	-	0.00108931	-	0.029956	-	interleukin 1 receptor%2C type I%2C transcript variant X2
XM_005686261.1	LOC102179012	0.520524	2.14022	1.1654	6.406	6.07467	6.16166	12.1386	14.5844	13.9657	2.28462	3.41066	0.000507834	0.000147331	0.0233798	0.00956479	protein FAM178B-like
XM_005686245.1	PROM2	0.604563	0.133849	0.789577	-	-	-	55.7078	55.9933	46.3529	-	6.69264	-	8.01e-05	-	0.00822712	prominin 2
XM_005686241.1	ZNF514	1.25816	0.905297	1.27803	-	-	-	0.362437	0.228485	0.0884999	-	-2.34065	-	0.00312065	-	0.0314625	zinc finger protein 514
XM_005686240.1	MALL	7.9038	3.80263	10.1394	-	-	-	96.2833	81.637	63.1295	-	3.4639	-	0.0017091	-	0.0240201	mal%2C T-cell differentiation protein-like
XM_005686239.1	BUB1	12.4659	14.8669	17.2969	-	-	-	5.19557	7.34066	7.05223	-	-1.188	-	0.00572361	-	0.0418657	BUB1 mitotic checkpoint serine%2Fthreonine kinase
XM_005686225.1	LOC102168547	102.053	95.9078	101.348	188.8	220.04	200.504	219.438	333.709	320.278	1.02562	1.54505	0.000375728	0.0060902	0.0216375	0.0432991	beta-2-microglobulin-like
XM_005686180.1	ANGEL1	15.5287	11.4896	11.6084	-	-	-	4.71402	4.89876	4.6164	-	-1.44075	-	0.00361778	-	0.0335444	angel homolog 1 %28Drosophila%29
XM_005686148.1	VASH1	41.8917	44.6873	33.1587	14.6885	9.94084	9.26332	4.83835	6.38407	3.9152	-1.82083	-2.98367	0.00178215	0.000599896	0.0349875	0.0155141	vasohibin 1
XM_005686141.1	TGFB3	31.3108	35.7976	33.2426	-	-	-	8.67709	11.3723	9.17093	-	-1.78001	-	0.000104112	-	0.00880351	transforming growth factor%2C beta 3
XM_005686136.1	LOC102188774	18.8827	20.269	21.5619	9.28861	12.2272	7.9604	6.53934	12.1426	7.62098	-1.04247	-1.20679	0.00214576	0.00366869	0.0379278	0.0337175	probable ergosterol biosynthetic protein 28-like
XM_005686135.1	LOC102188506	1.01707	0.411653	1.38367	-	-	-	3.41819	5.26406	4.06894	-	2.18076	-	0.00558645	-	0.0415597	feline leukemia virus subgroup C receptor-related protein 2-like
XM_005686126.1	LTBP2	12.159	10.6749	8.11899	-	-	-	21.2343	26.3449	20.1698	-	1.13012	-	0.00542778	-	0.0408728	latent transforming growth factor beta binding protein 2
XM_005686121.1	LOC102182233	0.314158	0.22605	0.205149	-	-	-	1.58374	1.45483	1.49163	-	2.60357	-	1.57e-05	-	0.00411054	acyl-coenzyme A thioesterase 4-like
XM_005686111.1	GALNT16	173.402	143.978	154.274	53.6514	42.7288	28.1677	23.1785	29.9684	30.9084	-1.92103	-2.48832	0.000521506	0.000134317	0.0236887	0.00937708	UDP-N-acetyl-alpha-D-galactosamine:polypeptide N-acetylgalactosaminyltransferase 16
XM_005686110.1	ACTN1	54.1444	45.1439	60.9246	97.0846	126.583	118.272	115.578	146.882	141.784	1.09375	1.33524	0.00361288	0.0016181	0.0450918	0.0234533	actinin%2C alpha 1
XM_005686102.1	PRKCH	10.4935	11.6555	11.0411	19.3416	25.0232	24.0992	22.2244	27.1838	23.9526	1.0446	1.14426	0.00279024	0.000852205	0.0411961	0.0180631	protein kinase C%2C eta
XM_005686056.1	PNMA1	2.87792	2.68762	3.14554	0.948322	1.20933	0.05832	0.529177	0.3336	0.516858	-1.97491	-2.65857	0.00437695	7.69e-05	0.0488929	0.00813975	paraneoplastic Ma antigen 1
XM_005686006.1	RDH12	1.00938	0.290515	2.32895	26.3309	38.2841	44.8478	59.0749	40.9689	46.2568	4.91479	5.33328	0.00294106	0.000922578	0.0419611	0.018625	retinol dehydrogenase 12 %28all-trans%2F9-cis%2F11-cis%29
XM_005685997.1	TMEM229B	0.545121	2.87641	2.21493	-	-	-	69.0945	47.716	48.0582	-	4.87038	-	0.00171517	-	0.0240201	transmembrane protein 229B
XM_005685996.1	PLEK2	3.505	5.07976	4.17722	-	-	-	11.4574	10.5364	12.1524	-	1.41987	-	0.000401313	-	0.0131046	pleckstrin 2
XM_005685994.1	ATP6V1D	12.601	20.4007	18.743	-	-	-	32.7076	40.5474	39.5634	-	1.12452	-	0.00400408	-	0.035126	ATPase%2C H%2B transporting%2C lysosomal 34kDa%2C V1 subunit D
XM_005685983.1	RAB15	5.69949	7.22136	5.07034	-	-	-	21.1775	18.2258	18.8252	-	1.69444	-	0.00026353	-	0.0115986	RAB15%2C member RAS oncogene family
XM_005685972.1	HSPA2	3.20335	4.10651	7.30939	37.3152	42.2761	57.4077	-	-	-	3.22822	-	0.00271279	-	0.0409149	-	heat shock 70kDa protein 2
XM_005685932.1	DACT1	55.2776	51.9346	34.8411	-	-	-	9.11464	12.6547	11.9659	-	-2.0741	-	0.00491845	-	0.0387399	dishevelled-binding antagonist of beta-catenin 1
XM_005685908.1	C10H14orf37	48.877	50.6538	65.8769	13.6213	17.0689	16.1995	9.42106	12.0951	9.74746	-1.81868	-2.40347	0.0019808	0.00121121	0.0373115	0.0209078	chromosome 10 open reading frame%2C human C14orf37
XM_005685898.1	PELI2	9.8834	9.98349	11.1428	6.19381	3.01437	4.40495	-	-	-	-1.18772	-	0.00447943	-	0.0492329	-	pellino E3 ubiquitin protein ligase family member 2
XM_005685885.1	LGALS3	117.2	75.3953	100.972	352.85	461.94	530.174	502.585	491.805	573.035	2.1958	2.41663	0.00272178	0.000113818	0.0409149	0.00892294	lectin%2C galactoside-binding%2C soluble%2C 3
XM_005685871.1	BMP4	1.27495	1.12908	0.725821	4.41425	5.19446	5.97813	3.62566	4.06077	3.48377	2.31616	1.83549	0.000985347	0.00035988	0.0293486	0.0125931	bone morphogenetic protein 4%2C transcript variant X1
XM_005685862.1	TNFAIP8L3	8.43314	6.10985	9.52007	-	-	-	25.9687	23.8912	28.8415	-	1.70957	-	0.000484121	-	0.0139735	tumor necrosis factor%2C alpha-induced protein 8-like 3
XM_005685860.1	GNB5	12.031	9.26891	12.7237	-	-	-	2.42137	4.33664	2.37213	-	-1.89783	-	0.00257597	-	0.0285209	guanine nucleotide binding protein %28G protein%29%2C beta 5
XM_005685840.1	NID2	137.304	161.504	117.513	-	-	-	42.8552	61.255	53.9083	-	-1.3976	-	0.0033615	-	0.0326296	nidogen 2 %28osteonidogen%29
XM_005685839.1	PYGL	27.4984	24.3601	31.1588	-	-	-	50.5503	62.1451	56.3233	-	1.0257	-	0.00179116	-	0.0244079	phosphorylase%2C glycogen%2C liver
XM_005685819.1	GATM	8.63133	15.3998	6.51826	31.4155	36.1728	27.6823	35.901	47.5522	52.2571	1.64089	2.15131	0.00403983	0.00321561	0.0475213	0.0320025	glycine amidinotransferase %28L-arginine:glycine amidinotransferase%29
XM_005685810.1	SEMA6D	0.586622	0.625332	0.491846	0.168244	0.0780178	0.0206933	0.0417255	0.0946956	0.0611312	-2.67409	-3.10845	0.00120845	0.000295558	0.0308781	0.0118996	sema domain%2C transmembrane domain %28TM%29%2C and cytoplasmic domain%2C %28semaphorin%29 6D%2C transcript variant X1
XM_005685775.1	GLDN	0.438094	0.55771	0.469467	5.48009	4.99168	4.26886	-	-	-	3.33056	-	0.000234669	-	0.019519	-	gliomedin
XM_005685770.1	LYSMD2	14.774	21.4334	16.9659	4.17421	3.08272	2.43395	1.22694	4.69889	3.08956	-2.456	-2.56024	0.00201335	0.00260137	0.0375178	0.0286677	LysM%2C putative peptidoglycan-binding%2C domain containing 2
XM_005685715.1	AQP9	0.122781	0.0883463	0.213808	4.10021	5.18047	3.74213	-	-	-	4.93765	-	0.00063798	-	0.0250499	-	aquaporin 9
XM_005685714.1	LIPC	0.290768	0.10461	0.337557	1.40725	1.30514	1.0616	1.44256	1.26731	1.53397	2.36433	2.53361	0.00124928	0.000379107	0.0309825	0.0128588	lipase%2C hepatic
XM_005685708.1	CCNB2	33.8743	26.6341	31.1562	-	-	-	15.1399	12.6165	14.4265	-	-1.11971	-	0.00181591	-	0.0245798	cyclin B2
XM_005685695.1	LOC100861305	0.448003	2.01473	0.633864	5.90843	4.77589	6.18708	-	-	-	2.44582	-	0.00219375	-	0.0379952	-	retinoic acid-related orphan receptor alpha isoform 2
XM_005685623.1	TMEM62	4.11035	7.72254	4.8049	-	-	-	12.5716	13.5191	11.4847	-	1.17532	-	0.00509035	-	0.0394426	transmembrane protein 62
XM_005685622.1	CDAN1	15.6937	13.3199	15.0207	-	-	-	5.69785	8.71234	6.23668	-	-1.09271	-	0.00260518	-	0.0286874	codanin 1
XM_005685620.1	SPTBN5	1.21123	0.753759	0.577182	-	-	-	2.24755	2.28287	2.67111	-	1.50224	-	0.0026151	-	0.0287115	spectrin%2C beta%2C non-erythrocytic 5
XM_005685619.1	PLA2G4B	1.82663	3.3896	3.3901	-	-	-	36.2337	29.3312	37.9036	-	3.58765	-	0.000293193	-	0.0118986	phospholipase A2%2C group IVB %28cytosolic%29
XM_005685613.1	SPINT1	11.067	3.44963	9.16773	-	-	-	65.3962	48.2841	64.6723	-	2.91273	-	0.00103257	-	0.0194846	serine peptidase inhibitor%2C Kunitz type 1
XM_005685609.1	CHST14	61.3442	54.1109	60.4845	30.5853	28.4732	24.0078	15.0847	17.9633	15.7979	-1.08275	-1.84877	0.000493676	6.46e-05	0.0233242	0.00781083	carbohydrate %28N-acetylgalactosamine 4-0%29 sulfotransferase 14
XM_005685603.1	PAK6	4.07696	1.89261	4.92385	-	-	-	9.87549	8.31148	8.2888	-	1.28121	-	0.00763866	-	0.0486103	p21 protein %28Cdc42%2FRac%29-activated kinase 6
XM_005685602.1	GPR176	7.13556	6.78921	8.83146	-	-	-	3.90723	2.50601	3.02813	-	-1.26919	-	0.00412129	-	0.0356221	G protein-coupled receptor 176
XM_005685597.1	FMN1	0.346725	0.650826	0.393767	4.87369	7.32139	7.04976	6.80349	8.4594	6.60622	3.78995	3.97437	0.00158742	0.00032988	0.033494	0.0124319	formin 1
XM_005685460.1	SCG5	5.35263	4.52714	4.66046	0.454482	0.168602	0.178879	-	-	-	-4.18037	-	7.34e-05	-	0.0145856	-	secretogranin V %287B2 protein%29%2C transcript variant X2
XM_005685456.1	GREM1	4.22933	5.02208	5.97638	-	-	-	0.421648	0.931745	0.634005	-	-2.93775	-	0.00110606	-	0.0199042	gremlin 1%2C transcript variant X1
XM_005685402.1	LOC102176963	8.65793	6.42596	7.95383	22.9638	22.0319	22.4658	29.1304	22.5076	26.9018	1.55007	1.76943	3.15e-05	0.000841483	0.0116475	0.0179389	purine nucleoside phosphorylase-like
XM_005685401.1	LOC102176691	7.65856	5.94193	10.7851	-	-	-	19.632	20.3906	22.4385	-	1.35693	-	0.00152588	-	0.0228294	purine nucleoside phosphorylase-like
XM_005685395.1	RNASE6	11.3609	11.2126	13.2336	3.26934	3.10102	3.43626	7.66589	5.18584	5.02162	-1.86842	-1.00244	0.000191379	0.00511256	0.0183826	0.0395713	ribonuclease%2C RNase A family%2C k6
XM_005685390.1	LOC102173852	459.967	388.332	386.584	99.0222	36.1812	48.1406	84.592	61.4338	89.155	-2.75175	-2.39253	0.000344895	0.000202642	0.021239	0.0109196	brain ribonuclease-like
XM_005685374.1	ARHGEF40	68.4929	64.7726	77.9728	31.39	29.1123	24.9935	19.0417	29.1823	20.9626	-1.30495	-1.61031	0.000650317	0.000699682	0.025259	0.0168066	Rho guanine nucleotide exchange factor %28GEF%29 40
XM_005685357.1	SALL2	23.8202	20.155	25.0847	8.13928	6.92993	8.03507	4.12984	4.20567	2.85074	-1.57969	-2.62612	0.00055666	0.000234988	0.0240885	0.0112217	sal-like 2 %28Drosophila%29
XM_005685347.1	AJUBA	33.6866	22.6589	36.4088	-	-	-	57.426	64.8076	65.0394	-	1.01366	-	0.00298813	-	0.0307091	ajuba LIM protein
XM_005685344.1	SLC22A17	78.1227	70.5823	101.464	-	-	-	13.3721	21.5103	19.1606	-	-2.21072	-	0.0024347	-	0.0279326	solute carrier family 22%2C member 17
XM_005685330.1	TGM1	2.30608	1.20435	2.5908	29.9904	41.0368	49.2771	36.3229	33.4358	44.2943	4.30145	4.22446	0.00245137	0.000389668	0.0396901	0.0129633	transglutaminase 1
XM_005685328.1	LTB4R	0.452968	0.847417	0.55215	-	-	-	2.60973	2.96138	2.99505	-	2.20915	-	0.000196479	-	0.0107482	leukotriene B4 receptor
XM_005685327.1	NYNRIN	55.2557	45.415	47.4426	18.9047	17.1313	17.1408	11.4635	10.5708	7.04882	-1.47783	-2.34845	0.000491726	0.000270704	0.0233231	0.0117023	NYN domain and retroviral integrase containing
XM_005685314.1	ITGA11	41.8705	35.9608	53.4818	-	-	-	17.2584	14.148	10.3552	-	-1.65276	-	0.00566269	-	0.0416675	integrin%2C alpha 11
XM_005685308.1	IGDCC4	53.7881	59.378	44.3834	16.099	9.39596	6.66657	2.35554	4.29452	3.16347	-2.2924	-4.00489	0.00129619	0.00036641	0.0309825	0.0126962	immunoglobulin superfamily%2C DCC subclass%2C member 4
XM_005685300.1	JMY	2.80104	5.49922	2.28433	11.3358	10.8205	11.6974	10.7099	15.067	13.364	1.67735	1.88671	0.00165722	0.00412223	0.0337772	0.0356221	junction mediating and regulatory protein%2C p53 cofactor
XM_005685297.1	LHFPL2	81.411	102.592	90.1411	24.8838	19.4795	14.2465	7.2007	9.9312	7.814	-2.22572	-3.45806	0.000472529	0.000179624	0.0229264	0.0103278	lipoma HMGIC fusion partner-like 2
XM_005685293.1	F2RL1	4.77493	2.37431	5.64468	-	-	-	36.7176	36.2931	36.0995	-	3.09226	-	5.5e-06	-	0.00369288	coagulation factor II %28thrombin%29 receptor-like 1
XM_005685287.1	LOC102185571	19.0447	32.048	21.9653	-	-	-	1.20938	5.44779	1.98662	-	-3.07931	-	0.00662757	-	0.0453748	aminopeptidase Q-like
XM_005685276.1	SLC7A7	21.1235	18.3178	23.2381	10.3337	9.25617	10.1246	12.7921	7.10878	9.37076	-1.07683	-1.09849	0.0016804	0.00696186	0.0339616	0.0466494	solute carrier family 7 %28amino acid transporter light chain%2C y%2BL system%29%2C member 7
XM_005685262.1	PRMT5	0.731021	0.498316	0.669989	-	-	-	0.0738895	0.167692	0.270635	-	-1.89066	-	0.00677453	-	0.0459275	protein arginine methyltransferase 5%2C transcript variant X2
XM_005685233.1	DCAF11	0.378616	0.204323	0.164828	-	-	-	0.863455	1.08294	0.998709	-	1.97766	-	0.00132926	-	0.0216283	DDB1 and CUL4 associated factor 11%2C transcript variant X3
XM_005685207.1	CIDEB	0.723468	0.185916	0.269963	2.95119	2.4587	2.26405	3.77122	3.15322	3.08972	2.70198	3.08598	0.00120453	0.000425251	0.0308781	0.0133629	cell death-inducing DFFA-like effector b
XM_005685201.1	NFATC4	28.7159	23.0021	29.0301	10.6838	8.63403	9.46566	9.41121	9.18223	6.60415	-1.48818	-1.68014	0.00106978	0.00100956	0.0297408	0.0193185	nuclear factor of activated T-cells%2C cytoplasmic%2C calcineurin-dependent 4%2C transcript variant X1
XM_005685168.1	THSD4	3.74905	2.88834	3.14884	0.384884	0.339958	0.09017	0.10909	0.371367	0.10655	-3.58586	-4.0593	0.00038246	0.000340533	0.0216375	0.0124319	thrombospondin%2C type I%2C domain containing 4%2C transcript variant X2
XM_005685167.1	THSD4	4.68431	4.68058	5.4656	0.62414	0.663976	0.722512	0.400634	0.413289	0.18676	-2.88285	-3.88951	8.35e-05	7.02e-05	0.0147234	0.00800396	thrombospondin%2C type I%2C domain containing 4%2C transcript variant X1
XM_005685163.1	LARP6	33.4239	33.8885	35.3508	15.6693	11.1931	9.97935	-	-	-	-1.4785	-	0.000274443	-	0.0199778	-	La ribonucleoprotein domain family%2C member 6
XM_005685151.1	CORO2B	46.1001	32.8174	45.1718	14.436	14.6079	13.1034	9.40844	14.3924	11.4664	-1.55787	-1.81498	0.00316772	0.00280577	0.0433473	0.029821	coronin%2C actin binding protein%2C 2B
XM_005685149.1	CALML4	6.61139	7.0502	6.21198	2.16386	3.03162	1.58556	1.3245	2.74681	3.21186	-1.55127	-1.44821	0.000844131	0.00244303	0.0280922	0.0279398	calmodulin-like 4%2C transcript variant X1
XM_005685140.1	SMAD3	14.094	14.5035	14.0128	-	-	-	6.90178	8.54684	3.60503	-	-1.16113	-	0.005787	-	0.0420581	SMAD family member 3%2C transcript variant X1
XM_005685116.1	VWA9	0.772624	0.726993	0.931448	-	-	-	0.114138	0.323795	0.292638	-	-1.73449	-	0.00325211	-	0.0320953	von Willebrand factor A domain containing 9%2C transcript variant X5
XM_005685105.1	CILP	3.08412	2.85857	2.82184	1.06256	0.492728	0.547656	0.903501	0.882849	1.04793	-2.05927	-1.6287	0.000368189	3.43e-05	0.0216375	0.00593016	cartilage intermediate layer protein%2C nucleotide pyrophosphohydrolase%2C transcript variant X3
XM_005685097.1	PTGER2	0.113676	0.327177	0.362911	1.65049	2.61924	2.05711	-	-	-	2.97664	-	0.00321207	-	0.0435005	-	prostaglandin E receptor 2 %28subtype EP2%29%2C 53kDa
XM_005685090.1	THBS4	339.289	408.657	224.902	-	-	-	24.4462	48.277	65.0807	-	-2.8196	-	0.00710928	-	0.047033	thrombospondin 4
XM_005685060.1	F2RL2	5.79628	11.2396	15.2257	-	-	-	30.5646	33.8624	33.8381	-	1.60686	-	0.00171422	-	0.0240201	coagulation factor II %28thrombin%29 receptor-like 2
XM_005685046.1	SIMC1	16.1014	20.2918	15.8299	7.68594	5.00673	4.68169	3.54001	6.69502	4.07819	-1.58773	-1.86734	0.00255932	0.00191814	0.040394	0.0252169	SUMO-interacting motifs containing 1
XM_005685036.1	EPB41L4A	8.32743	10.0809	10.1757	-	-	-	2.98573	4.05008	3.4693	-	-1.44411	-	0.00087081	-	0.0182831	erythrocyte membrane protein band 4.1 like 4A
XM_005685034.1	LOC102186871	0.805362	0.993415	1.00174	-	-	-	0.110476	0.250725	0.485571	-	-1.72565	-	0.00681448	-	0.0461215	uncharacterized LOC102186871
XM_005685030.1	NREP	351.64	509.67	342.729	-	-	-	27.0347	47.0109	59.074	-	-3.17709	-	0.00291013	-	0.0303666	neuronal regeneration related protein
XM_005685008.1	THBS2	72.6353	80.8695	63.3654	-	-	-	30.0049	34.0699	26.3899	-	-1.26141	-	0.00158326	-	0.0232759	thrombospondin 2
XM_005685007.1	SMOC2	177.291	154.453	174.81	36.9521	27.8409	26.7951	23.0438	22.9306	23.6847	-2.46748	-2.86233	6.31e-05	3.6e-05	0.0142165	0.00612905	SPARC related modular calcium binding 2
XM_005684998.1	LOC102175856	0.254438	0.366158	0.249228	-	-	-	1.28268	1.42086	1.31994	-	2.20965	-	4.81e-05	-	0.00679205	uncharacterized LOC102175856
XM_005684997.1	UNC93A	0.351787	0.325447	0.350052	-	-	-	10.906	7.72104	12.5139	-	4.9219	-	0.00204871	-	0.0259698	unc-93 homolog A %28C. elegans%29
XM_005684993.1	RPS6KA2	18.3259	13.6437	17.7145	-	-	-	6.53607	7.25377	4.18286	-	-1.46698	-	0.00369135	-	0.033772	ribosomal protein S6 kinase%2C 90kDa%2C polypeptide 2
XM_005684986.1	IGF2R	231.914	262.543	159.321	-	-	-	35.8186	38.6287	23.4712	-	-2.73915	-	0.00391868	-	0.0347314	insulin-like growth factor 2 receptor
XM_005684983.1	FNDC1	194.681	222.622	121.554	-	-	-	14.8367	12.9581	12.5168	-	-3.74064	-	0.00528102	-	0.0403247	fibronectin type III domain containing 1
XM_005684982.1	TAGAP	0.358749	0.722779	0.562244	-	-	-	1.41238	1.25088	1.2365	-	1.24638	-	0.0032552	-	0.0321034	T-cell activation RhoGTPase activating protein
XM_005684970.1	LOC102188948	10.4827	10.0857	9.44002	-	-	-	3.33609	5.02573	4.95084	-	-1.17257	-	0.000902894	-	0.0184899	monofunctional C1-tetrahydrofolate synthase%2C mitochondrial-like
XM_005684944.1	EZR	70.4013	41.0954	58.9772	-	-	-	181.885	185.793	216.879	-	1.77779	-	0.0005896	-	0.0154166	ezrin
XM_005684943.1	SYTL3	0.123312	0.266185	0.214733	2.14849	2.21399	2.46639	2.92075	2.73206	2.68891	3.49848	3.78717	3.95e-05	6.25e-06	0.0126402	0.00369288	synaptotagmin-like 3
XM_005684923.1	FBXO5	3.48132	3.19782	3.3536	1.29055	0.531956	0.705477	0.426751	1.29134	0.729429	-1.98866	-2.03532	0.000507661	0.000686072	0.0233798	0.0165639	F-box protein 5%2C transcript variant X1
XM_005684917.1	AKAP12	122.145	170.625	106.98	-	-	-	8.19581	14.2918	12.4993	-	-3.51421	-	0.00323134	-	0.0320241	A kinase %28PRKA%29 anchor protein 12
XM_005684872.1	PLAGL1	0.623351	0.489303	0.493403	-	-	-	0.0544148	0.246988	0.079722	-	-2.07519	-	0.00546165	-	0.0410327	pleiomorphic adenoma gene-like 1%2C transcript variant X8
XM_005684858.1	HIVEP2	0.59272	0.589974	0.378453	-	-	-	0.123316	0.172224	0.145924	-	-1.82224	-	0.00670836	-	0.0456276	human immunodeficiency virus type I enhancer binding protein 2%2C transcript variant X1
XM_005684841.1	MAP7	2.58202	1.31599	2.4667	10.8649	17.6098	17.8293	10.8127	14.4579	13.0415	2.86297	2.58963	0.00457753	0.000719719	0.049484	0.0170282	microtubule-associated protein 7
XM_005684828.1	CTGF	20.466	15.209	31.5857	-	-	-	62.017	73.5266	78.4109	-	1.66947	-	0.00203672	-	0.0258873	connective tissue growth factor
XM_005684823.1	NT5E	1.23419	1.19694	0.864346	-	-	-	6.90456	8.0688	6.88852	-	2.72986	-	0.000110213	-	0.00880351	5%27-nucleotidase%2C ecto %28CD73%29
XM_005684814.1	ABRACL	9.17724	9.03625	6.41342	-	-	-	24.0019	28.1571	27.4353	-	1.69243	-	0.000304752	-	0.0121319	ABRA C-terminal like
XM_005684810.1	PERP	125.952	68.3801	145.846	-	-	-	490.518	594.561	619.787	-	2.3253	-	0.000580712	-	0.0153459	PERP%2C TP53 apoptosis effector
XM_005684804.1	PEX7	4.85317	6.06777	5.09468	-	-	-	10.9399	12.5265	9.20023	-	1.02833	-	0.00573099	-	0.0418657	peroxisomal biogenesis factor 7
XM_005684794.1	PDE7B	0.822794	1.23789	0.814085	0.181006	0.134297	0.106863	0.2873	0.122255	0.105229	-2.76756	-2.48141	0.00445752	0.00653662	0.0492282	0.0449694	phosphodiesterase 7B%2C transcript variant X2
XM_005684747.1	EPB41L2	1.50698	1.80167	1.65528	0.538593	0.874145	0.684531	0.178099	0.70734	0.782789	-1.24297	-1.57317	0.00177845	0.00620538	0.0349875	0.0437091	erythrocyte membrane protein band 4.1-like 2%2C transcript variant X5
XM_005684720.1	MRAP2	0.0519021	0.336112	0.0903808	1.50716	1.16483	1.1864	-	-	-	3.01173	-	0.00136772	-	0.0314837	-	melanocortin 2 receptor accessory protein 2
XM_005684643.1	PRDM1	4.90672	4.88429	5.84385	18.8256	25.4477	30.7762	22.3129	18.8373	23.552	2.26308	2.04905	0.00466443	0.00034834	0.0497727	0.0124979	PR domain containing 1%2C with ZNF domain
XM_005684642.1	AIM1	8.3643	9.13442	8.35442	44.3715	63.9444	66.246	54.8547	58.1739	46.0251	2.75533	2.6211	0.00203743	0.000257779	0.0376415	0.0114882	absent in melanoma 1
XM_005684624.1	DCBLD1	3.32708	3.13577	3.79446	9.38923	13.125	10.3545	12.4641	14.6542	9.6249	1.68006	1.84083	0.00268273	0.00385847	0.0409149	0.0343914	discoidin%2C CUB and LCCL domain containing 1
XM_005684596.1	FOXO3	15.8905	16.9864	17.5289	35.2947	37.7425	42.2185	43.5824	39.5355	33.2341	1.19318	1.20684	0.000487344	0.00196264	0.0232537	0.0254926	forkhead box O3
XM_005684576.1	WASF1	1.81315	2.26894	1.75028	0.72491	0.884616	0.825914	0.605582	0.644232	0.554516	-1.2599	-1.69262	0.00263602	0.00125431	0.0406636	0.0211619	WAS protein family%2C member 1
XM_005684551.1	LAMA4	3.3077	4.46255	3.25381	-	-	-	0.68715	1.55948	0.525737	-	-1.99146	-	0.00565541	-	0.0416675	laminin%2C alpha 4%2C transcript variant X2
XM_005684550.1	LAMA4	2.26038	2.09113	1.71504	-	-	-	0.186042	0.844441	0.0908555	-	-2.43565	-	0.0045276	-	0.037082	laminin%2C alpha 4%2C transcript variant X1
XM_005684537.1	FAM26E	4.86022	4.94807	4.77194	14.0633	14.5746	12.5083	10.4261	16.1127	13.493	1.49675	1.45714	0.00014264	0.00669637	0.0166985	0.0456035	family with sequence similarity 26%2C member E
XM_005684526.1	LOC102170698	0.405807	0.477811	0.32121	-	-	-	0.0354245	0.120593	0.0778497	-	-2.36506	-	0.00327478	-	0.0321845	platelet glycoprotein V-like
XM_005684517.1	GJA1	42.4484	48.5777	46.3461	240.314	375.689	284	263.143	293.982	286.465	2.71184	2.61845	0.00312115	1.54e-05	0.0429979	0.00411054	gap junction protein%2C alpha 1%2C 43kDa
XM_005684506.1	FABP7	4.78807	7.19002	5.07518	-	-	-	21.589	34.2519	29.4331	-	2.32206	-	0.00379662	-	0.0343364	fatty acid binding protein 7%2C brain
XM_005684480.1	CENPW	12.6261	17.8232	18.8817	3.35856	5.01838	4.86529	3.88707	5.67107	7.18638	-1.89735	-1.5588	0.00387829	0.00728529	0.0466106	0.047585	centromere protein W
XM_005684466.1	RWDD2A	6.26883	8.20561	5.51624	-	-	-	2.0492	2.03466	2.58006	-	-1.58488	-	0.00564896	-	0.0416675	RWD domain containing 2A
XM_005684457.1	ELOVL4	1.02076	0.465171	1.00726	19.0693	32.164	28.6478	43.8135	55.612	48.5376	5.00179	5.8911	0.00275307	0.000145882	0.0409262	0.00956479	ELOVL fatty acid elongase 4
XM_005684454.1	BCKDHB	7.94414	9.02831	8.53294	-	-	-	21.5301	30.0941	35.5646	-	1.77334	-	0.00738688	-	0.0480215	branched chain keto acid dehydrogenase E1%2C beta polypeptide
XM_005684448.1	HMGN3	61.1997	62.1486	56.3019	19.6716	26.4334	19.5763	11.975	16.8598	21.6867	-1.45164	-1.83022	0.000197193	0.000208563	0.0183826	0.0109203	high mobility group nucleosomal binding domain 3%2C transcript variant X3
XM_005684442.1	HTR1B	0.132311	0.0952037	0.115202	0.800446	1.069	0.724605	1.61989	1.8742	1.02376	2.92012	3.72055	0.00202957	0.00526861	0.0375914	0.0402733	5-hydroxytryptamine %28serotonin%29 receptor 1B%2C G protein-coupled
XM_005684433.1	COL12A1	432.427	462.331	389.417	44.9229	51.6745	18.5449	53.2641	71.4583	27.7091	-3.47935	-3.07461	7.68e-05	0.000106739	0.0145856	0.00880351	collagen%2C type XII%2C alpha 1
XM_005684421.1	PXDN	292.22	243.623	273.98	95.5906	85.7483	72.1018	71.6041	69.8645	53.7215	-1.67596	-2.05273	0.000295757	0.000178677	0.0204348	0.0103278	peroxidasin homolog %28Drosophila%29
XM_005684413.1	GSN	432.935	378.204	303.349	-	-	-	1052.49	986.055	1158.96	-	1.52056	-	0.000380998	-	0.0128588	gelsolin
XM_005684412.1	PHF19	27.0149	21.6693	26.6814	10.9342	12.73	13.6204	-	-	-	-1.01532	-	0.00261424	-	0.0406636	-	PHD finger protein 19
XM_005684408.1	DFNB31	1.90266	1.77735	2.44133	0.452343	0.359589	0.317923	0.160263	0.290972	0.258277	-2.43771	-3.10895	0.00131276	0.000962512	0.0311979	0.0190426	deafness%2C autosomal recessive 31
XM_005684407.1	AKNA	12.3653	9.41294	15.3117	2.81391	2.75676	2.32034	2.65386	2.92223	2.37608	-2.23275	-2.22161	0.00470566	0.00474329	0.049896	0.0381509	AT-hook transcription factor
XM_005684406.1	COL27A1	20.3877	28.0529	21.4166	7.0575	7.66923	7.52088	2.24567	3.79242	4.36421	-1.65076	-2.7475	0.00274985	0.0013375	0.0409262	0.0216826	collagen%2C type XXVII%2C alpha 1
XM_005684404.1	BSPRY	0.612738	0.104974	0.88917	4.15171	5.2911	4.8077	7.11649	6.04066	5.95198	3.14868	3.57193	0.000468698	0.000185477	0.0228936	0.0104724	B-box and SPRY domain containing
XM_005684401.1	SLC46A2	0.384575	1.22986	0.297639	3.01937	4.18123	4.23261	-	-	-	2.58002	-	0.0030472	-	0.0427142	-	solute carrier family 46%2C member 2
XM_005684395.1	LOC102173847	3.39954	2.77968	2.95993	1.1218	0.416158	0.5887	0.37095	0.589307	0.0543471	-2.10348	-3.17115	0.00114177	0.000356292	0.0304079	0.0125649	uncharacterized LOC102173847
XM_005684394.1	SVEP1	54.3828	48.2614	46.0583	16.8619	13.7249	7.30645	10.0347	12.6313	5.66178	-1.97242	-2.39214	0.000599748	0.000237084	0.0246388	0.0112217	sushi%2C von Willebrand factor type A%2C EGF and pentraxin domain containing 1
XM_005684393.1	C8H9orf152	0.50581	0.128453	0.336777	3.3696	5.34204	4.42078	5.22837	4.7009	4.08114	3.75746	3.85082	0.00220704	0.000239131	0.0381337	0.0112217	chromosome 8 open reading frame%2C human C9orf152
XM_005684390.1	KLF4	25.6213	34.875	20.2241	51.0221	56.5005	57.3022	67.5391	87.4274	95.1621	1.02993	1.63166	0.0040015	0.00367692	0.0474191	0.0337355	Kruppel-like factor 4 %28gut%29
XM_005684389.1	ZNF462	11.5957	16.2058	13.1057	4.92853	4.43745	3.97342	2.69443	3.74593	2.28749	-1.61666	-2.22866	0.00267554	0.00166705	0.0409149	0.0237754	zinc finger protein 462
XM_005684372.1	SH3YL1	2.31787	1.61401	1.30202	8.39537	10.9409	7.7623	7.82584	12.1392	12.9381	2.37226	2.65227	0.00200547	0.00465934	0.0375142	0.0377326	SH3 domain containing%2C Ysc84-like 1 %28S. cerevisiae%29
XM_005684354.1	TLR4	1.36312	0.851281	1.23164	-	-	-	3.63039	3.19476	3.58205	-	1.59457	-	0.000355891	-	0.0125649	toll-like receptor 4
XM_005684353.1	PAPPA	2.82132	2.99304	2.8344	1.48216	1.43955	0.987578	-	-	-	-1.14559	-	0.000705936	-	0.0259612	-	pregnancy-associated plasma protein A%2C pappalysin 1
XM_005684352.1	TNC	240.655	275.578	316.128	8.78477	14.048	9.03686	9.22967	8.91506	9.74025	-4.70696	-4.89965	0.000259274	0.000251299	0.019772	0.0114407	tenascin C
XM_005684346.1	C8H9orf91	1.11901	0.999011	1.55167	-	-	-	0.23878	0.225795	0.11661	-	-2.65859	-	0.0039378	-	0.0348573	chromosome 8 open reading frame%2C human C9orf91%2C transcript variant X1
XM_005684308.1	PTBP3	6.63194	4.39238	4.33075	-	-	-	16.4271	13.4672	16.2744	-	1.5882	-	0.00110443	-	0.0199042	polypyrimidine tract binding protein 3%2C transcript variant X3
XM_005684288.1	AKAP2	3.5476	4.51226	3.59845	1.1562	1.23315	0.830496	0.642308	1.06725	0.44531	-1.8563	-2.43569	0.00112426	0.00095179	0.0302915	0.018903	A kinase %28PRKA%29 anchor protein 2%2C transcript variant X1
XM_005684279.1	IKBKAP	7.34897	7.81308	7.62391	-	-	-	3.68684	3.59679	3.53177	-	-1.07506	-	9.55e-06	-	0.00369288	inhibitor of kappa light polypeptide gene enhancer in B-cells%2C kinase complex-associated protein%2C transcript variant X1
XM_005684237.1	S1PR3	6.92475	9.71164	10.0196	20.2791	24.7302	24.6068	-	-	-	1.38496	-	0.00125153	-	0.0309825	-	sphingosine-1-phosphate receptor 3
XM_005684236.1	CKS2	63.5362	56.267	60.2846	21.9455	35.4656	31.1622	23.4652	36.6861	25.5928	-1.02376	-1.07059	0.0024884	0.00240725	0.039968	0.0277859	CDC28 protein kinase regulatory subunit 2
XM_005684231.1	WNK2	5.17037	6.34902	2.83045	19.2545	15.3699	14.8766	14.2551	18.2	12.5004	1.78642	1.64747	0.00246907	0.00669962	0.0397979	0.0456038	WNK lysine deficient protein kinase 2
XM_005684221.1	RASEF	0.0188221	0.0541732	0.0819406	0.65588	0.946226	0.591586	-	-	-	3.82362	-	0.00355833	-	0.0449655	-	RAS and EF-hand domain containing
XM_005684204.1	PDLIM2	4.51559	2.75686	4.58694	52.7817	69.0361	80.4123	97.7576	89.907	137.351	4.0919	4.77641	0.00139358	0.00207448	0.0317116	0.0262028	PDZ and LIM domain 2 %28mystique%29
XM_005684200.1	LGI3	18.4883	13.9127	13.8846	4.00364	6.53152	6.12278	2.72756	2.06339	2.66406	-1.47435	-2.63428	0.00454776	0.00110895	0.0494218	0.0199042	leucine-rich repeat LGI family%2C member 3
XM_005684182.1	NFIL3	11.8028	10.2497	11.2953	-	-	-	30.2387	34.2024	35.6421	-	1.58554	-	0.000187544	-	0.0104977	nuclear factor%2C interleukin 3 regulated
XM_005684139.1	C8H9orf3	18.8793	16.056	22.353	75.1906	82.9598	108.639	97.948	101.248	106.221	2.21939	2.41447	0.00244301	1.05e-05	0.0396901	0.00369288	chromosome 8 open reading frame%2C human C9orf3
XM_005684138.1	FBP1	4.98186	0.434504	4.60052	-	-	-	26.0207	29.5268	35.096	-	3.17777	-	0.000877865	-	0.0183043	fructose-1%2C6-bisphosphatase 1
XM_005684135.1	DAPK1	15.7575	12.2699	16.209	7.09723	6.17462	6.13455	5.8618	7.78775	4.63705	-1.1887	-1.27445	0.0029784	0.00500762	0.0422862	0.0391221	death-associated protein kinase 1
XM_005684127.1	GOLM1	7.85493	11.3895	7.66816	-	-	-	0.685688	1.2968	2.63704	-	-2.54247	-	0.00518153	-	0.0399473	golgi membrane protein 1%2C transcript variant X2
XM_005684126.1	GOLM1	1.2869	0.854751	0.905008	-	-	-	0.23764	0.215728	0.382977	-	-1.86506	-	0.00728331	-	0.047585	golgi membrane protein 1%2C transcript variant X1
XM_005684093.1	CCL27	0.867879	1.24895	1.13347	-	-	-	176.882	115.37	144.377	-	7.06969	-	0.0012446	-	0.0211492	chemokine %28C-C motif%29 ligand 27
XM_005684088.1	IL11RA	14.2821	12.7382	16.6433	3.73205	4.485	1.75853	0.834318	2.48519	2.44469	-2.12996	-2.92124	0.00129835	0.000554503	0.0309825	0.0149878	interleukin 11 receptor%2C alpha%2C transcript variant X1
XM_005684076.1	ENHO	50.5873	41.2209	67.3811	-	-	-	11.152	13.5065	14.9247	-	-2.00778	-	0.00671278	-	0.0456276	energy homeostasis associated
XM_005684068.1	KIF24	5.00086	5.15564	4.46838	1.57121	2.31091	1.78027	1.54293	1.9295	1.85686	-1.36894	-1.45641	0.000593369	0.000206121	0.0246388	0.0109203	kinesin family member 24
XM_005684063.1	AQP3	9.2587	2.76537	2.23083	80.3197	117.618	132.386	124.523	173.661	166.38	4.53435	5.02635	0.00254013	0.000632583	0.0402786	0.0158992	aquaporin 3 %28Gill blood group%29
XM_005684031.1	DPYSL2	72.1748	76.0141	78.1624	34.8996	35.0193	28.0349	26.318	38.3935	26.9997	-1.20839	-1.3034	0.000122291	0.000471899	0.0162008	0.0139735	dihydropyrimidinase-like 2
XM_005684007.1	LOXL2	142.875	153.503	132	58.7917	61.0138	42.2464	27.5149	22.8532	28.1702	-1.40243	-2.44742	0.000492034	5.43e-05	0.0233231	0.00700034	lysyl oxidase-like 2
XM_005683946.1	SHB	20.0695	15.8108	18.7865	-	-	-	46.9217	37.0808	51.6697	-	1.31139	-	0.00381084	-	0.0343364	Src homology 2 domain containing adaptor protein B
XM_005683906.1	CORO2A	0.385008	0.215467	0.11174	1.13871	1.38251	1.62976	1.97172	1.84119	1.86564	2.54307	2.99514	0.00213472	4.95e-05	0.0379278	0.00679205	coronin%2C actin binding protein%2C 2A
XM_005683895.1	TDRD7	0.320155	0.364745	0.301984	-	-	-	0.102475	0.116283	0.0938334	-	-1.65861	-	0.000340522	-	0.0124319	tudor domain containing 7%2C transcript variant X1
XM_005683864.1	GLIPR2	149.049	153.742	104.501	-	-	-	25.2068	45.2428	40.3035	-	-1.87871	-	0.00417774	-	0.0359048	GLI pathogenesis-related 2
XM_005683859.1	HRCT1	0.703946	1.35072	0.340509	-	-	-	12.6178	14.2327	11.6088	-	4.00513	-	0.000125529	-	0.00936312	histidine rich carboxyl terminus 1
XM_005683843.1	TPM2	2.45774	1.76845	2.49657	0.396497	0.735452	0.585211	-	-	-	-1.96903	-	0.00286197	-	0.041569	-	tropomyosin 2 %28beta%29%2C transcript variant X3
XM_005683841.1	TPM2	10.2406	11.0528	12.4829	25.574	31.6244	37.2584	-	-	-	1.48365	-	0.00416642	-	0.0482239	-	tropomyosin 2 %28beta%29%2C transcript variant X1
XM_005683838.1	ARHGEF39	11.7425	14.1967	12.899	-	-	-	4.65446	5.13285	7.63553	-	-1.1565	-	0.00359244	-	0.0334148	Rho guanine nucleotide exchange factor %28GEF%29 39
XM_005683817.1	FANCG	1.31237	1.5191	1.2917	0.607541	0.563456	0.434765	-	-	-	-1.3605	-	0.000711725	-	0.0259644	-	Fanconi anemia%2C complementation group G%2C transcript variant X1
XM_005683812.1	TLE4	4.26262	6.11723	4.08254	13.3408	14.8388	18.6754	12.6886	11.9986	11.627	1.6959	1.32823	0.00326269	0.000539789	0.0437723	0.0148254	transducin-like enhancer of split 4 %28E%28sp1%29 homolog%2C Drosophila%29
XM_005683795.1	PRUNE2	3.85912	3.55539	3.64997	1.47221	1.50124	0.972944	-	-	-	-1.48733	-	0.000254163	-	0.0197715	-	prune homolog 2 %28Drosophila%29
XM_005683789.1	PCSK5	2.16058	2.28483	1.59616	-	-	-	0.471514	0.499378	0.621725	-	-1.92352	-	0.00239274	-	0.0277355	proprotein convertase subtilisin%2Fkexin type 5%2C transcript variant X2
XM_005683775.1	APBA1	10.2651	10.2796	11.1093	3.48175	2.25428	1.87457	2.23206	2.58828	1.36057	-2.0563	-2.3565	0.000138021	5.03e-05	0.0166985	0.00679205	amyloid beta %28A4%29 precursor protein-binding%2C family A%2C member 1
XM_005683770.1	PGM5	58.2424	60.3342	61.2639	31.1729	18.0302	17.1882	10.9947	23.8421	17.7303	-1.43765	-1.77449	0.00120839	0.000372529	0.0308781	0.0128454	phosphoglucomutase 5
XM_005683766.1	SMARCA2	67.2482	77.2124	77.4962	34.4911	28.4884	22.4741	18.375	37.4908	23.2803	-1.37706	-1.48769	0.000711318	0.00201459	0.0259644	0.0258144	SWI%2FSNF related%2C matrix associated%2C actin dependent regulator of chromatin%2C subfamily a%2C member 2
XM_005683763.1	GLIS3	2.35732	2.53442	1.88542	-	-	-	0.43429	0.74668	0.453101	-	-2.05221	-	0.00142543	-	0.0223713	GLIS family zinc finger 3
XM_005683755.1	PPAPDC2	1.50748	1.17324	1.50005	-	-	-	3.42681	4.52548	5.43172	-	1.67867	-	0.0065195	-	0.0449554	phosphatidic acid phosphatase type 2 domain containing 2
XM_005683753.1	ALDH1A1	1.25256	1.68624	1.09058	5.98386	4.64285	4.15619	9.27279	16.9061	15.2338	1.8753	3.36144	0.00336634	0.00583327	0.0438598	0.0422644	aldehyde dehydrogenase 1 family%2C member A1
XM_005683677.1	TMEM261	75.8143	67.1823	86.8281	-	-	-	31.9678	38.7487	37.0426	-	-1.09273	-	0.00252839	-	0.0282366	transmembrane protein 261
XM_005683669.1	PTPLAD2	4.33142	5.39598	5.2348	1.93987	2.49553	2.03192	-	-	-	-1.21008	-	0.00161901	-	0.033494	-	protein tyrosine phosphatase-like A domain containing 2
XM_005683654.1	FREM1	7.74349	10.4532	11.2533	-	-	-	2.33039	2.6321	1.22276	-	-2.25136	-	0.00248131	-	0.0280067	FRAS1 related extracellular matrix 1
XM_005683638.1	ADAMTSL1	28.3759	25.0342	24.6489	8.40322	5.15111	3.5279	2.5088	2.48649	1.65169	-2.19207	-3.55379	0.000397173	4.02e-05	0.0216375	0.00636665	ADAMTS-like 1
XM_005683634.1	PLIN2	0.452268	0.610173	0.295337	-	-	-	1.30285	1.232	1.67018	-	1.63087	-	0.00437243	-	0.0366797	perilipin 2%2C transcript variant X2
XM_005683633.1	PLIN2	1.19135	0.593463	1.03729	-	-	-	2.99192	3.69463	3.15863	-	1.80265	-	0.00108275	-	0.0197486	perilipin 2%2C transcript variant X1
XM_005683604.1	CDKN2B	2.00491	1.15409	1.83293	17.3689	26.0077	27.402	21.3695	17.149	17.6284	3.82564	3.49154	0.00223422	0.000232278	0.0383275	0.0112217	cyclin-dependent kinase inhibitor 2B %28p15%2C inhibits CDK4%29
XM_005683560.1	CLU	88.7867	65.6499	82.2354	201.038	221.037	272.261	466.413	305.497	355.75	1.55274	2.25237	0.0023882	0.0034749	0.0395563	0.0330836	clusterin
XM_005683559.1	SCARA3	18.7154	16.5636	18.8855	9.49691	8.69414	8.80208	-	-	-	-1.00476	-	0.000327786	-	0.0211388	-	scavenger receptor class A%2C member 3%2C transcript variant X1
XM_005683549.1	PNOC	2.51534	2.88452	2.60071	-	-	-	0.150957	0.685192	0.110582	-	-3.07908	-	0.000405735	-	0.013128	prepronociceptin%2C transcript variant X2
XM_005683525.1	CTSB	254.478	214.899	223.612	-	-	-	596.128	470.507	586.261	-	1.25409	-	0.00160514	-	0.0234274	cathepsin B
XM_005683516.1	MFAP3L	1.82351	1.41302	2.25942	14.3242	18.3847	21.5761	-	-	-	3.30411	-	0.00153211	-	0.0332997	-	microfibrillar-associated protein 3-like
XM_005683511.1	LOC102191795	6.52929	6.57734	4.658	-	-	-	0.687638	1.83599	1.06671	-	-2.30682	-	0.00274034	-	0.0294532	uncharacterized LOC102191795
XM_005683498.1	EFNA5	23.1986	20.0113	21.498	10.2427	11.0218	11.0476	-	-	-	-1.00187	-	0.000352797	-	0.0212711	-	ephrin-A5
XM_005683485.1	RGMB	102.327	81.8386	83.1065	35.7056	30.7995	33.7686	29.6674	34.4598	40.1485	-1.41437	-1.35791	0.00119932	0.00172942	0.0308781	0.0240799	RGM domain family%2C member B
XM_005683481.1	GPR98	1.03109	1.02235	0.863389	0.085956	0.07529	0.0892769	0.108957	0.107511	0.138809	-3.54138	-3.03738	8.37e-05	0.000103762	0.0147234	0.00880351	G protein-coupled receptor 98
XM_005683462.1	PAM	149.205	153.206	171.389	51.4394	46.7088	36.0243	38.8186	46.9444	34.5964	-1.82019	-1.97693	0.000160194	0.000107976	0.0174374	0.00880351	peptidylglycine alpha-amidating monooxygenase
XM_005683455.1	LIX1	11.8739	12.1112	12.8414	0.685569	1.15944	0.436492	0.480071	0.226983	0.29306	-4.01269	-5.20251	5.71e-06	2.41e-06	0.00703491	0.00243567	Lix1 homolog %28chicken%29
XM_005683447.1	ELL2	0.094419	0.0679385	0.0411046	-	-	-	0.543986	0.411523	0.597737	-	2.93245	-	0.00143374	-	0.0224272	elongation factor%2C RNA polymerase II%2C 2%2C transcript variant X1
XM_005683402.1	WWC1	4.03991	3.58971	4.36735	-	-	-	11.7159	14.5058	17.1456	-	1.85394	-	0.00272681	-	0.0294096	WW and C2 domain containing 1
XM_005683399.1	HAPLN1	0.0908535	0.163432	0.0791048	-	-	-	0.959646	1.73243	1.34205	-	3.59697	-	0.00535843	-	0.0406312	hyaluronan and proteoglycan link protein 1
XM_005683396.1	VCAN	2.42842	2.54571	2.30578	0.303956	0.42285	0.239267	0.331685	0.479027	0.117805	-2.91371	-2.97092	1.79e-05	7.28e-05	0.0108542	0.00801668	versican%2C transcript variant X2
XM_005683395.1	VCAN	0.978742	1.43121	1.40884	0.0764014	0.0637717	0.045106	0.0454752	0.0344019	0.0222083	-4.36535	-5.22527	0.00119927	0.00109638	0.0308781	0.0198441	versican%2C transcript variant X1
XM_005683360.1	NIPAL4	2.62189	1.63914	2.91904	-	-	-	15.6423	17.75	15.389	-	2.76426	-	7.97e-05	-	0.00822712	NIPA-like domain containing 4
XM_005683356.1	GALNT10	23.4464	22.219	21.2831	12.8927	10.5689	8.55238	10.2511	9.89293	5.22845	-1.06435	-1.39979	0.00114665	0.00133119	0.0304079	0.0216349	UDP-N-acetyl-alpha-D-galactosamine:polypeptide N-acetylgalactosaminyltransferase 10 %28GalNAc-T10%29
XM_005683352.1	ARSI	11.916	9.35354	11.0182	3.6223	4.19932	3.28284	2.03311	2.25341	2.63231	-1.53985	-2.22239	0.000896022	0.00039222	0.0285374	0.0129952	arylsulfatase family%2C member I
XM_005683349.1	LOC100861303	59.44	50.3776	53.1511	24.4642	13.037	13.3706	-	-	-	-1.67966	-	0.0012633	-	0.0309825	-	colony stimulating factor receptor
XM_005683337.1	LOC102191519	54.1744	54.3708	59.9789	26.6944	24.628	19.9509	19.4654	24.0909	19.8868	-1.24152	-1.40942	0.000299262	0.000130037	0.0204377	0.00937708	uncharacterized LOC102191519
XM_005683336.1	PCDHGA2	2.50507	2.85716	2.6916	-	-	-	0.358259	1.36479	0.712334	-	-1.72553	-	0.0038688	-	0.0344618	protocadherin gamma subfamily A%2C 2
XM_005683334.1	PCDHB14	1.78379	1.68184	2.73134	-	-	-	0.354383	0.469157	0.216333	-	-2.57516	-	0.00735523	-	0.0478596	protocadherin beta 14
XM_005683329.1	PCDHB6	6.21185	6.8287	6.00952	3.25692	3.02059	2.17756	-	-	-	-1.17191	-	0.000997334	-	0.0293648	-	protocadherin beta 6
XM_005683326.1	LOC102187401	0.923427	0.664445	0.908886	-	-	-	0.192762	0.174989	0.141206	-	-2.29444	-	0.0014844	-	0.0226736	protocadherin alpha-7-like
XM_005683325.1	LOC102187129	0.279209	0.42007	0.353605	-	-	-	0.0487466	0.11063	0.0892721	-	-2.08217	-	0.00384083	-	0.0343364	protocadherin alpha-1-like
XM_005683316.1	SPOCK1	38.6864	49.6807	36.8207	6.74611	3.87061	2.13765	-	-	-	-3.29503	-	0.000897135	-	0.0285374	-	sparc%2Fosteonectin%2C cwcv and kazal-like domains proteoglycan %28testican%29 1
XM_005683315.1	TGFBI	520.751	428.243	341.568	-	-	-	83.4888	129.255	100.062	-	-2.04466	-	0.00365585	-	0.0336652	transforming growth factor%2C beta-induced%2C 68kDa
XM_005683310.1	PHF15	3.56205	3.095	3.05461	-	-	-	9.11245	9.24184	8.93498	-	1.49055	-	5.99e-06	-	0.00369288	PHD finger protein 15
XM_005683302.1	PLK5	0.336995	0.687034	0.733543	1.46788	1.56305	1.71182	-	-	-	1.43214	-	0.00229375	-	0.0389929	-	polo-like kinase 5
XM_005683288.1	LOC102172994	31.6889	22.997	33.7717	-	-	-	10.6321	9.58518	10.0581	-	-1.54684	-	0.00425125	-	0.0361882	lipid phosphate phosphatase-related protein type 3-like
XM_005683282.1	HCN2	0.764023	1.09949	1.48396	-	-	-	8.97299	5.18709	6.40771	-	2.61924	-	0.00719067	-	0.0473102	hyperpolarization activated cyclic nucleotide-gated potassium channel 2
XM_005683266.1	PCDHGB6	11.2511	9.42428	10.5813	4.78018	3.77796	3.55834	3.75241	4.9599	1.84259	-1.36719	-1.56625	0.000614013	0.00280085	0.0248394	0.029821	protocadherin gamma subfamily B%2C 6
XM_005683265.1	PCDHGA8	6.39504	7.18876	7.45911	2.52276	3.55288	3.07991	2.59533	3.26058	1.23916	-1.20062	-1.56845	0.000816838	0.00232982	0.0276021	0.0274511	protocadherin gamma subfamily A%2C 8
XM_005683256.1	ATP10B	0.277063	0.583837	0.292928	-	-	-	2.52743	3.51491	2.61708	-	2.90784	-	0.00163585	-	0.0235363	ATPase%2C class V%2C type 10B
XM_005683214.1	GEMIN5	0.246667	0.307645	0.272042	0.0795875	0.103337	0.093974	-	-	-	-1.5774	-	0.000645887	-	0.0252229	-	gem %28nuclear organelle%29 associated protein 5%2C transcript variant X1
XM_005683212.1	CNOT8	3.03862	2.73302	2.64568	1.32356	1.12522	1.44704	1.7142	1.32438	0.881674	-1.11143	-1.10242	0.000574564	0.00503908	0.0243248	0.0392501	CCR4-NOT transcription complex%2C subunit 8%2C transcript variant X1
XM_005683186.1	ANXA6	9.04173	5.03595	9.15714	-	-	-	0.581233	1.19544	0.798331	-	-3.17364	-	0.00728952	-	0.047585	annexin A6%2C transcript variant X2
XM_005683185.1	ANXA6	30.5757	25.6223	33.032	7.199	5.9685	4.00688	2.92156	6.05745	5.65424	-2.37727	-2.60828	0.00053289	0.000483122	0.0238476	0.0139735	annexin A6%2C transcript variant X1
XM_005683171.1	CD74	1.95874	2.72159	3.64613	-	-	-	11.2202	13.2473	16.8186	-	2.30988	-	0.00300195	-	0.0308064	CD74 molecule%2C major histocompatibility complex%2C class II invariant chain%2C transcript variant X2
XM_005683170.1	CD74	4.62995	3.50229	6.82208	20.5693	14.2276	17.2997	26.39	44.1104	48.726	1.80063	2.99507	0.00395719	0.0072106	0.0470582	0.0473599	CD74 molecule%2C major histocompatibility complex%2C class II invariant chain%2C transcript variant X1
XM_005683157.1	ARHGEF37	5.20674	3.82973	4.08009	-	-	-	16.1101	19.2054	16.4269	-	1.97996	-	0.000274041	-	0.0117023	Rho guanine nucleotide exchange factor %28GEF%29 37
XM_005683070.1	PCDH12	5.40128	5.82967	4.96203	-	-	-	1.32725	2.08536	1.22655	-	-1.80343	-	0.000476422	-	0.0139735	protocadherin 12%2C transcript variant X1
XM_005683056.1	PCDHB7	3.4403	3.63279	3.18993	1.08119	1.16317	0.0851083	0.471927	1.7526	1.44568	-2.13939	-1.48352	0.00201614	0.00568273	0.0375178	0.0417119	protocadherin beta 7
XM_005683042.1	CD14	3.84029	3.77369	2.91948	-	-	-	14.2825	15.2701	15.1797	-	2.08634	-	1.23e-05	-	0.00390294	CD14 molecule
XM_005683031.1	CYSTM1	12.6637	6.33882	8.53324	-	-	-	75.6041	65.0335	80.2473	-	3.00392	-	0.000188147	-	0.0104977	cysteine-rich transmembrane module containing 1%2C transcript variant X3
XM_005683025.1	CXXC5	14.3107	21.3966	11.3274	36.2192	33.3686	32.7474	-	-	-	1.12151	-	0.00436169	-	0.0488614	-	CXXC finger protein 5
XM_005683015.1	SPATA24	19.4629	25.3045	21.8546	-	-	-	10.9556	9.65293	10.8579	-	-1.08219	-	0.00256806	-	0.0285	spermatogenesis associated 24
XM_005682993.1	EGR1	14.5668	14.9462	9.50512	50.5544	51.6819	65.0402	60.9844	74.6613	76.8133	2.10002	2.44497	0.00100494	0.000388767	0.0293648	0.0129633	early growth response 1
XM_005682978.1	KIF20A	5.08711	4.27375	4.02226	1.17113	1.72797	1.17855	1.74269	1.55804	0.735007	-1.7146	-1.72951	0.00111316	0.00221445	0.0301471	0.0269732	kinesin family member 20A%2C transcript variant X1
XM_005682937.1	TCF7	0.884342	0.88106	0.888443	2.50216	2.38166	2.39726	-	-	-	1.45607	-	2.18e-06	-	0.00448219	-	transcription factor 7 %28T-cell specific%2C HMG-box%29%2C transcript variant X4
XM_005682932.1	C7H5orf15	30.7937	44.407	38.2065	-	-	-	11.3348	16.1243	14.5005	-	-1.43444	-	0.00468395	-	0.0378454	chromosome 7 open reading frame%2C human C5orf15
XM_005682931.1	FSTL4	2.00398	1.75738	1.69031	0.51525	0.534081	0.566636	0.21047	0.136474	0.33038	-1.7543	-3.00878	0.000187818	0.000136744	0.0182977	0.00949865	follistatin-like 4
XM_005682915.1	LOC102191038	3.7111	2.95786	3.05721	-	-	-	1.23353	1.46195	1.58633	-	-1.18365	-	0.00214846	-	0.0266383	PWWP domain-containing protein MUM1-like%2C transcript variant X1
XM_005682810.1	ZNF346	8.46617	9.62499	7.07651	-	-	-	2.31691	4.38183	2.94781	-	-1.38349	-	0.00566999	-	0.0416996	zinc finger protein 346
XM_005682794.1	ZNF496	0.843254	0.874859	0.990328	0.36066	0.387304	0.410912	0.26363	0.320521	0.262091	-1.22474	-1.67832	0.000389448	0.000217545	0.0216375	0.0110503	zinc finger protein 496%2C transcript variant X1
XM_005682770.1	B4GALT7	3.04083	2.3457	3.00539	0.822025	1.40179	0.730572	0.657636	0.925349	0.770792	-1.50614	-1.83402	0.00419986	0.00108824	0.0482383	0.0197969	xylosylprotein beta 1%2C4-galactosyltransferase%2C polypeptide 7%2C transcript variant X2
XM_005682757.1	DBN1	285.567	245.118	215.596	91.0046	97.0192	80.8069	63.1352	78.3216	65.9131	-1.47302	-1.84751	0.00157503	0.000990529	0.033494	0.0192804	drebrin 1
XM_005682755.1	RGS14	0.732429	0.421611	0.82903	-	-	-	1.54727	1.79566	1.49407	-	1.28638	-	0.0034964	-	0.0331223	regulator of G-protein signaling 14
XM_005682754.1	MXD3	34.5342	26.5583	41.6673	-	-	-	7.2514	6.93412	11.161	-	-2.01941	-	0.00484721	-	0.0385355	MAX dimerization protein 3
XM_005682749.1	RAB24	1.08103	1.48499	1.06959	0.190253	0.308783	0.140402	-	-	-	-2.50732	-	0.00235539	-	0.0392837	-	RAB24%2C member RAS oncogene family%2C transcript variant X1
XM_005682739.1	NOP16	36.1836	29.4729	34.0709	-	-	-	74.5644	66.3382	60.5554	-	1.01442	-	0.00169115	-	0.023943	NOP16 nucleolar protein
XM_005682736.1	SEMA6A	35.845	39.3617	30.8882	-	-	-	15.2216	19.0545	12.8573	-	-1.17053	-	0.00298375	-	0.0306863	sema domain%2C transmembrane domain %28TM%29%2C and cytoplasmic domain%2C %28semaphorin%29 6A
XM_005682730.1	PRDM6	2.81202	2.68157	3.21535	1.27897	1.09492	0.677635	0.26026	1.18131	0.762603	-1.51297	-1.98226	0.00141074	0.00222458	0.0317142	0.0270152	PR domain containing 6
XM_005682726.1	FBN2	206.29	209.642	212.084	20.7015	26.7236	14.35	5.04434	9.47051	6.83866	-3.3457	-4.87826	1.14e-06	7.17e-08	0.00412309	0.000456687	fibrillin 2
XM_005682698.1	ZNF608	12.5336	15.4477	17.4429	-	-	-	4.91112	5.99138	4.79205	-	-1.5332	-	0.00255949	-	0.0284453	zinc finger protein 608
XM_005682690.1	LMNB1	68.4778	101.331	84.0244	-	-	-	19.6632	33.1106	27.12	-	-1.66772	-	0.00482151	-	0.0384095	lamin B1
XM_005682678.1	SLC22A5	2.11331	2.32844	2.01253	-	-	-	4.37561	5.07314	5.13314	-	1.17585	-	0.000481785	-	0.0139735	solute carrier family 22 %28organic cation%2Fcarnitine transporter%29%2C member 5
XM_005682667.1	GNA15	2.2805	0.846098	1.76842	6.4498	9.34054	9.4687	10.0252	10.9878	10.9281	2.36741	2.70603	0.0031761	6.62e-05	0.0433473	0.00781083	guanine nucleotide binding protein %28G protein%29%2C alpha 15 %28Gq class%29
XM_005682661.1	MFSD12	10.9595	11.1986	8.148	-	-	-	31.0906	29.0092	33.8987	-	1.63302	-	0.000248829	-	0.0114407	major facilitator superfamily domain containing 12
XM_005682657.1	TJP3	1.68229	0.379757	1.20626	-	-	-	5.09956	4.56466	4.91897	-	2.15769	-	0.000787981	-	0.0175036	tight junction protein 3
XM_005682602.1	GADD45B	8.73991	8.59726	7.70604	36.6236	40.8189	33.9291	36.0128	38.6955	32.2951	2.15289	2.09516	0.000143934	0.000131399	0.0166985	0.00937708	growth arrest and DNA-damage-inducible%2C beta
XM_005682564.1	EBI3	15.1422	14.0334	18.405	2.22786	1.84871	1.61527	1.04689	0.659972	1.02251	-3.06341	-4.12373	0.000457493	0.000344378	0.0226545	0.0124319	Epstein-Barr virus induced 3
XM_005682559.1	LOC102172140	76.535	54.6507	72.9602	-	-	-	29.875	36.4994	34.0386	-	-1.02366	-	0.00801052	-	0.0499575	hepatoma-derived growth factor-related protein 2-like
XM_005682556.1	SEMA6B	16.4307	14.4801	13.5226	-	-	-	6.63828	7.89391	7.19429	-	-1.03219	-	0.00123783	-	0.0210854	sema domain%2C transmembrane domain %28TM%29%2C and cytoplasmic domain%2C %28semaphorin%29 6B
XM_005682552.1	PTPRS	67.7361	53.916	66.8844	-	-	-	25.4669	32.4051	24.4157	-	-1.19609	-	0.00230214	-	0.0273707	protein tyrosine phosphatase%2C receptor type%2C S
XM_005682536.1	CRB3	0.850405	0.458927	1.66598	11.7299	12.7873	18.224	16.5359	18.5324	15.4032	3.84452	4.08436	0.00290929	8.64e-05	0.0416582	0.00832892	crumbs homolog 3 %28Drosophila%29
XM_005682516.1	C7H19orf70	29.9693	19.1592	29.9739	-	-	-	50.9223	64.9461	64.0257	-	1.18535	-	0.00438206	-	0.0366797	chromosome 7 open reading frame%2C human C19orf70%2C transcript variant X2
XM_005682489.1	ADAMTS10	18.4863	14.8739	19.025	-	-	-	7.65997	8.91887	7.73375	-	-1.10746	-	0.00237399	-	0.0277135	ADAM metallopeptidase with thrombospondin type 1 motif%2C 10
XM_005682483.1	FBN3	22.1312	24.7788	17.6635	2.96501	3.54913	3.10929	0.234088	0.785342	0.849938	-2.74632	-5.11032	0.000923704	0.000557144	0.0285935	0.0150111	fibrillin 3
XM_005682477.1	CAMSAP3	3.8303	0.297952	3.15471	-	-	-	32.1077	31.8094	25.6319	-	3.62008	-	0.000319817	-	0.0123216	calmodulin regulated spectrin-associated protein family%2C member 3
XM_005682476.1	PNPLA6	8.09889	6.57143	7.93304	13.844	16.5713	18.1354	-	-	-	1.10295	-	0.00299941	-	0.0423616	-	patatin-like phospholipase domain containing 6
XM_005682465.1	CARM1	60.6655	47.9091	59.6379	-	-	-	22.9569	35.298	22.3664	-	-1.06105	-	0.00765193	-	0.0486334	coactivator-associated arginine methyltransferase 1
XM_005682460.1	AP1M2	6.89386	2.91066	6.74648	-	-	-	47.5416	45.1322	36.2288	-	2.96129	-	0.000524677	-	0.0145799	adaptor-related protein complex 1%2C mu 2 subunit
XM_005682450.1	ANGPTL6	24.3783	24.5577	25.9924	1.57314	2.15009	1.30351	0.0821364	1.21165	0.842355	-3.89782	-5.13243	2.12e-06	2.38e-06	0.00448219	0.00243567	angiopoietin-like 6
XM_005682449.1	COL5A3	97.3406	105.603	72.8466	31.4121	29.3301	19.4842	18.8296	25.712	31.4853	-1.78142	-1.85899	0.00342556	0.00315925	0.0440982	0.0317539	collagen%2C type V%2C alpha 3
XM_005682411.1	LOC102172254	1.21412	0.953032	0.480509	-	-	-	43.0301	27.6613	31.8319	-	5.27509	-	0.00192404	-	0.0252711	CD209 antigen-like protein 2-like
XM_005682404.1	STXBP2	1.1032	0.491399	0.73184	2.59334	3.39552	3.30229	4.13643	3.43448	3.28876	1.99773	2.22279	0.00169108	0.000847968	0.0340818	0.0180171	syntaxin binding protein 2%2C transcript variant X1
XM_005682398.1	INSR	18.5147	21.5875	17.9666	10.5053	7.36856	8.10919	-	-	-	-1.1602	-	0.00190388	-	0.0366287	-	insulin receptor
XM_005682394.1	ACP5	32.7609	22.3101	31.0713	-	-	-	80.6427	57.3702	63.6463	-	1.22713	-	0.00738131	-	0.0480073	acid phosphatase 5%2C tartrate resistant
XM_005682380.1	TMEM205	3.15026	3.21122	4.3429	6.98798	9.42679	8.87624	-	-	-	1.24042	-	0.00431481	-	0.048647	-	transmembrane protein 205%2C transcript variant X1
XM_005682375.1	LDLR	78.8135	67.4571	69.625	13.4687	26.5247	21.0389	13.7789	25.1352	14.5286	-1.82269	-2.01427	0.000553647	0.000430631	0.0240885	0.0134722	low density lipoprotein receptor
XM_005682363.1	CDKN2D	17.1641	14.7226	18.3218	-	-	-	4.56268	4.86049	9.14029	-	-1.43547	-	0.00440514	-	0.0367882	cyclin-dependent kinase inhibitor 2D %28p19%2C inhibits CDK4%29
XM_005682354.1	ICAM1	1.06554	0.862538	1.27565	-	-	-	2.14225	2.35835	2.01431	-	1.02399	-	0.00210071	-	0.0263188	intercellular adhesion molecule 1%2C transcript variant X2
XM_005682353.1	ICAM1	0.425883	0.525327	0.582702	-	-	-	1.4021	1.72362	1.13409	-	1.47357	-	0.00674886	-	0.0458051	intercellular adhesion molecule 1%2C transcript variant X1
XM_005682351.1	S1PR2	84.1832	67.0485	79.5527	29.6087	32.607	27.6134	25.1914	27.6765	17.9688	-1.36129	-1.70398	0.000906757	0.000824155	0.0285591	0.0178048	sphingosine-1-phosphate receptor 2
XM_005682345.1	LOC102178814	35.5386	27.1247	38.4609	6.98186	9.92554	6.26819	1.46612	3.21262	1.44434	-2.12545	-4.04573	0.00190898	0.000780743	0.0366559	0.0175036	noelin-2-like
XM_005682313.1	PODNL1	0.256153	0.184313	0.446057	-	-	-	3.11558	2.97717	2.46246	-	3.27057	-	0.000278799	-	0.0117023	podocan-like 1
XM_005682308.1	ASF1B	28.2474	24.8789	31.0457	10.9568	14.4574	14.9956	-	-	-	-1.05864	-	0.00262361	-	0.0406636	-	anti-silencing function 1B histone chaperone
XM_005682307.1	LPHN1	31.4406	27.7051	29.2917	-	-	-	11.8912	18.2911	11.7434	-	-1.07683	-	0.00302402	-	0.0308764	latrophilin 1
XM_005682285.1	JUNB	7.82878	6.49376	6.91108	95.5657	136.07	171.601	168.412	127.482	185.55	4.24721	4.50295	0.00440527	0.000879567	0.0489436	0.0183043	jun B proto-oncogene
XM_005682261.1	ZSWIM4	4.29867	3.74796	4.16949	-	-	-	9.15628	7.53698	9.06132	-	1.07604	-	0.00120533	-	0.0208317	zinc finger%2C SWIM-type containing 4
XM_005682241.1	SYDE1	26.3247	22.3185	27.0385	13.1664	10.697	10.476	6.51308	10.6666	7.81428	-1.14008	-1.59837	0.00126836	0.00090829	0.0309825	0.0185213	synapse defective 1%2C Rho GTPase%2C homolog 1 %28C. elegans%29
XM_005682235.1	LOC102187582	1.08386	0.249562	0.868204	26.8996	37.7912	45.8757	61.6128	42.2796	39.7056	5.6502	6.02732	0.00278785	0.00242584	0.0411961	0.027905	cytochrome P450 4F22-like
XM_005682234.1	LOC102187311	1.78313	1.3122	2.01125	-	-	-	3.77467	4.68071	5.33065	-	1.43278	-	0.00430234	-	0.0363315	cytochrome P450 4F6-like
XM_005682223.1	PGLYRP2	0.512306	0.368626	1.8214	-	-	-	5.49325	4.27968	5.37538	-	2.48688	-	0.00233013	-	0.0274511	peptidoglycan recognition protein 2
XM_005682195.1	FAM129C	2.23761	1.95732	1.64265	-	-	-	0.25278	0.621489	0.308619	-	-2.30306	-	0.00168326	-	0.0238791	family with sequence similarity 129%2C member C
XM_005682194.1	COLGALT1	184.059	151.473	174.456	52.2036	53.4407	51.5129	44.6205	52.7774	45.7572	-1.69826	-1.83288	0.000263731	0.00025664	0.0198972	0.0114735	collagen beta%281-O%29galactosyltransferase 1
XM_005682192.1	MAP1S	19.0174	16.3815	19.7279	9.88771	5.65823	6.41714	4.59138	7.16381	5.27437	-1.32767	-1.69471	0.00259765	0.000572429	0.0406636	0.015249	microtubule-associated protein 1S
XM_005682191.1	FCHO1	0.861649	0.800824	0.875263	-	-	-	9.06675	8.68455	7.17209	-	3.29589	-	0.000208938	-	0.0109203	FCH domain only 1
XM_005682186.1	ARRDC2	4.41045	3.68246	2.68084	12.5657	13.895	18.6653	-	-	-	2.06644	-	0.00395798	-	0.0470582	-	arrestin domain containing 2
XM_005682182.1	RAB3A	9.61641	6.51239	7.38782	-	-	-	0.950558	2.00319	1.69107	-	-2.33999	-	0.00297409	-	0.0306315	RAB3A%2C member RAS oncogene family
XM_005682177.1	CRLF1	5.28659	4.39263	5.31532	23.8192	25.0287	30.091	41.7591	52.8034	60.2065	2.3963	3.36761	0.000393673	0.000970037	0.0216375	0.0190974	cytokine receptor-like factor 1
XM_005682176.1	TMEM59L	78.8555	60.5388	71.4283	10.9415	12.3351	15.4078	7.27949	7.52283	10.7603	-2.44621	-3.04392	0.000470264	0.000342391	0.0228936	0.0124319	transmembrane protein 59-like
XM_005682172.1	CERS1	20.8414	16.5748	16.6703	-	-	-	5.07496	6.84536	4.9802	-	-1.6782	-	0.00126739	-	0.0212059	ceramide synthase 1
XM_005682152.1	LOC102181858	0.0888987	0.127933	0.0774028	2.53847	3.63116	3.38682	-	-	-	5.02144	-	0.000739349	-	0.0263713	-	leukotriene-B%284%29 omega-hydroxylase 1-like
XM_005682129.1	BABAM1	2.03876	1.5143	1.83238	0.572931	0.472318	0.563747	-	-	-	-1.74291	-	0.00127753	-	0.0309825	-	BRISC and BRCA1 A complex member 1%2C transcript variant X3
XM_005682121.1	PLVAP	97.271	91.1958	119.162	183.252	227.932	211.892	-	-	-	1.01822	-	0.00251586	-	0.0401479	-	plasmalemma vesicle associated protein
XM_005682098.1	SUGP2	1.80194	1.25899	1.75083	-	-	-	0.451378	0.711388	0.606196	-	-1.44366	-	0.00580429	-	0.0421622	SURP and G patch domain containing 2%2C transcript variant X2
XM_005682079.1	GMIP	17.3148	13.0715	13.9883	7.28095	7.00744	7.73197	-	-	-	-1.0109	-	0.00466912	-	0.0497727	-	GEM interacting protein
XM_005682071.1	GUK1	1.96691	2.08567	1.89283	-	-	-	0.795238	0.902393	0.436908	-	-1.47785	-	0.00110787	-	0.0199042	guanylate kinase 1%2C transcript variant X4
XM_005682008.1	FGFR3	10.2664	5.64896	11.4245	-	-	-	22.932	23.3301	19.7335	-	1.27137	-	0.00357295	-	0.0333237	fibroblast growth factor receptor 3
XM_005682006.1	WHSC1	38.7285	34.4738	41.8378	-	-	-	16.5252	17.4015	15.7706	-	-1.2109	-	0.000569699	-	0.0152335	Wolf-Hirschhorn syndrome candidate 1
XM_005681996.1	GRK4	4.30597	4.83339	3.71165	1.41711	1.62353	1.88653	1.07503	1.68907	1.27212	-1.38305	-1.6708	0.00167571	0.00137755	0.0339143	0.0218618	G protein-coupled receptor kinase 4
XM_005681980.1	AFAP1	15.3112	16.665	13.3594	-	-	-	5.39705	8.83445	5.61223	-	-1.19196	-	0.00443205	-	0.0368204	actin filament associated protein 1
XM_005681970.1	BST1	0.67639	1.84247	0.967516	-	-	-	6.30935	10.8445	10.5691	-	2.99128	-	0.00587375	-	0.0424176	bone marrow stromal cell antigen 1
XM_005681961.1	MSX1	2.6081	2.69767	2.12891	53.8039	88.2391	85.5446	60.8879	43.5157	56.0689	4.93601	4.43191	0.00267562	0.000596745	0.0409149	0.0155139	msh homeobox 1
XM_005681960.1	STK32B	4.40731	5.20283	4.07722	0.933204	0.185462	0.459122	0.132252	0.0750359	0.629717	-3.11687	-4.03147	0.000538035	0.000344492	0.0240034	0.0124319	serine%2Fthreonine kinase 32B
XM_005681958.1	CDS1	1.02606	0.808608	0.893376	7.3779	8.37772	6.56159	-	-	-	3.03222	-	0.000247463	-	0.0197013	-	CDP-diacylglycerol synthase %28phosphatidate cytidylyltransferase%29 1
XM_005681956.1	HPSE	0.973031	0.855723	0.800137	-	-	-	0.103815	0.353412	0.190122	-	-2.02184	-	0.00177282	-	0.0243826	heparanase
XM_005681953.1	BMP3	0.430987	0.775284	0.625424	2.78117	4.12698	3.89964	-	-	-	2.56082	-	0.00219723	-	0.0380096	-	bone morphogenetic protein 3
XM_005681913.1	FGFBP1	8.60313	6.133	11.8602	-	-	-	47.1184	47.3047	42.6969	-	2.36614	-	8e-05	-	0.00822712	fibroblast growth factor binding protein 1
XM_005681902.1	CPEB2	1.21061	2.52086	1.3575	6.14313	6.38896	8.28083	6.7106	7.97458	7.05757	2.03203	2.09509	0.00270803	0.00058252	0.0409149	0.0153459	cytoplasmic polyadenylation element binding protein 2
XM_005681894.1	CYTL1	36.1931	24.7775	28.6316	5.10484	2.69212	1.87132	2.38312	2.25353	4.29159	-3.2122	-3.32709	0.00158162	0.00140892	0.033494	0.0221858	cytokine-like 1
XM_005681875.1	AFF1	3.52263	4.8521	3.56368	10.4241	9.14563	8.90428	-	-	-	1.25403	-	0.00101443	-	0.0294717	-	AF4%2FFMR2 family%2C member 1
XM_005681858.1	ARHGAP24	0.840998	1.28288	1.05443	-	-	-	0.161511	0.403202	0.212964	-	-2.03102	-	0.00556302	-	0.0414642	Rho GTPase activating protein 24%2C transcript variant X4
XM_005681853.1	AGPAT9	7.7874	9.21232	9.48104	4.53548	2.90299	1.88568	3.10516	3.8112	3.80656	-1.5059	-1.30425	0.0035996	0.000799524	0.0450918	0.0175466	1-acylglycerol-3-phosphate O-acyltransferase 9
XM_005681847.1	LOC102178994	7.78757	8.58034	7.52215	0.824469	1.09235	0.34768	-	-	-	-3.39915	-	4.81e-05	-	0.013579	-	placenta-specific gene 8 protein-like
XM_005681807.1	FRAS1	12.7144	9.93519	7.89493	-	-	-	1.57106	2.65747	0.903482	-	-2.57332	-	0.00469509	-	0.0379139	Fraser syndrome 1
XM_005681708.1	NOA1	8.91907	8.15042	8.61994	-	-	-	16.4865	16.5699	20.4525	-	1.0586	-	0.00220814	-	0.0269732	nitric oxide associated 1
XM_005681704.1	KIAA1211	2.86512	4.3775	4.0821	0.864406	0.48435	0.372115	0.607404	0.79061	0.615075	-2.71827	-2.49199	0.00275492	0.00265337	0.0409262	0.0289704	KIAA1211 ortholog
XM_005681678.1	SOD3	5.32297	2.45126	3.21334	-	-	-	10.6315	11.4454	14.3778	-	1.73023	-	0.00399036	-	0.0350399	superoxide dismutase 3%2C extracellular
XM_005681671.1	LAP3	10.7682	21.5189	16.5815	98.8146	140.02	168.351	111.301	147.408	172.591	3.05871	3.14172	0.0042657	0.0021228	0.0483633	0.0264143	leucine aminopeptidase 3
XM_005681640.1	HOPX	0.246518	0.798211	1.93176	19.3281	27.4416	31.2862	32.3116	44.9924	32.5131	4.71282	5.20535	0.0021558	0.00108272	0.0379278	0.0197486	HOP homeobox%2C transcript variant X1
XM_005681551.1	UCHL1	41.7152	31.0992	43.3382	5.74384	5.48607	4.13338	3.74199	1.35107	2.42966	-2.91846	-3.94862	0.000969273	0.000748301	0.0292814	0.0172438	ubiquitin carboxyl-terminal esterase L1 %28ubiquitin thiolesterase%29%2C transcript variant X1
XM_005681450.1	SPP1	505.621	846.203	527.07	-	-	-	74.4088	67.5781	67.2841	-	-3.16644	-	0.00721837	-	0.0473599	secreted phosphoprotein 1
XM_005681446.1	ABCG2	1.57049	2.18122	1.6854	0.353525	0.524596	0.313072	0.315635	0.676535	0.359668	-2.19043	-2.00792	0.0020375	0.0034148	0.0376415	0.0329318	ATP-binding cassette%2C sub-family G %28WHITE%29%2C member 2%2C transcript variant X1
XM_005681428.1	SNCA	2.47527	2.22633	2.00124	0.855695	0.158721	0.505187	0.509322	0.385301	0.559649	-2.14108	-2.20448	0.00207895	0.00028075	0.0378264	0.0117023	synuclein%2C alpha %28non A4 component of amyloid precursor%29%2C transcript variant X1
XM_005681425.1	CCSER1	1.02289	1.31102	1.22459	0.278468	0.0286957	0.12178	0.184165	0.17415	0.112423	-3.05241	-2.91827	0.00074569	0.00030918	0.0264665	0.0122053	coiled-coil serine-rich protein 1
XM_005681395.1	TSPAN5	20.7229	19.8051	21.2809	10.0601	11.3845	9.20263	-	-	-	-1.01205	-	0.000171833	-	0.0174374	-	tetraspanin 5
XM_005681389.1	SLC39A8	1.13421	1.75587	1.82545	11.5441	13.977	10.3116	-	-	-	2.92579	-	0.000702911	-	0.0259612	-	solute carrier family 39 %28zinc transporter%29%2C member 8
XM_005681381.1	TRMT10A	0.348105	0.350667	0.363708	-	-	-	0.133705	0.151721	0.146916	-	-1.29719	-	8.38e-06	-	0.00369288	tRNA methyltransferase 10 homolog A %28S. cerevisiae%29%2C transcript variant X2
XM_005681332.1	LOC102188389	2.07139	0.541982	1.53027	9.0529	9.18489	13.272	9.58343	7.04465	12.1419	2.92683	2.7956	0.00330723	0.00593704	0.0438233	0.0426456	DENN domain-containing protein 1C-like
XM_005681319.1	COL25A1	8.48426	9.72244	9.34139	0.347614	0.402987	0.171021	-	-	-	-4.90163	-	1.84e-05	-	0.0108542	-	collagen%2C type XXV%2C alpha 1
XM_005681278.1	NDST3	0.8041	1.20003	0.907561	-	-	-	0.0571943	0.227154	0.125691	-	-2.82802	-	0.00290128	-	0.0303666	N-deacetylase%2FN-sulfotransferase %28heparan glucosaminyl%29 3
XM_005681267.1	PDE5A	0.190256	0.219035	0.231914	-	-	-	0.036538	0.0414613	0.0401483	-	-2.4402	-	0.000148555	-	0.00956479	phosphodiesterase 5A%2C cGMP-specific%2C transcript variant X1
XM_005681243.1	PANX2	0.823303	1.26943	1.63849	-	-	-	7.00213	5.89515	7.69401	-	2.46431	-	0.000611694	-	0.0156274	pannexin 2
XM_005681226.1	ATXN10	173.623	166.885	158.455	-	-	-	58.9114	81.5295	63.0766	-	-1.29378	-	0.000278046	-	0.0117023	ataxin 10
XM_005681219.1	KIAA0930	9.10079	6.96639	9.73029	-	-	-	26.2565	22.6962	20.236	-	1.42331	-	0.00172064	-	0.0240201	KIAA0930 ortholog
XM_005681217.1	FAM118A	1.73162	1.5723	1.22051	-	-	-	0.316715	0.539087	0.580017	-	-1.65586	-	0.00389382	-	0.0345976	family with sequence similarity 118%2C member A%2C transcript variant X1
XM_005681207.1	ARHGAP8	0.935361	0.403819	0.814406	-	-	-	6.04765	6.25102	10.0007	-	3.37219	-	0.00658419	-	0.0451995	Rho GTPase activating protein 8
XM_005681198.1	TSPO	34.4556	23.8077	41.9133	-	-	-	78.2344	72.5118	72.4467	-	1.15575	-	0.00184212	-	0.0246986	translocator protein %2818kDa%29
XM_005681191.1	TNFRSF13C	12.9112	10.6405	14.1174	1.0899	2.69549	1.4299	0.504562	0.245378	0.105603	-2.85256	-5.4604	0.000665788	0.000279969	0.025516	0.0117023	tumor necrosis factor receptor superfamily%2C member 13C
XM_005681186.1	ZC3H7B	38.8928	34.7881	44.6888	-	-	-	15.3974	18.6042	11.133	-	-1.39099	-	0.00245841	-	0.0280067	zinc finger CCCH-type containing 7B
XM_005681175.1	CBX7	1.15972	0.649031	1.06585	-	-	-	6.37228	7.37133	5.16647	-	2.71772	-	0.00123787	-	0.0210854	chromobox homolog 7
XM_005681167.1	MAFF	5.1971	5.34219	3.44765	-	-	-	14.0207	17.2583	13.9264	-	1.69242	-	0.00114817	-	0.0202387	v-maf avian musculoaponeurotic fibrosarcoma oncogene homolog F
XM_005681166.1	PLA2G6	6.27407	7.21804	8.70336	-	-	-	2.92719	3.7851	3.3411	-	-1.14258	-	0.00568343	-	0.0417119	phospholipase A2%2C group VI %28cytosolic%2C calcium-independent%29
XM_005681163.1	MICALL1	24.2953	16.0069	20.4053	-	-	-	45.8331	47.2906	38.8526	-	1.12033	-	0.00255935	-	0.0284453	MICAL-like 1
XM_005681126.1	FAM109B	86.839	64.5572	93.7218	28.1756	27.2395	22.1293	14.4784	18.3862	19.2909	-1.66038	-2.23259	0.00342852	0.00196479	0.0440982	0.0254926	family with sequence similarity 109%2C member B
XM_005681124.1	2015-09-03	13.6331	13.5957	11.8701	1.54341	2.29027	2.42987	0.535885	1.12932	0.897274	-2.64207	-3.93152	7e-05	3.63e-05	0.0145856	0.00612905	septin 3
XM_005681120.1	MEI1	2.53229	3.43791	1.68482	-	-	-	0.0688187	0.0520611	0.0672166	-	-5.34686	-	0.00794618	-	0.0497189	meiosis inhibitor 1
XM_005681082.1	SUN2	1.11775	0.611941	1.03668	-	-	-	2.91657	2.51527	1.99977	-	1.42568	-	0.00725564	-	0.0474732	Sad1 and UNC84 domain containing 2%2C transcript variant X1
XM_005681060.1	GCAT	3.69607	1.57765	2.67267	29.0454	32.5053	46.8375	25.9865	29.8976	24.0155	3.76976	3.32982	0.0036345	0.000197187	0.0451863	0.0107482	glycine C-acetyltransferase
XM_005681049.1	ATP6V1E1	0.689267	0.309973	0.600135	2.16833	2.08834	1.72327	1.73738	2.06536	1.69693	1.90262	1.78183	0.00121712	0.00135354	0.0308781	0.0217072	ATPase%2C H%2B transporting%2C lysosomal 31kDa%2C V1 subunit E1%2C transcript variant X4
XM_005681042.1	ADIPOR2	20.8923	17.7824	18.061	-	-	-	45.46	40.2843	43.0054	-	1.18224	-	0.000180721	-	0.0103278	adiponectin receptor 2
XM_005681040.1	B4GALNT3	1.57037	1.56735	2.18327	-	-	-	23.8106	19.5949	17.9054	-	3.52638	-	0.00045539	-	0.0138389	beta-1%2C4-N-acetyl-galactosaminyl transferase 3
XM_005681034.1	NRIP2	2.89376	3.25907	2.48304	-	-	-	0.724874	1.23382	0.678499	-	-1.71134	-	0.00220665	-	0.0269732	nuclear receptor interacting protein 2
XM_005681033.1	FOXM1	20.0426	15.6437	22.4421	-	-	-	5.09683	6.06121	6.95949	-	-1.68186	-	0.00294339	-	0.0305371	forkhead box M1
XM_005681030.1	TSPAN9	130.573	106.809	105.448	38.0476	42.0493	31.6426	29.7687	30.5177	21.6709	-1.61735	-2.06455	0.000899546	0.000547076	0.0285374	0.0148825	tetraspanin 9
XM_005681024.1	KCNA6	20.0549	15.4347	15.3284	6.81081	3.81042	3.58144	2.2704	2.6384	1.74331	-1.83918	-2.93345	0.00286605	0.000737622	0.041569	0.0171934	potassium voltage-gated channel%2C shaker-related subfamily%2C member 6
XM_005681020.1	CD9	104.189	75.1386	109.821	208.27	258.063	284.694	341.822	339.718	378.651	1.37706	1.87444	0.00344643	0.000101369	0.0442236	0.00880351	CD9 molecule
XM_005681018.1	SCNN1A	1.13065	0.434827	1.68033	-	-	-	6.73873	6.96703	7.7611	-	2.72546	-	0.000216026	-	0.0110503	sodium channel%2C non-voltage-gated 1 alpha subunit
XM_005681013.1	LAG3	3.06557	4.01056	2.4265	-	-	-	0.802817	0.668062	0.98016	-	-1.95493	-	0.00742291	-	0.0480865	lymphocyte-activation gene 3
XM_005681001.1	NINJ2	3.17612	2.52591	3.34759	-	-	-	10.0323	16.302	12.6404	-	2.10661	-	0.00556386	-	0.0414642	ninjurin 2
XM_005680992.1	RHNO1	9.98671	8.14702	8.36298	-	-	-	2.38212	3.74276	4.07167	-	-1.37773	-	0.00220614	-	0.0269732	RAD9-HUS1-RAD1 interacting nuclear orphan 1%2C transcript variant X1
XM_005680991.1	LOC102182287	9.65289	11.1825	12.1447	-	-	-	4.58817	5.89007	3.32707	-	-1.25637	-	0.00350808	-	0.033125	histone-binding protein RBBP4-like
XM_005680985.1	CCND2	126.138	170.333	131.666	51.5169	56.3208	46.676	41.492	67.4746	52.4969	-1.47034	-1.40686	0.00300321	0.00492052	0.0423616	0.0387399	cyclin D2
XM_005680976.1	PLEKHG6	0.738118	0.0531107	1.44601	-	-	-	5.06767	4.02134	4.43915	-	2.59618	-	0.00172065	-	0.0240201	pleckstrin homology domain containing%2C family G %28with RhoGef domain%29 member 6
XM_005680969.1	NCAPD2	37.4094	32.5644	38.3535	11.9344	19.5422	16.9352	15.8267	15.3281	14.3087	-1.16197	-1.25262	0.00222124	0.000344851	0.0382199	0.0124319	non-SMC condensin I complex%2C subunit D2
XM_005680939.1	GNB3	6.95138	9.31259	7.20722	-	-	-	1.75657	2.34207	1.89796	-	-1.96867	-	0.00162557	-	0.0234533	guanine nucleotide binding protein %28G protein%29%2C beta polypeptide 3
XM_005680938.1	CDCA3	49.9951	43.5915	59.552	-	-	-	26.7064	16.2054	25.2375	-	-1.16807	-	0.00756461	-	0.0484912	cell division cycle associated 3
XM_005680937.1	SPSB2	2.02983	1.7261	3.13301	-	-	-	6.64468	4.82561	6.74959	-	1.40316	-	0.00754099	-	0.0484236	splA%2Fryanodine receptor domain and SOCS box containing 2%2C transcript variant X4
XM_005680926.1	PTPN6	10.9555	8.52459	8.20781	-	-	-	20.7543	25.2165	29.1223	-	1.43942	-	0.0035415	-	0.0332605	protein tyrosine phosphatase%2C non-receptor type 6
XM_005680925.1	LPCAT3	20.9928	16.0909	21.6177	-	-	-	78.0013	55.8235	67.4973	-	1.77804	-	0.00201335	-	0.0258144	lysophosphatidylcholine acyltransferase 3
XM_005680905.1	PHC1	39.4045	28.8281	37.7087	12.3768	13.3547	11.0784	10.2977	10.0673	6.67309	-1.5251	-1.9702	0.0023278	0.0016472	0.0390951	0.0236755	polyhomeotic homolog 1 %28Drosophila%29
XM_005680901.1	CLEC4A	0.171127	0.164178	0.198664	-	-	-	1.53367	1.86464	1.40435	-	3.169	-	0.000491638	-	0.0140999	C-type lectin domain family 4%2C member A
XM_005680897.1	SLC2A3	27.8329	26.5151	21.4891	-	-	-	7.7433	13.393	8.73187	-	-1.34429	-	0.00415716	-	0.0357713	solute carrier family 2 %28facilitated glucose transporter%29%2C member 3
XM_005680784.1	KCNJ8	41.6318	41.1547	31.1725	-	-	-	17.0572	19.835	16.8665	-	-1.08394	-	0.00478683	-	0.0383054	potassium inwardly-rectifying channel%2C subfamily J%2C member 8
XM_005680776.1	BHLHE41	1.45254	1.64614	1.58089	5.37793	4.14011	3.80451	-	-	-	1.50942	-	0.00393176	-	0.0469524	-	basic helix-loop-helix family%2C member e41
XM_005680769.1	PKP2	1.73956	1.14284	1.44875	-	-	-	3.26813	4.409	4.33587	-	1.47177	-	0.00325984	-	0.0321197	plakophilin 2
XM_005680768.1	LOC102180290	9.81643	10.8767	8.86164	3.6142	4.00071	4.01514	2.4288	3.87163	3.26186	-1.34553	-1.62796	0.000558716	0.000743967	0.0241051	0.0171998	putative ubiquitin carboxyl-terminal hydrolase 41-like
XM_005680762.1	KCTD17	9.915	7.13426	4.82854	-	-	-	29.0462	20.2338	24.942	-	1.76238	-	0.00404151	-	0.0353004	potassium channel tetramerization domain containing 17
XM_005680732.1	TM7SF3	0.63816	1.10969	0.648243	1.93034	1.86188	1.87407	-	-	-	1.24172	-	0.00225733	-	0.0384967	-	transmembrane 7 superfamily member 3%2C transcript variant X1
XM_005680707.1	FAR2	0.87429	1.56319	2.07609	27.1064	47.8292	36.4624	40.3989	73.7289	45.397	4.62531	5.14337	0.00403707	0.00761817	0.0475213	0.0486091	fatty acyl CoA reductase 2
XM_005680677.1	CYTH4	5.4873	5.14152	5.11897	1.31327	1.89463	1.09121	-	-	-	-1.87304	-	0.000140328	-	0.0166985	-	cytohesin 4
XM_005680669.1	CSF2RB	0.268961	0.0430063	0.10408	-	-	-	1.06176	1.33507	0.903905	-	2.98797	-	0.00253998	-	0.0283215	colony stimulating factor 2 receptor%2C beta%2C low-affinity %28granulocyte-macrophage%29%2C transcript variant X1
XM_005680651.1	LOC102168239	1.84163	2.25952	1.43902	4.36511	4.45108	4.81235	4.12625	4.03908	3.22194	1.29863	1.03942	0.000595235	0.00639835	0.0246388	0.0445152	ankyrin repeat and BTB%2FPOZ domain-containing protein BTBD11-like
XM_005680648.1	CKAP4	221.688	210.033	202.599	62.4486	75.2377	52.1277	37.7967	67.2861	70.8523	-1.74062	-1.85017	6.94e-05	0.000209094	0.0145856	0.0109203	cytoskeleton-associated protein 4
XM_005680608.1	RBFOX2	0.723105	0.730428	0.799104	0.269205	0.274638	0.264889	0.18694	0.21213	0.156504	-1.47788	-2.01956	3.88e-05	4.11e-05	0.0126402	0.00638657	RNA binding protein%2C fox-1 homolog %28C. elegans%29 2%2C transcript variant X3
XM_005680597.1	TOM1	0.25535	0.061245	0.222329	-	-	-	2.16589	3.15332	3.0834	-	3.96268	-	0.00126459	-	0.0212059	target of myb1 %28chicken%29%2C transcript variant X1
XM_005680573.1	TCP11L2	0.983267	2.21094	1.34838	-	-	-	4.24874	3.88378	5.08355	-	1.54071	-	0.0047243	-	0.038063	t-complex 11%2C testis-specific-like 2%2C transcript variant X2
XM_005680564.1	TXNRD1	0.767674	0.914274	0.852789	-	-	-	1.70306	1.96138	1.41514	-	1.00288	-	0.00655282	-	0.045059	thioredoxin reductase 1%2C transcript variant X8
XM_005680541.1	STAB2	1.35912	1.09597	1.02014	0.011341	0.0315543	0.0223185	-	-	-	-5.73578	-	0.00038157	-	0.0216375	-	stabilin 2
XM_005680429.1	IKZF4	5.89319	7.81734	5.27074	-	-	-	1.23186	1.87835	1.53687	-	-2.03018	-	0.00375108	-	0.0341198	IKAROS family zinc finger 4 %28Eos%29
XM_005680423.1	LRP1	191.878	174.685	186.498	115.324	85.7736	70.5671	-	-	-	-1.02561	-	0.00264209	-	0.0406636	-	low density lipoprotein receptor-related protein 1
XM_005680418.1	PIP4K2C	7.96117	6.76799	6.93167	-	-	-	22.0843	22.0079	20.2013	-	1.56959	-	3.88e-05	-	0.00625924	phosphatidylinositol-5-phosphate 4-kinase%2C type II%2C gamma
XM_005680413.1	PPM1H	2.7274	2.26911	1.74392	-	-	-	5.72892	6.64018	6.65472	-	1.49689	-	0.000607206	-	0.0156166	protein phosphatase%2C Mg2%2B%2FMn2%2B dependent%2C 1H
XM_005680394.1	GDF11	9.91783	12.8	11.5137	5.18095	4.1455	5.34779	2.72098	5.08885	2.32543	-1.22204	-1.75594	0.00204751	0.0025893	0.0377296	0.0285568	growth differentiation factor 11
XM_005680389.1	LOC102177414	58.8626	48.8679	49.5189	29.7063	21.2097	18.4814	20.3869	17.1624	19.6172	-1.1801	-1.45981	0.00331166	0.000585613	0.0438233	0.0153691	transmembrane protein 198-like
XM_005680388.1	MMP19	62.1096	44.3918	64.0549	14.2663	8.68405	7.23627	14.2721	15.1999	9.84159	-2.49827	-2.11715	0.002105	0.0024957	0.037851	0.0281153	matrix metallopeptidase 19
XM_005680343.1	TIMELESS	20.2137	15.0133	19.9817	-	-	-	6.6715	8.77699	6.46019	-	-1.33339	-	0.00388524	-	0.0345647	timeless circadian clock
XM_005680309.1	NAB2	27.4115	22.3022	27.3921	54.6428	67.0133	78.1015	62.7871	51.7241	56.5351	1.37334	1.14947	0.0042517	0.000988528	0.0483633	0.0192804	NGFI-A binding protein 2 %28EGR1 binding protein 2%29
XM_005680298.1	R3HDM2	0.538152	0.422425	0.425965	-	-	-	0.140932	0.106615	0.137651	-	-1.84782	-	0.00107875	-	0.0197486	R3H domain containing 2%2C transcript variant X10
XM_005680277.1	ARHGEF25	8.31376	5.67533	8.38944	-	-	-	0.859724	1.30076	1.58945	-	-2.57718	-	0.00248408	-	0.0280067	Rho guanine nucleotide exchange factor %28GEF%29 25%2C transcript variant X1
XM_005680266.1	CDK4	195.262	147.931	201.118	-	-	-	81.7727	94.136	80.6915	-	-1.08491	-	0.00526734	-	0.0402733	cyclin-dependent kinase 4
XM_005680240.1	TBC1D30	2.07927	1.34896	1.63232	-	-	-	4.22228	3.37985	4.29182	-	1.23286	-	0.00326138	-	0.0321197	TBC1 domain family%2C member 30
XM_005680217.1	WIF1	0.197163	0.0709337	0.257501	4.48485	7.34536	6.61944	-	-	-	5.13349	-	0.00225744	-	0.0384967	-	WNT inhibitory factor 1%2C transcript variant X1
XM_005680195.1	CPM	0.929249	1.66343	0.927486	4.05858	4.45586	3.58338	-	-	-	1.78103	-	0.00124426	-	0.0309825	-	carboxypeptidase M
XM_005680171.1	KIF21A	1.37438	2.08896	1.27732	4.20026	4.58863	3.5152	-	-	-	1.37598	-	0.00338835	-	0.0439084	-	kinesin family member 21A
XM_005680137.1	HDAC7	61.4002	54.0766	53.8218	-	-	-	22.7262	32.9707	25.9392	-	-1.05229	-	0.00172155	-	0.0240201	histone deacetylase 7
XM_005680136.1	VDR	4.95618	3.736	5.70803	85.6669	108.218	110.169	159.014	189.327	158.651	4.40016	5.1378	0.000255205	8.65e-05	0.0197715	0.00832892	vitamin D %281%2C25- dihydroxyvitamin D3%29 receptor
XM_005680101.1	KRT80	4.81881	1.30288	4.98394	125.232	158.224	174.906	147.901	125.221	166.07	5.36712	5.30549	0.000524407	0.000275123	0.0236887	0.0117023	keratin 80
XM_005680098.1	LOC102183488	0.487347	1.052	5.51624	3933.75	6415.49	6974.58	6466.84	3812.22	4888.74	11.2617	11.07	0.00348918	0.00279992	0.0444968	0.029821	keratin%2C type II cuticular Hb1-like
XM_005680097.1	LOC102183211	0.471626	0.848388	3.21667	1949.61	2912.9	3530.14	3189.2	2152.44	3182.28	10.8533	10.8757	0.00369886	0.00118035	0.0455775	0.0206009	keratin%2C type II cuticular Hb1-like
XM_005680096.1	KRT84	0.449859	0.0539488	0.489607	100.079	181.495	167.493	-	-	-	8.82032	-	0.0040211	-	0.0475213	-	keratin 84
XM_005680093.1	KRT79	0.747029	0.191971	1.34731	-	-	-	157.042	172.389	206.058	-	7.87169	-	0.000252977	-	0.0114528	keratin 79
XM_005680089.1	SPRYD3	22.1937	18.0362	21.5866	-	-	-	39.4699	45.0491	43.6826	-	1.05235	-	0.000477127	-	0.0139735	SPRY domain containing 3
XM_005680084.1	HOXC13	0.0975695	0.0702054	0.467238	118.573	188.449	212.807	161.333	112.055	151.675	9.67704	9.38668	0.00359289	0.000718629	0.0450596	0.0170282	homeobox C13
XM_005680080.1	HOXC8	29.4822	33.981	41.5236	9.89997	11.6857	8.37602	7.10535	9.66688	10.5189	-1.80902	-1.9437	0.00235271	0.00210409	0.0392837	0.0263188	homeobox C8
XM_005680079.1	ZNF385A	14.7346	10.4115	11.7216	-	-	-	70.2851	46.2017	47.6466	-	2.15444	-	0.00581438	-	0.0421922	zinc finger protein 385A
XM_005680078.1	ITGA5	110.033	94.3528	100.046	45.7743	49.491	37.2712	47.8896	39.9236	37.5197	-1.19973	-1.28035	0.000604151	0.000423995	0.0246623	0.013353	integrin%2C alpha 5 %28fibronectin receptor%2C alpha polypeptide%29
XM_005680072.1	BTG1	49.7051	65.2303	52.4986	-	-	-	131.728	119.474	132.85	-	1.19771	-	0.000355384	-	0.0125649	B-cell translocation gene 1%2C anti-proliferative
XM_005680035.1	ENDOU	0.159317	0.0573177	0.0693576	1.04093	1.6805	1.6312	-	-	-	3.92784	-	0.00286067	-	0.041569	-	endonuclease%2C polyU-specific%2C transcript variant X1
XM_005680034.1	SLC48A1	12.839	7.72729	9.24597	-	-	-	43.38	34.1243	32.495	-	1.88352	-	0.00197337	-	0.0255459	solute carrier family 48 %28heme transporter%29%2C member 1
XM_005680011.1	FKBP11	0.415444	0.523126	0.452151	-	-	-	0.0997307	0.113169	0.21917	-	-1.6865	-	0.00290971	-	0.0303666	FK506 binding protein 11%2C 19 kDa%2C transcript variant X3
XM_005679989.1	FMNL3	0.0962519	0.138515	0.11174	-	-	-	0.338889	0.419512	0.338523	-	1.66251	-	0.00107835	-	0.0197486	formin-like 3%2C transcript variant X5
XM_005679978.1	RACGAP1	2.35567	1.87343	2.05105	0.870068	0.834759	0.797078	-	-	-	-1.32777	-	0.00090188	-	0.0285374	-	Rac GTPase activating protein 1%2C transcript variant X1
XM_005679951.1	SMAGP	16.43	12.3147	18.2068	-	-	-	41.7125	38.1784	37.8668	-	1.32658	-	0.000381989	-	0.0128588	small cell adhesion glycoprotein
XM_005679948.1	GALNT6	0.63729	0.275134	0.488294	-	-	-	2.49674	2.66651	2.34897	-	2.42307	-	0.000127908	-	0.00936659	UDP-N-acetyl-alpha-D-galactosamine:polypeptide N-acetylgalactosaminyltransferase 6 %28GalNAc-T6%29
XM_005679942.1	LOC102185436	1.50024	1.97286	6.75642	-	-	-	7004.77	3822.6	7327.14	-	10.7934	-	0.00566148	-	0.0416675	keratin%2C type II microfibrillar%2C component 7C-like
XM_005679937.1	LOC102184223	0.349528	0.167667	0.676286	595.943	900.26	1023.34	939.535	588.502	851.636	11.0438	10.9614	0.00271744	0.00167577	0.0409149	0.0238443	keratin%2C type II microfibrillar%2C component 5-like%2C transcript variant X1
XM_005679935.1	KRT82	0.0660179	0.0475027	0.172442	88.4726	120.16	163.231	79.6844	65.1366	67.8453	10.3447	9.53855	0.00463059	9.26e-05	0.0496849	0.00867593	keratin 82%2C transcript variant X1
XM_005679931.1	KRT8	41.1138	8.71884	25.3852	-	-	-	98.3669	116.983	113.037	-	2.12625	-	0.00151707	-	0.0228294	keratin 8
XM_005679911.1	ESPL1	13.0681	11.2025	13.5934	3.59609	5.80083	5.53485	4.7473	4.14261	3.68095	-1.34244	-1.59074	0.00160055	0.000433238	0.033494	0.0134942	extra spindle pole bodies homolog 1 %28S. cerevisiae%29
XM_005679870.1	ATP5G2	3.32476	3.3891	2.65359	-	-	-	0.931159	0.905682	1.26678	-	-1.5937	-	0.00135106	-	0.0217072	ATP synthase%2C H%2B transporting%2C mitochondrial Fo complex%2C subunit C2 %28subunit 9%29%2C transcript variant X2
XM_005679864.1	HOXC5	10.5369	7.00408	10.1354	-	-	-	1.73449	1.74952	2.75294	-	-2.14975	-	0.00359599	-	0.0334179	homeobox C5
XM_005679856.1	CBX5	0.223356	0.206633	0.14817	0.0205903	0.0381925	0.0202602	-	-	-	-2.87076	-	0.00211756	-	0.0379278	-	chromobox homolog 5%2C transcript variant X4
XM_005679849.1	HNRNPA1	13.4508	17.0424	16.7185	5.84944	6.56249	3.52767	3.93092	7.43433	5.55344	-1.56653	-1.48053	0.00207776	0.00272985	0.0378264	0.0294201	heterogeneous nuclear ribonucleoprotein A1%2C transcript variant X1
XM_005679822.1	CRADD	3.01828	3.661	4.12967	7.51257	7.35452	7.96709	-	-	-	1.07897	-	0.000415337	-	0.022363	-	CASP2 and RIPK1 domain containing adaptor with death domain
XM_005679772.1	METTL25	0.299002	0.430289	0.433894	-	-	-	0.0957038	0.108599	0.0701069	-	-2.08367	-	0.00294121	-	0.0305369	methyltransferase like 25%2C transcript variant X1
XM_005679758.1	PAWR	1.48068	3.53523	2.34401	9.38113	10.0901	7.62819	-	-	-	1.8805	-	0.00222264	-	0.0382199	-	PRKC%2C apoptosis%2C WT1%2C regulator
XM_005679757.1	E2F7	4.26993	4.33976	3.4157	1.05911	1.50932	1.90633	-	-	-	-1.4262	-	0.0028263	-	0.0414011	-	E2F transcription factor 7
XM_005679747.1	SYT1	0.700765	0.813274	0.669192	0.284451	0.243518	0.430603	0.0868255	0.19705	0.159008	-1.18751	-2.30147	0.00469354	0.000437224	0.0498408	0.0135587	synaptotagmin I
XM_005679703.1	NCAPG2	11.4189	15.5198	13.4729	4.88833	6.25327	5.89991	-	-	-	-1.24571	-	0.00340201	-	0.043943	-	non-SMC condensin II complex%2C subunit G2
XM_005679698.1	RNF32	0.174212	0.313383	0.151684	-	-	-	0.752779	0.569475	0.857797	-	1.76985	-	0.00639678	-	0.0445152	ring finger protein 32
XM_005679677.1	KCNH2	11.8682	11.9972	9.24974	2.57777	3.61207	2.78458	2.16807	1.70322	1.18097	-1.8836	-2.71249	0.00106142	0.000571327	0.0297408	0.0152483	potassium voltage-gated channel%2C subfamily H %28eag-related%29%2C member 2
XM_005679673.1	DPP6	16.5244	13.4798	9.94643	-	-	-	4.04017	3.35518	3.07532	-	-1.93186	-	0.0069226	-	0.0464963	dipeptidyl-peptidase 6
XM_005679664.1	PRKAG2	0.607136	0.551823	0.639914	-	-	-	1.22735	1.21864	1.21376	-	1.02465	-	1.83e-05	-	0.00452622	protein kinase%2C AMP-activated%2C gamma 2 non-catalytic subunit%2C transcript variant X1
XM_005679663.1	WDR86	2.9839	1.95186	3.3066	5.42646	6.41264	5.94232	-	-	-	1.10924	-	0.00308825	-	0.0429915	-	WD repeat domain 86
XM_005679651.1	LOC102170666	19.6277	16.6257	22.3895	-	-	-	6.79929	10.1519	6.81576	-	-1.303	-	0.00438528	-	0.0366797	uncharacterized LOC102170666
XM_005679649.1	SSPO	0.935186	0.646203	0.659157	-	-	-	0.0997774	0.226444	0.0939741	-	-2.41472	-	0.00425289	-	0.0361882	SCO-spondin
XM_005679637.1	PDIA4	287.167	225.103	253.281	103.839	138.869	122.945	86.0754	133.225	98.8628	-1.06603	-1.26673	0.00293968	0.00282626	0.0419611	0.0299132	protein disulfide isomerase family A%2C member 4
XM_005679635.1	CNTNAP2	0.993577	0.897155	0.932944	-	-	-	0.0561215	0.275962	0.260371	-	-2.2528	-	0.000617626	-	0.0157428	contactin associated protein-like 2
XM_005679633.1	ARHGEF5	8.6625	3.03795	6.46484	-	-	-	22.6823	17.3905	20.1232	-	1.72848	-	0.00332643	-	0.0324175	Rho guanine nucleotide exchange factor %28GEF%29 5
XM_005679623.1	FAM131B	9.42283	9.11596	5.20274	-	-	-	1.04826	1.25211	1.17204	-	-2.7734	-	0.00765756	-	0.0486432	family with sequence similarity 131%2C member B
XM_005679617.1	LOC102182098	5.33066	4.62921	7.84224	16.547	16.0064	19.258	-	-	-	1.54122	-	0.00126826	-	0.0309825	-	ephrin type-B receptor 6-like
XM_005679612.1	DENND2A	100.971	91.161	98.5699	33.7328	23.4405	21.2637	24.0521	22.1509	20.0632	-1.88993	-2.13319	0.000128192	1.91e-05	0.0162729	0.00452622	DENN%2FMADD domain containing 2A
XM_005679611.1	MKRN1	13.2009	15.4594	14.9243	34.8456	44.3492	43.396	40.0973	39.776	38.2084	1.49196	1.43789	0.00104947	1.01e-05	0.0297408	0.00369288	makorin ring finger protein 1
XM_005679607.1	HIPK2	6.31947	5.24002	6.96954	-	-	-	11.2116	12.9519	13.5895	-	1.02681	-	0.00182144	-	0.0246076	homeodomain interacting protein kinase 2
XM_005679606.1	CLEC2L	1.95139	2.05936	1.41587	0.503695	0.291966	0.309763	0.312298	0.141752	0.183017	-2.29546	-3.09054	0.00237371	0.00147928	0.0394524	0.0226642	C-type lectin domain family 2%2C member L
XM_005679597.1	LOC102175184	1.59762	1.63163	1.39103	-	-	-	0.643328	0.280774	0.253757	-	-1.97181	-	0.00143008	-	0.0224193	solute carrier family 23 member 2-like
XM_005679593.1	PLXNA4	15.3428	15.2669	17.0625	3.04659	2.50217	2.42598	2.53642	3.97153	1.99075	-2.57964	-2.48783	2.81e-05	9.64e-05	0.011245	0.00871972	plexin A4
XM_005679586.1	SMO	127.623	97.9199	129.26	46.1723	41.855	45.1977	29.9056	32.4263	30.999	-1.41315	-1.92659	0.00197952	0.0010339	0.0373115	0.0194846	smoothened%2C frizzled family receptor
XM_005679583.1	FLNC	296.259	282.617	243.875	94.2239	60.3692	45.0747	17.9233	86.548	52.9441	-2.04285	-2.38588	0.000628505	0.00092971	0.0250186	0.0186627	filamin C%2C gamma
XM_005679579.1	LOC102190758	4.86125	3.90939	3.73467	11.2562	10.7817	11.8928	-	-	-	1.44005	-	0.000114553	-	0.0162008	-	uncharacterized LOC102190758%2C transcript variant X2
XM_005679576.1	LOC102190100	33.8276	21.04	24.586	82.9689	70.2573	103.072	-	-	-	1.68964	-	0.00458903	-	0.049534	-	retinoic acid receptor responder protein 2-like%2C transcript variant X1
XM_005679558.1	LOC102184403	74.9056	84.5056	77.1496	32.2736	21.8133	19.6628	13.7714	27.1731	9.98099	-1.6815	-2.21575	0.000364787	0.00048809	0.0216375	0.0140309	protein FAM115A-like
XM_005679556.1	EPHA1	16.8708	6.09114	14.5589	-	-	-	49.4039	39.5033	50.7085	-	1.8957	-	0.0021258	-	0.0264271	EPH receptor A1
XM_005679546.1	TRPV6	0.901297	0.570699	0.910305	7.0491	11.4246	8.54994	57.0854	103.864	65.934	3.5038	6.57345	0.00310655	0.00644631	0.0429915	0.0446941	transient receptor potential cation channel%2C subfamily V%2C member 6
XM_005679545.1	LOC102180375	10.1934	7.10628	13.8136	29.6002	31.013	40.4965	39.952	38.8527	45.3644	1.70032	1.9967	0.0040431	0.000374556	0.0475213	0.0128528	ephrin type-B receptor 6-like
XM_005679524.1	SLC37A3	36.432	37.8329	35.5578	12.8945	20.0522	16.7248	16.9263	19.0238	14.5998	-1.14469	-1.11939	0.000764698	0.000163141	0.0267997	0.00988052	solute carrier family 37%2C member 3
XM_005679516.1	ATP6V0A4	0.0604726	0.0435126	0.210611	3.01454	3.23009	3.36939	3.6002	4.01942	3.53057	4.93357	5.14743	1.17e-05	2.38e-05	0.0108542	0.00521345	ATPase%2C H%2B transporting%2C lysosomal V0 subunit a4
XM_005679514.1	TRIM24	0.808727	1.20615	1.01141	-	-	-	0.338865	0.384526	0.299947	-	-1.56426	-	0.00470737	-	0.0379914	tripartite motif containing 24%2C transcript variant X1
XM_005679511.1	CREB3L2	32.1645	43.4706	29.6839	-	-	-	7.57408	13.274	6.37029	-	-1.95212	-	0.00538467	-	0.0407044	cAMP responsive element binding protein 3-like 2
XM_005679506.1	FAM180A	0.143446	0.412861	0.437136	5.34567	4.95778	3.07401	7.0248	5.93945	3.78379	3.75122	4.07541	0.004308	0.00537395	0.0486126	0.0407044	family with sequence similarity 180%2C member A
XM_005679486.1	AKR1B1	23.7068	23.7136	23.0274	10.4787	10.641	5.15537	4.01332	4.47943	3.90382	-1.42286	-2.50661	0.00125909	2.94e-07	0.0309825	0.0007502	aldo-keto reductase family 1%2C member B1 %28aldose reductase%29%2C transcript variant X1
XM_005679479.1	MEST	32.4305	34.2514	26.9381	5.85748	4.78209	3.00356	2.57802	2.64678	2.36812	-2.77864	-3.62409	0.000344433	0.000199835	0.021239	0.0108094	mesoderm specific transcript%2C transcript variant X1
XM_005679444.1	CALU	6.83211	8.77368	7.89018	1.42367	2.72591	2.03348	-	-	-	-1.92602	-	0.00103122	-	0.0297408	-	calumenin%2C transcript variant X4
XM_005679378.1	STK17A	8.31698	10.0204	9.87984	-	-	-	31.0782	35.7576	35.0561	-	1.85239	-	9.41e-05	-	0.00871972	serine%2Fthreonine kinase 17a
XM_005679372.1	NACAD	3.65044	3.56396	3.7323	-	-	-	1.06176	1.60094	1.14004	-	-1.52538	-	0.000169195	-	0.010038	NAC alpha domain containing
XM_005679365.1	NFE2L3	0.545381	0.981063	0.395713	12.6697	16.7279	13.6786	12.3504	19.6105	24.616	4.48609	4.87942	0.000370707	0.0069325	0.0216375	0.0465407	nuclear factor%2C erythroid 2-like 3
XM_005679364.1	SKAP2	4.97137	5.81033	4.8307	2.39273	2.78621	2.38054	-	-	-	-1.04633	-	0.00129465	-	0.0309825	-	src kinase associated phosphoprotein 2
XM_005679358.1	TRIL	47.7216	43.9744	50.5755	17.1855	14.9251	14.8574	11.6284	14.5931	8.01297	-1.5989	-2.05512	0.000102937	0.000181861	0.0156871	0.0103507	TLR4 interactor with leucine-rich repeats
XM_005679312.1	TNS3	1.01393	0.871687	1.26116	0.331394	0.366452	0.363706	0.366683	0.315656	0.0833618	-1.5677	-2.03902	0.0037006	0.00520146	0.0455775	0.040019	tensin 3%2C transcript variant X2
XM_005679299.1	STEAP4	0.125263	0.120176	0.290839	-	-	-	2.14502	2.75253	3.45102	-	3.96048	-	0.00240764	-	0.0277859	STEAP family member 4%2C transcript variant X1
XM_005679297.1	ADAM22	2.35493	3.2614	2.64568	0.294124	0.204586	0.0964697	-	-	-	-3.7951	-	0.00072795	-	0.0262244	-	ADAM metallopeptidase domain 22%2C transcript variant X2
XM_005679249.1	GGCT	0.366922	0.150866	0.456391	-	-	-	2.11398	2.85575	3.09715	-	3.04975	-	0.00157566	-	0.0232432	gamma-glutamylcyclotransferase%2C transcript variant X1
XM_005679232.1	PDE1C	3.71688	4.88665	4.99418	-	-	-	1.23375	1.44999	0.968328	-	-1.89658	-	0.00155153	-	0.0230727	phosphodiesterase 1C%2C calmodulin-dependent 70kDa
XM_005679222.1	CTTNBP2	2.20134	2.85113	2.59816	6.39239	8.03646	5.76187	-	-	-	1.40004	-	0.00403162	-	0.0475213	-	cortactin binding protein 2
XM_005679207.1	FKBP9	301.251	294.978	276.471	119.111	111.891	86.3094	81.3383	110.412	83.8148	-1.45959	-1.66309	0.000118127	7.52e-05	0.0162008	0.00813514	FK506 binding protein 9%2C 63 kDa
XM_005679142.1	NRCAM	0.530251	0.529914	0.333437	1.31166	1.38838	1.0802	-	-	-	1.43966	-	0.00217934	-	0.0379278	-	neuronal cell adhesion molecule
XM_005679117.1	LOC102170111	2.37582	2.95278	2.06859	0.836248	0.775567	0.822842	-	-	-	-1.60326	-	0.00312092	-	0.0429979	-	EF-hand calcium-binding domain-containing protein 10-like
XM_005679010.1	TWIST1	132.933	134.735	212.373	-	-	-	14.8636	26.5774	20.9845	-	-2.94295	-	0.00620171	-	0.0437049	twist basic helix-loop-helix transcription factor 1
XM_005678991.1	SOSTDC1	4.72017	3.96242	6.48432	-	-	-	16.9212	15.9439	16.6379	-	1.70659	-	0.0001397	-	0.00956437	sclerostin domain containing 1
XM_005678988.1	AGMO	0.481733	0.59872	0.457568	-	-	-	1.8503	1.86103	1.26301	-	1.69343	-	0.00479897	-	0.0383203	alkylglycerol monooxygenase
XM_005678965.1	GLCCI1	2.79582	3.28036	2.74131	6.53395	6.87383	6.04537	8.24741	9.60571	6.82111	1.14156	1.48457	0.000275681	0.00300782	0.0199778	0.0308443	glucocorticoid induced transcript 1
XM_005678926.1	C4H7orf57	1.24226	1.13764	1.03245	3.662	5.47459	5.48562	6.94026	5.35283	6.71249	2.09933	2.47759	0.00357786	0.000480746	0.0449886	0.0139735	chromosome 4 open reading frame%2C human C7orf57
XM_005678896.1	UPP1	4.85063	3.419	4.39575	-	-	-	0.950558	0.539321	0.696322	-	-2.53439	-	0.00135134	-	0.0217072	uridine phosphorylase 1
XM_005678872.1	LOC102168321	18.7719	17.1214	26.017	-	-	-	3.45017	6.5917	4.02319	-	-2.13806	-	0.00531493	-	0.0404529	uncharacterized LOC102168321
XM_005678869.1	LOC102191103	3.16776	3.34303	3.00329	-	-	-	1.4871	1.99429	1.18839	-	-1.02671	-	0.00317695	-	0.0318639	uncharacterized LOC102191103
XM_005678864.1	2015-09-02	171.91	177.505	170.683	-	-	-	59.2508	87.5018	56.7551	-	-1.3537	-	0.000470537	-	0.0139735	septin 2
XM_005678851.1	ANKMY1	1.5792	1.51507	1.52776	-	-	-	0.572862	0.420622	0.370275	-	-1.76094	-	7.06e-05	-	0.00800396	ankyrin repeat and MYND domain containing 1
XM_005678836.1	HES6	8.09538	7.47116	6.28239	1.53312	1.57986	1.34093	0.506964	0.383517	0.742743	-2.29442	-3.74177	0.000416527	0.000240814	0.022363	0.0112634	hairy and enhancer of split 6 %28Drosophila%29
XM_005678819.1	LOC102170382	14.0084	16.7022	5.73175	55.2346	70.3281	76.2196	94.0996	65.8828	82.9771	2.46911	2.73703	0.00145859	0.00146981	0.0323712	0.0226642	uncharacterized LOC102170382
XM_005678811.1	SH3D21	3.55737	1.82834	3.62028	10.1065	11.3225	12.8047	13.9742	12.0816	16.5086	1.92646	2.24069	0.000998984	0.00136824	0.0293648	0.0217873	SH3 domain containing 21
XM_005678808.1	ZC3H12A	1.48044	1.76174	2.67715	-	-	-	7.70926	8.87213	6.88896	-	1.98734	-	0.000999406	-	0.0192983	zinc finger CCCH-type containing 12A
XM_005678799.1	LOC102187369	0.119089	0.0856893	0.414755	5.18725	9.08716	7.93971	8.34776	6.22855	4.94232	5.16415	4.97753	0.00345126	0.0032249	0.0442461	0.0320241	bone morphogenetic protein 8A-like
XM_005678794.1	FOXO6	2.21945	2.17771	1.75676	6.54262	9.23765	8.26336	-	-	-	1.96608	-	0.00174377	-	0.0344687	-	forkhead box O6
XM_005678786.1	TIE1	32.067	27.5285	29.0391	-	-	-	13.3768	18.6478	10.8878	-	-1.04648	-	0.00452145	-	0.037082	tyrosine kinase with immunoglobulin-like and EGF-like domains 1
XM_005678777.1	MAST2	33.4524	41.3854	35.5809	15.4435	13.9006	12.3109	7.71437	14.4326	12.5462	-1.40642	-1.67026	0.000831725	0.00124075	0.0278403	0.0211092	microtubule associated serine%2Fthreonine kinase 2
XM_005678755.1	MLPH	0.916714	0.403098	1.50765	-	-	-	6.06401	6.65914	4.65707	-	2.61986	-	0.00197411	-	0.0255459	melanophilin
XM_005678751.1	IQCA1	0.499091	0.802732	0.613484	-	-	-	0.140954	0.191936	0.165207	-	-1.94308	-	0.00624016	-	0.0438451	IQ motif containing with AAA domain 1
XM_005678729.1	GJB5	0.290842	0.104637	0.379848	-	-	-	4.32879	3.96135	4.29621	-	4.02091	-	1.03e-05	-	0.00369288	gap junction protein%2C beta 5%2C 31.1kDa%2C transcript variant X1
XM_005678727.1	GJB3	2.2493	1.45662	3.72101	-	-	-	24.0823	29.0429	25.2357	-	3.3993	-	0.000134203	-	0.00937708	gap junction protein%2C beta 3%2C 31kDa
XM_005678679.1	CDCA8	32.2516	29.1207	41.0992	-	-	-	16.3114	12.8797	14.2063	-	-1.23954	-	0.006134	-	0.0434435	cell division cycle associated 8
XM_005678678.1	MANEAL	6.57331	5.38974	4.17046	-	-	-	0.733943	1.99881	1.5054	-	-1.92855	-	0.0072343	-	0.0473775	mannosidase%2C endo-alpha-like
XM_005678624.1	CTPS1	6.56227	7.36705	7.05983	-	-	-	14.3512	15.7608	20.8806	-	1.28064	-	0.00745482	-	0.0481678	CTP synthase 1%2C transcript variant X1
XM_005678599.1	LEPRE1	158.082	122.845	136.001	64.4588	54.3611	42.0892	43.0219	52.5376	51.8895	-1.37355	-1.49958	0.00216136	0.00111301	0.0379278	0.0199414	leucine proline-enriched proteoglycan %28leprecan%29 1
XM_005678594.1	CCDC23	8.27937	8.80652	8.25347	3.36822	3.6624	2.17139	0.921753	2.61489	2.11007	-1.46136	-2.1659	0.000392066	0.000250162	0.0216375	0.0114407	coiled-coil domain containing 23%2C transcript variant X1
XM_005678592.1	ZNF691	0.486279	0.349898	0.423396	-	-	-	0.133412	0.151388	0.0977294	-	-1.71929	-	0.0023294	-	0.0274511	zinc finger protein 691%2C transcript variant X2
XM_005678585.1	LOC102173632	0.551447	0.440877	0.586834	2.19441	2.20019	2.39266	2.35341	1.93613	1.89637	2.10367	1.96983	2.49e-05	0.000549093	0.0108542	0.0148825	hypoxanthine-guanine phosphoribosyltransferase-like%2C transcript variant X1
XM_005678564.1	ST3GAL3	49.8656	46.0226	45.9258	22.482	20.8506	20.0952	18.8977	24.5834	20.9832	-1.16081	-1.13743	5.99e-05	0.000256249	0.0141412	0.0114735	ST3 beta-galactoside alpha-2%2C3-sialyltransferase 3
XM_005678560.1	B4GALT2	100.694	79.3785	107.225	-	-	-	37.8713	52.9674	47.8123	-	-1.05109	-	0.00645522	-	0.0447133	UDP-Gal:betaGlcNAc beta 1%2C4- galactosyltransferase%2C polypeptide 2
XM_005678559.1	SLC6A9	6.31447	4.81614	3.87603	-	-	-	13.3394	12.9351	18.6327	-	1.58135	-	0.00715929	-	0.0471695	solute carrier family 6 %28neurotransmitter transporter%2C glycine%29%2C member 9
XM_005678556.1	ERI3	51.6889	40.7462	52.345	-	-	-	19.2974	28.2998	22.5818	-	-1.04475	-	0.005626	-	0.0416353	ERI1 exoribonuclease family member 3
XM_005678551.1	PTCH2	10.9506	7.87945	9.72995	-	-	-	28.0979	37.4099	28.0647	-	1.71209	-	0.00258416	-	0.0285446	patched 2
XM_005678526.1	NASP	1.55791	1.53616	1.35645	0.279257	0.673383	0.384693	-	-	-	-1.73462	-	0.00149721	-	0.0327884	-	nuclear autoantigenic sperm protein %28histone-binding%29%2C transcript variant X1
XM_005678511.1	LRRC41	1.23586	1.00041	1.09847	-	-	-	0.494465	0.673311	0.45277	-	-1.0411	-	0.00401612	-	0.035154	leucine rich repeat containing 41%2C transcript variant X1
XM_005678510.1	RAD54L	10.841	8.94096	8.77667	-	-	-	3.40907	4.42106	3.76822	-	-1.3	-	0.00146388	-	0.0226532	RAD54-like %28S. cerevisiae%29
XM_005678492.1	LOC102191200	4.29389	3.4977	4.44403	8.78309	7.78212	8.10216	-	-	-	1.01152	-	0.000572282	-	0.0243248	-	metalloprotease TIKI2-like
XM_005678486.1	GLIS1	4.20499	4.5385	6.22408	-	-	-	1.61511	1.68001	1.42962	-	-1.66354	-	0.00559946	-	0.0416013	GLIS family zinc finger 1
XM_005678464.1	PTGER3	0.56039	0.537632	0.528583	-	-	-	1.56947	2.44245	1.87237	-	1.855	-	0.00518368	-	0.0399473	prostaglandin E receptor 3 %28subtype EP3%29
XM_005678461.1	BEND5	46.895	44.6141	62.3567	7.09055	6.63476	6.54083	3.89382	4.06217	4.55461	-2.92453	-3.62045	0.00133206	0.00107488	0.0312638	0.0197486	BEN domain containing 5
XM_005678460.1	LOC102174897	0.0892326	0.128413	0.0776935	-	-	-	152.218	137.094	156.478	-	10.5598	-	1.46e-05	-	0.00406013	cytochrome P450 4X1-like
XM_005678418.1	ORC1	9.95521	10.2559	12.19	2.47787	5.10683	4.33449	3.52026	5.37204	3.93479	-1.44276	-1.33685	0.00286907	0.00190015	0.041569	0.0250962	origin recognition complex%2C subunit 1
XM_005678403.1	GPX7	203.759	231.612	206.422	109.572	81.2967	79.905	45.32	59.7822	69.4155	-1.24502	-1.87873	0.000706364	0.00016075	0.0259612	0.00986213	glutathione peroxidase 7
XM_005678396.1	CPT2	12.4246	14.0349	13.028	-	-	-	25.0156	29.8421	28.2236	-	1.07312	-	0.000625645	-	0.01589	carnitine palmitoyltransferase 2
XM_005678357.1	PPAP2B	49.4659	53.4311	56.9274	-	-	-	16.4849	30.0249	20.8769	-	-1.24595	-	0.00244751	-	0.0279501	phosphatidic acid phosphatase type 2B%2C transcript variant X1
XM_005678340.1	LOC102190572	1.87396	0.653768	1.82941	-	-	-	5.39833	5.50697	5.19277	-	1.88543	-	0.000672711	-	0.0164091	cytochrome P450 2J2-like
XM_005678330.1	KANK4	10.1873	10.4886	8.34443	-	-	-	1.38742	2.59073	1.35083	-	-2.44513	-	0.000547133	-	0.0148825	KN motif and ankyrin repeat domains 4
XM_005678311.1	CACHD1	1.89385	2.14358	1.53778	0.350153	0.496669	0.506676	0.224763	0.85789	0.194583	-2.04233	-2.126	0.00153544	0.0067868	0.0333219	0.0459763	cache domain containing 1%2C transcript variant X1
XM_005678307.1	DNAJC6	0.655643	0.535514	0.601716	-	-	-	1.49736	1.96943	1.91953	-	1.58703	-	0.00146284	-	0.0226532	DnaJ %28Hsp40%29 homolog%2C subfamily C%2C member 6
XM_005678191.1	LPHN2	0.68573	0.935781	0.65882	-	-	-	0.113528	0.231885	0.216225	-	-2.02153	-	0.00391085	-	0.0346844	latrophilin 2%2C transcript variant X19
XM_005678156.1	DDAH1	13.6517	25.0714	16.7468	-	-	-	0.508093	1.26842	0.707178	-	-4.48115	-	0.00666023	-	0.0454797	dimethylarginine dimethylaminohydrolase 1
XM_005678152.1	CLCA2	0.600647	0.507354	1.02321	6.29426	5.69687	6.11875	-	-	-	3.08703	-	2.36e-05	-	0.0108542	-	chloride channel accessory 2
XM_005678128.1	FRRS1	3.28632	3.22705	3.87124	-	-	-	11.2489	17.5251	12.1837	-	1.97968	-	0.0065869	-	0.0451995	ferric-chelate reductase 1
XM_005678079.1	ABCA4	0.142906	0.0934792	0.090492	0.314379	0.314892	0.321713	0.361771	0.339739	0.255873	1.54067	1.55035	0.000265541	0.00449594	0.0199294	0.0370444	ATP-binding cassette%2C sub-family A %28ABC1%29%2C member 4
XM_005678014.1	NTNG1	4.82661	4.85539	5.61008	2.72152	1.89303	2.29852	0.764946	1.04673	1.10423	-1.14539	-2.39077	0.00134689	0.000118531	0.0313768	0.0089352	netrin G1
XM_005678007.1	CELSR2	4.5955	2.74094	4.14586	25.0173	35.3795	40.9321	33.3243	35.341	20.1039	3.14156	2.95065	0.00310341	0.00586659	0.0429915	0.0424176	cadherin%2C EGF LAG seven-pass G-type receptor 2
XM_005678002.1	CSF1	15.8793	15.3607	14.0022	9.80256	6.58207	5.98016	-	-	-	-1.01644	-	0.00436023	-	0.0488614	-	colony stimulating factor 1 %28macrophage%29
XM_005677998.1	KCNA3	1.11458	1.09746	1.12368	0.283911	0.105324	0.167616	0.253482	0.639195	0.371372	-2.58263	-1.39995	6.24e-05	0.00379436	0.0142165	0.0343364	potassium voltage-gated channel%2C shaker-related subfamily%2C member 3
XM_005677994.1	WNT2B	23.8496	24.8207	19.4925	12.1618	10.7871	9.22533	-	-	-	-1.08308	-	0.00288634	-	0.041569	-	wingless-type MMTV integration site family%2C member 2B
XM_005677987.1	PTGFRN	104.233	95.3579	95.0138	35.7852	39.9285	35.1237	19.1312	26.5202	16.7631	-1.41034	-2.23883	5.39e-05	5.16e-05	0.0136381	0.0068326	prostaglandin F2 receptor inhibitor
XM_005677960.1	SARS	83.3851	75.3583	74.4268	-	-	-	162.338	206.621	252.03	-	1.41318	-	0.00769065	-	0.0487659	seryl-tRNA synthetase
XM_005677959.1	PSRC1	27.2635	23.3005	28.6793	-	-	-	10.6854	8.66955	12.9545	-	-1.29433	-	0.00152712	-	0.0228294	proline%2Fserine-rich coiled-coil 1
XM_005677951.1	AMIGO1	1.55497	1.37707	1.33653	-	-	-	0.535998	0.586499	0.701142	-	-1.22693	-	0.000602894	-	0.0155632	adhesion molecule with Ig-like domain 1%2C transcript variant X1
XM_005677931.1	SLC6A17	7.91939	10.2401	8.0559	1.93537	1.79494	1.34425	1.58113	3.58835	1.6822	-2.36906	-1.93588	0.000801976	0.00291975	0.027385	0.0304255	solute carrier family 6 %28neutral amino acid transporter%29%2C member 17
XM_005677908.1	DENND2D	0.308987	0.333494	0.184958	0.972025	1.47359	1.10359	1.11262	1.11525	0.950881	2.10077	1.94174	0.00445666	0.000386906	0.0492282	0.0129353	DENN%2FMADD domain containing 2D%2C transcript variant X1
XM_005677875.1	RHOC	3.84816	3.31065	3.64188	-	-	-	1.52625	1.64075	2.17723	-	-1.01507	-	0.00202807	-	0.0258703	ras homolog family member C%2C transcript variant X1
XM_005677854.1	DCLRE1B	5.95154	7.2623	5.8028	2.57511	3.49621	2.74281	2.60725	3.94475	2.85522	-1.10937	-1.01542	0.00332405	0.00664914	0.0438598	0.0454347	DNA cross-link repair 1B
XM_005677850.1	OLFML3	620.569	433.702	656.244	113.906	124.463	109.384	72.5801	83.4451	65.4458	-2.2983	-2.94924	0.002779	0.00200116	0.0411566	0.0257187	olfactomedin-like 3
XM_005677828.1	NGF	12.4308	7.84264	9.25474	-	-	-	0.432481	2.25748	1.26724	-	-2.89954	-	0.00424452	-	0.0361882	nerve growth factor %28beta polypeptide%29
XM_005677814.1	IGSF3	24.7883	21.8477	27.1544	9.6664	14.1438	11.4353	8.65831	8.06423	5.39913	-1.066	-1.73797	0.00309028	0.000715111	0.0429915	0.0170043	immunoglobulin superfamily%2C member 3
XM_005677806.1	TRIM45	4.19703	4.65317	3.46785	-	-	-	1.06922	1.07329	1.98824	-	-1.5763	-	0.00408038	-	0.0354333	tripartite motif containing 45%2C transcript variant X1
XM_005677758.1	BCL9	21.8316	20.6066	23.5581	9.83058	10.718	10.8101	6.87864	7.16349	4.70077	-1.07352	-1.81604	0.000223482	0.000168376	0.0192837	0.010038	B-cell CLL%2Flymphoma 9
XM_005677757.1	ACP6	7.50119	6.23365	6.76115	-	-	-	18.8188	16.2318	15.0118	-	1.28838	-	0.00112729	-	0.0200451	acid phosphatase 6%2C lysophosphatidic
XM_005677755.1	GJA5	20.6138	24.8371	17.7482	-	-	-	3.99311	5.6987	5.20419	-	-2.08498	-	0.00161322	-	0.0234533	gap junction protein%2C alpha 5%2C 40kDa
XM_005677743.1	ANKRD35	0.803659	0.4337	0.799697	11.1685	14.2488	19.5733	17.3633	19.1399	22.0266	4.46506	4.84461	0.00432613	0.00015971	0.0487028	0.00986213	ankyrin repeat domain 35
XM_005677741.1	PIAS3	0.917874	0.801974	0.970432	-	-	-	0.220343	0.357191	0.461172	-	-1.37297	-	0.00301528	-	0.0308702	protein inhibitor of activated STAT%2C 3%2C transcript variant X1
XM_005677732.1	TXNIP	101.04	148.446	108.984	-	-	-	280.987	290.147	354.644	-	1.36882	-	0.00231884	-	0.0274449	thioredoxin interacting protein
XM_005677728.1	LOC102180554	7.50258	4.59866	6.77433	29.8555	29.1858	39.6985	21.3459	21.7999	30.687	2.38711	1.96774	0.00161783	0.00442034	0.033494	0.0368183	histone H3-like
XM_005677718.1	RORC	2.0389	1.35973	2.77111	-	-	-	6.87625	7.58605	8.46518	-	1.8938	-	0.000810675	-	0.0177279	RAR-related orphan receptor C
XM_005677711.1	LOC102173987	0.518243	0.839019	1.01526	-	-	-	4.35429	4.79984	3.55423	-	2.42129	-	0.000927634	-	0.0186474	high affinity immunoglobulin gamma Fc receptor I-like
XM_005677703.1	LOC102171395	15.8183	17.928	13.7371	36.1364	42.0124	30.5612	-	-	-	1.19499	-	0.0044024	-	0.0489436	-	histone H2B type 2-E-like
XM_005677678.1	MRPS21	0.66159	0.34003	0.164582	-	-	-	6.94271	6.7454	4.98609	-	4.00116	-	0.000796265	-	0.0175466	mitochondrial ribosomal protein S21%2C transcript variant X2
XM_005677667.1	ECM1	3.23776	2.5186	3.50479	-	-	-	18.612	15.971	19.4201	-	2.54378	-	0.000160718	-	0.00986213	extracellular matrix protein 1%2C transcript variant X1
XM_005677645.1	SETDB1	0.539505	0.460085	0.400148	0.232096	0.143503	0.190313	-	-	-	-1.30651	-	0.00435024	-	0.0488216	-	SET domain%2C bifurcated 1%2C transcript variant X2
XM_005677641.1	FAM63A	0.241916	0.145057	0.070211	-	-	-	0.542024	0.746857	0.85083	-	2.22657	-	0.00560979	-	0.0416023	family with sequence similarity 63%2C member A%2C transcript variant X3
XM_005677636.1	BNIPL	3.67327	2.0767	4.93446	16.8635	24.0721	26.689	23.7834	22.4138	26.0596	2.66204	2.75762	0.00340322	0.000108163	0.043943	0.00880351	BCL2%2Fadenovirus E1B 19kD interacting protein like
XM_005677603.1	SELENBP1	25.4485	30.3784	18.0321	-	-	-	457.904	364.251	374.755	-	4.0184	-	0.000232278	-	0.0112217	selenium binding protein 1
XM_005677577.1	FLG	0.2364	0.0850498	0.102915	13.9011	17.6673	22.7407	61.687	68.5179	86.5934	6.99975	8.99683	0.00217803	0.000630536	0.0379278	0.0158992	filaggrin
XM_005677564.1	IVL	18.5375	3.57569	20.9047	172.733	233.481	243.299	116.346	74.7723	127.331	3.91635	2.88805	0.00088239	0.00557084	0.0285095	0.0414871	involucrin
XM_005677560.1	LOC102183026	3.04015	1.94446	7.74496	-	-	-	290.519	203.05	342.076	-	6.03664	-	0.00250639	-	0.0281595	cornifin alpha-like%2C transcript variant X1
XM_005677546.1	ZBTB7B	19.2229	9.9404	14.8108	-	-	-	67.0357	61.0691	57.1985	-	2.07516	-	0.000275042	-	0.0117023	zinc finger and BTB domain containing 7B
XM_005677543.1	EFNA3	5.38035	4.52387	8.68492	56.2924	74.567	91.3188	85.7389	61.1285	92.4886	3.57918	3.68663	0.00264412	0.00156536	0.0406636	0.0231388	ephrin-A3
XM_005677541.1	TRIM46	1.08141	0.778118	0.741839	-	-	-	0.0944003	0.0357068	0.0461013	-	-3.88391	-	0.00177387	-	0.0243826	tripartite motif containing 46
XM_005677536.1	MEX3A	15.3122	20.345	19.4691	4.15629	4.80019	3.00937	1.71149	2.82488	1.25374	-2.20382	-3.25108	0.000927334	0.000531399	0.0285935	0.0146803	mex-3 RNA binding family member A
XM_005677529.1	NES	254.43	439.919	250.049	-	-	-	2.62615	8.75804	8.6202	-	-5.56101	-	0.00791917	-	0.0496595	nestin
XM_005677520.1	PRR9	1.50343	1.53727	4.34042	1696.9	1990.46	2272.54	2461.11	2122.21	3071.84	9.65723	10.0184	0.000281949	0.000783678	0.0201731	0.0175036	proline rich 9
XM_005677500.1	S100A2	143.533	70.5693	127.466	-	-	-	1213.11	1143.53	1269.21	-	3.40807	-	1.36e-05	-	0.00400562	S100 calcium binding protein A2
XM_005677499.1	S100A16	183.782	116.754	159.192	-	-	-	345.59	337.193	416.643	-	1.2579	-	0.00260787	-	0.0286946	S100 calcium binding protein A16
XM_005677498.1	S100A14	105.837	53.2854	113.369	-	-	-	613.86	478.39	557.021	-	2.59754	-	0.000460107	-	0.0138389	S100 calcium binding protein A14
XM_005677495.1	S100A1	1.93681	2.97305	3.48513	103.361	105.018	144.501	86.1702	96.7964	122.977	5.3935	5.18759	0.00103406	0.000822239	0.0297408	0.0178048	S100 calcium binding protein A1
XM_005677420.1	SHC1	8.02972	6.27473	7.11665	-	-	-	2.84649	3.23004	1.76126	-	-1.45051	-	0.00251468	-	0.0281595	SHC %28Src homology 2 domain containing%29 transforming protein 1%2C transcript variant X2
XM_005677419.1	SHC1	3.65179	3.08279	4.08085	-	-	-	1.46337	1.44123	1.05175	-	-1.45085	-	0.00199365	-	0.0257187	SHC %28Src homology 2 domain containing%29 transforming protein 1%2C transcript variant X1
XM_005677418.1	CKS1B	99.2356	94.9257	101.549	36.3881	55.8618	46.2571	41.4789	50.8843	42.1283	-1.09423	-1.13667	0.000915525	0.000117367	0.0285935	0.0089352	CDC28 protein kinase regulatory subunit 1B
XM_005677415.1	FLAD1	0.135567	0.162577	0.157382	-	-	-	0.347137	0.295434	0.286078	-	1.0276	-	0.0015967	-	0.0233524	flavin adenine dinucleotide synthetase 1%2C transcript variant X2
XM_005677409.1	EFNA1	39.9741	30.3418	39.342	75.8596	91.0368	87.378	77.4931	64.8492	84.2097	1.21338	1.04683	0.000954333	0.00383457	0.0289514	0.0343364	ephrin-A1
XM_005677404.1	THBS3	93.177	89.7017	67.3937	31.7537	25.8759	14.9952	29.4886	16.2092	25.8124	-1.78497	-1.80728	0.00331273	0.00269397	0.0438233	0.0292783	thrombospondin 3
XM_005677391.1	PKLR	1.08068	1.1421	1.41141	0.555715	0.63666	0.482477	0.518855	0.588768	0.285061	-1.1176	-1.38376	0.00415605	0.00548153	0.0482239	0.0410699	pyruvate kinase%2C liver and RBC
XM_005677367.1	ARHGEF2	48.7402	41.5467	41.8836	-	-	-	20.6528	21.2727	17.1896	-	-1.1608	-	0.000796983	-	0.0175466	Rho%2FRac guanine nucleotide exchange factor %28GEF%29 2
XM_005677359.1	RAB25	31.3333	9.6624	33.0525	-	-	-	176.804	151.01	193.941	-	2.81684	-	0.000512312	-	0.0144247	RAB25%2C member RAS oncogene family
XM_005677351.1	TMEM79	16.9206	5.44335	13.5243	-	-	-	61.3802	56.7255	67.7285	-	2.37243	-	0.000429766	-	0.0134722	transmembrane protein 79
XM_005677322.1	KIRREL	78.5228	75.0162	79.1357	23.5878	23.019	20.4755	20.3936	21.6695	15.6518	-1.79431	-2.0113	4.22e-06	1.28e-05	0.00675673	0.00395319	kin of IRRE like %28Drosophila%29
XM_005677263.1	VSIG8	1.31468	1.48652	2.69816	-	-	-	584.041	439.574	598.187	-	8.20412	-	0.0004433	-	0.0136702	V-set and immunoglobulin domain containing 8
XM_005677238.1	TAGLN2	57.4467	58.0846	45.6175	-	-	-	132.198	123.174	129.638	-	1.2565	-	0.00010517	-	0.00880351	transgelin 2%2C transcript variant X2
XM_005677237.1	TAGLN2	0.811667	0.584029	0.353354	-	-	-	1.42888	1.40031	1.52249	-	1.315	-	0.00321396	-	0.0320025	transgelin 2%2C transcript variant X1
XM_005677234.1	KCNJ10	0.0365159	0.380984	0.127176	-	-	-	1.36749	1.85017	1.1687	-	3.00955	-	0.00486756	-	0.0385811	potassium inwardly-rectifying channel%2C subfamily J%2C member 10
XM_005677229.1	PEA15	144.418	121.882	131.594	-	-	-	64.8702	68.2387	65.0848	-	-1.00547	-	0.000548919	-	0.0148825	phosphoprotein enriched in astrocytes 15
XM_005677201.1	ADAMTS4	31.7088	23.8509	34.3608	7.05266	9.0955	6.85025	3.18292	3.37328	1.64973	-1.96712	-3.45391	0.0023217	0.00104794	0.0390951	0.019593	ADAM metallopeptidase with thrombospondin type 1 motif%2C 4
XM_005677199.1	F11R	26.612	23.3461	27.3408	-	-	-	56.4673	66.391	60.261	-	1.24426	-	0.000358187	-	0.0125649	F11 receptor
XM_005677198.1	TSTD1	19.3242	7.238	25.1227	-	-	-	95.3206	93.4542	96.0808	-	2.46242	-	0.000128219	-	0.00936659	thiosulfate sulfurtransferase %28rhodanese%29-like domain containing 1
XM_005677139.1	OLFML2B	2.64531	2.9027	2.53356	-	-	-	1.71458	0.936774	1.00015	-	-1.14615	-	0.00560395	-	0.0416013	olfactomedin-like 2B%2C transcript variant X3
XM_005677116.1	RGS4	27.8665	30.9881	25.7431	11.325	5.23664	2.28583	3.87292	4.50374	1.35992	-2.16625	-3.11913	0.00202712	0.000157169	0.0375914	0.00985574	regulator of G-protein signaling 4%2C transcript variant X1
XM_005677111.1	ALDH9A1	83.0049	74.8633	90.2557	-	-	-	39.5459	28.9902	28.67	-	-1.35194	-	0.000911994	-	0.0185701	aldehyde dehydrogenase 9 family%2C member A1
XM_005677098.1	RXRG	17.6444	11.6105	21.4918	-	-	-	0.921753	2.73941	0.996755	-	-3.44556	-	0.00637508	-	0.0444301	retinoid X receptor%2C gamma%2C transcript variant X1
XM_005677068.1	EPHA2	14.6073	12.3991	15.3763	36.4248	46.229	53.0685	44.1885	43.5835	44.6917	1.67911	1.64405	0.0031796	5.92e-06	0.0433473	0.00369288	EPH receptor A2
XM_005677054.1	LOC102174711	2.11372	1.27756	1.54592	27.8253	32.7132	44.9342	33.2053	28.9276	45.6153	4.41703	4.44782	0.00276341	0.00239055	0.04101	0.0277355	protein-arginine deiminase type-1-like
XM_005677045.1	IFFO2	12.2034	5.53125	5.60548	28.3682	29.6739	37.6145	54.3462	47.4297	32.3758	2.03505	2.52298	0.0026926	0.00572889	0.0409149	0.0418657	intermediate filament family orphan 2
XM_005677034.1	PLA2G2F	0.109359	0.0786882	0.666519	-	-	-	45.1542	27.4067	50.9237	-	7.17492	-	0.00446569	-	0.0369418	phospholipase A2%2C group IIF
XM_005677025.1	RAP1GAP	1.88807	1.21554	0.51913	-	-	-	3.59416	3.50098	4.68324	-	1.70099	-	0.0076972	-	0.0487857	RAP1 GTPase activating protein
XM_005677023.1	HSPG2	167.638	159.911	135.187	-	-	-	64.3023	79.1889	40.0313	-	-1.33423	-	0.00346027	-	0.0330423	heparan sulfate proteoglycan 2
XM_005677019.1	EPHA8	0.697808	0.690391	0.911357	0.168861	0.274065	0.124616	-	-	-	-2.01856	-	0.00244644	-	0.0396901	-	EPH receptor A8
XM_005677001.1	LOC102180903	6.24854	1.80338	5.96364	-	-	-	31.9289	22.4083	28.7505	-	2.5676	-	0.00185387	-	0.0247858	uncharacterized LOC102180903
XM_005676999.1	HMGN2	551.955	554.658	618.982	262.325	292.855	284.491	187.433	231.5	198.421	-1.0392	-1.48292	0.000239513	0.000134006	0.019519	0.00937708	high mobility group nucleosomal binding domain 2
XM_005676997.1	C2H1orf172	4.07833	1.66105	4.01993	-	-	-	14.9257	13.583	13.0446	-	2.09011	-	0.000403394	-	0.013128	chromosome 2 open reading frame%2C human C1orf172
XM_005676996.1	FAM46B	5.06498	1.42072	6.2039	63.4022	70.9781	90.3491	103.042	71.3716	124.998	4.14647	4.56041	0.000973823	0.0036232	0.0292946	0.0335444	family with sequence similarity 46%2C member B
XM_005676993.1	SYTL1	10.1181	2.43841	9.98993	-	-	-	40.49	28.3271	40.6939	-	2.2801	-	0.0038281	-	0.0343364	synaptotagmin-like 1
XM_005676991.1	CD164L2	1.89355	0.425779	3.40042	-	-	-	9.43219	7.99511	8.40789	-	2.17531	-	0.00220277	-	0.0269732	CD164 sialomucin-like 2
XM_005676980.1	COL16A1	328.634	300.828	468.865	-	-	-	106.332	77.6474	93.402	-	-1.98537	-	0.00653102	-	0.0449554	collagen%2C type XVI%2C alpha 1
XM_005676971.1	RNF19B	8.2072	6.25281	6.17586	32.4597	40.3725	41.6309	44.5392	39.17	48.0389	2.47166	2.67455	0.00044585	0.00015506	0.022464	0.0098543	ring finger protein 19B
XM_005676949.1	IRS1	22.5583	22.5173	27.5678	12.8116	9.14394	7.12525	8.50978	10.2208	7.82863	-1.32077	-1.45162	0.00355361	0.00108256	0.0449655	0.0197486	insulin receptor substrate 1
XM_005676946.1	SGPP2	0.0919523	0.0661636	0.0400308	3.51572	5.11792	4.64167	-	-	-	6.06603	-	0.000784595	-	0.0271136	-	sphingosine-1-phosphate phosphatase 2
XM_005676945.1	CHPF	93.9268	74.0563	72.2161	-	-	-	41.4145	32.4546	40.7616	-	-1.06724	-	0.00511601	-	0.0395765	chondroitin polymerizing factor
XM_005676934.1	WNT10A	5.97064	1.11381	4.76534	-	-	-	13.059	13.9753	14.0771	-	1.79468	-	0.00285435	-	0.0301205	wingless-type MMTV integration site family%2C member 10A
XM_005676926.1	IGFBP2	55.2217	49.899	55.1963	11.0746	22.1142	12.3426	8.40789	4.07075	7.14457	-1.81599	-3.03029	0.000611878	2.81e-05	0.0248371	0.00552482	insulin-like growth factor binding protein 2%2C 36kDa
XM_005676924.1	MREG	1.57748	1.19642	1.00228	12.4631	16.5726	14.3342	-	-	-	3.52169	-	0.000388223	-	0.0216375	-	melanoregulin
XM_005676923.1	ABCA12	0.0211796	0.0304792	0.0368815	2.25509	2.59531	1.89619	1.94221	3.63474	3.69468	6.25168	6.71035	0.000389185	0.00597053	0.0216375	0.0427345	ATP-binding cassette%2C sub-family A %28ABC1%29%2C member 12
XM_005676920.1	PADI3	0.0906801	0.195744	0.236862	114.677	186.906	212.333	171.362	114.32	163.482	9.93972	9.74542	0.0042577	0.00110942	0.0483633	0.0199042	peptidyl arginine deiminase%2C type III
XM_005676882.1	EPHB2	6.94889	5.97563	4.44813	-	-	-	0.790477	1.84674	1.66904	-	-2.01231	-	0.00546981	-	0.0410495	EPH receptor B2%2C transcript variant X2
XM_005676860.1	GALE	1.16844	1.2144	1.63905	-	-	-	4.11389	3.53653	3.74416	-	1.5024	-	0.000403976	-	0.013128	UDP-galactose-4-epimerase%2C transcript variant X1
XM_005676843.1	NIPAL3	0.739007	0.924226	0.582162	-	-	-	2.60194	2.05144	2.56199	-	1.6841	-	0.00122557	-	0.0210786	NIPA-like domain containing 3%2C transcript variant X1
XM_005676827.1	STMN1	478.745	477.468	483.585	137.435	206.643	185.194	114.752	101.888	105.612	-1.44378	-2.15961	0.000122075	1.02e-07	0.0162008	0.000456687	stathmin 1
XM_005676810.1	RPS6KA1	0.287397	0.252749	0.333644	0.741833	0.71667	0.57787	-	-	-	1.22064	-	0.00230492	-	0.0389929	-	ribosomal protein S6 kinase%2C 90kDa%2C polypeptide 1%2C transcript variant X3
XM_005676807.1	SFN	200.422	50.7841	171.549	-	-	-	2020.2	1480.32	1993.84	-	3.70006	-	0.000741137	-	0.0171998	stratifin
XM_005676793.1	MAP3K6	4.50758	2.72373	4.5535	-	-	-	13.7024	17.2311	16.4139	-	2.00636	-	0.000637815	-	0.0159151	mitogen-activated protein kinase kinase kinase 6
XM_005676707.1	FAM167B	0.254779	0.183325	0.221833	1.66465	1.54386	1.33464	-	-	-	2.78329	-	0.000194322	-	0.0183826	-	family with sequence similarity 167%2C member B%2C transcript variant X2
XM_005676706.1	FAM167B	0.342769	0.616592	0.149222	2.23954	2.92324	2.69334	-	-	-	2.8251	-	0.000749639	-	0.0265413	-	family with sequence similarity 167%2C member B%2C transcript variant X1
XM_005676695.1	RBBP4	85.9099	106.739	87.7128	-	-	-	35.8289	55.4023	36.708	-	-1.13183	-	0.00530574	-	0.0404481	retinoblastoma binding protein 4
XM_005676688.1	FNDC5	8.50118	12.3706	9.30401	2.25256	1.57749	0.859441	0.45604	0.931481	0.233847	-2.68589	-4.21811	0.00241702	0.00135402	0.0396901	0.0217072	fibronectin type III domain containing 5%2C transcript variant X2
XM_005676687.1	FNDC5	17.5191	24.4668	14.4526	-	-	-	1.10432	1.50375	1.29433	-	-3.85425	-	0.00411075	-	0.035588	fibronectin type III domain containing 5%2C transcript variant X1
XM_005676686.1	TMEM54	7.33323	3.82282	4.56067	-	-	-	94.9181	69.0602	90.6907	-	4.01825	-	0.00059382	-	0.0154866	transmembrane protein 54
XM_005676672.1	PDE6D	19.9055	20.3292	18.5894	8.6238	9.07885	7.87399	8.24673	10.4074	8.46878	-1.20158	-1.11689	6.16e-05	0.0002558	0.0142165	0.0114735	phosphodiesterase 6D%2C cGMP-specific%2C rod%2C delta
XM_005676647.1	PID1	57.6776	69.3389	54.1713	24.5084	17.2718	9.43997	12.6763	19.7842	17.9274	-1.8227	-1.84634	0.00237184	0.000993135	0.0394524	0.0192804	phosphotyrosine interaction domain containing 1
XM_005676617.1	FAM124B	4.47947	5.18154	3.85084	-	-	-	0.326683	1.54459	0.638157	-	-2.42879	-	0.00229277	-	0.0273707	family with sequence similarity 124B
XM_005676611.1	KCNE4	7.75342	5.47655	4.95471	-	-	-	1.29777	1.16261	1.87632	-	-2.06806	-	0.00648968	-	0.0448424	potassium voltage-gated channel%2C Isk-related family%2C member 4
XM_005676601.1	SLC4A3	8.71882	8.6327	9.85396	3.29114	3.72819	3.7704	2.75183	3.30787	3.24583	-1.33424	-1.54774	0.000204636	0.000157898	0.01843	0.00985783	solute carrier family 4 %28anion exchanger%29%2C member 3
XM_005676586.1	PTPRN	0.595443	0.706937	0.59621	0.201726	0.240543	0.283561	-	-	-	-1.38723	-	0.000881756	-	0.0285095	-	protein tyrosine phosphatase%2C receptor type%2C N
XM_005676582.1	LOC102178119	13.1594	11.4744	8.18406	-	-	-	92.872	72.5412	113.585	-	3.0877	-	0.00234671	-	0.0275279	tubulin alpha-1D chain-like
XM_005676581.1	TUBA4A	39.5695	32.1258	27.7343	174.591	244.689	274.804	311.567	265.952	330.709	2.80336	3.19131	0.00268161	0.000159135	0.0409149	0.00986213	tubulin%2C alpha 4a
XM_005676477.1	FZD5	0.0877495	0.441976	0.229207	2.46319	2.67832	1.83867	-	-	-	3.20122	-	0.00158998	-	0.033494	-	frizzled family receptor 5
XM_005676466.1	LOC102171556	0.0486599	0.0700257	0.0423674	6.19371	6.18111	5.63097	-	-	-	6.80478	-	5.66e-06	-	0.00703491	-	aldehyde oxidase-like
XM_005676447.1	PIKFYVE	0.245589	0.206164	0.267289	0.0792396	0.0918622	0.0389847	-	-	-	-1.77509	-	0.00210144	-	0.037851	-	phosphoinositide kinase%2C FYVE finger containing%2C transcript variant X1
XM_005676425.1	CPO	0.218466	0.157196	1.14129	-	-	-	3.00682	4.36416	3.63688	-	2.85929	-	0.00331481	-	0.0323537	carboxypeptidase O
XM_005676410.1	NRP2	0.572056	0.565975	0.581094	1.03823	1.17687	1.33941	-	-	-	1.04798	-	0.00216842	-	0.0379278	-	neuropilin 2%2C transcript variant X5
XM_005676387.1	CARF	0.404825	0.509756	0.440594	-	-	-	0.0647878	0.183794	0.166109	-	-1.70837	-	0.00288283	-	0.0303082	calcium responsive transcription factor%2C transcript variant X1
XM_005676339.1	LOC102187632	1.00756	0.507486	0.789538	-	-	-	39.8412	31.6402	19.334	-	5.30036	-	0.00776469	-	0.0490817	aldehyde oxidase-like
XM_005676322.1	INHBB	8.59103	6.43652	15.7313	-	-	-	40.6516	32.8116	28.2838	-	1.72591	-	0.00664823	-	0.0454347	inhibin%2C beta B
XM_005676260.1	EPB41L5	0.560665	0.662765	1.01119	1.74438	1.65376	1.56385	-	-	-	1.15089	-	0.00338743	-	0.0439084	-	erythrocyte membrane protein band 4.1 like 5%2C transcript variant X2
XM_005676259.1	EPB41L5	2.8397	2.855	3.48858	1.28022	0.803187	0.852145	0.597649	0.720566	0.437802	-1.64538	-2.3867	0.00135726	0.000414691	0.0314438	0.0132068	erythrocyte membrane protein band 4.1 like 5%2C transcript variant X1
XM_005676252.1	DBI	128.928	136.19	125.081	-	-	-	301.593	304.436	315.183	-	1.23932	-	4.67e-06	-	0.00368041	diazepam binding inhibitor %28GABA receptor modulator%2C acyl-CoA binding protein%29
XM_005676251.1	STEAP3	3.28454	2.36337	4.44223	9.2835	12.0695	12.0753	13.9824	14.4826	12.2912	1.72813	2.01408	0.00216176	0.000335501	0.0379278	0.0124319	STEAP family member 3%2C metalloreductase
XM_005676244.1	LYPD1	6.18099	8.27726	6.2039	2.40978	3.15972	2.45292	0.906765	0.935407	0.724628	-1.36488	-3.00895	0.0046153	0.000986762	0.0496361	0.0192804	LY6%2FPLAUR domain containing 1
XM_005676232.1	LRP2	0.167431	0.0490819	0.124183	0.600243	0.868433	0.626058	-	-	-	2.62021	-	0.00316074	-	0.0433362	-	low density lipoprotein receptor-related protein 2
XM_005676231.1	LOC102189805	18.2084	11.0377	22.6948	-	-	-	0.598777	0.543567	0.78953	-	-4.7488	-	0.00799043	-	0.0498856	transcription factor Sp8-like
XM_005676222.1	HOXD8	24.8609	34.2622	25.05	7.6656	6.11946	4.77387	2.98403	10.923	8.53215	-2.18124	-1.90734	0.00243427	0.00614594	0.0396901	0.0434707	homeobox D8
XM_005676220.1	HOXD3	9.29317	8.89639	10.1319	2.65949	1.08817	2.0781	0.0775966	2.46547	0.341056	-2.28138	-3.29569	0.000214495	0.00053957	0.0187325	0.0148254	homeobox D3
XM_005676206.1	GPR39	5.69664	7.85317	6.90689	-	-	-	3.01622	2.49447	2.02226	-	-1.44129	-	0.00329993	-	0.0322388	G protein-coupled receptor 39
XM_005676205.1	NCKAP5	7.23969	12.8298	9.63415	-	-	-	1.01696	1.5157	1.27868	-	-2.96227	-	0.00604958	-	0.0431478	NCK-associated protein 5
XM_005676185.1	THSD7B	0.41097	0.484965	0.458017	-	-	-	0.0315702	0.143296	0.0462528	-	-2.61428	-	0.000785637	-	0.0175036	thrombospondin%2C type I%2C domain containing 7B
XM_005676168.1	KIF5C	2.73965	3.87268	3.07899	0.300919	0.418626	0.0740238	-	-	-	-3.61027	-	0.00107027	-	0.0297408	-	kinesin family member 5C
XM_005676121.1	GALNT13	2.80687	5.09725	3.4525	-	-	-	0.0855636	0.388372	0.156697	-	-4.17059	-	0.0065283	-	0.0449554	UDP-N-acetyl-alpha-D-galactosamine:polypeptide N-acetylgalactosaminyltransferase 13 %28GalNAc-T13%29
XM_005676099.1	DAPL1	0.706563	0.889704	1.53799	163.97	141.289	238.058	187.256	189.392	180.164	7.43753	7.47292	0.00352028	3.18e-07	0.0448095	0.0007502	death associated protein-like 1
XM_005675948.1	CDCA7	26.3673	25.2633	24.8532	9.19872	13.9912	10.9603	8.52806	11.7858	8.45917	-1.16326	-1.41043	0.000659583	0.000179512	0.0254378	0.0103278	cell division cycle associated 7
XM_005675942.1	WIPF1	16.9744	25.3505	19.2638	-	-	-	6.2542	8.10141	7.07658	-	-1.52289	-	0.00635278	-	0.0443535	WAS%2FWASL interacting protein family%2C member 1
XM_005675868.1	COL5A2	762.119	953.59	690.535	285.035	205.446	121.528	149.312	158.748	162.744	-1.97516	-2.35358	0.00284454	0.00120199	0.0415297	0.0207993	collagen%2C type V%2C alpha 2
XM_005675865.1	SLC40A1	22.5541	37.7401	20.5836	-	-	-	59.8675	63.1025	78.8281	-	1.3191	-	0.0072245	-	0.0473599	solute carrier family 40 %28iron-regulated transporter%29%2C member 1
XM_005675855.1	LOC102179605	2.10405	1.38779	0.915981	-	-	-	4.71421	6.30468	7.40003	-	2.06305	-	0.00541053	-	0.0407875	cytochrome P450 27C1-like
XM_005675845.1	MFSD6	3.44274	4.58048	3.0164	13.8536	18.9713	16.993	17.4232	22.083	23.318	2.17397	2.50863	0.001162	0.000741488	0.0304999	0.0171998	major facilitator superfamily domain containing 6
XM_005675841.1	GPR17	5.56609	7.53889	9.01556	1.03	1.02875	1.28636	0.117899	0.401355	0.546982	-2.72526	-4.37479	0.00336002	0.00222947	0.0438598	0.0270191	G protein-coupled receptor 17
XM_005675836.1	LOC102173614	7.3056	5.94609	6.98654	-	-	-	15.3527	16.7037	20.5132	-	1.37714	-	0.00252333	-	0.0282246	glutaredoxin-1-like
XM_005675832.1	SAP130	0.238536	0.205964	0.290766	-	-	-	0.04581	0.103965	0.0335577	-	-2.0038	-	0.00501157	-	0.0391221	Sin3A-associated protein%2C 130kDa%2C transcript variant X2
XM_005675794.1	EAF1	19.035	25.042	25.4786	63.9373	74.9831	85.1008	79.5229	63.6157	54.7565	1.6874	1.5085	0.00133898	0.00475564	0.0313226	0.0381749	ELL associated factor 1
XM_005675789.1	HLCS	5.43599	5.37821	5.55005	-	-	-	12.3039	16.2534	11.676	-	1.29784	-	0.00515666	-	0.0398257	holocarboxylase synthetase %28biotin-%28proprionyl-CoA-carboxylase %28ATP-hydrolysing%29%29 ligase%29
XM_005675788.1	CLDN14	0.122307	0.17601	0.212982	2.01259	2.41554	2.09682	-	-	-	3.67372	-	8.98e-05	-	0.0154104	-	claudin 14
XM_005675785.1	RUNX1	1.78231	2.56489	1.05524	-	-	-	4.31281	5.12699	4.06197	-	1.32146	-	0.00757205	-	0.0484912	runt-related transcription factor 1
XM_005675776.1	POFUT2	139.211	127.118	136.141	55.9095	51.6473	60.1095	39.0397	43.2038	39.5677	-1.26329	-1.72423	5.74e-05	1.72e-05	0.0141412	0.00434117	protein O-fucosyltransferase 2
XM_005675756.1	SLC37A1	0.154024	0.0277067	0.0670532	-	-	-	0.62857	0.419569	0.460453	-	2.60024	-	0.00476786	-	0.03824	solute carrier family 37 %28glucose-6-phosphate transporter%29%2C member 1
XM_005675751.1	C2CD2	8.47876	12.0927	7.07473	-	-	-	29.174	21.7218	26.8027	-	1.4908	-	0.00328957	-	0.0322388	C2 calcium-dependent domain containing 2
[truncated: 62 more rows]
