# Supplementary material for: Comparative Transcriptome Analysis of Fetal Skin Reveals Key Genes Related to Hair Follicle Morphogenesis in Cashmere Goats
Source: PLoS One. 2016 Mar 9;11(3):e0151118. doi: 10.1371/journal.pone.0151118 (PMC4784850; doi:10.1371/journal.pone.0151118)
Supplement: S4 Table — (XLSX) [file pone.0151118.s010.xlsx]

## Sheet: S4 Table
S4 Table. List of KEGG pathways for DEGs between different developmental stages
Pathway	all (1142)	P value	q value	Pathway ID
Metabolic pathways	141	0.451759	0.763	ko01100
Pathways in cancer	64	0.0015578	0.0407	ko05200
Focal adhesion	37	0.0331275	0.19	ko04510
Regulation of actin cytoskeleton	37	0.0510689	0.228	ko04810
Cell adhesion molecules (CAMs)	35	2.18e-07	4.76e-05	ko04514
Axon guidance	34	0.000233485	0.00951	ko04360
Endocytosis	33	0.126408	0.405	ko04144
MAPK signaling pathway	33	0.402939	0.726	ko04010
Pathogenic Escherichia coli infection	32	1e-06	7.3e-05	ko05130
Tight junction	30	0.00189904	0.0407	ko04530
Calcium signaling pathway	30	0.00655711	0.0715	ko04020
Chemokine signaling pathway	29	0.0579879	0.243	ko04062
Phagosome	28	0.0026016	0.0407	ko04145
Leukocyte transendothelial migration	26	0.00242471	0.0407	ko04670
Neuroactive ligand-receptor interaction	25	0.018387	0.158	ko04080
Glutamatergic synapse	24	0.00627064	0.0715	ko04724
ECM-receptor interaction	23	0.000261667	0.00951	ko04512
Amoebiasis	23	0.00781508	0.0763	ko05146
Cytokine-cytokine receptor interaction	23	0.430766	0.748	ko04060
Purine metabolism	23	0.467032	0.782	ko00230
Staphylococcus aureus infection	22	8.7e-07	7.3e-05	ko05150
Vascular smooth muscle contraction	22	0.0477332	0.228	ko04270
Tuberculosis	22	0.135466	0.41	ko05152
Wnt signaling pathway	22	0.362854	0.7	ko04310
Toxoplasmosis	21	0.0234013	0.16	ko05145
Cell cycle	21	0.216606	0.556	ko04110
Neurotrophin signaling pathway	20	0.320766	0.695	ko04722
Glycerophospholipid metabolism	19	0.00229575	0.0407	ko00564
GnRH signaling pathway	19	0.0211417	0.16	ko04912
Fc gamma R-mediated phagocytosis	19	0.0432126	0.228	ko04666
Melanogenesis	19	0.0565443	0.242	ko04916
p53 signaling pathway	17	0.00594205	0.0715	ko04115
Dilated cardiomyopathy	17	0.17064	0.474	ko05414
Insulin signaling pathway	17	0.630685	0.91	ko04910
Lysosome	17	0.734169	0.949	ko04142
Arginine and proline metabolism	16	0.000732719	0.0228	ko00330
Rheumatoid arthritis	16	0.0117881	0.107	ko05323
Arrhythmogenic right ventricular cardiomyopathy (ARVC)	16	0.0292388	0.182	ko05412
VEGF signaling pathway	16	0.0453392	0.228	ko04370
Small cell lung cancer	16	0.0944496	0.332	ko05222
Osteoclast differentiation	16	0.346481	0.695	ko04380
Oocyte meiosis	16	0.433213	0.748	ko04114
Malaria	15	0.000172871	0.00942	ko05144
Basal cell carcinoma	15	0.00572435	0.0715	ko05217
Gap junction	15	0.0823313	0.299	ko04540
Pancreatic secretion	15	0.106196	0.356	ko04972
TGF-beta signaling pathway	15	0.212223	0.556	ko04350
Pyrimidine metabolism	15	0.3797	0.719	ko00240
Bile secretion	14	0.0321443	0.189	ko04976
Salivary secretion	14	0.0409252	0.223	ko04970
Protein digestion and absorption	14	0.0633216	0.257	ko04974
Phosphatidylinositol signaling system	14	0.0846923	0.303	ko04070
Gastric acid secretion	14	0.101212	0.345	ko04971
Adherens junction	14	0.308201	0.686	ko04520
Hypertrophic cardiomyopathy (HCM)	14	0.323163	0.695	ko05410
Cholinergic synapse	14	0.384469	0.719	ko04725
Hepatitis C	14	0.626057	0.91	ko05160
Glycerolipid metabolism	13	0.00212643	0.0407	ko00561
Bladder cancer	13	0.00417168	0.0606	ko05219
Epithelial cell signaling in Helicobacter pylori infection	13	0.0788486	0.296	ko05120
Prostate cancer	13	0.652722	0.913	ko05215
Arachidonic acid metabolism	12	0.00640966	0.0715	ko00590
Valine, leucine and isoleucine degradation	12	0.0261368	0.168	ko00280
Lysine degradation	12	0.0511894	0.228	ko00310
Vibrio cholerae infection	12	0.0646866	0.257	ko05110
Viral myocarditis	12	0.0981662	0.34	ko05416
Glioma	12	0.140398	0.419	ko05214
PPAR signaling pathway	12	0.164665	0.466	ko03320
Systemic lupus erythematosus	12	0.23347	0.585	ko05322
Chronic myeloid leukemia	12	0.263749	0.618	ko05220
ErbB signaling pathway	12	0.51257	0.823	ko04012
Natural killer cell mediated cytotoxicity	12	0.608155	0.91	ko04650
T cell receptor signaling pathway	12	0.707055	0.945	ko04660
Measles	12	0.744315	0.949	ko05162
Hedgehog signaling pathway	11	0.0441631	0.228	ko04340
Mineral absorption	11	0.0647447	0.257	ko04978
Non-small cell lung cancer	11	0.0814457	0.299	ko05223
Fc epsilon RI signaling pathway	11	0.246514	0.591	ko04664
Hematopoietic cell lineage	11	0.262591	0.618	ko04640
Bacterial invasion of epithelial cells	11	0.590146	0.893	ko05100
Chagas disease (American trypanosomiasis)	11	0.621945	0.91	ko05142
Jak-STAT signaling pathway	11	0.793444	0.977	ko04630
Type II diabetes mellitus	10	0.0311204	0.188	ko04930
Inositol phosphate metabolism	10	0.152	0.442	ko00562
Influenza A	10	0.992128	1	ko05164
Alzheimer's disease	10	0.999417	1	ko05010
Fat digestion and absorption	9	0.0076598	0.0763	ko04975
Fatty acid metabolism	9	0.0467019	0.228	ko00071
Long-term depression	9	0.353029	0.695	ko04730
Pertussis	9	0.392451	0.719	ko05133
Glycolysis / Gluconeogenesis	9	0.392451	0.719	ko00010
Melanoma	9	0.451764	0.763	ko05218
Acute myeloid leukemia	9	0.529202	0.83	ko05221
Progesterone-mediated oocyte maturation	9	0.715305	0.945	ko04914
Shigellosis	9	0.729579	0.949	ko05131
Oxidative phosphorylation	9	0.988403	1	ko00190
Huntington's disease	9	0.9999	1	ko05016
Other types of O-glycan biosynthesis	8	0.0195125	0.158	ko00514
African trypanosomiasis	8	0.0242536	0.16	ko05143
Ether lipid metabolism	8	0.0242536	0.16	ko00565
Nicotinate and nicotinamide metabolism	8	0.0242536	0.16	ko00760
Mucin type O-Glycan biosynthesis	8	0.0360351	0.201	ko00512
Glycine, serine and threonine metabolism	8	0.0511599	0.228	ko00260
Thyroid cancer	8	0.132578	0.41	ko05216
Leishmaniasis	8	0.334762	0.695	ko05140
Antigen processing and presentation	8	0.39781	0.723	ko04612
Colorectal cancer	8	0.637214	0.91	ko05210
Adipocytokine signaling pathway	8	0.654741	0.913	ko04920
Pancreatic cancer	8	0.704237	0.945	ko05212
Renal cell carcinoma	8	0.788605	0.977	ko05211
Cardiac muscle contraction	8	0.823468	0.992	ko04260
Peroxisome	8	0.887401	1	ko04146
alpha-Linolenic acid metabolism	7	0.00261198	0.0407	ko00592
Glycosaminoglycan biosynthesis - keratan sulfate	7	0.00805215	0.0763	ko00533
Glycosaminoglycan biosynthesis - heparan sulfate	7	0.0191307	0.158	ko00534
Alanine, aspartate and glutamate metabolism	7	0.0556198	0.242	ko00250
Collecting duct acid secretion	7	0.151485	0.442	ko04966
Endocrine and other factor-regulated calcium reabsorption	7	0.42619	0.748	ko04961
Endometrial cancer	7	0.578938	0.883	ko05213
Long-term potentiation	7	0.740855	0.949	ko04720
Toll-like receptor signaling pathway	7	0.853336	1	ko04620
B cell receptor signaling pathway	7	0.91032	1	ko04662
RNA transport	7	0.999986	1	ko03013
Protein processing in endoplasmic reticulum	7	0.999995	1	ko04141
Linoleic acid metabolism	6	0.0234441	0.16	ko00591
Histidine metabolism	6	0.048624	0.228	ko00340
Vitamin digestion and absorption	6	0.0721169	0.281	ko04977
Proximal tubule bicarbonate reclamation	6	0.117498	0.382	ko04964
Tryptophan metabolism	6	0.135177	0.41	ko00380
Olfactory transduction	6	0.154023	0.442	ko04740
beta-Alanine metabolism	6	0.17395	0.474	ko00410
Circadian rhythm - mammal	6	0.17395	0.474	ko04710
Fatty acid elongation in mitochondria	6	0.216661	0.556	ko00062
Taste transduction	6	0.239232	0.587	ko04742
Prion diseases	6	0.286248	0.65	ko05020
Aldosterone-regulated sodium reabsorption	6	0.334997	0.695	ko04960
ABC transporters	6	0.384586	0.719	ko02010
Fructose and mannose metabolism	6	0.483029	0.798	ko00051
Complement and coagulation cascades	6	0.506972	0.823	ko04610
Glutathione metabolism	6	0.697734	0.945	ko00480
Amyotrophic lateral sclerosis (ALS)	6	0.715547	0.945	ko05014
Notch signaling pathway	6	0.715547	0.945	ko04330
Parkinson's disease	6	0.998836	1	ko05012
Ubiquitin mediated proteolysis	6	0.999983	1	ko04120
Steroid hormone biosynthesis	5	0.112732	0.372	ko00140
Glycosphingolipid biosynthesis - lacto and neolacto series	5	0.226069	0.573	ko00601
Cysteine and methionine metabolism	5	0.305502	0.686	ko00270
Galactose metabolism	5	0.332908	0.695	ko00052
Propanoate metabolism	5	0.470191	0.782	ko00640
Drug metabolism - cytochrome P450	5	0.548406	0.848	ko00982
Pyruvate metabolism	5	0.548406	0.848	ko00620
Sphingolipid metabolism	5	0.643104	0.91	ko00600
Apoptosis	5	0.9627	1	ko04210
RNA degradation	5	0.965931	1	ko03018
Pentose and glucuronate interconversions	4	0.176694	0.476	ko00040
Intestinal immune network for IgA production	4	0.327676	0.695	ko04672
Retinol metabolism	4	0.327676	0.695	ko00830
Glycosaminoglycan biosynthesis - chondroitin sulfate	4	0.359382	0.7	ko00532
Tyrosine metabolism	4	0.422468	0.748	ko00350
Drug metabolism - other enzymes	4	0.513652	0.823	ko00983
Pentose phosphate pathway	4	0.672236	0.927	ko00030
DNA replication	4	0.736726	0.949	ko03030
Base excision repair	4	0.791144	0.977	ko03410
Amino sugar and nucleotide sugar metabolism	4	0.943367	1	ko00520
mRNA surveillance pathway	4	0.998659	1	ko03015
Ascorbate and aldarate metabolism	3	0.0765922	0.293	ko00053
Renin-angiotensin system	3	0.203063	0.54	ko04614
Riboflavin metabolism	3	0.239807	0.587	ko00740
Phenylalanine metabolism	3	0.277519	0.637	ko00360
Primary bile acid biosynthesis	3	0.277519	0.637	ko00120
Glycosphingolipid biosynthesis - globo series	3	0.354013	0.695	ko00603
Type I diabetes mellitus	3	0.354013	0.695	ko04940
Phototransduction	3	0.354013	0.695	ko04744
Steroid biosynthesis	3	0.429405	0.748	ko00100
Butanoate metabolism	3	0.568429	0.873	ko00650
Biosynthesis of unsaturated fatty acids	3	0.629607	0.91	ko01040
Phototransduction - fly	3	0.657853	0.913	ko04745
Metabolism of xenobiotics by cytochrome P450	3	0.870711	1	ko00980
Vasopressin-regulated water reabsorption	3	0.941519	1	ko04962
RIG-I-like receptor signaling pathway	3	0.961428	1	ko04622
mTOR signaling pathway	3	0.97974	1	ko04150
Ribosome	3	1	1	ko03010
Spliceosome	3	1	1	ko03040
Asthma	2	0.386943	0.719	ko05310
Graft-versus-host disease	2	0.43564	0.748	ko05332
Allograft rejection	2	0.526219	0.83	ko05330
Sulfur metabolism	2	0.526219	0.83	ko00920
One carbon pool by folate	2	0.642489	0.91	ko00670
Autoimmune thyroid disease	2	0.642489	0.91	ko05320
Selenocompound metabolism	2	0.675886	0.927	ko00450
Glycosaminoglycan degradation	2	0.76098	0.959	ko00531
Dorso-ventral axis formation	2	0.806331	0.977	ko04320
Glyoxylate and dicarboxylate metabolism	2	0.806331	0.977	ko00630
Glycosphingolipid biosynthesis - ganglio series	2	0.806331	0.977	ko00604
Starch and sucrose metabolism	2	0.899768	1	ko00500
Porphyrin and chlorophyll metabolism	2	0.910485	1	ko00860
Carbohydrate digestion and absorption	2	0.936537	1	ko04973
NOD-like receptor signaling pathway	2	0.978142	1	ko04621
Aminoacyl-tRNA biosynthesis	2	0.978142	1	ko00970
Nucleotide excision repair	2	0.989492	1	ko03420
N-Glycan biosynthesis	2	0.995602	1	ko00510
Biotin metabolism	1	0.131703	0.41	ko00780
D-Glutamine and D-glutamate metabolism	1	0.246074	0.591	ko00471
Phenylalanine, tyrosine and tryptophan biosynthesis	1	0.345392	0.695	ko00400
Maturity onset diabetes of the young	1	0.506526	0.823	ko04950
Vitamin B6 metabolism	1	0.628022	0.91	ko00750
Ubiquinone and other terpenoid-quinone biosynthesis	1	0.719625	0.945	ko00130
Synthesis and degradation of ketone bodies	1	0.75659	0.959	ko00072
Circadian rhythm - fly	1	0.788685	0.977	ko04711
Non-homologous end-joining	1	0.840745	1	ko03450
Regulation of autophagy	1	0.961324	1	ko04140
Protein export	1	0.970865	1	ko03060
Glycosylphosphatidylinositol(GPI)-anchor biosynthesis	1	0.978053	1	ko00563
Primary immunodeficiency	1	0.980953	1	ko05340
Homologous recombination	1	0.98347	1	ko03440
SNARE interactions in vesicular transport	1	0.997385	1	ko04130
Basal transcription factors	1	0.998884	1	ko03022
Ribosome biogenesis in eukaryotes	1	0.999995	1	ko03008
