# Supplementary material for: Comparative Transcriptome Analysis of Fetal Skin Reveals Key Genes Related to Hair Follicle Morphogenesis in Cashmere Goats
Source: PLoS One. 2016 Mar 9;11(3):e0151118. doi: 10.1371/journal.pone.0151118 (PMC4784850; doi:10.1371/journal.pone.0151118)
Supplement: S5 Table — (XLSX) [file pone.0151118.s011.xlsx]

## Sheet: S5 Table
S5 Table. List of genes with different expression in eight profiles
GeneID	Profile	log2 Fold Change			Gene_Symbol	Gene_description
		E60	E120	NB
XM_005693788.1	6	0	9.62	10.06	KRT25	keratin 25
XM_005696915.1	6	0	1.68	1.61	DSP	desmoplakin
XM_005693799.1	6	0	10.71	11.11	KRTAP3-1	keratin associated protein 3-1
XM_005693790.1	6	0	9.86	10.39	KRT27	keratin 27
XM_005679942.1	6	0	10.88	10.79	LOC102185436	keratin%2C type II microfibrillar%2C component 7C-like
XM_005677520.1	6	0	9.66	10.02	PRR9	proline rich 9
XM_005674694.1	6	0	10.62	10.8	KRTAP11-1	keratin associated protein 11-1
XR_310808.1	6	0	10.86	10.79	LOC102176726	keratin%2C type I microfibrillar 48 kDa%2C component 8C-1-like
XM_005674701.1	6	0	11.26	11.29	LOC100861175	keratin associated protein 13.1
XM_005680097.1	6	0	10.85	10.88	LOC102183211	keratin%2C type II cuticular Hb1-like
XM_005693813.1	6	0	11	11.13	LOC102176457	keratin%2C type I cuticular Ha4-like
XM_005674695.1	6	0	9.46	10.82	LOC100861181	keratin associated protein 7.1
XR_310804.1	6	0	11	11.15	LOC102172095	uncharacterized LOC102172095
XM_005694312.1	6	0	10.11	10.7	LOC102179881	keratin%2C type I microfibrillar%2C 47.6 kDa-like
XM_005684810.1	6	0	1.95	2.33	PERP	PERP%2C TP53 apoptosis effector
XM_005679937.1	6	0	11.04	10.96	LOC102184223	keratin%2C type II microfibrillar%2C component 5-like%2C transcript variant X1
XM_005693797.1	6	0	11.19	11.33	LOC102170546	keratin-associated protein 3-3-like
XM_005684413.1	7	0	0.95	1.52	GSN	gelsolin
XM_005684517.1	6	0	2.71	2.62	GJA1	gap junction protein%2C alpha 1%2C 43kDa
XM_005700001.1	6	0	7.24	7.71	CST6	cystatin E%2FM
XM_005674699.1	6	0	9.77	11.26	LOC100860930	high-glycine tyrosine keratin type II.6
XM_005693796.1	6	0	11.57	11.66	LOC102170264	keratin-associated protein 3-3-like
XM_005697107.1	6	0	2.36	2.85	DSG1	desmoglein 1
XM_005683525.1	6	0	0.99	1.25	CTSB	cathepsin B
XM_005689645.1	6	0	3.26	3.16	TRIM29	tripartite motif containing 29
XM_005676807.1	6	0	3.68	3.7	SFN	stratifin
XM_005698433.1	6	0	1.89	1.93	COL17A1	collagen%2C type XVII%2C alpha 1
XM_005688054.1	1	0	-1.58	-1.27	VIM	vimentin
XM_005680707.1	6	0	4.63	5.14	FAR2	fatty acyl CoA reductase 2
XM_005693810.1	6	0	10.09	9.71	KRT35	keratin 35
XM_005677732.1	7	0	0.41	1.37	TXNIP	thioredoxin interacting protein
XM_005692180.1	6	0	2.33	2.31	CDH1	cadherin 1%2C type 1%2C E-cadherin %28epithelial%29
XM_005687084.1	6	0	1.62	1.94	SDC1	syndecan 1
XM_005697305.1	6	0	2.53	2.93	SERPINB5	serpin peptidase inhibitor%2C clade B %28ovalbumin%29%2C member 5
XM_005697501.1	6	0	1.94	1.68	EMP2	epithelial membrane protein 2
XM_005684642.1	6	0	2.76	2.62	AIM1	absent in melanoma 1
XM_005691128.1	6	0	2.8	2.88	PKP1	plakophilin 1 %28ectodermal dysplasia%2Fskin fragility syndrome%29
XM_005685885.1	6	0	2.2	2.42	LGALS3	lectin%2C galactoside-binding%2C soluble%2C 3
XM_005693764.1	6	0	9.89	10.05	GSDMA	gasdermin A
XM_005709623.1	6	0	8.4	9.06	ASPRV1	aspartic peptidase%2C retroviral-like 1
XM_005680101.1	6	0	5.37	5.31	KRT80	keratin 80
XM_005681450.1	3	0	0.11	-3.17	SPP1	secreted phosphoprotein 1
XM_005693814.1	6	0	5.6	6.16	LOC102176997	keratin%2C type I cytoskeletal 42-like
XM_005675457.1	6	0	2.06	2.78	TM4SF1	transmembrane 4 L six family member 1
XM_005674706.1	6	0	11.89	11.08	LOC102182256	keratin-associated protein 26-1-like
XM_005692870.1	6	0	3.82	4.05	KLK10	kallikrein-related peptidase 10
XM_005683560.1	7	0	1.55	2.25	CLU	clusterin
XM_005697965.1	6	0	4.14	4.12	MYH11	myosin%2C heavy chain 11%2C smooth muscle
XM_005687571.1	6	0	5	5.27	GJB2	gap junction protein%2C beta 2%2C 26kDa
XM_005689130.1	6	0	6.39	5.07	LOC100861279	adipocyte fatty acid-binding protein
XM_005692528.1	6	0	1.16	1.1	ACTN4	actinin%2C alpha 4
XM_005680093.1	6	0	7.22	7.87	KRT79	keratin 79
XM_005692750.1	6	0	7.11	7.89	KLK7	kallikrein-related peptidase 7
XM_005694673.1	6	0	2.23	2.58	ELOVL7	ELOVL fatty acid elongase 7
XM_005697938.1	6	0	2.24	2.34	PPL	periplakin
XM_005693255.1	6	0	7.24	7.1	FOXN1	forkhead box N1
XM_005675865.1	6	0	1.32	1.32	SLC40A1	solute carrier family 40 %28iron-regulated transporter%29%2C member 1
XM_005687261.1	6	0	3.46	3.69	CRAT	carnitine O-acetyltransferase
XM_005692259.1	7	0	8.05	11.63	LOC102169125	major allergen I polypeptide chain 2-like
XM_005700013.1	6	0	3.31	3.37	SPTBN2	spectrin%2C beta%2C non-erythrocytic 2
XM_005688063.1	6	0	1.24	1.54	DSTN	destrin %28actin depolymerizing factor%29
XM_005675093.1	7	0	2.79	4.76	APOD	apolipoprotein D
XM_005697013.1	6	0	10.48	10.53	DSG4	desmoglein 4
XM_005689231.1	6	0	2.46	2.73	ESRP1	epithelial splicing regulatory protein 1
XM_005692599.1	6	0	1.97	2.07	LYPD3	LY6%2FPLAUR domain containing 3
XM_005694267.1	6	0	6.4	6.27	DLX3	distal-less homeobox 3
XM_005686382.1	6	0	7.69	7.97	ATP6V1B1	ATPase%2C H%2B transporting%2C lysosomal 56%2F58kDa%2C V1 subunit B1
XM_005687630.1	6	0	1.6	1.87	SHISA2	shisa family member 2
XM_005677498.1	6	0	2.26	2.6	S100A14	S100 calcium binding protein A14
XR_311002.1	6	0	2.89	1.83	LOC102178315	heat shock 70 kDa protein 1B-like
XM_005677499.1	6	0	1.42	1.26	S100A16	S100 calcium binding protein A16
XM_005677500.1	6	0	2.54	3.41	S100A2	S100 calcium binding protein A2
XM_005698356.1	6	0	7.43	7.45	ELOVL3	ELOVL fatty acid elongase 3
XM_005686596.1	6	0	2.1	2.58	EPCAM	epithelial cell adhesion molecule
XM_005681671.1	6	0	3.06	3.14	LAP3	leucine aminopeptidase 3
XM_005686245.1	6	0	6.74	6.69	PROM2	prominin 2
XM_005693605.1	6	0	1.97	2.29	ALDH3A2	aldehyde dehydrogenase 3 family%2C member A2
XM_005695474.1	6	0	1.92	2.52	AHNAK2	AHNAK nucleoprotein 2
XM_005692028.1	6	0	2.42	2.63	GPR56	G protein-coupled receptor 56
XM_005693794.1	6	0	9.47	9.47	KRT23	keratin 23 %28histone deacetylase inducible%29
XM_005681020.1	6	0	1.38	1.87	CD9	CD9 molecule
XM_005684457.1	6	0	5	5.89	ELOVL4	ELOVL fatty acid elongase 4
XM_005686110.1	6	0	1.09	1.34	ACTN1	actinin%2C alpha 1
XM_005688435.1	7	0	0.97	1.44	FAM210B	family with sequence similarity 210%2C member B
XM_005681389.1	6	0	2.93	3.83	SLC39A8	solute carrier family 39 %28zinc transporter%29%2C member 8
XM_005695052.1	6	0	3.81	3.98	CTSH	cathepsin H
XM_005691559.1	6	0	2.05	1.82	ALDH2	aldehyde dehydrogenase 2 family %28mitochondrial%29
XM_005677577.1	6	0	7	9	FLG	filaggrin
XM_005685300.1	6	0	1.68	1.89	JMY	junction mediating and regulatory protein%2C p53 cofactor
XM_005677263.1	6	0	9.33	8.2	VSIG8	V-set and immunoglobulin domain containing 8
XM_005694534.1	6	0	1.75	1.78	ATP6V0E1	ATPase%2C H%2B transporting%2C lysosomal 9kDa%2C V0 subunit e1
XM_005698429.1	1	0	-1.12	-1.45	SH3PXD2A	SH3 and PX domains 2A
XM_005684139.1	6	0	2.22	2.41	C8H9orf3	chromosome 8 open reading frame%2C human C9orf3
XM_005691651.1	6	0	1.98	2.3	LIMK2	LIM domain kinase 2
XM_005698563.1	6	0	1.19	1.37	TACC2	transforming%2C acidic coiled-coil containing protein 2
XM_005684944.1	6	0	1.65	1.78	EZR	ezrin
XM_005689457.1	7	0	2.21	3.05	C15H11orf34	chromosome 15 open reading frame%2C human C11orf34
XM_005688097.1	6	0	4.44	4.66	LOC102175311	calmodulin-like
XM_005698829.1	6	0	2.87	3.72	STAR	steroidogenic acute regulatory protein
XM_005697286.1	7	0	0.98	1.59	MBD2	methyl-CpG binding domain protein 2
XM_005696495.1	6	0	1.76	1.78	C23H6orf132	chromosome 23 open reading frame%2C human C6orf132
XM_005688727.1	1	0	-1.31	-1.43	SULF2	sulfatase 2
XM_005680985.1	1	0	-1.47	-1.41	CCND2	cyclin D2
XM_005689491.1	6	0	2.22	2.54	TAGLN	transgelin
XM_005687312.1	0	0	-0.58	-1.13	PRRC2B	proline-rich coiled-coil 2B
XM_005680072.1	6	0	1.19	1.2	BTG1	B-cell translocation gene 1%2C anti-proliferative
XM_005678460.1	7	0	6.6	10.56	LOC102174897	cytochrome P450 4X1-like
XM_005709398.1	1	0	-1.1	-1.07	TUBA1A	tubulin%2C alpha 1a
XM_005693791.1	6	0	8.84	8.99	KRT28	keratin 28
XM_005688996.1	6	0	3.63	3.96	SDR16C5	short chain dehydrogenase%2Freductase family 16C%2C member 5
XM_005680136.1	6	0	4.4	5.14	VDR	vitamin D %281%2C25- dihydroxyvitamin D3%29 receptor
XM_005677564.1	6	0	3.92	2.89	IVL	involucrin
XM_005680423.1	1	0	-1.03	-0.88	LRP1	low density lipoprotein receptor-related protein 1
XM_005677603.1	6	0	4.44	4.02	SELENBP1	selenium binding protein 1
XM_005680084.1	6	0	9.68	9.39	HOXC13	homeobox C13
XM_005678819.1	6	0	2.47	2.74	LOC102170382	uncharacterized LOC102170382
XM_005677560.1	6	0	5.74	6.04	LOC102183026	cornifin alpha-like%2C transcript variant X1
XM_005684596.1	6	0	1.19	1.21	FOXO3	forkhead box O3
XM_005675845.1	6	0	2.17	2.51	MFSD6	major facilitator superfamily domain containing 6
XM_005691456.1	6	0	3.21	3.2	HSPB8	heat shock 22kDa protein 8
XM_005694210.1	0	0	-1.04	-1.54	CHD3	chromodomain helicase DNA binding protein 3
XM_005691985.1	1	0	-1.57	-0.86	MMP2	matrix metallopeptidase 2 %28gelatinase A%2C 72kDa gelatinase%2C 72kDa type IV collagenase%29
XM_005675868.1	1	0	-1.98	-2.35	COL5A2	collagen%2C type V%2C alpha 2
XM_005694165.1	6	0	2.37	2.56	ZNF750	zinc finger protein 750
XM_005676581.1	6	0	2.8	3.19	TUBA4A	tubulin%2C alpha 4a
XM_005695691.1	6	0	2.57	3.23	ABHD5	abhydrolase domain containing 5
XM_005695818.1	1	0	-1.06	-0.98	ARF4	ADP-ribosylation factor 4
XM_005692857.1	6	0	2.66	2.64	MYH14	myosin%2C heavy chain 14%2C non-muscle
XM_005696276.1	6	0	5.88	6.21	PI16	peptidase inhibitor 16
XM_005695549.1	6	0	2.8	2.77	PLCD1	phospholipase C%2C delta 1
XM_005677960.1	6	0	1.07	1.41	SARS	seryl-tRNA synthetase
XM_005709655.1	6	0	2.82	3	GATA3	GATA binding protein 3
XM_005682993.1	6	0	2.1	2.44	EGR1	early growth response 1
XM_005679935.1	6	0	10.34	9.54	KRT82	keratin 82%2C transcript variant X1
XM_005686934.1	6	0	1.32	1.55	HADHB	hydroxyacyl-CoA dehydrogenase%2F3-ketoacyl-CoA thiolase%2Fenoyl-CoA hydratase %28trifunctional protein%29%2C beta subunit
XM_005687056.1	6	0	1.47	1.82	MXD1	MAX dimerization protein 1
XM_005687834.1	6	0	1.53	1.21	JAG1	jagged 1
XM_005700108.1	6	0	4.06	4.14	PKP3	plakophilin 3
XM_005686225.1	7	0	1.03	1.55	LOC102168547	beta-2-microglobulin-like
XM_005684433.1	1	0	-3.48	-3.07	COL12A1	collagen%2C type XII%2C alpha 1
XM_005678152.1	6	0	3.09	3.43	CLCA2	chloride channel accessory 2
XM_005675123.1	6	0	2.94	3.18	CLDN1	claudin 1
XM_005692620.1	6	0	6.09	6.32	LYPD5	LY6%2FPLAUR domain containing 5
XM_005680171.1	7	0	1.38	2.02	KIF21A	kinesin family member 21A
XM_005676999.1	0	0	-1.04	-1.48	HMGN2	high mobility group nucleosomal binding domain 2
XM_005688668.1	7	0	1.84	2.54	TP53INP2	tumor protein p53 inducible nuclear protein 2
XM_005698601.1	1	0	-0.93	-1	MKI67	antigen identified by monoclonal antibody Ki-67
XM_005692467.1	6	0	1.31	1.39	ESRP2	epithelial splicing regulatory protein 2
XM_005700071.1	6	0	2.06	2.3	CTSD	cathepsin D
XM_005685819.1	6	0	1.64	2.15	GATM	glycine amidinotransferase %28L-arginine:glycine amidinotransferase%29
XM_005687713.1	6	0	3.92	4.69	SLC15A1	solute carrier family 15 %28oligopeptide transporter%29%2C member 1
XM_005685839.1	6	0	0.79	1.03	PYGL	phosphorylase%2C glycogen%2C liver
XM_005696631.1	6	0	3.13	3.34	IER3	immediate early response 3
XM_005688910.1	6	0	2.4	2.36	FAM83H	family with sequence similarity 83%2C member H
XM_005675588.1	6	0	1	1.19	ATP1B3	ATPase%2C Na%2B%2FK%2B transporting%2C beta 3 polypeptide
XM_005676923.1	6	0	6.25	6.71	ABCA12	ATP-binding cassette%2C sub-family A %28ABC1%29%2C member 12
XM_005680096.1	6	0	8.82	7.86	KRT84	keratin 84
XM_005676252.1	6	0	1.25	1.24	DBI	diazepam binding inhibitor %28GABA receptor modulator%2C acyl-CoA binding protein%29
XM_005699799.1	6	0	1.45	1.55	SLC3A2	solute carrier family 3 %28amino acid transporter heavy chain%29%2C member 2
XM_005687610.1	6	0	1.95	1.97	FOXO1	forkhead box O1
XM_005677199.1	6	0	1.27	1.24	F11R	F11 receptor
XM_005683485.1	1	0	-1.41	-1.36	RGMB	RGM domain family%2C member B
XM_005689210.1	6	0	1.05	1.37	NIPAL2	NIPA-like domain containing 2
XM_005681875.1	6	0	1.25	1.34	AFF1	AF4%2FFMR2 family%2C member 1
XM_005700049.1	0	0	-0.76	-1.09	CCND1	cyclin D1
XM_005684643.1	6	0	2.26	2.05	PRDM1	PR domain containing 1%2C with ZNF domain
XM_005698760.1	0	0	-0.55	-1.11	FAT1	FAT atypical cadherin 1
XM_005691571.1	0	0	-0.76	-1.06	MLEC	malectin
XM_005684390.1	7	0	1.03	1.63	KLF4	Kruppel-like factor 4 %28gut%29
XM_005688572.1	6	0	1.24	1.66	FITM2	fat storage-inducing transmembrane protein 2
XM_005684063.1	6	0	4.53	5.03	AQP3	aquaporin 3 %28Gill blood group%29
XM_005695541.1	1	0	-1.53	-1.71	EPM2AIP1	EPM2A %28laforin%29 interacting protein 1
XM_005685972.1	6	0	3.23	3.3	HSPA2	heat shock 70kDa protein 2
XM_005694522.1	6	0	2.82	2.9	GABRP	gamma-aminobutyric acid %28GABA%29 A receptor%2C pi
XM_005680098.1	6	0	11.26	11.07	LOC102183488	keratin%2C type II cuticular Hb1-like
XM_005692256.1	7	0	8.55	13.21	LOC102191166	major allergen I polypeptide chain 1-like
XM_005677229.1	0	0	-0.67	-1.01	PEA15	phosphoprotein enriched in astrocytes 15
XM_005697014.1	6	0	1.01	0.72	DSG3	desmoglein 3
XM_005696642.1	6	0	6.37	6.21	TRIM10	tripartite motif containing 10%2C transcript variant X2
XM_005686240.1	6	0	3.19	3.46	MALL	mal%2C T-cell differentiation protein-like
XM_005677543.1	6	0	3.58	3.69	EFNA3	ephrin-A3
XM_005692311.1	7	0	1.53	2.16	KRTDAP	keratinocyte differentiation-associated protein%2C transcript variant X1
XM_005693822.1	7	0	1.19	2.15	LOC102178766	keratin%2C type I cytoskeletal 19-like%2C transcript variant X2
XM_005692378.1	6	0	1.11	1.43	ECH1	enoyl CoA hydratase 1%2C peroxisomal
XM_005697785.1	6	0	2.79	3.11	CLDN4	claudin 4
XM_005692398.1	6	0	2.06	2.15	ZFP36	ZFP36 ring finger protein
XM_005676099.1	6	0	7.44	7.47	DAPL1	death associated protein-like 1
XM_005695394.1	6	0	3.69	3.51	OTUB2	OTU domain%2C ubiquitin aldehyde binding 2
XM_005683766.1	1	0	-1.38	-1.49	SMARCA2	SWI%2FSNF related%2C matrix associated%2C actin dependent regulator of chromatin%2C subfamily a%2C member 2
XM_005697669.1	6	0	2.41	2.63	YPEL3	yippee-like 3 %28Drosophila%29
XM_005678007.1	6	0	3.14	2.95	CELSR2	cadherin%2C EGF LAG seven-pass G-type receptor 2
XM_005676920.1	6	0	9.94	9.75	PADI3	peptidyl arginine deiminase%2C type III
XM_005679633.1	6	0	1.52	1.73	ARHGEF5	Rho guanine nucleotide exchange factor %28GEF%29 5
XM_005709762.1	7	0	0.76	1.08	PPFIA1	protein tyrosine phosphatase%2C receptor type%2C f polypeptide %28PTPRF%29%2C interacting protein %28liprin%29%2C alpha 1
XM_005699290.1	6	0	2.54	2.12	UNC5B	unc-5 homolog B %28C. elegans%29
XM_005697192.1	6	0	4.04	3.7	MYO5B	myosin VB
XM_005689323.1	6	0	3.38	3.17	CA2	carbonic anhydrase II
XM_005681226.1	0	0	-0.81	-1.29	ATXN10	ataxin 10
XM_005691218.1	6	0	1.7	2	USP38	ubiquitin specific peptidase 38
XM_005686850.1	6	0	1.45	1.66	LBH	limb bud and heart development
XM_005679365.1	6	0	4.49	4.88	NFE2L3	nuclear factor%2C erythroid 2-like 3
XM_005683157.1	6	0	1.74	1.98	ARHGEF37	Rho guanine nucleotide exchange factor %28GEF%29 37
XM_005690873.1	6	0	0.92	1.13	PLEKHM2	pleckstrin homology domain containing%2C family M %28with RUN domain%29 member 2
XM_005685597.1	6	0	3.79	3.97	FMN1	formin 1
XM_005687817.1	6	0	1.64	1.7	SPTLC3	serine palmitoyltransferase%2C long chain base subunit 3
XM_005699630.1	6	0	2.49	2.53	BARX2	BARX homeobox 2
XM_005699523.1	6	0	3.62	4.32	TMEM86A	transmembrane protein 86A
XM_005696191.1	6	0	1.26	1.64	FAM83B	family with sequence similarity 83%2C member B
XM_005688936.1	6	0	2.15	1.96	NDRG1	N-myc downstream regulated 1
XM_005691915.1	6	0	4.43	4.13	SLC7A5	solute carrier family 7 %28amino acid transporter light chain%2C L system%29%2C member 5
XM_005700280.1	6	0	1.57	1.91	SLC25A5	solute carrier family 25 %28mitochondrial carrier%3B adenine nucleotide translocator%29%2C member 5
XM_005697732.1	6	0	1.83	2.02	PRSS8	protease%2C serine%2C 8
XM_005692780.1	6	0	1.88	1.74	PPP1R13L	protein phosphatase 1%2C regulatory subunit 13 like
XM_005698244.1	1	0	-1.67	-1.48	MYOF	myoferlin
XM_005694212.1	6	0	6.25	6.53	ALOX15B	arachidonate 15-lipoxygenase%2C type B
XM_005689421.1	6	0	1.3	1.45	EXPH5	exophilin 5
XM_005699979.1	6	0	2.16	2.28	CDC42BPG	CDC42 binding protein kinase gamma %28DMPK-like%29
XM_005698381.1	7	0	0.83	1.93	PDLIM1	PDZ and LIM domain 1
XM_005693782.1	0	0	-0.63	-1.25	IGFBP4	insulin-like growth factor binding protein 4
XM_005685994.1	6	0	0.98	1.12	ATP6V1D	ATPase%2C H%2B transporting%2C lysosomal 34kDa%2C V1 subunit D
XM_005690709.1	6	0	2.13	2.02	CASZ1	castor zinc finger 1
XM_005680195.1	7	0	1.78	2.84	CPM	carboxypeptidase M
XM_005695048.1	6	0	3.17	3.08	BNC1	basonuclin 1
XM_005688014.1	6	0	5.01	4.49	BAMBI	BMP and activin membrane-bound inhibitor
XM_005677359.1	6	0	2.66	2.82	RAB25	RAB25%2C member RAS oncogene family
XM_005688673.1	6	0	4.03	3.99	FAM83C	family with sequence similarity 83%2C member C
XM_005709702.1	6	0	2.92	2.9	TACSTD2	tumor-associated calcium signal transducer 2
XM_005691105.1	6	0	1.45	1.33	PLXNA2	plexin A2
XM_005690157.1	1	0	-1.13	-1.44	CKAP5	cytoskeleton associated protein 5
XM_005689429.1	6	0	2.64	2.24	PPP2R1B	protein phosphatase 2%2C regulatory subunit A%2C beta
XM_005693561.1	1	0	-2.22	-2.96	MYH10	myosin%2C heavy chain 10%2C non-muscle
XM_005694421.1	6	0	2.34	3.19	ST6GALNAC2	ST6 %28alpha-N-acetyl-neuraminyl-2%2C3-beta-galactosyl-1%2C3%29-N-acetylgalactosaminide alpha-2%2C6-sialyltransferase 2
XM_005677001.1	6	0	2.75	2.57	LOC102180903	uncharacterized LOC102180903
XM_005687250.1	6	0	1.58	1.71	SLC27A4	solute carrier family 27 %28fatty acid transporter%29%2C member 4
XM_005683337.1	1	0	-1.24	-1.41	LOC102191519	uncharacterized LOC102191519
XM_005691036.1	6	0	2.15	1.88	IRF6	interferon regulatory factor 6
XM_005694166.1	6	0	6.89	6.9	TRPV3	transient receptor potential cation channel%2C subfamily V%2C member 3
XM_005681902.1	6	0	2.03	2.1	CPEB2	cytoplasmic polyadenylation element binding protein 2
XM_005676980.1	1	0	-1.77	-1.99	COL16A1	collagen%2C type XVI%2C alpha 1
XM_005679637.1	1	0	-1.07	-1.27	PDIA4	protein disulfide isomerase family A%2C member 4
XM_005676971.1	6	0	2.47	2.67	RNF19B	ring finger protein 19B
XM_005696077.1	1	0	-1.66	-2.03	LRIG1	leucine-rich repeats and immunoglobulin-like domains 1
XM_005697968.1	1	0	-0.88	-1.16	NOMO1	NODAL modulator 1
XM_005696325.1	0	0	-0.93	-1.44	CUL7	cullin 7
XM_005679546.1	7	0	3.5	6.57	TRPV6	transient receptor potential cation channel%2C subfamily V%2C member 6
XM_005698052.1	7	0	0.67	1.1	POR	P450 %28cytochrome%29 oxidoreductase
XM_005699017.1	1	0	-1.4	-1.8	NID1	nidogen 1
XM_005700726.1	1	0	-1.32	-1.78	LOC102184795	melanoma-associated antigen D1-like
XM_005680925.1	6	0	2.13	1.78	LPCAT3	lysophosphatidylcholine acyltransferase 3
XM_005674754.1	1	0	-1.35	-1.05	ADAMTS1	ADAM metallopeptidase with thrombospondin type 1 motif%2C 1
XM_005683462.1	1	0	-1.82	-1.98	PAM	peptidylglycine alpha-amidating monooxygenase
XM_005679207.1	1	0	-1.46	-1.66	FKBP9	FK506 binding protein 9%2C 63 kDa
XM_005688518.1	6	0	1.12	1.49	LOC102178087	myosin regulatory light chain 2%2C smooth muscle major isoform-like
XM_005679222.1	6	0	1.4	1.23	CTTNBP2	cortactin binding protein 2
XM_005681219.1	6	0	1.53	1.42	KIAA0930	KIAA0930 ortholog
XM_005692529.1	6	0	5.31	5.71	LGALS7	lectin%2C galactoside-binding%2C soluble%2C 7
XM_005697232.1	6	0	2.06	2.21	IMPA2	inositol%28myo%29-1%28or 4%29-monophosphatase 2
XM_005709454.1	6	0	4.9	4.73	ATG9B	autophagy related 9B
XM_005691508.1	6	0	1.64	1.58	FZD10	frizzled family receptor 10
XM_005698007.1	1	0	-0.9	-1.07	MAZ	MYC-associated zinc finger protein %28purine-binding transcription factor%29
XM_005692530.1	6	0	5.87	5.68	LGALS7B	lectin%2C galactoside-binding%2C soluble%2C 7B
XM_005700998.1	6	0	1.49	1.73	LOC100860804	spermidine%2Fspermine N-acetyltransferase
XM_005699081.1	6	0	4.99	5.25	EGR2	early growth response 2
XM_005698871.1	6	0	1.94	2.1	RAB11FIP1	RAB11 family interacting protein 1 %28class I%29
XM_005689770.1	7	0	0.79	1.09	SMPD1	sphingomyelin phosphodiesterase 1%2C acid lysosomal
XM_005700032.1	6	0	6.78	6.93	LOC102185156	aldehyde dehydrogenase family 3 member B1-like
XM_005689744.1	6	0	0.84	1.11	TMEM9B	TMEM9 domain family%2C member B
XM_005696159.1	6	0	1.06	1.35	ACAD9	acyl-CoA dehydrogenase family%2C member 9
XM_005692795.1	1	0	-1.18	-1.46	LOC102169697	uncharacterized LOC102169697
XM_005685347.1	6	0	1.13	1.01	AJUBA	ajuba LIM protein
XM_005691581.1	6	0	1.48	1.62	GLTP	glycolipid transfer protein
XM_005693979.1	1	0	-0.89	-1.11	DCAF7	DDB1 and CUL4 associated factor 7
XM_005691949.1	6	0	1.31	1.1	GPT2	glutamic pyruvate transaminase %28alanine aminotransferase%29 2
XM_005679931.1	6	0	1.81	2.13	KRT8	keratin 8
XM_005699318.1	1	0	-1.25	-0.66	LOC102173716	glutamate dehydrogenase 1%2C mitochondrial-like
XM_005679611.1	6	0	1.49	1.44	MKRN1	makorin ring finger protein 1
XM_005692753.1	6	0	6.91	7.43	KLK11	kallikrein-related peptidase 11
XM_005676827.1	0	0	-1.44	-2.16	STMN1	stathmin 1
XM_005693104.1	6	0	1.29	1.33	2015-09-04	septin 4
XM_005685293.1	6	0	2.64	3.09	F2RL1	coagulation factor II %28thrombin%29 receptor-like 1
XM_005685613.1	6	0	2.81	2.91	SPINT1	serine peptidase inhibitor%2C Kunitz type 1
XM_005709606.1	6	0	2.78	2.83	EPB41L4B	erythrocyte membrane protein band 4.1 like 4B
XM_005696526.1	7	0	1.95	3.41	LOC102189356	mamu class II histocompatibility antigen%2C DR alpha chain-like
XM_005679378.1	6	0	1.72	1.85	STK17A	serine%2Fthreonine kinase 17a
XM_005690616.1	6	0	2	2.62	ATP1B1	ATPase%2C Na%2B%2FK%2B transporting%2C beta 1 polypeptide
XM_005679556.1	6	0	2.01	1.9	EPHA1	EPH receptor A1
XM_005681163.1	6	0	1.02	1.12	MICALL1	MICAL-like 1
XM_005692556.1	6	0	1.02	1.26	SHKBP1	SH3KBP1 binding protein 1
XM_005694099.1	0	0	-0.87	-1.47	2015-09-09	septin 9
XM_005696442.1	7	0	1.3	1.78	GCLC	glutamate-cysteine ligase%2C catalytic subunit
XM_005697292.1	0	0	-0.75	-1.31	ZNF532	zinc finger protein 532
XM_005684182.1	6	0	1.18	1.59	NFIL3	nuclear factor%2C interleukin 3 regulated
XM_005686102.1	6	0	1.04	1.14	PRKCH	protein kinase C%2C eta
XM_005677351.1	6	0	2.12	2.37	TMEM79	transmembrane protein 79
XM_005700495.1	6	0	2.81	2.57	ZNF185	zinc finger protein 185 %28LIM domain%29
XM_005695224.1	7	0	0.72	1.26	EGLN3	egl-9 family hypoxia-inducible factor 3
XM_005676686.1	6	0	3.94	4.02	TMEM54	transmembrane protein 54
XM_005695305.1	6	0	3.75	4	CKMT1B	creatine kinase%2C mitochondrial 1B
XM_005698858.1	6	0	1.68	1.68	MFHAS1	malignant fibrous histiocytoma amplified sequence 1
XM_005709566.1	6	0	5.91	6.57	PSAPL1	prosaposin-like 1
XM_005696556.1	6	0	1.01	1.14	PPT2	palmitoyl-protein thioesterase 2
XM_005709413.1	7	0	1.02	1.59	GLRX	glutaredoxin %28thioltransferase%29
XM_005695396.1	6	0	6.13	6.62	LOC102185401	alpha-1-antiproteinase-like
XM_005682121.1	6	0	1.02	0.86	PLVAP	plasmalemma vesicle associated protein
XM_005684204.1	6	0	4.09	4.78	PDLIM2	PDZ and LIM domain 2 %28mystique%29
XM_005691880.1	6	0	7.1	7.71	FA2H	fatty acid 2-hydroxylase
XM_005696477.1	6	0	2.76	2.8	PIM1	pim-1 oncogene
XM_005695706.1	6	0	2.44	2.47	BHLHE40	basic helix-loop-helix family%2C member e40
XM_005698874.1	0	0	-0.88	-1.22	FGFR1	fibroblast growth factor receptor 1
XM_005689673.1	6	0	5.9	6.35	MICALCL	MICAL C-terminal like
XM_005684828.1	7	0	0.58	1.67	CTGF	connective tissue growth factor
XM_005695014.1	7	0	0.85	1.47	HOMER2	homer homolog 2 %28Drosophila%29
XM_005686928.1	6	0	1.53	1.64	SLC35F6	solute carrier family 35%2C member F6
XM_005690967.1	1	0	-1.36	-1.39	RGL1	ral guanine nucleotide dissociation stimulator-like 1
XM_005694305.1	6	0	2.36	1.88	RAPGEFL1	Rap guanine nucleotide exchange factor %28GEF%29-like 1
XM_005674773.1	6	0	2.55	2.71	CXADR	coxsackie virus and adenovirus receptor
XM_005689331.1	0	0	-0.54	-1.06	COL14A1	collagen%2C type XIV%2C alpha 1
XM_005687307.1	1	0	-1.04	-1.03	ABL1	c-abl oncogene 1%2C non-receptor tyrosine kinase
XM_005698992.1	6	0	2.44	2.33	GNG4	guanine nucleotide binding protein %28G protein%29%2C gamma 4
XM_005675440.1	6	0	1.99	2.56	GPR87	G protein-coupled receptor 87
XM_005709356.1	6	0	2.77	3.61	PODN	podocan
XM_005699270.1	6	0	5.95	6.17	MAT1A	methionine adenosyltransferase I%2C alpha
XM_005680418.1	6	0	1.39	1.57	PIP4K2C	phosphatidylinositol-5-phosphate 4-kinase%2C type II%2C gamma
XM_005689136.1	1	0	-1.17	-1.33	EXT1	exostosin glycosyltransferase 1
XM_005677409.1	6	0	1.21	1.05	EFNA1	ephrin-A1
XM_005682398.1	1	0	-1.16	-0.97	INSR	insulin receptor
XM_005694924.1	6	0	1.56	1.55	CERS3	ceramide synthase 3
XM_005676924.1	6	0	3.52	3.33	MREG	melanoregulin
XM_005700037.1	7	0	1.64	2.43	CPT1A	carnitine palmitoyltransferase 1A %28liver%29
XM_005677987.1	0	0	-1.41	-2.24	PTGFRN	prostaglandin F2 receptor inhibitor
XM_005685996.1	6	0	1.43	1.42	PLEK2	pleckstrin 2
XM_005692394.1	6	0	6.65	6.72	NCCRP1	non-specific cytotoxic cell receptor protein 1 homolog %28zebrafish%29
XM_005693221.1	6	0	1.89	2.08	MYO1D	myosin ID
XM_005688961.1	1	0	-1.45	-1.44	SNAI2	snail family zinc finger 2
XM_005697656.1	6	0	3.41	3.96	NUPR1	nuclear protein%2C transcriptional regulator%2C 1
XM_005686573.1	6	0	1.23	1.51	TTC7A	tetratricopeptide repeat domain 7A
XM_005682285.1	6	0	4.25	4.5	JUNB	jun B proto-oncogene
XM_005693662.1	6	0	3.23	3.55	ABCC3	ATP-binding cassette%2C sub-family C %28CFTR%2FMRP%29%2C member 3
XM_005675079.1	6	0	1.31	1.3	PIGZ	phosphatidylinositol glycan anchor biosynthesis%2C class Z
XM_005696263.1	6	0	2.79	3.01	MAPK13	mitogen-activated protein kinase 13
XM_005698605.1	6	0	5.46	5.59	DUSP5	dual specificity phosphatase 5
XM_005689742.1	1	0	-0.97	-1.13	DENND5A	DENN%2FMADD domain containing 5A
XM_005700388.1	0	0	-1.42	-2.01	GPC3	glypican 3
XM_005684231.1	6	0	1.79	1.65	WNK2	WNK lysine deficient protein kinase 2
XM_005696269.1	6	0	2.31	2.13	CDKN1A	cyclin-dependent kinase inhibitor 1A %28p21%2C Cip1%29
XM_005676339.1	7	0	3.15	5.3	LOC102187632	aldehyde oxidase-like
XM_005691193.1	6	0	0.98	1.06	FAM160A1	family with sequence similarity 160%2C member A1
XM_005699299.1	7	0	1.43	2.12	PPIF	peptidylprolyl isomerase F
XM_005678864.1	0	0	-0.84	-1.35	2015-09-02	septin 2
XM_005695593.1	6	0	1.08	1.37	ANO10	anoctamin 10
XM_005689516.1	1	0	-1.37	-1.66	KMT2A	lysine %28K%29-specific methyltransferase 2A
XM_005682552.1	0	0	-0.87	-1.2	PTPRS	protein tyrosine phosphatase%2C receptor type%2C S
XM_005675578.1	1	0	-1.1	-1.11	TSC22D2	TSC22 domain family%2C member 2
XM_005696852.1	6	0	3.24	3.07	ADTRP	androgen-dependent TFPI-regulating protein%2C transcript variant X1
XM_005680266.1	1	0	-0.86	-1.08	CDK4	cyclin-dependent kinase 4
XM_005690209.1	6	0	1.55	1.56	MADD	MAP-kinase activating death domain
XM_005685330.1	6	0	4.3	4.22	TGM1	transglutaminase 1
XM_005694774.1	1	0	-1.59	-1.21	DAB2	Dab%2C mitogen-responsive phosphoprotein%2C homolog 2 %28Drosophila%29
XM_005685619.1	6	0	3.3	3.59	PLA2G4B	phospholipase A2%2C group IVB %28cytosolic%29
XM_005678811.1	6	0	1.93	2.24	SH3D21	SH3 domain containing 21
XM_005679951.1	6	0	1.15	1.33	SMAGP	small cell adhesion glycoprotein
XM_005677546.1	6	0	1.94	2.08	ZBTB7B	zinc finger and BTB domain containing 7B
XM_005677636.1	6	0	2.66	2.76	BNIPL	BCL2%2Fadenovirus E1B 19kD interacting protein like
XM_005675598.1	6	0	3.64	3.69	ESYT3	extended synaptotagmin-like protein 3
XM_005696965.1	7	0	2.53	3.57	LOC102170373	plasminogen activator inhibitor 2-like
XM_005686861.1	6	0	5.99	5.95	PLB1	phospholipase B1
XM_005686437.1	6	0	1.79	2	RNF149	ring finger protein 149
XM_005678551.1	6	0	1.93	1.71	PTCH2	patched 2
XM_005690420.1	6	0	3.4	3.66	C16H1orf116	chromosome 16 open reading frame%2C human C1orf116
XM_005699517.1	7	0	1.22	1.72	HTATIP2	HIV-1 Tat interactive protein 2%2C 30kDa
XM_005697987.1	6	0	1.53	1.89	CHP2	calcineurin-like EF-hand protein 2
XM_005698111.1	1	0	-0.87	-1.17	TNRC18	trinucleotide repeat containing 18
XM_005694596.1	6	0	1.4	1.56	OCLN	occludin
XM_005696627.1	0	0	-0.73	-1.14	MDC1	mediator of DNA-damage checkpoint 1
XM_005687957.1	6	0	1.55	1.85	LOC102175591	serine%2Fthreonine-protein kinase GIN4-like
XM_005692099.1	1	0	-2.4	-2.54	CDH11	cadherin 11%2C type 2%2C OB-cadherin %28osteoblast%29
XM_005684093.1	6	0	7.34	7.07	CCL27	chemokine %28C-C motif%29 ligand 27
XM_005694864.1	1	0	-1.1	-1.38	SEMA5A	sema domain%2C seven thrombospondin repeats %28type 1 and type 1-like%29%2C transmembrane domain %28TM%29 and short cytoplasmic domain%2C %28semaphorin%29 5A
XM_005682235.1	6	0	5.65	6.03	LOC102187582	cytochrome P450 4F22-like
XM_005685008.1	0	0	-0.83	-1.26	THBS2	thrombospondin 2
XM_005680309.1	6	0	1.37	1.15	NAB2	NGFI-A binding protein 2 %28EGR1 binding protein 2%29
XM_005688693.1	0	0	-0.75	-1.16	CHD6	chromodomain helicase DNA binding protein 6
XM_005687649.1	6	0	1.71	1.3	DACH1	dachshund homolog 1 %28Drosophila%29
XM_005692580.1	0	0	-0.62	-1.01	MEGF8	multiple EGF-like-domains 8
XM_005691519.1	6	0	1.43	1.67	HIP1R	huntingtin interacting protein 1 related
XM_005685623.1	6	0	1.22	1.18	TMEM62	transmembrane protein 62
XM_005691097.1	6	0	1.15	0.79	PTPN14	protein tyrosine phosphatase%2C non-receptor type 14
XM_005689655.1	6	0	3.27	3.41	PLEKHA7	pleckstrin homology domain containing%2C family A member 7
XM_005681958.1	6	0	3.03	3.34	CDS1	CDP-diacylglycerol synthase %28phosphatidate cytidylyltransferase%29 1
XM_005687031.1	6	0	1.57	1.28	ID2	inhibitor of DNA binding 2%2C dominant negative helix-loop-helix protein
XM_005693818.1	6	0	8.55	8.85	KRT14	keratin 14%2C transcript variant X1
XM_005677322.1	1	0	-1.79	-2.01	KIRREL	kin of IRRE like %28Drosophila%29
XM_005677034.1	6	0	7.44	7.17	PLA2G2F	phospholipase A2%2C group IIF
XM_005684841.1	6	0	2.86	2.59	MAP7	microtubule-associated protein 7
XM_005686989.1	6	0	1.64	1.64	FAM49A	family with sequence similarity 49%2C member A%2C transcript variant X2
XM_005684031.1	1	0	-1.21	-1.3	DPYSL2	dihydropyrimidinase-like 2
XM_005687246.1	7	0	0.48	1.28	LCN2	lipocalin 2
XM_005709364.1	0	0	-1.12	-2.06	SDC3	syndecan 3
XM_005681913.1	6	0	2.2	2.37	FGFBP1	fibroblast growth factor binding protein 1
XM_005693666.1	6	0	1.09	1.43	ACSF2	acyl-CoA synthetase family member 2
XM_005699555.1	0	0	-0.85	-1.39	VWA5A	von Willebrand factor A domain containing 5A
XM_005687013.1	1	0	-1.48	-1.5	RRM2	ribonucleotide reductase M2
XM_005679583.1	1	0	-2.04	-2.39	FLNC	filamin C%2C gamma
XM_005697103.1	1	0	-1	-1.08	GAREM	GRB2 associated%2C regulator of MAPK1
XM_005681018.1	6	0	2.31	2.73	SCNN1A	sodium channel%2C non-voltage-gated 1 alpha subunit
XM_005677850.1	1	0	-2.3	-2.95	OLFML3	olfactomedin-like 3
XR_311118.1	0	0	-0.8	-1.19	LOC102174900	uncharacterized LOC102174900
XM_005687234.1	6	0	7.82	7.53	LHX2	LIM homeobox 2
XM_005694098.1	6	0	1.58	1.67	SYNGR2	synaptogyrin 2
XM_005691885.1	6	0	0.9	1.06	LOC100861246	GABA%28A%29 receptor-associated protein-like protein 2
XM_005686762.1	6	0	1.88	2.13	CAPG	capping protein %28actin filament%29%2C gelsolin-like
XM_005689947.1	0	0	-0.98	-1.55	INPPL1	inositol polyphosphate phosphatase-like 1
XM_005694579.1	0	0	-1.54	-2.11	SH3PXD2B	SH3 and PX domains 2B
XM_005699726.1	6	0	1.77	2.05	ST14	suppression of tumorigenicity 14 %28colon carcinoma%29
XM_005700260.1	1	0	-1.26	-1.33	LOC102188568	angiomotin-like
XM_005679545.1	6	0	1.7	2	LOC102180375	ephrin type-B receptor 6-like
XM_005680079.1	6	0	2.21	2.15	ZNF385A	zinc finger protein 385A
XM_005709408.1	1	0	-1.14	-0.63	TUBB6	tubulin%2C beta 6 class V
XM_005698945.1	6	0	2.14	1.77	SLC20A2	solute carrier family 20 %28phosphate transporter%29%2C member 2
XM_005696945.1	6	0	3.71	3.85	HSBP1L1	heat shock factor binding protein 1-like 1
XM_005680089.1	6	0	0.87	1.05	SPRYD3	SPRY domain containing 3
XM_005684372.1	6	0	2.37	2.65	SH3YL1	SH3 domain containing%2C Ysc84-like 1 %28S. cerevisiae%29
XM_005695982.1	6	0	0.9	1.17	SLC25A20	solute carrier family 25 %28carnitine%2Facylcarnitine translocase%29%2C member 20
XM_005685060.1	7	0	1.08	1.61	F2RL2	coagulation factor II %28thrombin%29 receptor-like 2
XM_005692076.1	6	0	2.46	2.13	ADCY7	adenylate cyclase 7
XM_005687818.1	1	0	-1.1	-1.31	ISM1	isthmin 1%2C angiogenesis inhibitor
XM_005693608.1	4	0	0.29	1.17	MFAP4	microfibrillar-associated protein 4
XM_005677743.1	6	0	4.47	4.84	ANKRD35	ankyrin repeat domain 35
XM_005699074.1	6	0	3.71	3.82	RET	ret proto-oncogene
XM_005692778.1	6	0	3.01	3.23	KLC3	kinesin light chain 3
XM_005700151.1	6	0	3.35	2.91	XKRX	XK%2C Kell blood group complex subunit-related%2C X-linked
XM_005674953.1	1	0	-1.4	-1.57	ARHGAP31	Rho GTPase activating protein 31
XM_005697991.1	0	0	-0.84	-1.35	GTF3C1	general transcription factor IIIC%2C polypeptide 1%2C alpha 220kDa
XM_005696815.1	6	0	1.75	1.86	LRRC16A	leucine rich repeat containing 16A
XM_005696099.1	6	0	1.26	1.52	MAPKAPK3	mitogen-activated protein kinase-activated protein kinase 3
XM_005686461.1	6	0	1.65	2	SFXN5	sideroflexin 5
XM_005699431.1	6	0	2.85	3.01	RAB38	RAB38%2C member RAS oncogene family
XM_005677703.1	6	0	1.19	0.9	LOC102171395	histone H2B type 2-E-like
XM_005676466.1	6	0	6.8	7.42	LOC102171556	aldehyde oxidase-like
XM_005691682.1	1	0	-0.98	-1.28	GIT2	G protein-coupled receptor kinase interacting ArfGAP 2
XM_005687127.1	0	0	-1.03	-2.01	OLFML2A	olfactomedin-like 2A
XM_005697726.1	6	0	2.36	2.33	PRSS53	protease%2C serine%2C 53
XM_005685862.1	6	0	1.43	1.71	TNFAIP8L3	tumor necrosis factor%2C alpha-induced protein 8-like 3
XM_005694545.1	6	0	4.41	4.14	MSX2	msh homeobox 2
XM_005684394.1	1	0	-1.97	-2.39	SVEP1	sushi%2C von Willebrand factor type A%2C EGF and pentraxin domain containing 1
XM_005684986.1	0	0	-1.7	-2.74	IGF2R	insulin-like growth factor 2 receptor
XM_005675108.1	6	0	4.59	4.2	ATP13A4	ATPase type 13A4
XM_005678560.1	1	0	-0.82	-1.05	B4GALT2	UDP-Gal:betaGlcNAc beta 1%2C4- galactosyltransferase%2C polypeptide 2
XM_005677045.1	6	0	2.04	2.52	IFFO2	intermediate filament family orphan 2
XM_005688954.1	1	0	-1.23	-1.29	MCM4	minichromosome maintenance complex component 4
XM_005678128.1	6	0	2.04	1.98	FRRS1	ferric-chelate reductase 1
XM_005687343.1	6	0	2.1	2.05	AGPAT2	1-acylglycerol-3-phosphate O-acyltransferase 2
XM_005688946.1	6	0	1.15	1.36	LOC102172644	uncharacterized LOC102172644
XM_005695450.1	1	0	-1	-1.27	EVL	Enah%2FVasp-like
XM_005686763.1	0	0	-0.69	-1.1	TCF7L1	transcription factor 7-like 1 %28T-cell specific%2C HMG-box%29
XM_005695383.1	6	0	1.78	1.53	PPIP5K1	diphosphoinositol pentakisphosphate kinase 1
XM_005698188.1	6	0	4.3	4.88	ANKRD22	ankyrin repeat domain 22
XM_005677068.1	6	0	1.68	1.64	EPHA2	EPH receptor A2
XM_005678991.1	6	0	2.29	1.71	SOSTDC1	sclerostin domain containing 1
XM_005683360.1	6	0	2.56	2.76	NIPAL4	NIPA-like domain containing 4
XM_005683812.1	6	0	1.7	1.33	TLE4	transducin-like enhancer of split 4 %28E%28sp1%29 homolog%2C Drosophila%29
XM_005688590.1	5	0	8.91	3.64	SLPI	secretory leukocyte peptidase inhibitor
XM_005690203.1	0	0	-0.93	-2.63	DGKZ	diacylglycerol kinase%2C zeta
XM_005700118.1	1	0	-0.95	-1.1	TSPAN6	tetraspanin 6
XM_005677054.1	6	0	4.42	4.45	LOC102174711	protein-arginine deiminase type-1-like
XM_005690197.1	1	0	-0.9	-1.22	EXT2	exostosin glycosyltransferase 2
XM_005679758.1	6	0	1.88	2.4	PAWR	PRKC%2C apoptosis%2C WT1%2C regulator
XM_005676695.1	1	0	-0.92	-1.13	RBBP4	retinoblastoma binding protein 4
XM_005678965.1	6	0	1.14	1.48	GLCCI1	glucocorticoid induced transcript 1
XM_005700062.1	6	0	1.34	1.45	CARS	cysteinyl-tRNA synthetase
XM_005689281.1	1	0	-1.79	-1.38	ENPP2	ectonucleotide pyrophosphatase%2Fphosphodiesterase 2
XM_005683025.1	6	0	1.12	1.19	CXXC5	CXXC finger protein 5
XM_005709538.1	6	0	1.55	1.69	RHOV	ras homolog family member V
XM_005696660.1	0	0	-0.6	-1.04	EHMT2	euchromatic histone-lysine N-methyltransferase 2
XM_005675232.1	6	0	3.9	4.16	ILDR1	immunoglobulin-like domain containing receptor 1
XM_005696087.1	6	0	1.79	1.69	PRKCD	protein kinase C%2C delta
XM_005686006.1	6	0	4.91	5.33	RDH12	retinol dehydrogenase 12 %28all-trans%2F9-cis%2F11-cis%29
XM_005688178.1	6	0	2.87	3.53	BMP2	bone morphogenetic protein 2
XM_005709596.1	0	0	-0.85	-1.48	CCDC8	coiled-coil domain containing 8
XM_005692765.1	6	0	1.81	1.75	PHLDB3	pleckstrin homology-like domain%2C family B%2C member 3
XM_005675253.1	1	0	-2.75	-2.06	IGF2BP2	insulin-like growth factor 2 mRNA binding protein 2
XM_005677367.1	0	0	-0.77	-1.16	ARHGEF2	Rho%2FRac guanine nucleotide exchange factor %28GEF%29 2
XM_005695550.1	6	0	1.18	1.01	ACAA1	acetyl-CoA acyltransferase 1
XM_005692318.1	6	0	2.45	2.56	LSR	lipolysis stimulated lipoprotein receptor
XM_005694268.1	6	0	5.74	4.93	DLX4	distal-less homeobox 4
XM_005694190.1	6	0	1.69	2.14	ALOX12	arachidonate 12-lipoxygenase
XM_005700093.1	6	0	1.88	2.19	ATGL	adipose triglyceride lipase
XM_005692569.1	6	0	3.13	2.75	DEDD2	death effector domain containing 2
XM_005697966.1	6	0	1.3	1.12	ABCC1	ATP-binding cassette%2C sub-family C %28CFTR%2FMRP%29%2C member 1
XM_005693496.1	6	0	1.26	1.12	KCTD11	potassium channel tetramerization domain containing 11
XM_005682261.1	6	0	0.91	1.08	ZSWIM4	zinc finger%2C SWIM-type containing 4
XM_005695660.1	1	0	-1.02	-1.14	CRTAP	cartilage associated protein
XM_005698058.1	6	0	1.29	1.5	DTX2	deltex homolog 2 %28Drosophila%29
XM_005688855.1	7	0	0.72	1.09	NDUFB9	NADH dehydrogenase %28ubiquinone%29 1 beta subcomplex%2C 9%2C 22kDa
XM_005690371.1	0	0	-1.22	-2.34	FMOD	fibromodulin
XM_005696424.1	7	0	0.73	1.57	LOC102174170	glutathione S-transferase A1-like
XM_005695076.1	6	0	1.51	1.73	STARD5	StAR-related lipid transfer %28START%29 domain containing 5
XM_005680926.1	6	0	1.23	1.44	PTPN6	protein tyrosine phosphatase%2C non-receptor type 6
XM_005688692.1	1	0	-2.51	-3.16	EMILIN3	elastin microfibril interfacer 3
XM_005692308.1	6	0	4.71	5.35	SBSN	suprabasin%2C transcript variant X1
XM_005690411.1	1	0	-0.92	-1.15	SRGAP2	SLIT-ROBO Rho GTPase activating protein 2
XM_005682690.1	1	0	-1.44	-1.67	LMNB1	lamin B1
XM_005682460.1	6	0	2.82	2.96	AP1M2	adaptor-related protein complex 1%2C mu 2 subunit
XR_310880.1	1	0	-1.49	-1.76	LOC102177378	triple functional domain protein-like
XM_005683795.1	1	0	-1.49	-1.19	PRUNE2	prune homolog 2 %28Drosophila%29
XM_005692681.1	6	0	4.85	5.04	SULT2B1	sulfotransferase family%2C cytosolic%2C 2B%2C member 1
XM_005687309.1	7	0	1.85	2.6	LAMC3	laminin%2C gamma 3
XM_005676996.1	6	0	4.15	4.56	FAM46B	family with sequence similarity 46%2C member B
XM_005709736.1	6	0	2.15	2.52	DBNDD2	dysbindin %28dystrobrevin binding protein 1%29 domain containing 2
XM_005697330.1	6	0	1.17	1.09	SNRNP25	small nuclear ribonucleoprotein 25kDa %28U11%2FU12%29
XM_005700321.1	1	0	-1.39	-1.66	GPC4	glypican 4
XM_005697586.1	6	0	1.45	1.51	TMEM159	transmembrane protein 159
XM_005693321.1	1	0	-0.94	-1.19	SMG6	SMG6 nonsense mediated mRNA decay factor
XM_005682194.1	1	0	-1.7	-1.83	COLGALT1	collagen beta%281-O%29galactosyltransferase 1
XM_005680648.1	1	0	-1.74	-1.85	CKAP4	cytoskeleton-associated protein 4
XM_005682757.1	1	0	-1.47	-1.85	DBN1	drebrin 1
XM_005677023.1	0	0	-0.83	-1.33	HSPG2	heparan sulfate proteoglycan 2
XM_005681040.1	6	0	3.05	3.53	B4GALNT3	beta-1%2C4-N-acetyl-galactosaminyl transferase 3
XM_005688433.1	6	0	3.01	2.91	TFAP2C	transcription factor AP-2 gamma %28activating enhancer binding protein 2 gamma%29
XM_005682375.1	1	0	-1.82	-2.01	LDLR	low density lipoprotein receptor
XM_005691893.1	6	0	2.13	2.5	GAN	gigaxonin
XM_005683310.1	6	0	1.31	1.49	PHF15	PHD finger protein 15
XM_005688144.1	6	0	1.16	1.43	PFKP	phosphofructokinase%2C platelet
XM_005684814.1	7	0	1.2	1.69	ABRACL	ABRA C-terminal like
XM_005685695.1	6	0	2.45	3.09	LOC100861305	retinoic acid-related orphan receptor alpha isoform 2
XM_005677111.1	0	0	-0.87	-1.35	ALDH9A1	aldehyde dehydrogenase 9 family%2C member A1
XM_005694361.1	0	0	-0.83	-1.38	MRC2	mannose receptor%2C C type 2
XM_005696891.1	6	0	1.68	1.9	TFAP2A	transcription factor AP-2 alpha %28activating enhancer binding protein 2 alpha%29
XM_005676582.1	6	0	2.53	3.09	LOC102178119	tubulin alpha-1D chain-like
XM_005695855.1	7	0	2.11	3.41	MUSTN1	musculoskeletal%2C embryonic nuclear protein 1
XM_005679299.1	7	0	2.25	3.96	STEAP4	STEAP family member 4%2C transcript variant X1
XM_005697391.1	6	0	1.06	1.16	CLCN7	chloride channel%2C voltage-sensitive 7
XM_005679364.1	2	0	-1.05	-0.42	SKAP2	src kinase associated phosphoprotein 2
XM_005675751.1	6	0	1.81	1.49	C2CD2	C2 calcium-dependent domain containing 2
XM_005686541.1	1	0	-1.95	-2.24	EML4	echinoderm microtubule associated protein like 4
XM_005684454.1	6	0	1.49	1.77	BCKDHB	branched chain keto acid dehydrogenase E1%2C beta polypeptide
XM_005690146.1	1	0	-1.09	-1.12	PHF21A	PHD finger protein 21A
XM_005675789.1	6	0	1.6	1.3	HLCS	holocarboxylase synthetase %28biotin-%28proprionyl-CoA-carboxylase %28ATP-hydrolysing%29%29 ligase%29
XM_005690201.1	6	0	2.07	1.91	GYLTL1B	glycosyltransferase-like 1B
XM_005709671.1	7	0	2.31	3.48	SQRDL	sulfide quinone reductase-like %28yeast%29
XM_005680969.1	1	0	-1.16	-1.25	NCAPD2	non-SMC condensin I complex%2C subunit D2
XM_005684537.1	6	0	1.5	1.46	FAM26E	family with sequence similarity 26%2C member E
XR_310722.1	6	0	1.68	2.02	KRTDAP	keratinocyte differentiation-associated protein%2C transcript variant X2
XM_005676232.1	7	0	2.62	4.7	LRP2	low density lipoprotein receptor-related protein 2
XM_005675942.1	1	0	-1.48	-1.52	WIPF1	WAS%2FWASL interacting protein family%2C member 1
XM_005686441.1	6	0	4.68	5.67	SLC9A2	solute carrier family 9%2C subfamily A %28NHE2%2C cation proton antiporter 2%29%2C member 2
XM_005687223.1	0	0	-0.6	-1.27	ANGPTL2	angiopoietin-like 2
XM_005687385.1	1	0	-2.29	-2.71	COL5A1	collagen%2C type V%2C alpha 1
XM_005700790.1	6	0	1.14	1.09	EBP	emopamil binding protein %28sterol isomerase%29
XM_005683315.1	1	0	-1.6	-2.04	TGFBI	transforming growth factor%2C beta-induced%2C 68kDa
XM_005691275.1	0	0	-1.49	-2.24	FAT4	FAT atypical cadherin 4
XM_005692443.1	0	0	-1.57	-2.24	CMTM3	CKLF-like MARVEL transmembrane domain containing 3
XM_005691879.1	1	0	-1.1	-1.32	GLG1	golgi glycoprotein 1
XM_005690314.1	7	0	1.14	1.64	LOC102181884	factor XIIa inhibitor-like
XM_005684624.1	6	0	1.68	1.84	DCBLD1	discoidin%2C CUB and LCCL domain containing 1
XM_005700019.1	6	0	1.93	2.25	SSH3	slingshot protein phosphatase 3
XM_005693358.1	6	0	3.06	3.44	TLCD1	TLC domain containing 1
XM_005675033.1	6	0	1.26	1.13	DIRC2	disrupted in renal carcinoma 2
XM_005698410.1	0	0	-0.92	-1.53	SUFU	suppressor of fused homolog %28Drosophila%29
XM_005694083.1	6	0	1.06	1.06	C1QTNF1	C1q and tumor necrosis factor related protein 1
XM_005696546.1	1	0	-0.8	-1.04	LPAAT	lysophosphatidic acid acyltransferase
XM_005694493.1	6	0	3.39	3.25	SOX9	SRY %28sex determining region Y%29-box 9
XM_005691840.1	6	0	3.05	2.49	ATP2C2	ATPase%2C Ca%2B%2B transporting%2C type 2C%2C member 2
XM_005698032.1	6	0	3.55	4	ASL	argininosuccinate lyase
XM_005691103.1	6	0	2.29	2.16	LAMB3	laminin%2C beta 3
XM_005695574.1	6	0	0.9	1.11	CTNNB1	catenin %28cadherin-associated protein%29%2C beta 1%2C 88kDa%2C transcript variant X3
XM_005696504.1	1	0	-1.22	-1.53	ZNF318	zinc finger protein 318
XM_005691986.1	7	0	1.29	1.79	CAPNS2	calpain%2C small subunit 2
XM_005674708.1	7	0	1.41	2.31	CLDN8	claudin 8
XM_005690115.1	6	0	1.23	1.06	ABTB2	ankyrin repeat and BTB %28POZ%29 domain containing 2
XM_005680776.1	7	0	1.51	2.34	BHLHE41	basic helix-loop-helix family%2C member e41
XM_005684237.1	5	0	1.38	0.64	S1PR3	sphingosine-1-phosphate receptor 3
XM_005686663.1	1	0	-1.04	-1.01	SLC20A1	solute carrier family 20 %28phosphate transporter%29%2C member 1
XM_005685715.1	6	0	4.94	5.46	AQP9	aquaporin 9
XM_005697930.1	6	0	1.08	1.1	HMOX2	heme oxygenase %28decycling%29 2
XM_005686298.1	6	0	3.98	4.11	IL1RL2	interleukin 1 receptor-like 2
XM_005676793.1	6	0	1.64	2.01	MAP3K6	mitogen-activated protein kinase kinase kinase 6
XM_005691189.1	0	0	-0.62	-1.07	KIAA0922	KIAA0922 ortholog
XM_005681332.1	6	0	2.93	2.8	LOC102188389	DENN domain-containing protein 1C-like
XM_005700107.1	6	0	1.67	2.03	ANO9	anoctamin 9
XM_005682736.1	0	0	-0.53	-1.17	SEMA6A	sema domain%2C transmembrane domain %28TM%29%2C and cytoplasmic domain%2C %28semaphorin%29 6A
XM_005683946.1	6	0	1.13	1.31	SHB	Src homology 2 domain containing adaptor protein B
XM_005683753.1	7	0	1.88	3.36	ALDH1A1	aldehyde dehydrogenase 1 family%2C member A1
XM_005675238.1	1	0	-1.38	-1.85	HEG1	heart development protein with EGF-like domains 1
XM_005691119.1	6	0	1.91	2.01	C16H1orf106	chromosome 16 open reading frame%2C human C1orf106
XM_005682186.1	7	0	2.07	3.01	ARRDC2	arrestin domain containing 2
XM_005687257.1	6	0	1.3	1.36	SH3GLB2	SH3-domain GRB2-like endophilin B2
XM_005676993.1	6	0	2.17	2.28	SYTL1	synaptotagmin-like 1
XM_005678396.1	6	0	0.88	1.07	CPT2	carnitine palmitoyltransferase 2
XR_311032.1	1	0	-1.18	-1.33	LOC102172019	uncharacterized LOC102172019
XM_005685840.1	1	0	-1.03	-1.4	NID2	nidogen 2 %28osteonidogen%29
XM_005694303.1	6	0	3.34	3.04	NR1D1	nuclear receptor subfamily 1%2C group D%2C member 1
XM_005675436.1	1	0	-1.69	-1.93	IGSF10	immunoglobulin superfamily%2C member 10
XM_005683402.1	6	0	1.38	1.85	WWC1	WW and C2 domain containing 1
XM_005697447.1	6	0	3.73	4.12	PRSS27	protease%2C serine 27
XM_005690703.1	0	0	-1.32	-1.92	LOC102168374	procollagen-lysine%2C2-oxoglutarate 5-dioxygenase 1-like
XM_005697149.1	6	0	3.51	3.66	CIDEA	cell death-inducing DFFA-like effector a
XM_005682698.1	0	0	-0.86	-1.53	ZNF608	zinc finger protein 608
XM_005685090.1	1	0	-2.21	-2.82	THBS4	thrombospondin 4
XM_005691901.1	6	0	3.13	3.51	WFDC1	WAP four-disulfide core domain 1
XM_005677814.1	0	0	-1.07	-1.74	IGSF3	immunoglobulin superfamily%2C member 3
XM_005693546.1	2	0	-1.37	-0.31	PER1	period circadian clock 1
XM_005700066.1	0	0	-1.55	-3.37	IGF2	insulin-like growth factor 2 %28somatomedin A%29
XM_005685297.1	0	0	-2.23	-3.46	LHFPL2	lipoma HMGIC fusion partner-like 2
XM_005698180.1	1	0	-1.25	-1.57	PAPSS2	3%27-phosphoadenosine 5%27-phosphosulfate synthase 2
XM_005680573.1	6	0	1.42	1.54	TCP11L2	t-complex 11%2C testis-specific-like 2%2C transcript variant X2
XM_005700204.1	6	0	2.05	2.22	RNF128	ring finger protein 128%2C E3 ubiquitin protein ligase
XM_005682932.1	1	0	-1.1	-1.43	C7H5orf15	chromosome 7 open reading frame%2C human C5orf15
XM_005709553.1	6	0	1.29	1.34	IER2	immediate early response 2
XM_005680078.1	1	0	-1.2	-1.28	ITGA5	integrin%2C alpha 5 %28fibronectin receptor%2C alpha polypeptide%29
XM_005696305.1	2	0	-1.34	-0.65	CCND3	cyclin D3
XM_005694957.1	6	0	1.48	1.49	SLCO3A1	solute carrier organic anion transporter family%2C member 3A1
XM_005690852.1	6	0	1.47	1.42	PRKCZ	protein kinase C%2C zeta
XM_005693386.1	0	0	-0.74	-1.14	SGSM2	small G protein signaling modulator 2
XM_005682449.1	1	0	-1.78	-1.86	COL5A3	collagen%2C type V%2C alpha 3
XM_005709697.1	1	0	-1.49	-1.42	HN1	hematological and neurological expressed 1
XM_005682739.1	7	0	0.56	1.01	NOP16	NOP16 nucleolar protein
XM_005699899.1	6	0	6.52	6.08	OVOL1	ovo-like 1%28Drosophila%29
XM_005693413.1	7	0	0.39	1.32	CTNS	cystinosin%2C lysosomal cystine transporter
XM_005694317.1	1	0	-1.14	-1.35	FKBP10	FK506 binding protein 10%2C 65 kDa
XM_005684138.1	6	0	3.4	3.18	FBP1	fructose-1%2C6-bisphosphatase 1
XM_005680137.1	0	0	-0.68	-1.05	HDAC7	histone deacetylase 7
XM_005681708.1	6	0	0.96	1.06	NOA1	nitric oxide associated 1
XM_005679524.1	1	0	-1.14	-1.12	SLC37A3	solute carrier family 37%2C member 3
XM_005691111.1	1	0	-1.92	-1.9	ASPM	asp %28abnormal spindle%29 homolog%2C microcephaly associated %28Drosophila%29
XM_005684526.1	1	0	-2.82	-2.37	LOC102170698	platelet glycoprotein V-like
XM_005688414.1	0	0	-1.25	-1.74	LSM14B	LSM14B%2C SCD6 homolog B %28S. cerevisiae%29
XM_005691689.1	0	0	-0.64	-1.04	USP30	ubiquitin specific peptidase 30
XM_005685603.1	6	0	1.35	1.28	PAK6	p21 protein %28Cdc42%2FRac%29-activated kinase 6
XM_005691841.1	1	0	-1.34	-1.66	COTL1	coactosin-like 1 %28Dictyostelium%29
XM_005685374.1	1	0	-1.3	-1.61	ARHGEF40	Rho guanine nucleotide exchange factor %28GEF%29 40
XM_005696658.1	6	0	1.92	2.55	LOC102177484	complement C4-like
XM_005677495.1	6	0	5.39	5.19	S100A1	S100 calcium binding protein A1
XM_005688154.1	1	0	-1.12	-1.5	DIP2C	DIP2 disco-interacting protein 2 homolog C %28Drosophila%29
XM_005690875.1	6	0	1.22	1.29	EFHD2	EF-hand domain family%2C member D2
XM_005676949.1	1	0	-1.32	-1.45	IRS1	insulin receptor substrate 1
XM_005687053.1	0	0	-1.53	-2.21	ANTXR1	anthrax toxin receptor 1
XM_005679516.1	6	0	4.93	5.15	ATP6V0A4	ATPase%2C H%2B transporting%2C lysosomal V0 subunit a4
XM_005700919.1	1	0	-1.39	-1.62	TSPAN7	tetraspanin 7
XM_005676251.1	6	0	1.73	2.01	STEAP3	STEAP family member 3%2C metalloreductase
XM_005690766.1	6	0	2.58	2.75	LOC102185202	1-phosphatidylinositol 4%2C5-bisphosphate phosphodiesterase eta-2-like
XM_005697543.1	1	0	-1.39	-1.64	GPRC5B	G protein-coupled receptor%2C family C%2C group 5%2C member B
XM_005697150.1	6	0	1.22	1.51	SPIRE1	spire homolog 1 %28Drosophila%29
XM_005681395.1	1	0	-1.01	-0.88	TSPAN5	tetraspanin 5
XM_005697457.1	6	0	5.17	4.71	CCDC64B	coiled-coil domain containing 64B
XM_005685390.1	1	0	-2.75	-2.39	LOC102173852	brain ribonuclease-like
XM_005678624.1	7	0	0.91	1.28	CTPS1	CTP synthase 1%2C transcript variant X1
XM_005682394.1	6	0	1.15	1.23	ACP5	acid phosphatase 5%2C tartrate resistant
XM_005699611.1	1	0	-2.03	-2.22	CDON	cell adhesion associated%2C oncogene regulated
XM_005675836.1	6	0	1.02	1.38	LOC102173614	glutaredoxin-1-like
XM_005677758.1	0	0	-1.07	-1.82	BCL9	B-cell CLL%2Flymphoma 9
XM_005694451.1	6	0	2.27	2.35	FADS6	fatty acid desaturase 6
XM_005683498.1	1	0	-1	-0.99	EFNA5	ephrin-A5
XM_005709380.1	1	0	-1.04	-1.34	SEPN1	selenoprotein N%2C 1
XM_005709514.1	6	0	1.75	1.72	ELAC2	elaC ribonuclease Z 2
XM_005675794.1	6	0	1.69	1.51	EAF1	ELL associated factor 1
XM_005690613.1	0	0	-0.71	-1.21	DPT	dermatopontin
XM_005709519.1	7	0	0.76	1.26	RNF126	ring finger protein 126
XM_005677718.1	6	0	2.12	1.89	RORC	RAR-related orphan receptor C
XM_005677529.1	1	0	-4.14	-5.56	NES	nestin
XM_005694174.1	6	0	1.88	1.92	SPNS2	spinster homolog 2 %28Drosophila%29
XM_005700104.1	6	0	1.39	1.44	HRAS	Harvey rat sarcoma viral oncogene homolog
XM_005679586.1	1	0	-1.41	-1.93	SMO	smoothened%2C frizzled family receptor
XM_005686722.1	1	0	-1.22	-1.58	GGCX	gamma-glutamyl carboxylase%2C transcript variant X2
XM_005697715.1	1	0	-1.38	-1.67	ZNF629	zinc finger protein 629
XM_005696472.1	6	0	5.68	5.98	PNPLA1	patatin-like phospholipase domain containing 1
XM_005694076.1	1	0	-1.1	-0.69	RNF213	ring finger protein 213
XM_005681042.1	7	0	0.84	1.18	ADIPOR2	adiponectin receptor 2
XM_005693474.1	1	0	-1.03	-1.14	C19H17orf49	chromosome 19 open reading frame%2C human C17orf49
XM_005684389.1	0	0	-1.62	-2.23	ZNF462	zinc finger protein 462
XM_005690098.1	7	0	0.93	1.31	WNT11	wingless-type MMTV integration site family%2C member 11
XM_005688865.1	6	0	2.4	2.65	FBXO32	F-box protein 32
XM_005685908.1	1	0	-1.82	-2.4	C10H14orf37	chromosome 10 open reading frame%2C human C14orf37
XM_005696137.1	6	0	1.4	1.33	CLEC3B	C-type lectin domain family 3%2C member B
XM_005675592.1	1	0	-1.55	-1.56	LOC102189996	uncharacterized LOC102189996
XM_005683349.1	2	0	-1.68	-0.81	LOC100861303	colony stimulating factor receptor
XM_005696663.1	1	0	-0.88	-1.16	DDAH2	dimethylarginine dimethylaminohydrolase 2
XM_005688876.1	0	0	-0.86	-1.29	PRKDC	protein kinase%2C DNA-activated%2C catalytic polypeptide
XM_005675948.1	1	0	-1.16	-1.41	CDCA7	cell division cycle associated 7
XM_005694327.1	6	0	2.43	2.37	WNK4	WNK lysine deficient protein kinase 4
XM_005680080.1	1	0	-1.81	-1.94	HOXC8	homeobox C8
XM_005684917.1	0	0	-2.25	-3.51	AKAP12	A kinase %28PRKA%29 anchor protein 12
XM_005683559.1	1	0	-1	-0.67	SCARA3	scavenger receptor class A%2C member 3%2C transcript variant X1
XM_005677757.1	6	0	1.08	1.29	ACP6	acid phosphatase 6%2C lysophosphatidic
XM_005682307.1	0	0	-0.68	-1.08	LPHN1	latrophilin 1
XM_005694770.1	7	0	2.06	2.87	PTGER4	prostaglandin E receptor 4 %28subtype EP4%29
XM_005675475.1	1	0	-2.13	-2.51	SLC9A9	solute carrier family 9%2C subfamily A %28NHE9%2C cation proton antiporter 9%29%2C member 9
XM_005675092.1	6	0	1.32	1.28	BDH1	3-hydroxybutyrate dehydrogenase%2C type 1
XM_005690508.1	6	0	1.58	2.11	CAPN8	calpain 8
XM_005674848.1	6	0	4.59	4.38	LOC102180153	transmembrane protein 45A-like%2C transcript variant X1
XM_005684804.1	6	0	0.96	1.03	PEX7	peroxisomal biogenesis factor 7
XM_005685327.1	0	0	-1.48	-2.35	NYNRIN	NYN domain and retroviral integrase containing
XM_005688374.1	1	0	-1.01	-1.15	POFUT1	protein O-fucosyltransferase 1%2C transcript variant X1
XM_005691388.1	1	0	-2.07	-2.08	KNTC1	kinetochore associated 1
XM_005698771.1	6	0	0.99	1.32	PDGFRL	platelet-derived growth factor receptor-like
XM_005691759.1	6	0	1.23	1.01	LOC102184363	uncharacterized LOC102184363
XM_005694288.1	6	0	5.68	5.19	SP6	Sp6 transcription factor
XM_005690101.1	1	0	-1.32	-1.04	TSKU	tsukushi%2C small leucine rich proteoglycan
XM_005687402.1	1	0	-1.66	-1.41	LOC102168917	protein diaphanous homolog 3-like
XM_005709579.1	6	0	4.44	4.65	DUSP2	dual specificity phosphatase 2
XM_005683755.1	7	0	1.23	1.68	PPAPDC2	phosphatidic acid phosphatase type 2 domain containing 2
XR_310765.1	1	0	-1.25	-1.11	LOC102188078	uncharacterized LOC102188078
XM_005694436.1	6	0	1.63	1.52	TRIM47	tripartite motif containing 47
XM_005683770.1	1	0	-1.44	-1.77	PGM5	phosphoglucomutase 5
XM_005700376.1	1	0	-1.1	-1.07	ELF4	E74-like factor 4 %28ets domain transcription factor%29
XM_005693639.1	7	0	0.79	1.11	NME2	NME%2FNM23 nucleoside diphosphate kinase 2%2C transcript variant X1
XM_005689629.1	0	0	-0.69	-1.09	BACE1	beta-site APP-cleaving enzyme 1
XM_005709361.1	1	0	-1.5	-1.7	LMNB2	lamin B2
XR_310284.1	6	0	1.05	1.06	LOC102171425	uncharacterized LOC102171425
XM_005694969.1	1	0	-1.15	-1.18	FANCI	Fanconi anemia%2C complementation group I
XM_005694054.1	6	0	1.22	1.51	SIRT7	sirtuin 7
XM_005677198.1	6	0	2.42	2.46	TSTD1	thiosulfate sulfurtransferase %28rhodanese%29-like domain containing 1
XM_005690440.1	6	0	3.42	3.32	SLC45A3	solute carrier family 45%2C member 3
XM_005686239.1	1	0	-1.05	-1.19	BUB1	BUB1 mitotic checkpoint serine%2Fthreonine kinase
XM_005694261.1	6	0	3.9	3.55	EPN3	epsin 3
XM_005692825.1	6	0	2.33	2.26	DBP	D site of albumin promoter %28albumin D-box%29 binding protein
XM_005678340.1	6	0	1.65	1.89	LOC102190572	cytochrome P450 2J2-like
XM_005680034.1	6	0	1.73	1.88	SLC48A1	solute carrier family 48 %28heme transporter%29%2C member 1
XM_005696026.1	6	0	1.71	2.07	ALS2CL	ALS2 C-terminal like
XM_005682006.1	0	0	-0.73	-1.21	WHSC1	Wolf-Hirschhorn syndrome candidate 1
XM_005690830.1	1	0	-1.31	-1.59	PHF13	PHD finger protein 13
XM_005689745.1	0	0	-0.79	-1.24	ST5	suppression of tumorigenicity 5
XM_005700749.1	6	0	1.59	1.53	PRICKLE3	prickle homolog 3 %28Drosophila%29
XM_005699993.1	6	0	5.19	4.83	KCNK7	potassium channel%2C subfamily K%2C member 7
XM_005694109.1	6	0	1.69	1.92	RHBDF2	rhomboid 5 homolog 2 %28Drosophila%29
XM_005686126.1	6	0	1.16	1.13	LTBP2	latent transforming growth factor beta binding protein 2
XM_005693502.1	0	0	-0.83	-1.56	FGF11	fibroblast growth factor 11
XM_005695114.1	1	0	-1.26	-1.59	LOC102188259	pseudopodium-enriched atypical kinase 1-like
XM_005696318.1	6	0	5.06	4.76	GNMT	glycine N-methyltransferase
XM_005675541.1	6	0	1.55	1.3	EPHB1	EPH receptor B1
XM_005709637.1	1	0	-2.7	-2.56	VGLL3	vestigial like 3 %28Drosophila%29
XM_005678777.1	1	0	-1.41	-1.67	MAST2	microtubule associated serine%2Fthreonine kinase 2
XM_005700401.1	0	0	-0.87	-1.32	BCORL1	BCL6 corepressor-like 1
XM_005682008.1	6	0	1.61	1.27	FGFR3	fibroblast growth factor receptor 3
XM_005694191.1	6	0	2.49	2.68	SLC16A11	solute carrier family 16%2C member 11
XM_005676946.1	6	0	6.07	6.1	SGPP2	sphingosine-1-phosphate phosphatase 2
XM_005700892.1	0	0	-1.59	-2.4	FGD1	FYVE%2C RhoGEF and PH domain containing 1
XM_005697224.1	6	0	1.51	1.4	SOGA2	SOGA family member 2
XM_005682661.1	7	0	1.19	1.63	MFSD12	major facilitator superfamily domain containing 12
XM_005684279.1	0	0	-0.65	-1.08	IKBKAP	inhibitor of kappa light polypeptide gene enhancer in B-cells%2C kinase complex-associated protein%2C transcript variant X1
XM_005675603.1	6	0	1.07	0.98	SLCO2A1	solute carrier organic anion transporter family%2C member 2A1
XM_005683256.1	6	0	2.75	2.91	ATP10B	ATPase%2C class V%2C type 10B
XM_005698387.1	6	0	4.35	4.57	SFRP5	secreted frizzled-related protein 5
XM_005695475.1	6	0	1.19	1	JAG2	jagged 2
XM_005696940.1	6	0	2.78	2.78	LOC102184018	glyoxylate reductase%2Fhydroxypyruvate reductase-like
XM_005675776.1	1	0	-1.26	-1.72	POFUT2	protein O-fucosyltransferase 2
XM_005689294.1	6	0	2.61	2.8	MAL2	mal%2C T-cell differentiation protein 2
XM_005684506.1	6	0	2.39	2.32	FABP7	fatty acid binding protein 7%2C brain
XM_005682079.1	2	0	-1.01	-0.49	GMIP	GEM interacting protein
XM_005693468.1	6	0	1.81	2.15	CXCL16	chemokine %28C-X-C motif%29 ligand 16
XM_005684221.1	6	0	3.82	4.17	RASEF	RAS and EF-hand domain containing
XM_005698643.1	6	0	2.01	1.62	PTPRE	protein tyrosine phosphatase%2C receptor type%2C E
XM_005679558.1	1	0	-1.68	-2.22	LOC102184403	protein FAM115A-like
XM_005697084.1	1	0	-1.46	-1.91	ZNF516	zinc finger protein 516
XM_005699317.1	7	0	2.29	3.48	ADIRF	adipogenesis regulatory factor
XM_005675667.1	6	0	1.4	1.5	ADARB1	adenosine deaminase%2C RNA-specific%2C B1
XM_005688941.1	0	0	-1.1	-1.74	ASAP1	ArfGAP with SH3 domain%2C ankyrin repeat and PH domain 1
XM_005692687.1	6	0	3.63	3.09	FUT1	fucosyltransferase 1 %28galactoside 2-alpha-L-fucosyltransferase%2C H blood group%29
XM_005690671.1	0	0	-0.73	-1	CLCN6	chloride channel%2C voltage-sensitive 6
XM_005694193.1	0	0	-0.64	-1.2	DVL2	dishevelled segment polarity protein 2
XM_005680762.1	6	0	1.95	1.76	KCTD17	potassium channel tetramerization domain containing 17
XM_005690430.1	6	0	2.14	2.01	PLEKHA6	pleckstrin homology domain containing%2C family A member 6
XM_005674683.1	1	0	-0.9	-1.19	IL10RB	interleukin 10 receptor%2C beta
XM_005688425.1	6	0	4.98	4.31	APCDD1L	adenomatosis polyposis coli down-regulated 1-like
XM_005691683.1	6	0	1.33	1.24	TRPV4	transient receptor potential cation channel%2C subfamily V%2C member 4
XM_005694094.1	1	0	-1.12	-1.1	BIRC5	baculoviral IAP repeat containing 5
XM_005696924.1	6	0	2.54	2.31	SLC22A23	solute carrier family 22%2C member 23
XM_005709683.1	0	0	-1.08	-1.51	SHC2	SHC %28Src homology 2 domain containing%29 transforming protein 2
XM_005685036.1	0	0	-0.59	-1.44	EPB41L4A	erythrocyte membrane protein band 4.1 like 4A
XM_005677667.1	7	0	1.25	2.54	ECM1	extracellular matrix protein 1%2C transcript variant X1
XM_005690358.1	1	0	-1.03	-1.12	NCAPD3	non-SMC condensin II complex%2C subunit D3
XM_005685620.1	7	0	1.05	1.5	SPTBN5	spectrin%2C beta%2C non-erythrocytic 5
XM_005682678.1	7	0	0.62	1.18	SLC22A5	solute carrier family 22 %28organic cation%2Fcarnitine transporter%29%2C member 5
XM_005680651.1	6	0	1.3	1.04	LOC102168239	ankyrin repeat and BTB%2FPOZ domain-containing protein BTBD11-like
XM_005692078.1	6	0	2.3	2.74	NOD2	nucleotide-binding oligomerization domain containing 2
XM_005694272.1	1	0	-1.73	-1.64	ZNF652	zinc finger protein 652
XM_005684406.1	0	0	-1.65	-2.75	COL27A1	collagen%2C type XXVII%2C alpha 1
XM_005694531.1	1	0	-1.21	-1.21	ERGIC1	endoplasmic reticulum-golgi intermediate compartment %28ERGIC%29 1%2C transcript variant X2
XM_005696988.1	1	0	-1.37	-1.55	MAPRE2	microtubule-associated protein%2C RP%2FEB family%2C member 2
XM_005687159.1	1	0	-1.08	-1.06	STXBP1	syntaxin binding protein 1
XM_005691838.1	0	0	-0.85	-1.28	HSDL1	hydroxysteroid dehydrogenase like 1
XM_005687771.1	6	0	2.03	1.82	GGACT	gamma-glutamylamine cyclotransferase
XM_005709593.1	1	0	-0.85	-1.07	ARL10	ADP-ribosylation factor-like 10
XM_005684308.1	6	0	1.5	1.59	PTBP3	polypyrimidine tract binding protein 3%2C transcript variant X3
XM_005691999.1	6	0	7.03	6.29	MT2A	metallothionein 2A
XM_005676647.1	1	0	-1.82	-1.85	PID1	phosphotyrosine interaction domain containing 1
XM_005689554.1	0	0	-0.68	-1.16	OAF	OAF homolog %28Drosophila%29
XM_005688237.1	0	0	-1	-1.76	C13H20orf194	chromosome 13 open reading frame%2C human C20orf194
XM_005692425.1	0	0	-0.7	-1.07	EGLN2	egl-9 family hypoxia-inducible factor 2
XM_005685932.1	0	0	-1.11	-2.07	DACT1	dishevelled-binding antagonist of beta-catenin 1
XM_005681060.1	6	0	3.77	3.33	GCAT	glycine C-acetyltransferase
XM_005686941.1	0	0	-1.15	-1.93	DNMT3A	DNA %28cytosine-5-%29-methyltransferase 3 alpha
XR_310616.1	4	0	0.27	1.59	LOC102168845	uncharacterized LOC102168845
XM_005682559.1	0	0	-0.64	-1.02	LOC102172140	hepatoma-derived growth factor-related protein 2-like
XM_005696960.1	1	0	-2.86	-3.35	DSEL	dermatan sulfate epimerase-like
XM_005699913.1	0	0	-0.46	-1.05	PACS1	phosphofurin acidic cluster sorting protein 1
XM_005692828.1	6	0	4.68	4.07	HSD17B14	hydroxysteroid %2817-beta%29 dehydrogenase 14
XM_005695443.1	6	0	2.09	2	CEP170B	centrosomal protein 170B
XM_005679607.1	6	0	0.94	1.03	HIPK2	homeodomain interacting protein kinase 2
XM_005688520.1	0	0	-0.78	-1.5	TGIF2	TGFB-induced factor homeobox 2
XM_005693257.1	1	0	-1.23	-1.43	SPAG5	sperm associated antigen 5
XM_005709591.1	6	0	2.05	2.29	ABHD3	abhydrolase domain containing 3
XM_005691331.1	1	0	-0.94	-1.2	POLE	polymerase %28DNA directed%29%2C epsilon%2C catalytic subunit
XM_005698031.1	1	0	-1.4	-1.19	LOC102174355	beta-glucuronidase-like
XM_005699376.1	6	0	1.86	2	SYT15	synaptotagmin XV
XM_005684236.1	1	0	-1.02	-1.07	CKS2	CDC28 protein kinase regulatory subunit 2
XM_005697906.1	0	0	-1.5	-2.24	FSCN1	fascin homolog 1%2C actin-bundling protein %28Strongylocentrotus purpuratus%29
XM_005697474.1	1	0	-1.08	-1.24	SLX4	SLX4 structure-specific endonuclease subunit
XM_005684421.1	1	0	-1.68	-2.05	PXDN	peroxidasin homolog %28Drosophila%29
XM_005690412.1	6	0	1.37	1.7	RASSF5	Ras association %28RalGDS%2FAF-6%29 domain family member 5
XM_005694405.1	0	0	-1.08	-2.18	TBC1D16	TBC1 domain family%2C member 16
XM_005692471.1	1	0	-1.17	-1.02	SNTB2	syntrophin%2C beta 2 %28dystrophin-associated protein A1%2C 59kDa%2C basic component 2%29
XM_005688645.1	1	0	-1.67	-1.49	PTGIS	prostaglandin I2 %28prostacyclin%29 synthase
XM_005694416.1	6	0	1.18	1.22	TMC6	transmembrane channel-like 6
XM_005680897.1	0	0	-0.5	-1.34	SLC2A3	solute carrier family 2 %28facilitated glucose transporter%29%2C member 3
XM_005699901.1	1	0	-0.96	-1.09	EFEMP2	EGF containing fibulin-like extracellular matrix protein 2
XM_005690367.1	7	0	0.96	1.58	CHI3L1	chitinase 3-like 1 %28cartilage glycoprotein-39%29%2C transcript variant X1
XM_005697064.1	1	0	-1.46	-1.48	TYMS	thymidylate synthetase
XM_005694428.1	0	0	-1.28	-1.92	RNF157	ring finger protein 157
XM_005692416.1	6	0	1.72	1.87	SERTAD1	SERTA domain containing 1
XM_005709499.1	0	0	-0.44	-1.01	TBC1D5	TBC1 domain family%2C member 5
XM_005683031.1	6	0	2.74	3	CYSTM1	cysteine-rich transmembrane module containing 1%2C transcript variant X3
XM_005697097.1	6	0	3.01	3.23	MOCOS	molybdenum cofactor sulfurase
XM_005709589.1	0	0	-0.5	-1.07	RGS12	regulator of G-protein signaling 12
XM_005688030.1	1	0	-1.81	-2.16	SEC61A2	Sec61 alpha 2 subunit %28S. cerevisiae%29
XM_005690407.1	6	0	1.33	1.16	LOC102173110	ras-related protein Rab-7b-like
XM_005681186.1	0	0	-0.74	-1.39	ZC3H7B	zinc finger CCCH-type containing 7B
XM_005697860.1	6	0	1.86	1.83	LOC102191011	cytochrome P450 3A24-like
XM_005695670.1	6	0	1.68	1.88	DLEC1	deleted in lung and esophageal cancer 1
XM_005682191.1	6	0	3.6	3.3	FCHO1	FCH domain only 1
XM_005686431.1	6	0	1.62	1.98	KIAA1211L	KIAA1211-like ortholog
XM_005685401.1	6	0	1.32	1.36	LOC102176691	purine nucleoside phosphorylase-like
XM_005687318.1	1	0	-0.85	-1.16	RALGDS	ral guanine nucleotide dissociation stimulator
XM_005695172.1	7	0	0.85	1.29	MCEE	methylmalonyl CoA epimerase
XM_005685030.1	0	0	-1.5	-3.18	NREP	neuronal regeneration related protein
XM_005682657.1	6	0	2.16	2.16	TJP3	tight junction protein 3
XM_005698614.1	1	0	-2.46	-2.45	ATRNL1	attractin-like 1
XM_005684412.1	1	0	-1.02	-0.73	PHF19	PHD finger protein 19
XM_005695792.1	6	0	1.1	1.15	ABHD6	abhydrolase domain containing 6
XM_005676205.1	1	0	-2.35	-2.96	NCKAP5	NCK-associated protein 5
XM_005682177.1	7	0	2.4	3.37	CRLF1	cytokine receptor-like factor 1
XM_005682476.1	6	0	1.1	0.7	PNPLA6	patatin-like phospholipase domain containing 6
XM_005682667.1	6	0	2.37	2.71	GNA15	guanine nucleotide binding protein %28G protein%29%2C alpha 15 %28Gq class%29
XM_005694970.1	6	0	5.88	6.08	RHCG	Rh family%2C C glycoprotein
XM_005694869.1	1	0	-0.85	-1.12	ADCY2	adenylate cyclase 2 %28brain%29
XM_005685775.1	6	0	3.33	3.06	GLDN	gliomedin
XM_005696466.1	6	0	1.44	1.26	DEF6	differentially expressed in FDCP 6 homolog %28mouse%29
XM_005691451.1	1	0	-1.93	-1.73	CIT	citron %28rho-interacting%2C serine%2Fthreonine kinase 21%29
XM_005709690.1	1	0	-1.42	-1.64	CHST2	carbohydrate %28N-acetylglucosamine-6-O%29 sulfotransferase 2
XM_005683042.1	7	0	0.73	2.09	CD14	CD14 molecule
XM_005697042.1	6	0	1.93	1.75	TTC39C	tetratricopeptide repeat domain 39C
XM_005689660.1	0	0	-1.9	-3.04	SPON1	spondin 1%2C extracellular matrix protein
XM_005690019.1	1	0	-3.95	-4.04	FIBIN	fin bud initiation factor homolog %28zebrafish%29
XM_005678559.1	6	0	1.17	1.58	SLC6A9	solute carrier family 6 %28neurotransmitter transporter%2C glycine%29%2C member 9
XM_005709560.1	1	0	-1.25	-1.3	UBE2C	ubiquitin-conjugating enzyme E2C
XM_005686136.1	1	0	-1.04	-1.21	LOC102188774	probable ergosterol biosynthetic protein 28-like
XM_005689950.1	6	0	2.73	2.67	STARD10	StAR-related lipid transfer %28START%29 domain containing 10
XM_005709681.1	0	0	-0.51	-1	AHDC1	AT hook%2C DNA binding motif%2C containing 1
XM_005685983.1	6	0	1.55	1.69	RAB15	RAB15%2C member RAS oncogene family
XM_005687088.1	6	0	1.95	1.61	MYCN	v-myc avian myelocytomatosis viral oncogene neuroblastoma derived homolog
XM_005688087.1	3	0	-0.21	-1.45	CD93	CD93 molecule
XM_005694528.1	0	0	-1.23	-1.75	UBTD2	ubiquitin domain containing 2
XM_005691085.1	1	0	-1.35	-1.35	TOR3A	torsin family 3%2C member A
XM_005694434.1	0	0	-0.73	-1.27	FBF1	Fas %28TNFRSF6%29 binding factor 1
XM_005697126.1	1	0	-3.03	-3.28	ARHGAP28	Rho GTPase activating protein 28
XM_005679703.1	1	0	-1.25	-0.79	NCAPG2	non-SMC condensin II complex%2C subunit G2
XM_005680769.1	6	0	1.47	1.47	PKP2	plakophilin 2
XM_005690112.1	6	0	3.19	3.11	DEPDC7	DEP domain containing 7
XM_005680343.1	1	0	-1.16	-1.33	TIMELESS	timeless circadian clock
XM_005709484.1	0	0	-0.94	-1.4	RAI1	retinoic acid induced 1
XM_005683170.1	7	0	1.8	3	CD74	CD74 molecule%2C major histocompatibility complex%2C class II invariant chain%2C transcript variant X1
XM_005684401.1	6	0	2.58	2.5	SLC46A2	solute carrier family 46%2C member 2
XM_005681807.1	0	0	-0.78	-2.57	FRAS1	Fraser syndrome 1
XM_005684352.1	1	0	-4.71	-4.9	TNC	tenascin C
XM_005681970.1	7	0	1.88	2.99	BST1	bone marrow stromal cell antigen 1
XM_005686385.1	6	0	3.59	3.82	TGFA	transforming growth factor%2C alpha
XM_005697982.1	5	0	1.84	0.76	HS3ST2	heparan sulfate %28glucosamine%29 3-O-sulfotransferase 2
XM_005694316.1	1	0	-1.39	-1.31	LEPREL4	leprecan-like 4
XM_005693580.1	6	0	4.89	4.79	LOC102182254	putative transmembrane protein LOC100289255-like
XM_005693196.1	6	0	1.23	1.3	MYO19	myosin XIX
XM_005690120.1	0	0	-1.23	-1.71	LDLRAD3	low density lipoprotein receptor class A domain containing 3
XM_005684823.1	6	0	2.74	2.73	NT5E	5%27-nucleotidase%2C ecto %28CD73%29
XM_005693180.1	1	0	-1.02	-0.52	LOC102185031	uncharacterized LOC102185031
XM_005679142.1	6	0	1.44	1.13	NRCAM	neuronal cell adhesion molecule
XM_005694264.1	1	0	-1.02	-1.32	XYLT2	xylosyltransferase II
XM_005679948.1	6	0	2.7	2.42	GALNT6	UDP-N-acetyl-alpha-D-galactosamine:polypeptide N-acetylgalactosaminyltransferase 6 %28GalNAc-T6%29
XM_005684998.1	6	0	1.96	2.21	LOC102175856	uncharacterized LOC102175856
XM_005689784.1	0	0	-1.91	-2.79	DCHS1	dachsous 1 %28Drosophila%29
XM_005686808.1	1	0	-1.66	-1.71	MEIS1	Meis homeobox 1
XM_005682308.1	1	0	-1.06	-0.78	ASF1B	anti-silencing function 1B histone chaperone
XM_005697318.1	6	0	3.13	3.36	SERPINB2	serpin peptidase inhibitor%2C clade B %28ovalbumin%29%2C member 2
XM_005709730.1	1	0	-1.11	-1.13	RASSF1	Ras association %28RalGDS%2FAF-6%29 domain family member 1
XM_005677025.1	6	0	2	1.7	RAP1GAP	RAP1 GTPase activating protein
XM_005688681.1	2	0	-1.37	-0.56	SAMHD1	SAM domain and HD domain 1
XM_005695084.1	1	0	-1.98	-2.18	TBC1D2B	TBC1 domain family%2C member 2B
XM_005682602.1	6	0	2.15	2.1	GADD45B	growth arrest and DNA-damage-inducible%2C beta
XM_005682477.1	6	0	3.74	3.62	CAMSAP3	calmodulin regulated spectrin-associated protein family%2C member 3
XM_005709650.1	1	0	-1.16	-1.1	C21H15orf39	chromosome 21 open reading frame%2C human C15orf39
XM_005692061.1	6	0	2.6	2.99	SPIRE2	spire-type actin nucleation factor 2
XM_005677418.1	1	0	-1.09	-1.14	CKS1B	CDC28 protein kinase regulatory subunit 1B
XM_005680240.1	6	0	1.25	1.23	TBC1D30	TBC1 domain family%2C member 30
XM_005684007.1	0	0	-1.4	-2.45	LOXL2	lysyl oxidase-like 2
XM_005694875.1	1	0	-1.59	-1.79	BASP1	brain abundant%2C membrane attached signal protein 1
XM_005675586.1	7	0	3.65	5.32	PCOLCE2	procollagen C-endopeptidase enhancer 2
XM_005696168.1	6	0	1.38	1.37	MGLL	monoglyceride lipase
XM_005686352.1	6	0	2.57	2.46	ACTG2	actin%2C gamma 2%2C smooth muscle%2C enteric%2C transcript variant X1
XM_005687353.1	6	0	1.72	1.61	SARDH	sarcosine dehydrogenase
XM_005696742.1	7	0	0.75	1.22	LOC102182181	histone H2B type 1-like
XM_005700653.1	1	0	-1.67	-2.02	RGAG4	retrotransposon gag domain containing 4
XM_005684983.1	0	0	-2.55	-3.74	FNDC1	fibronectin type III domain containing 1
XM_005694296.1	6	0	1.7	1.71	PLXDC1	plexin domain containing 1
XM_005686462.1	7	0	2.07	2.9	LOC102187233	uncharacterized LOC102187233
XM_005689319.1	1	0	-1.89	-2.34	RUNX1T1	runt-related transcription factor 1%3B translocated to%2C 1 %28cyclin D-related%29
XM_005696524.1	0	0	-1.01	-1.41	TRAM2	translocation associated membrane protein 2
XM_005699722.1	1	0	-1.38	-1.72	JAM3	junctional adhesion molecule 3
XM_005682465.1	1	0	-0.9	-1.06	CARM1	coactivator-associated arginine methyltransferase 1
XM_005680905.1	1	0	-1.53	-1.97	PHC1	polyhomeotic homolog 1 %28Drosophila%29
XM_005685622.1	1	0	-0.84	-1.09	CDAN1	codanin 1
XM_005685140.1	1	0	-0.91	-1.16	SMAD3	SMAD family member 3%2C transcript variant X1
XM_005693429.1	6	0	1.11	1.22	TXNDC17	thioredoxin domain containing 17
XM_005686883.1	1	0	-0.89	-1	FNDC4	fibronectin type III domain containing 4
XM_005697691.1	1	0	-1.04	-1.24	KIF22	kinesin family member 22
XM_005688917.1	7	0	1.09	1.52	NAPRT1	nicotinate phosphoribosyltransferase domain containing 1
XM_005684997.1	6	0	4.76	4.92	UNC93A	unc-93 homolog A %28C. elegans%29
XM_005698388.1	6	0	6.55	6.46	GOLGA7B	golgin A7 family%2C member B
XM_005692524.1	6	0	1.14	1.03	KCNK6	potassium channel%2C subfamily K%2C member 6
XM_005680389.1	1	0	-1.18	-1.46	LOC102177414	transmembrane protein 198-like
XM_005695933.1	6	0	3.59	2.81	SLC38A3	solute carrier family 38%2C member 3
XM_005688338.1	0	0	-1.31	-1.86	ZCCHC3	zinc finger%2C CCHC domain containing 3
XM_005679249.1	6	0	2.47	3.05	GGCT	gamma-glutamylcyclotransferase%2C transcript variant X1
XM_005698282.1	1	0	-1.36	-1.7	ARHGAP19	Rho GTPase activating protein 19
XM_005684393.1	6	0	3.76	3.85	C8H9orf152	chromosome 8 open reading frame%2C human C9orf152
XM_005687064.1	6	0	2.11	2.24	KRTCAP3	keratinocyte associated protein 3
XM_005674747.1	0	0	-1.44	-2.2	HUNK	hormonally up-regulated Neu-associated kinase
XM_005695668.1	1	0	-2.15	-2.8	ITGA9	integrin%2C alpha 9
XM_005685151.1	1	0	-1.56	-1.81	CORO2B	coronin%2C actin binding protein%2C 2B
XM_005698535.1	1	0	-1.06	-1.01	GRK5	G protein-coupled receptor kinase 5
XM_005681678.1	5	0	4.72	1.73	SOD3	superoxide dismutase 3%2C extracellular
XM_005688950.1	1	0	-1.05	-1.19	WDYHV1	WDYHV motif containing 1
XM_005687733.1	1	0	-1.53	-1.74	KDELC1	KDEL %28Lys-Asp-Glu-Leu%29 containing 1
XM_005699250.1	6	0	1.27	1.15	LOC102171217	40S ribosomal protein S24-like%2C transcript variant X3
XM_005681198.1	7	0	0.66	1.16	TSPO	translocator protein %2818kDa%29
XM_005700008.1	7	0	0.46	1.21	RIN1	Ras and Rab interactor 1
XM_005692775.1	6	0	5.14	5.37	NKPD1	NTPase%2C KAP family P-loop domain containing 1
XM_005698870.1	0	0	-1.1	-2.14	GPR124	G protein-coupled receptor 124
XM_005691731.1	0	0	-0.47	-1.08	PATZ1	POZ %28BTB%29 and AT hook containing zinc finger 1
XM_005684404.1	6	0	3.15	3.57	BSPRY	B-box and SPRY domain containing
XM_005698036.1	0	0	-0.71	-1.54	GTF2IRD1	GTF2I repeat domain containing 1
XM_005696156.1	7	0	0.33	1.02	FBLN2	fibulin 2
XM_005700869.1	7	0	0.77	1.12	HSD17B10	hydroxysteroid %2817-beta%29 dehydrogenase 10%2C transcript variant X1
XM_005685007.1	1	0	-2.47	-2.86	SMOC2	SPARC related modular calcium binding 2
XM_005694314.1	6	0	5.01	4.82	KRT16	keratin 16
XM_005694330.1	1	0	-1.5	-1.48	RND2	Rho family GTPase 2
XM_005692819.1	1	0	-1.7	-1.74	EMP3	epithelial membrane protein 3
XM_005697795.1	1	0	-1.4	-1.26	HIP1	huntingtin interacting protein 1
XM_005696621.1	1	0	-0.98	-1.01	PRR3	proline rich 3
XM_005693897.1	6	0	1.83	2.02	ARL4D	ADP-ribosylation factor-like 4D
XM_005677908.1	6	0	2.1	1.94	DENND2D	DENN%2FMADD domain containing 2D%2C transcript variant X1
XM_005700014.1	6	0	1.48	1.76	LOC102179641	putative uncharacterized protein C11orf80-like
XM_005689045.1	6	0	2.57	1.85	SLCO5A1	solute carrier organic anion transporter family%2C member 5A1
XM_005687596.1	1	0	-1.27	-1.13	PHF11	PHD finger protein 11
XM_005697088.1	7	0	0.69	1.93	CNDP1	carnosine dipeptidase 1 %28metallopeptidase M20 family%29
XM_005691832.1	6	0	2.04	1.74	HSD17B2	hydroxysteroid %2817-beta%29 dehydrogenase 2
XM_005709392.1	1	0	-1.54	-2.01	OBSL1	obscurin-like 1
XM_005687690.1	1	0	-1.61	-2	SPRY2	sprouty homolog 2 %28Drosophila%29
XM_005692332.1	0	0	-0.79	-1.12	GRAMD1A	GRAM domain containing 1A
XM_005709460.1	1	0	-2.18	-2.08	KIF23	kinesin family member 23
XM_005678727.1	6	0	2.99	3.4	GJB3	gap junction protein%2C beta 3%2C 31kDa
XM_005700937.1	6	0	1.2	1.02	MID1IP1	MID1 interacting protein 1
XM_005678307.1	6	0	2.03	1.59	DNAJC6	DnaJ %28Hsp40%29 homolog%2C subfamily C%2C member 6
XM_005694948.1	0	0	-1.45	-2.1	ADAMTS17	ADAM metallopeptidase with thrombospondin type 1 motif%2C 17
XM_005696629.1	1	0	-1.66	-1.92	LOC102168953	tubulin beta-5 chain-like%2C transcript variant X2
XM_005678556.1	1	0	-0.83	-1.04	ERI3	ERI1 exoribonuclease family member 3
XM_005686180.1	1	0	-1.16	-1.44	ANGEL1	angel homolog 1 %28Drosophila%29
XM_005694400.1	6	0	1.51	1.32	LOC102184092	serine%2Fthreonine-protein kinase LMTK1-like
XM_005709629.1	6	0	1.09	1.18	LRRC24	leucine rich repeat containing 24
XM_005691895.1	6	0	1.83	1.97	PLCG2	phospholipase C%2C gamma 2 %28phosphatidylinositol-specific%29
XM_005694439.1	0	0	-0.57	-1.03	UNK	unkempt homolog %28Drosophila%29
XM_005694397.1	0	0	-0.68	-1.27	BAHCC1	BAH domain and coiled-coil containing 1
XM_005678599.1	1	0	-1.37	-1.5	LEPRE1	leucine proline-enriched proteoglycan %28leprecan%29 1
XM_005697123.1	1	0	-2.43	-2.41	EMILIN2	elastin microfibril interfacer 2
XR_310868.1	1	0	-1.24	-1.08	LOC102169134	tubulin%2C alpha 1a pseudogene
XM_005687248.1	1	0	-1.18	-1.3	DNM1	dynamin 1
XM_005693347.1	6	0	3.99	3.83	RAB11FIP4	RAB11 family interacting protein 4 %28class II%29
XM_005693181.1	1	0	-1.35	-0.83	CUEDC1	CUE domain containing 1
XM_005692786.1	0	0	-0.6	-1.33	SIX5	SIX homeobox 5
XM_005698934.1	1	0	-1.17	-0.89	UBE2E2	ubiquitin-conjugating enzyme E2E 2
XM_005686111.1	1	0	-1.92	-2.49	GALNT16	UDP-N-acetyl-alpha-D-galactosamine:polypeptide N-acetylgalactosaminyltransferase 16
XM_005698247.1	6	0	4.01	3.29	SLC35G1	solute carrier family 35%2C member G1
XM_005694202.1	0	0	-0.86	-1.24	NLGN2	neuroligin 2
XM_005698582.1	1	0	-1.6	-1.55	BUB3	BUB3 mitotic checkpoint protein%2C transcript variant X1
XM_005679593.1	1	0	-2.58	-2.49	PLXNA4	plexin A4
XM_005690119.1	1	0	-1.57	-1.52	TRIM44	tripartite motif containing 44
XM_005709542.1	6	0	2.94	3.08	NUAK2	NUAK family%2C SNF1-like kinase%2C 2
XM_005694489.1	0	0	-1.16	-1.71	SDK2	sidekick cell adhesion molecule 2
XM_005688889.1	1	0	-0.89	-1.02	TONSL	tonsoku-like%2C DNA repair protein
XM_005678926.1	6	0	2.1	2.48	C4H7orf57	chromosome 4 open reading frame%2C human C7orf57
XM_005696676.1	0	0	-1.19	-2.14	ATAT1	alpha tubulin acetyltransferase 1
XM_005682351.1	1	0	-1.36	-1.7	S1PR2	sphingosine-1-phosphate receptor 2
XM_005695542.1	1	0	-1.57	-1.98	TRANK1	tetratricopeptide repeat and ankyrin repeat containing 1
XM_005691679.1	7	0	0.65	1.03	ACADS	acyl-CoA dehydrogenase%2C C-2 to C-3 short chain
XM_005691215.1	0	0	-0.62	-1.19	ZNF827	zinc finger protein 827
XM_005693499.1	6	0	2.24	2.65	TNK1	tyrosine kinase%2C non-receptor%2C 1
XM_005688689.1	6	0	1.05	1.13	MAFB	v-maf avian musculoaponeurotic fibrosarcoma oncogene homolog B
XM_005694578.1	1	0	-1.27	-1.26	STK10	serine%2Fthreonine kinase 10
XM_005690437.1	6	0	1.68	1.51	KLHDC8A	kelch domain containing 8A
XM_005676934.1	6	0	2.41	1.79	WNT10A	wingless-type MMTV integration site family%2C member 10A
XM_005680938.1	1	0	-0.94	-1.17	CDCA3	cell division cycle associated 3
XM_005686135.1	6	0	2.13	2.18	LOC102188506	feline leukemia virus subgroup C receptor-related protein 2-like
XM_005684353.1	1	0	-1.15	-0.97	PAPPA	pregnancy-associated plasma protein A%2C pappalysin 1
XM_005684135.1	1	0	-1.19	-1.27	DAPK1	death-associated protein kinase 1
XM_005700149.1	1	0	-1.4	-1.26	CENPI	centromere protein I
XM_005700933.1	6	0	2.52	3.04	MAOB	monoamine oxidase B
XM_005677755.1	0	0	-1.09	-2.08	GJA5	gap junction protein%2C alpha 5%2C 40kDa
XM_005699920.1	0	0	-0.57	-1.19	B3GNT1	UDP-GlcNAc:betaGal beta-1%2C3-N-acetylglucosaminyltransferase 1
XM_005686141.1	0	0	-0.68	-1.78	TGFB3	transforming growth factor%2C beta 3
XM_005690870.1	6	0	3.5	3.55	SAMD11	sterile alpha motif domain containing 11
XM_005690103.1	0	0	-0.93	-2.06	CAPN5	calpain 5
XM_005696095.1	7	0	0.47	1.11	ACY1	aminoacylase 1
XM_005676997.1	6	0	2.04	2.09	C2H1orf172	chromosome 2 open reading frame%2C human C1orf172
XM_005688728.1	0	0	-1.62	-2.25	PREX1	phosphatidylinositol-3%2C4%2C5-trisphosphate-dependent Rac exchange factor 1
XM_005685046.1	1	0	-1.59	-1.87	SIMC1	SUMO-interacting motifs containing 1
XM_005694991.1	1	0	-0.82	-1.1	FES	feline sarcoma oncogene
XM_005685314.1	1	0	-1.54	-1.65	ITGA11	integrin%2C alpha 11
XM_005679911.1	1	0	-1.34	-1.59	ESPL1	extra spindle pole bodies homolog 1 %28S. cerevisiae%29
XM_005687044.1	7	0	1.82	2.79	PTGS1	prostaglandin-endoperoxide synthase 1 %28prostaglandin G%2FH synthase and cyclooxygenase%29
XM_005687618.1	1	0	-1.52	-1.87	B3GALTL	beta 1%2C3-galactosyltransferase-like
XM_005691343.1	6	0	1.65	1.72	SCARB1	scavenger receptor class B%2C member 1%2C transcript variant X1
XM_005677854.1	1	0	-1.11	-1.02	DCLRE1B	DNA cross-link repair 1B
XM_005700849.1	7	0	1.12	2.09	SYN1	synapsin I
XM_005699289.1	0	0	-1.27	-2.24	LOC102183762	uncharacterized LOC102183762
XM_005685997.1	6	0	4.44	4.87	TMEM229B	transmembrane protein 229B
XM_005696123.1	6	0	1.27	1.02	KLHL18	kelch-like family member 18
XM_005678564.1	1	0	-1.16	-1.14	ST3GAL3	ST3 beta-galactoside alpha-2%2C3-sialyltransferase 3
XM_005692095.1	3	0	-0.51	-2.27	MMP15	matrix metallopeptidase 15 %28membrane-inserted%29
XM_005692553.1	6	0	2.37	1.83	PRX	periaxin
XM_005699294.1	0	0	-1.06	-1.71	FUT11	fucosyltransferase 11 %28alpha %281%2C3%29 fucosyltransferase%29
XM_005681207.1	6	0	3.28	3.37	ARHGAP8	Rho GTPase activating protein 8
XM_005692725.1	7	0	1.25	1.84	PRRG2	proline rich Gla %28G-carboxyglutamic acid%29 2
XM_005700712.1	0	0	-0.61	-1.1	LOC100861240	ectodysplasin-A transcript variant 1
XM_005699962.1	1	0	-1.05	-1.4	C29H11orf84	chromosome 29 open reading frame%2C human C11orf84
XM_005699380.1	1	0	-1.98	-2.65	VSTM4	V-set and transmembrane domain containing 4
XM_005691754.1	6	0	2.95	2.39	SUSD2	sushi domain containing 2
XM_005690831.1	6	0	0.93	1.02	KLHL21	kelch-like family member 21
XM_005709587.1	0	0	-1.59	-2.5	AUTS2	autism susceptibility candidate 2
XM_005685708.1	1	0	-1.02	-1.12	CCNB2	cyclin B2
XM_005677959.1	1	0	-0.99	-1.29	PSRC1	proline%2Fserine-rich coiled-coil 1
XM_005694765.1	0	0	-1.89	-2.76	LOC102185312	chondroitin sulfate proteoglycan 4-like
XM_005700027.1	6	0	0.9	1.19	TMEM134	transmembrane protein 134
XM_005695686.1	0	0	-0.98	-1.47	ZBTB47	zinc finger and BTB domain containing 47
XM_005690825.1	6	0	1.29	1.43	SLC25A33	solute carrier family 25 %28pyrimidine nucleotide carrier%29%2C member 33
XM_005675230.1	6	0	2.65	3.25	GP5	glycoprotein V %28platelet%29
XM_005688539.1	0	0	-0.52	-1.07	SRC	v-src avian sarcoma %28Schmidt-Ruppin A-2%29 viral oncogene homolog
XM_005681961.1	6	0	4.94	4.43	MSX1	msh homeobox 1
XM_005684354.1	7	0	0.43	1.59	TLR4	toll-like receptor 4
XM_005678418.1	1	0	-1.44	-1.34	ORC1	origin recognition complex%2C subunit 1
XM_005676260.1	6	0	1.15	0.78	EPB41L5	erythrocyte membrane protein band 4.1 like 5%2C transcript variant X2
XM_005694878.1	0	0	-1.31	-1.98	FBXL7	F-box and leucine-rich repeat protein 7
XM_005687852.1	6	0	1.81	1.92	PROSER2	proline and serine-rich protein 2
XM_005688615.1	6	0	1.03	1.4	CTSA	cathepsin A%2C transcript variant X1
XM_005700430.1	1	0	-1.96	-2.23	LOC102174371	fibroblast growth factor 13-like
XM_005685276.1	1	0	-1.08	-1.1	SLC7A7	solute carrier family 7 %28amino acid transporter light chain%2C y%2BL system%29%2C member 7
XM_005690174.1	6	0	4.25	4.32	FAM180B	family with sequence similarity 180%2C member B
XM_005698033.1	0	0	-2.47	-3.43	WBSCR17	Williams-Beuren syndrome chromosome region 17
XM_005687636.1	1	0	-2.43	-2.93	SACS	spastic ataxia of Charlevoix-Saguenay %28sacsin%29
XM_005678002.1	1	0	-1.02	-0.57	CSF1	colony stimulating factor 1 %28macrophage%29
XM_005697020.1	6	0	2.33	2.54	DSC3	desmocollin 3%2C transcript variant X1
XM_005680413.1	6	0	1.24	1.5	PPM1H	protein phosphatase%2C Mg2%2B%2FMn2%2B dependent%2C 1H
XM_005696226.1	1	0	-1.16	-1.01	KIFC1	kinesin family member C1
XM_005687350.1	6	0	1.18	1.21	ADAMTSL2	ADAMTS-like 2
XM_005699998.1	6	0	1.47	1.28	AP5B1	adaptor-related protein complex 5%2C beta 1 subunit
XM_005679612.1	1	0	-1.89	-2.13	DENND2A	DENN%2FMADD domain containing 2A
XM_005678679.1	1	0	-1.21	-1.24	CDCA8	cell division cycle associated 8
XM_005696946.1	6	0	1.13	1.14	PQLC1	PQ loop repeat containing 1
XM_005695656.1	6	0	1.85	1.69	CMTM8	CKLF-like MARVEL transmembrane domain containing 8
XM_005690599.1	6	0	4.41	4.8	C16H1orf95	chromosome 16 open reading frame%2C human C1orf95
XM_005691707.1	0	0	-1.49	-2.09	TTC28	tetratricopeptide repeat domain 28
XM_005697110.1	1	0	-1.36	-1.76	ZNF521	zinc finger protein 521
XM_005675706.1	1	0	-0.92	-1.16	ERG	v-ets avian erythroblastosis virus E26 oncogene homolog
XM_005681126.1	1	0	-1.66	-2.23	FAM109B	family with sequence similarity 109%2C member B
XM_005683171.1	7	0	1.51	2.31	CD74	CD74 molecule%2C major histocompatibility complex%2C class II invariant chain%2C transcript variant X2
XM_005692082.1	1	0	-1.64	-1.32	IRX5	iroquois homeobox 5
XM_005699882.1	6	0	1.62	1.46	TM7SF2	transmembrane 7 superfamily member 2%2C transcript variant X1
XM_005684970.1	0	0	-0.72	-1.17	LOC102188948	monofunctional C1-tetrahydrofolate synthase%2C mitochondrial-like
XM_005678357.1	1	0	-1.41	-1.25	PPAP2B	phosphatidic acid phosphatase type 2B%2C transcript variant X1
XM_005682810.1	0	0	-0.72	-1.38	ZNF346	zinc finger protein 346
XM_005688698.1	6	0	2.92	3.04	WISP2	WNT1 inducible signaling pathway protein 2
XM_005694448.1	1	0	-1	-1.32	CDR2L	cerebellar degeneration-related protein 2-like
XM_005678786.1	0	0	-0.29	-1.05	TIE1	tyrosine kinase with immunoglobulin-like and EGF-like domains 1
XM_005677404.1	1	0	-1.78	-1.81	THBS3	thrombospondin 3
XM_005694425.1	6	0	2.09	2.49	SPHK1	sphingosine kinase 1
XM_005691887.1	6	0	2.02	1.26	ADAMTS18	ADAM metallopeptidase with thrombospondin type 1 motif%2C 18
XM_005689106.1	1	0	-2.7	-3.64	CRISPLD1	cysteine-rich secretory protein LCCL domain containing 1
XM_005685207.1	6	0	2.7	3.09	CIDEB	cell death-inducing DFFA-like effector b
XM_005700101.1	6	0	3.16	2.95	RASSF7	Ras association %28RalGDS%2FAF-6%29 domain family %28N-terminal%29 member 7
XM_005688050.1	0	0	-1.35	-2.01	FAM171A1	family with sequence similarity 171%2C member A1
XM_005694971.1	1	0	-1.4	-1.19	TICRR	TOPBP1-interacting checkpoint and replication regulator
XM_005691855.1	6	0	1.24	1.47	FBXO31	F-box protein 31
XM_005685163.1	1	0	-1.48	-0.89	LARP6	La ribonucleoprotein domain family%2C member 6
XM_005695592.1	6	0	2.97	3.69	LOC102173339	5-beta-cholestane-3-alpha%2C7-alpha-diol 12-alpha-hydroxylase-like
XR_310663.1	6	0	1.89	2.34	LOC102181329	uncharacterized LOC102181329
XM_005691225.1	0	0	-1.69	-2.68	RNF150	ring finger protein 150
XM_005676322.1	6	0	1.31	1.73	INHBB	inhibin%2C beta B
XM_005693557.1	1	0	-1.45	-1.56	KRBA2	KRAB-A domain containing 2
XM_005695388.1	1	0	-1.45	-1.96	RIN3	Ras and Rab interactor 3
XM_005681980.1	0	0	-0.76	-1.19	AFAP1	actin filament associated protein 1
XM_005675095.1	1	0	-1.59	-1.64	XXYLT1	xyloside xylosyltransferase 1
XM_005709442.1	1	0	-1.08	-1.35	NUMBL	numb homolog %28Drosophila%29-like
XM_005675400.1	2	0	-3.64	-1.01	PTX3	pentraxin 3%2C long
XM_005694291.1	0	0	-0.76	-1.35	TBKBP1	TBK1 binding protein 1
XM_005688474.1	6	0	1.44	1.87	AHCY	adenosylhomocysteinase%2C transcript variant X1
XM_005690834.1	6	0	1.76	1.85	ESPN	espin
XM_005694917.1	6	0	1.38	1.82	ATP10A	ATPase%2C class V%2C type 10A
XM_005681243.1	6	0	2.07	2.46	PANX2	pannexin 2
XM_005677238.1	7	0	0.85	1.26	TAGLN2	transgelin 2%2C transcript variant X2
XM_005690754.1	1	0	-1.21	-1.41	KCNAB2	potassium voltage-gated channel%2C shaker-related subfamily%2C beta member 2
XM_005697384.1	6	0	6.95	6.91	LOC102177855	tryptase-2-like
XM_005694390.1	6	0	1.1	0.94	SLC25A10	solute carrier family 25 %28mitochondrial carrier%3B dicarboxylate transporter%29%2C member 10
XM_005694162.1	6	0	2.52	3.06	CHAD	chondroadherin
XM_005698149.1	0	0	-1.25	-1.82	ZWINT	ZW10 interacting kinetochore protein
XM_005691724.1	6	0	5.62	6.37	SEC14L4	SEC14-like 4 %28S. cerevisiae%29
XM_005683654.1	0	0	-1.08	-2.25	FREM1	FRAS1 related extracellular matrix 1
XM_005700081.1	6	0	1.45	1.56	SIGIRR	single immunoglobulin and toll-interleukin 1 receptor %28TIR%29 domain
XM_005692840.1	6	0	3.3	2.51	CCDC155	coiled-coil domain containing 155
XM_005709557.1	6	0	2.34	2.6	DENND1C	DENN%2FMADD domain containing 1C
XM_005699134.1	0	0	-1.06	-1.79	TSPAN15	tetraspanin 15
XM_005688094.1	1	0	-2.1	-2.42	ENTPD6	ectonucleoside triphosphate diphosphohydrolase 6 %28putative%29
XM_005693944.1	1	0	-1.09	-1.16	KIF18B	kinesin family member 18B
XM_005700735.1	1	0	-1.17	-1.05	USP27X	ubiquitin specific peptidase 27%2C X-linked
XM_005681640.1	6	0	4.71	5.21	HOPX	HOP homeobox%2C transcript variant X1
XM_005690722.1	6	0	2.26	2.46	CTNNBIP1	catenin%2C beta interacting protein 1%2C transcript variant X1
XR_310506.1	0	0	-1.31	-1.79	LOC102189880	uncharacterized LOC102189880%2C transcript variant X1
XM_005676672.1	1	0	-1.2	-1.12	PDE6D	phosphodiesterase 6D%2C cGMP-specific%2C rod%2C delta
XM_005709481.1	0	0	-1.1	-1.77	TSPYL5	TSPY-like 5
XM_005680939.1	0	0	-0.79	-1.97	GNB3	guanine nucleotide binding protein %28G protein%29%2C beta polypeptide 3
XM_005690843.1	6	0	3.21	3.53	ARHGEF16	Rho guanine nucleotide exchange factor %28GEF%29 16
XM_005698620.1	1	0	-2.2	-1.77	EMX2	empty spiracles homeobox 2
XM_005693776.1	1	0	-1.85	-1.57	CDC6	cell division cycle 6
XM_005690328.1	0	0	-1.35	-1.94	LOC102190715	E3 ubiquitin-protein ligase DTX1-like
XM_005684442.1	6	0	2.92	3.72	HTR1B	5-hydroxytryptamine %28serotonin%29 receptor 1B%2C G protein-coupled
XM_005682234.1	6	0	1.12	1.43	LOC102187311	cytochrome P450 4F6-like
XM_005680429.1	1	0	-1.66	-2.03	IKZF4	IKAROS family zinc finger 4 %28Eos%29
XM_005679010.1	1	0	-2.52	-2.94	TWIST1	twist basic helix-loop-helix transcription factor 1
XM_005693610.1	6	0	4.76	4.94	SLC5A10	solute carrier family 5 %28sodium%2Fsugar cotransporter%29%2C member 10
XM_005688882.1	1	0	-1.1	-0.94	RECQL4	RecQ protein-like 4
XM_005678330.1	0	0	-0.97	-2.45	KANK4	KN motif and ankyrin repeat domains 4
XM_005685344.1	0	0	-1.39	-2.21	SLC22A17	solute carrier family 22%2C member 17
XM_005681033.1	1	0	-1.47	-1.68	FOXM1	forkhead box M1
XM_005691206.1	0	0	-0.63	-1.14	LOC102176152	zinc finger protein 513-like
XM_005689951.1	1	0	-0.89	-1.09	ATG16L2	autophagy related 16-like 2 %28S. cerevisiae%29
XM_005709535.1	6	0	1.4	1.05	SMAD6	SMAD family member 6
XM_005688725.1	1	0	-1.34	-1.68	SLC2A10	solute carrier family 2 %28facilitated glucose transporter%29%2C member 10
XM_005709532.1	1	0	-1.17	-1.1	GTSE1	G-2 and S-phase expressed 1
XM_005695125.1	1	0	-2.27	-2.65	SCAMP5	secretory carrier membrane protein 5
XR_309804.1	6	0	2.83	2.69	LOC102172108	uncharacterized LOC102172108
XM_005678988.1	4	0	0.4	1.69	AGMO	alkylglycerol monooxygenase
XM_005685402.1	6	0	1.55	1.77	LOC102176963	purine nucleoside phosphorylase-like
XM_005694192.1	0	0	-0.86	-2.02	DLG4	discs%2C large homolog 4 %28Drosophila%29
XM_005697095.1	0	0	-0.5	-1.06	TPGS2	tubulin polyglutamylase complex subunit 2
XM_005694185.1	6	0	0.91	1.17	CHRNE	cholinergic receptor%2C nicotinic%2C epsilon %28muscle%29
XM_005687069.1	1	0	-2.54	-3.19	EMILIN1	elastin microfibril interfacer 1
XM_005699636.1	4	0	0.18	2.55	TMEM45B	transmembrane protein 45B
XM_005678755.1	6	0	1.96	2.62	MLPH	melanophilin
XM_005683669.1	2	0	-1.21	-0.37	PTPLAD2	protein tyrosine phosphatase-like A domain containing 2
XM_005679372.1	0	0	-0.85	-1.53	NACAD	NAC alpha domain containing
XM_005700521.1	7	0	0.65	1.09	TREX2	three prime repair exonuclease 2
XM_005691818.1	5	0	3.23	1.5	VAT1L	vesicle amine transport 1-like
XM_005683906.1	6	0	2.54	3	CORO2A	coronin%2C actin binding protein%2C 2A
XM_005694363.1	7	0	1.49	3.11	ACE	angiotensin I converting enzyme
XM_005690145.1	1	0	-0.97	-1.12	SLC35C1	solute carrier family 35 %28GDP-fucose transporter%29%2C member C1
XM_005700485.1	0	0	-2.04	-3.89	PRRG3	proline rich Gla %28G-carboxyglutamic acid%29 3 %28transmembrane%29
XM_005683677.1	1	0	-0.89	-1.09	TMEM261	transmembrane protein 261
XM_005693860.1	0	0	-2.35	-3.76	CNTNAP1	contactin associated protein 1
XM_005697444.1	1	0	-1.25	-1.42	CCNF	cyclin F
XM_005675467.1	1	0	-2.64	-2.13	AGTR1	angiotensin II receptor%2C type 1
XR_310235.1	7	0	2.08	3.27	CHRNA2	cholinergic receptor%2C nicotinic%2C alpha 2 %28neuronal%29%2C transcript variant X2
XM_005687978.1	1	0	-3.14	-4.19	CUBN	cubilin %28intrinsic factor-cobalamin receptor%29
XM_005692793.1	7	0	2.61	4.22	PGLYRP1	peptidoglycan recognition protein 1
XM_005694297.1	6	0	2.56	3.01	STAC2	SH3 and cysteine rich domain 2
XM_005699990.1	1	0	-1.18	-1.48	CDC42EP2	CDC42 effector protein %28Rho GTPase binding%29 2
XM_005681853.1	1	0	-1.51	-1.3	AGPAT9	1-acylglycerol-3-phosphate O-acyltransferase 9
XM_005680976.1	6	0	2.43	2.6	PLEKHG6	pleckstrin homology domain containing%2C family G %28with RhoGef domain%29 member 6
XM_005677678.1	6	0	3.94	4	MRPS21	mitochondrial ribosomal protein S21%2C transcript variant X2
XM_005695942.1	1	0	-1.29	-1.75	FAM212A	family with sequence similarity 212%2C member A
XM_005696497.1	0	0	-1.75	-2.45	TRERF1	transcriptional regulating factor 1
XM_005684068.1	1	0	-1.37	-1.46	KIF24	kinesin family member 24
XM_005683634.1	7	0	0.53	1.63	PLIN2	perilipin 2%2C transcript variant X2
XM_005687488.1	5	0	1.28	-0.26	FREM2	FRAS1 related extracellular matrix protein 2
XM_005678403.1	0	0	-1.25	-1.88	GPX7	glutathione peroxidase 7
XM_005688746.1	6	0	3.89	3.7	LOC102178921	1%2C25-dihydroxyvitamin D%283%29 24-hydroxylase%2C mitochondrial-like
XM_005689672.1	6	0	3.53	3.61	MICAL2	microtubule associated monooxygenase%2C calponin and LIM domain containing 2%2C transcript variant X2
XM_005678510.1	1	0	-1.23	-1.3	RAD54L	RAD54-like %28S. cerevisiae%29
XM_005695117.1	1	0	-1.84	-1.87	LINGO1	leucine rich repeat and Ig domain containing 1
XM_005698321.1	6	0	2.64	2.09	LOC102179909	uncharacterized LOC102179909
XM_005686846.1	0	0	-0.53	-1.08	EHD3	EH-domain containing 3
XM_005698551.1	6	0	2.12	2.24	LOC102170663	protein phosphatase Slingshot homolog 3-like
XM_005674973.1	1	0	-2.35	-2.1	PVRL3	poliovirus receptor-related 3
XM_005679511.1	0	0	-1.27	-1.95	CREB3L2	cAMP responsive element binding protein 3-like 2
XM_005697125.1	1	0	-1.96	-2.54	EPB41L3	erythrocyte membrane protein band 4.1-like 3
XM_005687767.1	7	0	0.63	1.07	CLYBL	citrate lyase beta like
XM_005685770.1	1	0	-2.46	-2.56	LYSMD2	LysM%2C putative peptidoglycan-binding%2C domain containing 2
XM_005691016.1	1	0	-1.94	-1.98	DTL	denticleless E3 ubiquitin protein ligase homolog %28Drosophila%29
XR_310430.1	7	0	0.95	2.02	LOC102174669	uncharacterized LOC102174669
XM_005683604.1	6	0	3.83	3.49	CDKN2B	cyclin-dependent kinase inhibitor 2B %28p15%2C inhibits CDK4%29
XM_005697667.1	6	0	2.41	2.26	GDPD3	glycerophosphodiester phosphodiesterase domain containing 3%2C transcript variant X1
XM_005687151.1	0	0	-1.04	-1.6	ZBTB34	zinc finger and BTB domain containing 34
XM_005691115.1	1	0	-1.78	-1.56	KIF14	kinesin family member 14
XM_005685609.1	0	0	-1.08	-1.85	CHST14	carbohydrate %28N-acetylgalactosamine 4-0%29 sulfotransferase 14
XM_005675039.1	6	0	2.04	1.34	MYLK	myosin light chain kinase%2C transcript variant X1
XM_005694472.1	1	0	-0.92	-1.04	MAP2K6	mitogen-activated protein kinase kinase 6
XM_005695837.1	6	0	2.38	2.83	CACNA2D3	calcium channel%2C voltage-dependent%2C alpha 2%2Fdelta subunit 3
XM_005681175.1	6	0	2.52	2.72	CBX7	chromobox homolog 7
XM_005690433.1	0	0	-1.87	-2.84	LRRN2	leucine rich repeat neuronal 2
XM_005683356.1	1	0	-1.06	-1.4	GALNT10	UDP-N-acetyl-alpha-D-galactosamine:polypeptide N-acetylgalactosaminyltransferase 10 %28GalNAc-T10%29
XM_005692073.1	0	0	-1.19	-1.88	ZNF423	zinc finger protein 423
XM_005682241.1	0	0	-1.14	-1.6	SYDE1	synapse defective 1%2C Rho GTPase%2C homolog 1 %28C. elegans%29
XM_005695183.1	0	0	-2.18	-3.24	ADAMTS7	ADAM metallopeptidase with thrombospondin type 1 motif%2C 7
XM_005686587.1	1	0	-1.65	-1.87	PKDCC	protein kinase domain containing%2C cytoplasmic
XM_005697369.1	6	0	1.84	2.17	FAM195A	family with sequence similarity 195%2C member A
XM_005678808.1	7	0	0.86	1.99	ZC3H12A	zinc finger CCCH-type containing 12A
XM_005698262.1	0	0	-0.59	-1.03	TCTN3	tectonic family member 3%2C transcript variant X1
XM_005686752.1	6	0	4.26	2.67	FOXI3	forkhead box I3
XM_005697622.1	0	0	-1.24	-2.15	ZKSCAN2	zinc finger with KRAB and SCAN domains 2
XM_005691187.1	0	0	-2.69	-5.35	LOC102169503	uncharacterized LOC102169503
XM_005684407.1	1	0	-2.23	-2.22	AKNA	AT-hook transcription factor
XM_005709509.1	0	0	-0.99	-1.51	PCDHGA9	protocadherin gamma subfamily A%2C 9
XM_005696489.1	0	0	-1.11	-1.77	MDFI	MyoD family inhibitor
XM_005687052.1	1	0	-1.08	-1	LOC102174485	uncharacterized LOC102174485
XM_005683864.1	1	0	-1.78	-1.88	GLIPR2	GLI pathogenesis-related 2
XR_309917.1	6	0	2.53	2.35	LOC102174620	uncharacterized LOC102174620
XM_005679757.1	1	0	-1.43	-1.53	E2F7	E2F transcription factor 7
XM_005697831.1	1	0	-1.2	-1.46	GAL3ST4	galactose-3-O-sulfotransferase 4
XM_005694161.1	1	0	-1.01	-1.2	GSG2	germ cell associated 2 %28haspin%29
XM_005683838.1	0	0	-0.81	-1.16	ARHGEF39	Rho guanine nucleotide exchange factor %28GEF%29 39
XM_005695630.1	1	0	-2.16	-2.57	CAMK1	calcium%2Fcalmodulin-dependent protein kinase I
XM_005695954.1	6	0	3.41	2.97	MST1	macrophage stimulating 1 %28hepatocyte growth factor-like%29
XM_005694407.1	0	0	-1.06	-1.61	CBX2	chromobox homolog 2
XM_005698682.1	1	0	-1.23	-1.06	WDR17	WD repeat domain 17
XM_005698748.1	0	0	-1.6	-2.87	TENM3	teneurin transmembrane protein 3
XM_005698890.1	1	0	-3.09	-3.24	PLAT	plasminogen activator%2C tissue
XM_005676945.1	0	0	-0.37	-1.07	CHPF	chondroitin polymerizing factor
XM_005686988.1	6	0	2.97	2.7	FAM49A	family with sequence similarity 49%2C member A%2C transcript variant X1
XM_005699519.1	1	0	-1.39	-1.39	E2F8	E2F transcription factor 8
XM_005698704.1	1	0	-1.2	-1.63	DCTD	dCMP deaminase
XM_005700087.1	6	0	1.51	1.17	SIRT3	sirtuin 3
XM_005695683.1	0	0	-0.49	-1.11	ULK4	unc-51 like kinase 4
XM_005690867.1	6	0	1.05	1.22	TNFRSF18	tumor necrosis factor receptor superfamily%2C member 18
XM_005691873.1	7	0	1.47	2.4	IL34	interleukin 34
XM_005679822.1	6	0	1.08	0.96	CRADD	CASP2 and RIPK1 domain containing adaptor with death domain
XM_005681030.1	1	0	-1.62	-2.06	TSPAN9	tetraspanin 9
XM_005696963.1	6	0	1.55	1.79	SERPINB8	serpin peptidase inhibitor%2C clade B %28ovalbumin%29%2C member 8%2C transcript variant X1
XM_005694580.1	0	0	-0.54	-1.38	NEURL1B	neuralized homolog 1B %28Drosophila%29
XM_005692837.1	0	0	-0.52	-1.03	TRPM4	transient receptor potential cation channel%2C subfamily M%2C member 4
XM_005709539.1	0	0	-0.99	-1.52	GPSM1	G-protein signaling modulator 1
XM_005675256.1	1	0	-2.07	-2.79	C1H3orf70	chromosome 1 open reading frame%2C human C3orf70
XM_005685602.1	1	0	-1.17	-1.27	GPR176	G protein-coupled receptor 176
XM_005687076.1	1	0	-1.8	-1.69	DNAJC27	DnaJ %28Hsp40%29 homolog%2C subfamily C%2C member 27
XM_005696239.1	6	0	1.33	1.28	HMGA1	high mobility group AT-hook 1%2C transcript variant X2
XM_005692948.1	0	0	-0.75	-2.23	LOC102179314	soluble scavenger receptor cysteine-rich domain-containing protein SSC5D-like
XM_005691748.1	0	0	-0.75	-1.26	ZNF70	zinc finger protein 70
XM_005692091.1	0	0	-0.57	-1.04	CCDC102A	coiled-coil domain containing 102A
XM_005692684.1	1	0	-2.81	-2.7	CA11	carbonic anhydrase XI
XM_005684943.1	6	0	3.5	3.79	SYTL3	synaptotagmin-like 3
XM_005693375.1	0	0	-0.96	-1.67	DOC2B	double C2-like domains%2C beta
XM_005692157.1	1	0	-1.43	-1.64	CENPT	centromere protein T
XM_005683775.1	1	0	-2.06	-2.36	APBA1	amyloid beta %28A4%29 precursor protein-binding%2C family A%2C member 1
XM_005694260.1	0	0	-2.66	-4.07	CACNA1G	calcium channel%2C voltage-dependent%2C T type%2C alpha 1G subunit
XM_005709699.1	0	0	-1.02	-1.7	SIPA1	signal-induced proliferation-associated 1
XM_005695498.1	0	0	-1.63	-2.31	VOPP1	vesicular%2C overexpressed in cancer%2C prosurvival protein 1
XM_005678014.1	0	0	-1.15	-2.39	NTNG1	netrin G1
XM_005694520.1	6	0	2.82	3.38	KCNMB1	potassium large conductance calcium-activated channel%2C subfamily M%2C beta member 1%2C transcript variant X1
XM_005693825.1	6	0	2.42	2.62	JUP	junction plakoglobin%2C transcript variant X1
XM_005684480.1	1	0	-1.9	-1.56	CENPW	centromere protein W
XM_005697752.1	7	0	1.57	2.22	PSPH	phosphoserine phosphatase%2C transcript variant X1
XM_005685201.1	1	0	-1.49	-1.68	NFATC4	nuclear factor of activated T-cells%2C cytoplasmic%2C calcineurin-dependent 4%2C transcript variant X1
XM_005690421.1	6	0	2.25	2.83	YOD1	YOD1 deubiquitinase%2C transcript variant X1
XM_005676601.1	1	0	-1.33	-1.55	SLC4A3	solute carrier family 4 %28anion exchanger%29%2C member 3
XM_005699347.1	1	0	-1.48	-1.27	WDFY4	WDFY family member 4
XM_005687536.1	2	0	-1.56	-0.4	ALOX5AP	arachidonate 5-lipoxygenase-activating protein
XM_005680388.1	1	0	-2.5	-2.12	MMP19	matrix metallopeptidase 19
XM_005692732.1	1	0	-1.82	-2.15	CPT1C	carnitine palmitoyltransferase 1C
XM_005675001.1	1	0	-1.35	-0.68	HCLS1	hematopoietic cell-specific Lyn substrate 1
XM_005700371.1	1	0	-1.45	-0.74	SASH3	SAM and SH3 domain containing 3
XM_005674744.1	6	0	1.36	1.72	LOC102168484	protein eva-1 homolog C-like
XM_005689749.1	0	0	-0.47	-1.06	SYT9	synaptotagmin IX
XM_005684448.1	1	0	-1.45	-1.83	HMGN3	high mobility group nucleosomal binding domain 3%2C transcript variant X3
XM_005689472.1	6	0	1.35	1.44	C15H11orf71	chromosome 15 open reading frame%2C human C11orf71
XM_005683266.1	1	0	-1.37	-1.57	PCDHGB6	protocadherin gamma subfamily B%2C 6
XM_005697706.1	6	0	0.93	1.17	ITGAL	integrin%2C alpha L %28antigen CD11A %28p180%29%2C lymphocyte function-associated antigen 1%3B alpha polypeptide%29
XM_005677234.1	6	0	2.53	3.01	KCNJ10	potassium inwardly-rectifying channel%2C subfamily J%2C member 10
XM_005682536.1	6	0	3.84	4.08	CRB3	crumbs homolog 3 %28Drosophila%29
XM_005688132.1	6	0	3.32	2.78	ASB13	ankyrin repeat and SOCS box containing 13
XM_005680784.1	1	0	-0.99	-1.08	KCNJ8	potassium inwardly-rectifying channel%2C subfamily J%2C member 8
XM_005680732.1	6	0	1.24	1	TM7SF3	transmembrane 7 superfamily member 3%2C transcript variant X1
XM_005698713.1	1	0	-1.26	-1.15	CCDC111	coiled-coil domain containing 111
XM_005687941.1	1	0	-2.24	-2.84	PRTFDC1	phosphoribosyl transferase domain containing 1
XM_005690848.1	6	0	2.29	2.82	LOC102185293	1-phosphatidylinositol 4%2C5-bisphosphate phosphodiesterase eta-2-like
XM_005699300.1	1	0	-2.03	-2.07	PLAC9	placenta-specific 9
XM_005683638.1	0	0	-2.19	-3.55	ADAMTSL1	ADAMTS-like 1
XM_005690603.1	0	0	-1.22	-1.91	KIF26B	kinesin family member 26B
XM_005677994.1	1	0	-1.08	-0.97	WNT2B	wingless-type MMTV integration site family%2C member 2B
XM_005692081.1	1	0	-2.94	-2.2	IRX3	iroquois homeobox 3
XM_005682726.1	0	0	-3.35	-4.88	FBN2	fibrillin 2
XM_005683288.1	0	0	-0.95	-1.55	LOC102172994	lipid phosphate phosphatase-related protein type 3-like
XM_005686743.1	6	0	2.68	2.02	C11H2orf40	chromosome 11 open reading frame%2C human C2orf40
XM_005696240.1	7	0	0.96	1.38	LOC102172109	uncharacterized LOC102172109
XM_005683447.1	6	0	2.4	2.93	ELL2	elongation factor%2C RNA polymerase II%2C 2%2C transcript variant X1
XM_005681166.1	0	0	-0.53	-1.14	PLA2G6	phospholipase A2%2C group VI %28cytosolic%2C calcium-independent%29
XM_005682223.1	6	0	2.66	2.49	PGLYRP2	peptidoglycan recognition protein 2
XM_005691246.1	1	0	-2.21	-2.7	PCDH18	protocadherin 18%2C transcript variant X2
XM_005700449.1	0	0	-1.93	-2.97	SLITRK2	SLIT and NTRK-like family%2C member 2
XM_005688826.1	0	0	-2.43	-4.27	WISP1	WNT1 inducible signaling pathway protein 1
XM_005691466.1	6	0	2.45	2.34	NOS1	nitric oxide synthase 1 %28neuronal%29
XM_005693220.1	0	0	-1.31	-2.12	TMEM98	transmembrane protein 98
XM_005677998.1	1	0	-2.58	-1.4	KCNA3	potassium voltage-gated channel%2C shaker-related subfamily%2C member 3
XM_005698125.1	0	0	-1.25	-1.97	TTYH3	tweety family member 3
XM_005677711.1	7	0	0.83	2.42	LOC102173987	high affinity immunoglobulin gamma Fc receptor I-like
XM_005693579.1	0	0	-0.89	-1.46	ADPRM	ADP-ribose%2FCDP-alcohol diphosphatase%2C manganese-dependent
XM_005709409.1	7	0	0.59	1.14	DPP7	dipeptidyl-peptidase 7
XM_005701046.1	1	0	-1.28	-1.44	CDKL5	cyclin-dependent kinase-like 5
XM_005691511.1	0	0	-3.05	-4.23	TMEM132C	transmembrane protein 132C
XM_005687746.1	6	0	2.72	3.53	RAB20	RAB20%2C member RAS oncogene family
XM_005690143.1	0	0	-2.18	-3.32	PRDM11	PR domain containing 11
XM_005700148.1	1	0	-1.7	-2.08	DRP2	dystrophin related protein 2
XM_005682489.1	0	0	-0.41	-1.11	ADAMTS10	ADAM metallopeptidase with thrombospondin type 1 motif%2C 10
XM_005682152.1	6	0	5.02	4.32	LOC102181858	leukotriene-B%284%29 omega-hydroxylase 1-like
XM_005694906.1	0	0	-1.38	-1.93	LPCAT1	lysophosphatidylcholine acyltransferase 1
XM_005699773.1	1	0	-1.16	-1.11	ASRGL1	asparaginase like 1
XM_005685860.1	0	0	-1.25	-1.9	GNB5	guanine nucleotide binding protein %28G protein%29%2C beta 5
XM_005679358.1	1	0	-1.6	-2.06	TRIL	TLR4 interactor with leucine-rich repeats
XM_005696138.1	7	0	3.01	4.77	ATP2B2	ATPase%2C Ca%2B%2B transporting%2C plasma membrane 2
XM_005689171.1	0	0	-1.05	-1.88	ZFPM2	zinc finger protein%2C FOG family member 2
XM_005694362.1	6	0	3.83	4.31	LOC102171650	cytochrome b561-like
XM_005683516.1	6	0	3.3	2.4	MFAP3L	microfibrillar-associated protein 3-like
XM_005683015.1	1	0	-0.99	-1.08	SPATA24	spermatogenesis associated 24
XM_005676425.1	7	0	1.86	2.86	CPO	carboxypeptidase O
XM_005688680.1	0	0	-1.45	-2.35	SOGA1	suppressor of glucose%2C autophagy associated 1
XM_005696522.1	6	0	1.55	1.92	C23H6orf141	chromosome 23 open reading frame%2C human C6orf141
XM_005680768.1	1	0	-1.35	-1.63	LOC102180290	putative ubiquitin carboxyl-terminal hydrolase 41-like
XM_005694385.1	6	0	2.37	1.21	NOTUM	notum pectinacetylesterase homolog %28Drosophila%29
XM_005709425.1	0	0	-2.6	-3.65	TTYH2	tweety family member 2
XM_005694998.1	0	0	-1.64	-2.52	ZSCAN2	zinc finger and SCAN domain containing 2
XM_005675785.1	6	0	1.46	1.32	RUNX1	runt-related transcription factor 1
XM_005694783.1	1	0	-1.06	-1.08	NUP155	nucleoporin 155kDa%2C transcript variant X1
XM_005688242.1	1	0	-1.65	-2.09	EBF4	early B-cell factor 4
XM_005697108.1	1	0	-2.59	-3.06	CDH2	cadherin 2%2C type 1%2C N-cadherin %28neuronal%29
XM_005697939.1	6	0	3.27	2.88	SEC14L5	SEC14-like 5 %28S. cerevisiae%29
XM_005688735.1	1	0	-2.2	-2.53	FAM65C	family with sequence similarity 65%2C member C
XM_005687626.1	6	0	1.61	1.85	RASL11A	RAS-like%2C family 11%2C member A
XM_005689578.1	3	0	-0.16	-1.06	ABCC8	ATP-binding cassette%2C sub-family C %28CFTR%2FMRP%29%2C member 8
XM_005682176.1	1	0	-2.45	-3.04	TMEM59L	transmembrane protein 59-like
XM_005700178.1	1	0	-1.84	-2.29	SLC25A53	solute carrier family 25%2C member 53
XM_005699232.1	0	0	-0.98	-1.67	KAT6B	K%28lysine%29 acetyltransferase 6B%2C transcript variant X1
XM_005675855.1	6	0	1.95	2.06	LOC102179605	cytochrome P450 27C1-like
XR_310366.1	1	0	-1.12	-1.14	LOC102191340	uncharacterized LOC102191340
XM_005689527.1	1	0	-0.86	-1.15	LOC102172082	40S ribosomal protein S25-like%2C transcript variant X1
XM_005691684.1	6	0	2.76	2.2	LOC102181416	uncharacterized LOC102181416
XM_005698926.1	0	0	-1.72	-2.59	RARB	retinoic acid receptor%2C beta
XM_005709515.1	0	0	-0.86	-1.68	PCDHGA7	protocadherin gamma subfamily A%2C 7
XM_005698886.1	1	0	-1.01	-1.09	GINS4	GINS complex subunit 4 %28Sld5 homolog%29
XM_005679617.1	6	0	1.54	1.77	LOC102182098	ephrin type-B receptor 6-like
XR_311091.1	6	0	1.07	1.19	LOC102176489	uncharacterized LOC102176489
XM_005689214.1	1	0	-2.24	-2.15	MATN2	matrilin 2%2C transcript variant X1
XM_005693899.1	6	0	1.74	1.99	ETV4	ets variant 4%2C transcript variant X1
XM_005688799.1	0	0	-0.87	-1.34	ZNF696	zinc finger protein 696
XM_005683265.1	1	0	-1.2	-1.57	PCDHGA8	protocadherin gamma subfamily A%2C 8
XM_005681996.1	1	0	-1.38	-1.67	GRK4	G protein-coupled receptor kinase 4
XM_005699118.1	2	0	-1.6	-0.56	DNA2	DNA replication helicase%2Fnuclease 2
XM_005691874.1	3	0	-0.24	-1.18	FUK	fucokinase
XM_005696455.1	0	0	-1.93	-2.84	LOC102184208	ras%2FRap GTPase-activating protein SynGAP-like
XM_005688525.1	1	0	-1.2	-1.09	DSN1	DSN1%2C MIS12 kinetochore complex component%2C transcript variant X1
XM_005697689.1	0	0	-1.51	-2.27	PRRT2	proline-rich transmembrane protein 2
XM_005683282.1	7	0	1.79	2.62	HCN2	hyperpolarization activated cyclic nucleotide-gated potassium channel 2
XR_309998.1	1	0	-1.43	-1.88	LOC102190935	natural resistance-associated macrophage protein 2-like
XM_005694064.1	0	0	-1.09	-1.73	ARL16	ADP-ribosylation factor-like 16
XM_005696750.1	6	0	1.62	1.52	LOC102184572	histone H2B type 1-M-like%2C transcript variant X1
XM_005690396.1	1	0	-1.14	-0.73	TMEM81	transmembrane protein 81
XM_005685097.1	6	0	2.98	2.91	PTGER2	prostaglandin E receptor 2 %28subtype EP2%29%2C 53kDa
XM_005698079.1	1	0	-1.1	-1.14	NYAP1	neuronal tyrosine-phosphorylated phosphoinositide-3-kinase adaptor 1
XM_005689671.1	7	0	1.91	2.63	MICAL2	microtubule associated monooxygenase%2C calponin and LIM domain containing 2%2C transcript variant X1
XM_005694741.1	6	0	4.01	3.56	LOC102177002	serine%2Fthreonine-protein kinase NIM1-like
XM_005677116.1	0	0	-2.17	-3.12	RGS4	regulator of G-protein signaling 4%2C transcript variant X1
XM_005685357.1	0	0	-1.58	-2.63	SALL2	sal-like 2 %28Drosophila%29
XM_005683399.1	7	0	2.5	3.6	HAPLN1	hyaluronan and proteoglycan link protein 1
XM_005682192.1	1	0	-1.33	-1.69	MAP1S	microtubule-associated protein 1S
XM_005695666.1	6	0	4.22	4.44	DCLK3	doublecortin-like kinase 3
XM_005682172.1	0	0	-0.51	-1.68	CERS1	ceramide synthase 1
XM_005683481.1	1	0	-3.54	-3.04	GPR98	G protein-coupled receptor 98
XM_005698608.1	1	0	-1.15	-0.72	ADRA2A	adrenoceptor alpha 2A
XM_005700469.1	0	0	-0.88	-1.54	AFF2	AF4%2FFMR2 family%2C member 2%2C transcript variant X2
XM_005692174.1	1	0	-1.9	-2.21	PLA2G15	phospholipase A2%2C group XV
XM_005697456.1	7	0	1.38	1.96	TNFRSF12A	tumor necrosis factor receptor superfamily%2C member 12A
XM_005678492.1	6	0	1.01	0.97	LOC102191200	metalloprotease TIKI2-like
XM_005709543.1	6	0	1.14	1.34	P2RY2	purinergic receptor P2Y%2C G-protein coupled%2C 2
XM_005681953.1	6	0	2.56	1.94	BMP3	bone morphogenetic protein 3
XM_005684466.1	1	0	-1.53	-1.58	RWDD2A	RWD domain containing 2A
XM_005688973.1	7	0	0.68	1.1	ATP6V1H	ATPase%2C H%2B transporting%2C lysosomal 50%2F57kDa%2C V1 subunit H%2C transcript variant X1
XM_005696580.1	6	0	3.17	3.37	LOC102180547	sperm acrosome membrane-associated protein 4-like%2C transcript variant X4
XM_005691100.1	6	0	2.37	2.8	LOC102190627	zinc transporter 1-like
XR_311215.1	7	0	3.01	4.59	LOC102168611	uncharacterized LOC102168611%2C transcript variant X1
XM_005675234.1	0	0	-2.17	-3.27	SEMA5B	sema domain%2C seven thrombospondin repeats %28type 1 and type 1-like%29%2C transmembrane domain %28TM%29 and short cytoplasmic domain%2C %28semaphorin%29 5B
XM_005688881.1	6	0	1.56	1.65	C14H8orf82	chromosome 14 open reading frame%2C human C8orf82
XM_005695941.1	0	0	-0.85	-1.17	TRAIP	TRAF interacting protein
XM_005687693.1	0	0	-1.4	-2.07	KCTD12	potassium channel tetramerization domain containing 12
XM_005687411.1	0	0	-1.45	-2.15	KBTBD7	kelch repeat and BTB %28POZ%29 domain containing 7
XM_005694101.1	1	0	-1.4	-1.17	SEC14L1	SEC14-like 1 %28S. cerevisiae%29%2C transcript variant X2
XM_005697230.1	0	0	-2.51	-3.99	PIEZO2	piezo-type mechanosensitive ion channel component 2
XM_005700010.1	7	0	0.66	1.11	PELI3	pellino E3 ubiquitin protein ligase family member 3
XM_005688737.1	0	0	-1.18	-1.8	BCAS4	breast carcinoma amplified sequence 4
XM_005693692.1	6	0	1.22	1.54	ABI3	ABI family%2C member 3
XM_005699961.1	0	0	-1.05	-1.55	C29H11orf95	chromosome 29 open reading frame%2C human C11orf95
XM_005698703.1	1	0	-1.42	-1.54	NEIL3	nei endonuclease VIII-like 3 %28E. coli%29
XM_005709706.1	1	0	-2.78	-3.34	SORCS2	sortilin-related VPS10 domain containing receptor 2
XM_005688730.1	1	0	-1.09	-1.41	B4GALT5	UDP-Gal:betaGlcNAc beta 1%2C4- galactosyltransferase%2C polypeptide 5
XM_005695446.1	6	0	2.37	1.95	CCDC85C	coiled-coil domain containing 85C
XM_005688703.1	6	0	4.23	2.85	MATN4	matrilin 4
XM_005691213.1	7	0	0.76	1.54	HHIP	hedgehog interacting protein
XM_005693385.1	7	0	0.66	2.36	RTN4RL1	reticulon 4 receptor-like 1
XM_005685308.1	0	0	-2.29	-4	IGDCC4	immunoglobulin superfamily%2C DCC subclass%2C member 4
XM_005680677.1	2	0	-1.87	-0.91	CYTH4	cytohesin 4
XM_005699296.1	1	0	-2.17	-2.92	KCNMA1	potassium large conductance calcium-activated channel%2C subfamily M%2C alpha member 1
XM_005685149.1	1	0	-1.55	-1.45	CALML4	calmodulin-like 4%2C transcript variant X1
XM_005692024.1	6	0	2.33	1.71	DOK4	docking protein 4%2C transcript variant X1
XM_005700400.1	0	0	-1.8	-4.2	APLN	apelin
XM_005675100.1	6	0	9.13	8.94	LRRC15	leucine rich repeat containing 15%2C transcript variant X1
XM_005678461.1	1	0	-2.92	-3.62	BEND5	BEN domain containing 5
XM_005682516.1	7	0	0.76	1.19	C7H19orf70	chromosome 7 open reading frame%2C human C19orf70%2C transcript variant X2
XM_005692080.1	1	0	-4.53	-4.26	TOX3	TOX high mobility group box family member 3
XM_005688934.1	1	0	-2.34	-1.69	KHDRBS3	KH domain containing%2C RNA binding%2C signal transduction associated 3
XM_005692587.1	1	0	-1.98	-2.7	GRIK5	glutamate receptor%2C ionotropic%2C kainate 5
XM_005676843.1	6	0	1.87	1.68	NIPAL3	NIPA-like domain containing 3%2C transcript variant X1
XM_005686438.1	6	0	1.04	1.15	CREG2	cellular repressor of E1A-stimulated genes 2
XM_005689422.1	1	0	-1.86	-0.97	C15H11orf65	chromosome 15 open reading frame%2C human C11orf65
XM_005694209.1	0	0	-0.5	-1.38	TMEM88	transmembrane protein 88
XM_005693354.1	1	0	-1.08	-1.28	SARM1	sterile alpha and TIR motif containing 1
XM_005689044.1	1	0	-3.82	-4.19	SULF1	sulfatase 1
XM_005676926.1	0	0	-1.82	-3.03	IGFBP2	insulin-like growth factor binding protein 2%2C 36kDa
XM_005691745.1	1	0	-1.14	-1.55	YPEL1	yippee-like 1 %28Drosophila%29
XM_005686419.1	2	0	-1.29	-0.35	ARID5A	AT rich interactive domain 5A %28MRF1-like%29
XM_005679506.1	6	0	3.75	4.08	FAM180A	family with sequence similarity 180%2C member A
XM_005684288.1	1	0	-1.86	-2.44	AKAP2	A kinase %28PRKA%29 anchor protein 2%2C transcript variant X1
XM_005682556.1	0	0	-0.55	-1.03	SEMA6B	sema domain%2C transmembrane domain %28TM%29%2C and cytoplasmic domain%2C %28semaphorin%29 6B
XM_005687304.1	6	0	3.83	2.93	HMCN2	hemicentin 2
XM_005686121.1	6	0	2.82	2.6	LOC102182233	acyl-coenzyme A thioesterase 4-like
XM_005682937.1	6	0	1.46	0.95	TCF7	transcription factor 7 %28T-cell specific%2C HMG-box%29%2C transcript variant X4
XM_005686261.1	7	0	2.28	3.41	LOC102179012	protein FAM178B-like
XM_005693276.1	6	0	2.06	1.74	PIPOX	pipecolic acid oxidase
XM_005679576.1	6	0	1.69	1.12	LOC102190100	retinoic acid receptor responder protein 2-like%2C transcript variant X1
XM_005698866.1	0	0	-1	-2.09	RNF122	ring finger protein 122
XM_005683336.1	0	0	-1.21	-1.73	PCDHGA2	protocadherin gamma subfamily A%2C 2
XM_005679635.1	0	0	-1.59	-2.25	CNTNAP2	contactin associated protein-like 2
XM_005690533.1	1	0	-1.25	-1.21	PARP1	poly %28ADP-ribose%29 polymerase 1%2C transcript variant X1
XM_005689101.1	6	0	1.91	1.41	SBSPON	somatomedin B and thrombospondin%2C type 1 domain containing
XM_005685898.1	1	0	-1.19	-0.93	PELI2	pellino E3 ubiquitin protein ligase family member 2
XM_005696883.1	6	0	1.6	1.33	GFOD1	glucose-fructose oxidoreductase domain containing 1
XM_005676222.1	1	0	-2.18	-1.91	HOXD8	homeobox D8
XM_005695606.1	1	0	-1.35	-1.84	ZNF502	zinc finger protein 502%2C transcript variant X2
XM_005692868.1	6	0	2.17	1.43	CLEC11A	C-type lectin domain family 11%2C member A
XM_005684200.1	0	0	-1.47	-2.63	LGI3	leucine-rich repeat LGI family%2C member 3
XM_005695399.1	1	0	-2.5	-3.04	CLMN	calmin %28calponin-like%2C transmembrane%29
XM_005675663.1	0	0	-1.35	-2.24	LRRC3	leucine rich repeat containing 3
XM_005691940.1	6	0	2.07	2.13	LOC102171182	tigger transposable element-derived protein 1-like
XR_310487.1	0	0	-0.58	-1.31	LOC102191349	uncharacterized LOC102191349
XM_005681120.1	1	0	-4.82	-5.35	MEI1	meiosis inhibitor 1
XM_005682411.1	7	0	1.69	5.28	LOC102172254	CD209 antigen-like protein 2-like
XM_005694966.1	6	0	2.56	2.31	ACAN	aggrecan
XM_005692508.1	0	0	-1.19	-1.96	ARHGAP33	Rho GTPase activating protein 33
XM_005682483.1	0	0	-2.75	-5.11	FBN3	fibrillin 3
XM_005683763.1	0	0	-1.17	-2.05	GLIS3	GLIS family zinc finger 3
XM_005687543.1	7	0	1.65	2.34	SLC46A3	solute carrier family 46%2C member 3%2C transcript variant X1
XM_005676991.1	6	0	2	2.18	CD164L2	CD164 sialomucin-like 2
XM_005699415.1	1	0	-2.61	-3.13	NAALAD2	N-acetylated alpha-linked acidic dipeptidase 2
XR_310393.1	7	0	1.25	2.03	LOC102185662	uncharacterized LOC102185662%2C transcript variant X1
XM_005690281.1	6	0	1.25	1.13	SLC43A3	solute carrier family 43%2C member 3%2C transcript variant X2
XM_005683455.1	1	0	-4.01	-5.2	LIX1	Lix1 homolog %28chicken%29
XM_005688110.1	7	0	0.76	1.34	OVOL2	ovo-like 2 %28Drosophila%29
XM_005709679.1	4	0	0.38	1.46	UCP2	uncoupling protein 2 %28mitochondrial%2C proton carrier%29
XM_005688549.1	6	0	3.05	3.24	BPI	bactericidal%2Fpermeability-increasing protein
XM_005686241.1	0	0	-1.22	-2.34	ZNF514	zinc finger protein 514
XM_005700763.1	0	0	-1.29	-2.48	KCND1	potassium voltage-gated channel%2C Shal-related subfamily%2C member 1
XM_005694282.1	0	0	-1.06	-1.62	HOXB2	homeobox B2
XM_005689890.1	2	0	-1.66	-0.46	FOLR2	folate receptor 2 %28fetal%29
XM_005677951.1	3	0	-0.12	-1.23	AMIGO1	adhesion molecule with Ig-like domain 1%2C transcript variant X1
XM_005693642.1	6	0	1.19	1.18	LOC102176263	nucleoside diphosphate kinase A 1-like%2C transcript variant X2
XM_005679514.1	1	0	-1.65	-1.56	TRIM24	tripartite motif containing 24%2C transcript variant X1
XM_005679673.1	1	0	-1.68	-1.93	DPP6	dipeptidyl-peptidase 6
XM_005689093.1	1	0	-2.54	-2.28	LOC102191152	25-hydroxycholesterol 7-alpha-hydroxylase-like
XM_005687922.1	1	0	-1.94	-1.8	SKIDA1	SKI%2FDACH domain containing 1
XM_005685287.1	1	0	-2.57	-3.08	LOC102185571	aminopeptidase Q-like
XM_005684993.1	0	0	-0.68	-1.47	RPS6KA2	ribosomal protein S6 kinase%2C 90kDa%2C polypeptide 2
XM_005693188.1	0	0	-0.75	-1.73	TEX14	testis expressed 14
XM_005685395.1	1	0	-1.87	-1	RNASE6	ribonuclease%2C RNase A family%2C k6
XM_005687333.1	6	0	0.92	1.13	SURF1	surfeit 1%2C transcript variant X2
XM_005682363.1	0	0	-0.92	-1.44	CDKN2D	cyclin-dependent kinase inhibitor 2D %28p19%2C inhibits CDK4%29
XM_005694254.1	1	0	-1.14	-1.12	NT5M	5%27%2C3%27-nucleotidase%2C mitochondrial
XM_005682754.1	0	0	-1.4	-2.02	MXD3	MAX dimerization protein 3
XM_005681167.1	6	0	1.29	1.69	MAFF	v-maf avian musculoaponeurotic fibrosarcoma oncogene homolog F
XM_005697222.1	0	0	-1.56	-3.4	LAMA1	laminin%2C alpha 1
XM_005684720.1	6	0	3.01	2.1	MRAP2	melanocortin 2 receptor accessory protein 2
XM_005692381.1	7	0	1.69	2.45	RINL	Ras and Rab interactor-like
XM_005692236.1	1	0	-2.13	-1.67	CCNE1	cyclin E1
XM_005688913.1	0	0	-0.97	-2	LOC102183805	zinc finger protein 679-like
XM_005685714.1	6	0	2.36	2.53	LIPC	lipase%2C hepatic
XM_005694243.1	6	0	2	2.12	LOC102180255	RING finger protein 112-like
XM_005695677.1	0	0	-2.32	-3.37	SCN5A	sodium channel%2C voltage-gated%2C type V%2C alpha subunit
XM_005675197.1	6	0	2.25	2.19	AP2M1	adaptor-related protein complex 2%2C mu 1 subunit%2C transcript variant X2
XM_005694370.1	1	0	-1.38	-1.76	B3GNTL1	UDP-GlcNAc:betaGal beta-1%2C3-N-acetylglucosaminyltransferase-like 1
XM_005685328.1	6	0	2.24	2.21	LTB4R	leukotriene B4 receptor
XM_005687443.1	1	0	-1.81	-1.45	HTR2A	5-hydroxytryptamine %28serotonin%29 receptor 2A%2C G protein-coupled
XR_310307.1	6	0	3.31	3.15	LOC102186399	uncharacterized LOC102186399
XM_005693174.1	2	0	-1.04	-0.52	PCTP	phosphatidylcholine transfer protein
XM_005691917.1	0	0	-0.42	-1.13	ZFPM1	zinc finger protein%2C FOG family member 1
XM_005691165.1	1	0	-1.44	-1.37	MND1	meiotic nuclear divisions 1 homolog %28S. cerevisiae%29
XM_005678464.1	6	0	2.19	1.86	PTGER3	prostaglandin E receptor 3 %28subtype EP3%29
XM_005681049.1	6	0	1.9	1.78	ATP6V1E1	ATPase%2C H%2B transporting%2C lysosomal 31kDa%2C V1 subunit E1%2C transcript variant X4
XM_005686926.1	7	0	0.85	1.52	MAPRE3	microtubule-associated protein%2C RP%2FEB family%2C member 3%2C transcript variant X2
XM_005678799.1	6	0	5.16	4.98	LOC102187369	bone morphogenetic protein 8A-like
XM_005700610.1	2	0	-2.07	-1	LOC102188123	melanoma-associated antigen E2-like
XM_005679232.1	0	0	-1.25	-1.9	PDE1C	phosphodiesterase 1C%2C calmodulin-dependent 70kDa
XM_005688318.1	5	0	2.1	0.62	GCNT7	glucosaminyl %28N-acetyl%29 transferase family member 7
XM_005675136.1	6	0	1.64	2.1	BCL6	B-cell CLL%2Flymphoma 6%2C transcript variant X1
XM_005694574.1	1	0	-1.67	-0.94	DOCK2	dedicator of cytokinesis 2
XM_005694931.1	6	0	2.07	1.87	MCTP2	multiple C2 domains%2C transmembrane 2%2C transcript variant X1
XM_005692509.1	1	0	-1.53	-1.7	NPHS1	nephrosis 1%2C congenital%2C Finnish type %28nephrin%29
XM_005696555.1	0	0	-1.08	-1.72	EGFL8	EGF-like-domain%2C multiple 8
XM_005692826.1	0	0	-1.22	-1.78	MAMSTR	MEF2 activating motif and SAP domain containing transcriptional regulator
XM_005688303.1	0	0	-1.09	-1.52	LOC102189140	guanine nucleotide-binding protein G%28s%29 subunit alpha isoforms short-like%2C transcript variant X3
XM_005680564.1	6	0	0.83	1	TXNRD1	thioredoxin reductase 1%2C transcript variant X8
XM_005699068.1	0	0	-1.21	-1.65	ARID5B	AT rich interactive domain 5B %28MRF1-like%29%2C transcript variant X1
XM_005692797.1	1	0	-0.91	-1.14	FKRP	fukutin related protein
XM_005687146.1	0	0	-0.69	-1.85	MVB12B	multivesicular body subunit 12B
XM_005690968.1	1	0	-1.63	-1.96	COLGALT2	collagen beta%281-O%29galactosyltransferase 2
XM_005699152.1	0	0	-2.19	-3.7	ADAMTS14	ADAM metallopeptidase with thrombospondin type 1 motif%2C 14
XM_005686586.1	1	0	-2.29	-2.99	NRXN1	neurexin 1
XM_005679864.1	0	0	-1.22	-2.15	HOXC5	homeobox C5
XM_005677728.1	6	0	2.39	1.97	LOC102180554	histone H3-like
XM_005685871.1	6	0	2.32	1.84	BMP4	bone morphogenetic protein 4%2C transcript variant X1
XR_309933.1	6	0	1.7	1.9	LOC102180720	uncharacterized LOC102180720
XM_005692846.1	6	0	2.55	2.73	TSKS	testis-specific serine kinase substrate
XM_005709518.1	0	0	-1.02	-1.56	PCDHGB4	protocadherin gamma subfamily B%2C 4
XM_005680901.1	4	0	0.7	3.17	CLEC4A	C-type lectin domain family 4%2C member A
XM_005709559.1	1	0	-2.78	-3.41	VCAM1	vascular cell adhesion molecule 1
XM_005684858.1	1	0	-1.47	-1.82	HIVEP2	human immunodeficiency virus type I enhancer binding protein 2%2C transcript variant X1
XM_005676860.1	6	0	1.35	1.5	GALE	UDP-galactose-4-epimerase%2C transcript variant X1
XM_005697915.1	0	0	-0.46	-1.09	ZNF213	zinc finger protein 213
XM_005693203.1	1	0	-1.47	-1.58	RASL10B	RAS-like%2C family 10%2C member B
XM_005693770.1	0	0	-0.89	-1.57	MSL1	male-specific lethal 1 homolog %28Drosophila%29%2C transcript variant X1
XM_005678678.1	0	0	-1.26	-1.93	MANEAL	mannosidase%2C endo-alpha-like
XM_005698119.1	1	0	-2.51	-3.17	CARD11	caspase recruitment domain family%2C member 11
XM_005681024.1	0	0	-1.84	-2.93	KCNA6	potassium voltage-gated channel%2C shaker-related subfamily%2C member 6
XM_005700833.1	0	0	-0.45	-1.26	USP11	ubiquitin specific peptidase 11%2C transcript variant X4
XM_005675612.1	1	0	-2.23	-2.93	CPNE4	copine IV
XM_005694271.1	0	0	-1.92	-2.99	NGFR	nerve growth factor receptor
XM_005678156.1	0	0	-3.22	-4.48	DDAH1	dimethylarginine dimethylaminohydrolase 1
XM_005696884.1	1	0	-2	-1.77	PHACTR1	phosphatase and actin regulator 1
XM_005692794.1	1	0	-3.16	-3.89	HIF3A	hypoxia inducible factor 3%2C alpha subunit
XM_005688370.1	6	0	1.37	1.83	HCK	hemopoietic cell kinase
XM_005699818.1	1	0	-2.06	-2.58	LOC102171133	fatty acid desaturase 2-like
XM_005684576.1	1	0	-1.26	-1.69	WASF1	WAS protein family%2C member 1
XM_005690195.1	6	0	2.39	2.41	C15H11orf96	chromosome 15 open reading frame%2C human C11orf96
XM_005699085.1	6	0	1.11	1.08	NRBF2	nuclear receptor binding factor 2%2C transcript variant X1
XM_005683511.1	0	0	-1.42	-2.31	LOC102191795	uncharacterized LOC102191795
XM_005680394.1	0	0	-1.22	-1.76	GDF11	growth differentiation factor 11
XM_005680597.1	6	0	2.97	3.96	TOM1	target of myb1 %28chicken%29%2C transcript variant X1
XM_005695166.1	1	0	-2.03	-2.13	STXBP6	syntaxin binding protein 6 %28amisyn%29
XM_005680937.1	6	0	1.03	1.4	SPSB2	splA%2Fryanodine receptor domain and SOCS box containing 2%2C transcript variant X4
XM_005682755.1	6	0	1.03	1.29	RGS14	regulator of G-protein signaling 14
XM_005698401.1	1	0	-1.75	-2.2	KAZALD1	Kazal-type serine peptidase inhibitor domain 1
XM_005676206.1	1	0	-1.16	-1.44	GPR39	G protein-coupled receptor 39
XM_005681001.1	4	0	0.53	2.11	NINJ2	ninjurin 2
XM_005678079.1	6	0	1.54	1.55	ABCA4	ATP-binding cassette%2C sub-family A %28ABC1%29%2C member 4
XM_005693054.1	0	0	-2.38	-3.54	LOC102189790	paternally-expressed gene 3 protein-like
XM_005694228.1	6	0	3.13	4.03	SHISA6	shisa family member 6
XM_005685116.1	0	0	-1.26	-1.73	VWA9	von Willebrand factor A domain containing 9%2C transcript variant X5
XM_005699816.1	0	0	-1.52	-2.14	DAGLA	diacylglycerol lipase%2C alpha
XM_005688749.1	6	0	2.73	1.62	LOC102179785	uncharacterized LOC102179785
XM_005679747.1	0	0	-1.19	-2.3	SYT1	synaptotagmin I
XM_005674986.1	1	0	-1.5	-1.92	FSTL1	follistatin-like 1%2C transcript variant X2
XM_005677420.1	0	0	-0.66	-1.45	SHC1	SHC %28Src homology 2 domain containing%29 transforming protein 1%2C transcript variant X2
XM_005698657.1	6	0	2.06	2.14	LOC102181360	uncharacterized LOC102181360
XM_005698365.1	0	0	-1.2	-2.01	PSD	pleckstrin and Sec7 domain containing
XM_005700290.1	1	0	-2.15	-2.29	2015-09-06	septin 6%2C transcript variant X4
XM_005684982.1	6	0	0.93	1.25	TAGAP	T-cell activation RhoGTPase activating protein
XM_005697671.1	7	0	1.49	2.2	ALDOA	aldolase A%2C fructose-bisphosphate%2C transcript variant X1
XM_005700119.1	1	0	-2.81	-3.57	SRPX2	sushi-repeat containing protein%2C X-linked 2
XM_005697591.1	6	0	2.84	1.42	CRYM	crystallin%2C mu%2C transcript variant X1
XM_005696042.1	2	0	-1.83	-0.11	CCR1	chemokine %28C-C motif%29 receptor 1
XM_005694207.1	0	0	-0.61	-1.86	EFNB3	ephrin-B3
XM_005681191.1	0	0	-2.85	-5.46	TNFRSF13C	tumor necrosis factor receptor superfamily%2C member 13C
XM_005689378.1	1	0	-1.46	-1.97	KIAA1377	KIAA1377 ortholog
XM_005694128.1	6	0	2.99	3.62	ITGB4	integrin%2C beta 4%2C transcript variant X1
XM_005675037.1	1	0	-1.27	-1.59	ADCY5	adenylate cyclase 5
XM_005697436.1	0	0	-1.22	-2.04	RAB26	RAB26%2C member RAS oncogene family
XM_005677201.1	0	0	-1.97	-3.45	ADAMTS4	ADAM metallopeptidase with thrombospondin type 1 motif%2C 4
XM_005699335.1	1	0	-3.57	-3.04	GDF10	growth differentiation factor 10
XM_005709717.1	6	0	2.86	2.57	GRIN3B	glutamate receptor%2C ionotropic%2C N-methyl-D-aspartate 3B
XM_005678511.1	0	0	-0.44	-1.04	LRRC41	leucine rich repeat containing 41%2C transcript variant X1
XM_005694488.1	1	0	-1.79	-1.64	KIF19	kinesin family member 19
XM_005682730.1	1	0	-1.51	-1.98	PRDM6	PR domain containing 6
XM_005698951.1	1	0	-2.97	-2.48	ZNF385D	zinc finger protein 385D
XM_005678872.1	0	0	-1.37	-2.14	LOC102168321	uncharacterized LOC102168321
XM_005695472.1	7	0	0.95	1.69	GPR132	G protein-coupled receptor 132
XR_311161.1	0	0	-1.39	-2.78	LOC102190019	uncharacterized LOC102190019
XM_005676121.1	0	0	-2.82	-4.17	GALNT13	UDP-N-acetyl-alpha-D-galactosamine:polypeptide N-acetylgalactosaminyltransferase 13 %28GalNAc-T13%29
XM_005694781.1	3	0	-0.18	-1.41	GDNF	glial cell derived neurotrophic factor
XM_005689968.1	7	0	0.92	1.44	PPME1	protein phosphatase methylesterase 1%2C transcript variant X2
XM_005688937.1	5	0	2.33	0.3	KCNQ3	potassium voltage-gated channel%2C KQT-like subfamily%2C member 3
XM_005683316.1	1	0	-3.3	-1.94	SPOCK1	sparc%2Fosteonectin%2C cwcv and kazal-like domains proteoglycan %28testican%29 1
XR_310797.1	1	0	-1.57	-1.63	LOC102189707	uncharacterized LOC102189707
XM_005699720.1	6	0	1.86	1.42	KIRREL3	kin of IRRE like 3 %28Drosophila%29
XM_005687407.1	0	0	-2.15	-3.53	LECT1	leukocyte cell derived chemotaxin 1
XM_005701011.1	2	0	-2.73	-1.02	CXHXorf23	chromosome X open reading frame%2C human CXorf23%2C transcript variant X1
XM_005697797.1	4	0	0.05	1.93	CCL24	chemokine %28C-C motif%29 ligand 24
XM_005709772.1	0	0	-0.81	-1.19	LRFN4	leucine rich repeat and fibronectin type III domain containing 4
XM_005688999.1	0	0	-0.82	-1.15	FAM110B	family with sequence similarity 110%2C member B
XR_310732.1	7	0	1.55	2.37	LOC102171269	uncharacterized LOC102171269%2C transcript variant X2
XM_005699963.1	0	0	-2.01	-3.11	RCOR2	REST corepressor 2
XM_005700718.1	3	0	0.03	-1.41	OPHN1	oligophrenin 1%2C transcript variant X1
XM_005680991.1	0	0	-0.88	-1.26	LOC102182287	histone-binding protein RBBP4-like
XM_005677536.1	0	0	-2.2	-3.25	MEX3A	mex-3 RNA binding family member A
XM_005681013.1	1	0	-1.44	-1.95	LAG3	lymphocyte-activation gene 3
XM_005689477.1	6	0	1.79	1.41	CADM1	cell adhesion molecule 1%2C transcript variant X2
XM_005697711.1	1	0	-1.19	-1.2	PHKG2	phosphorylase kinase%2C gamma 2 %28testis%29%2C transcript variant X1
XM_005688815.1	1	0	-1.16	-1.35	PTK2	protein tyrosine kinase 2%2C transcript variant X4
XM_005684076.1	1	0	-1.66	-2.01	ENHO	energy homeostasis associated
XM_005686306.1	6	0	1.14	1.03	FHL2	four and a half LIM domains 2%2C transcript variant X1
XM_005686894.1	6	0	1.37	1.67	EIF2B4	eukaryotic translation initiation factor 2B%2C subunit 4 delta%2C 67kDa%2C transcript variant X1
XM_005692465.1	6	0	2.48	2.26	DPEP2	dipeptidase 2
XM_005696474.1	6	0	2.29	2.69	RAB44	RAB44%2C member RAS oncogene family
XM_005681082.1	7	0	0.79	1.43	SUN2	Sad1 and UNC84 domain containing 2%2C transcript variant X1
XM_005688918.1	6	0	3.97	3.36	MROH6	maestro heat-like repeat family member 6
XM_005698412.1	4	0	-0.47	1.33	LOC102182376	steroid 17-alpha-hydroxylase%2F17%2C20 lyase-like
XM_005677828.1	0	0	-1.47	-2.9	NGF	nerve growth factor %28beta polypeptide%29
XM_005694710.1	5	0	4.06	1.85	ESM1	endothelial cell-specific molecule 1%2C transcript variant X1
XM_005686148.1	0	0	-1.82	-2.98	VASH1	vasohibin 1
XM_005696302.1	4	0	0.38	2.72	TREM1	triggering receptor expressed on myeloid cells 1
XM_005677419.1	0	0	-1.05	-1.45	SHC1	SHC %28Src homology 2 domain containing%29 transforming protein 1%2C transcript variant X1
XM_005683334.1	0	0	-1.84	-2.58	PCDHB14	protocadherin beta 14
XM_005697947.1	0	0	-2.23	-3.28	ABAT	4-aminobutyrate aminotransferase
XM_005678869.1	1	0	-0.95	-1.03	LOC102191103	uncharacterized LOC102191103
XM_005687387.1	6	0	2.48	2.42	ARRDC1	arrestin domain containing 1%2C transcript variant X1
XM_005680217.1	6	0	5.13	3.75	WIF1	WNT inhibitory factor 1%2C transcript variant X1
XM_005682404.1	6	0	2	2.22	STXBP2	syntaxin binding protein 2%2C transcript variant X1
XM_005679677.1	0	0	-1.88	-2.71	KCNH2	potassium voltage-gated channel%2C subfamily H %28eag-related%29%2C member 2
XM_005698922.1	0	0	-1.65	-2.94	LRRC3B	leucine rich repeat containing 3B
XR_310667.1	6	0	1.51	1.89	LOC102190448	uncharacterized LOC102190448
XM_005680669.1	7	0	1.63	2.99	CSF2RB	colony stimulating factor 2 receptor%2C beta%2C low-affinity %28granulocyte-macrophage%29%2C transcript variant X1
XM_005683352.1	0	0	-1.54	-2.22	ARSI	arylsulfatase family%2C member I
XM_005692552.1	1	0	-3.47	-3.73	HIPK4	homeodomain interacting protein kinase 4
XM_005689722.1	0	0	-1.54	-2.36	TUB	tubby bipartite transcription factor
XM_005678585.1	6	0	2.1	1.97	LOC102173632	hypoxanthine-guanine phosphoribosyltransferase-like%2C transcript variant X1
XM_005696491.1	0	0	-0.71	-1.21	FRS3	fibroblast growth factor receptor substrate 3
XM_005692853.1	6	0	0.77	1.04	IL4I1	interleukin 4 induced 1
XM_005693048.1	0	0	-1.1	-1.94	LOC102188166	uncharacterized LOC102188166
XM_005679664.1	7	0	0.42	1.02	PRKAG2	protein kinase%2C AMP-activated%2C gamma 2 non-catalytic subunit%2C transcript variant X1
XR_309903.1	2	0	-1.64	-0.49	LOC102188010	uncharacterized LOC102188010
XM_005678751.1	3	0	-0.51	-1.94	IQCA1	IQ motif containing with AAA domain 1
XM_005700169.1	0	0	-2.21	-3.15	ARMCX4	armadillo repeat containing%2C X-linked 4
XM_005678191.1	1	0	-1.49	-2.02	LPHN2	latrophilin 2%2C transcript variant X19
XM_005682313.1	7	0	2.19	3.27	PODNL1	podocan-like 1
XM_005675745.1	1	0	-3.24	-3.85	FAM3B	family with sequence similarity 3%2C member B
XM_005694936.1	0	0	-2.22	-4.73	SV2B	synaptic vesicle glycoprotein 2B
XM_005688490.1	6	0	4.03	3.48	PROCR	protein C receptor%2C endothelial%2C transcript variant X2
XM_005700639.1	1	0	-1.99	-1.83	PABPC1L2B	poly%28A%29 binding protein%2C cytoplasmic 1-like 2B
XM_005689347.1	1	0	-3.27	-4.01	GPR83	G protein-coupled receptor 83
XM_005692399.1	1	0	-1.44	-1.78	PLEKHG2	pleckstrin homology domain containing%2C family G %28with RhoGef domain%29 member 2%2C transcript variant X1
XM_005676387.1	0	0	-0.9	-1.71	CARF	calcium responsive transcription factor%2C transcript variant X1
XM_005688493.1	6	0	2.52	3.32	EIF6	eukaryotic translation initiation factor 6%2C transcript variant X3
XM_005694340.1	0	0	-1.4	-2.06	FAM171A2	family with sequence similarity 171%2C member A2
XM_005682915.1	0	0	-0.59	-1.18	LOC102191038	PWWP domain-containing protein MUM1-like%2C transcript variant X1
XM_005694833.1	1	0	-5.73	-7.51	CDH6	cadherin 6%2C type 2%2C K-cadherin %28fetal kidney%29
XM_005692817.1	0	0	-0.86	-1.31	LOC102176069	zinc finger protein 114-like
XM_005678486.1	0	0	-0.97	-1.66	GLIS1	GLIS family zinc finger 1
XM_005687371.1	0	0	-1.24	-1.78	C8G	complement component 8%2C gamma polypeptide
XM_005681446.1	1	0	-2.19	-2.01	ABCG2	ATP-binding cassette%2C sub-family G %28WHITE%29%2C member 2%2C transcript variant X1
XM_005696361.1	0	0	-1.04	-2.1	SUPT3H	suppressor of Ty 3 homolog %28S. cerevisiae%29%2C transcript variant X1
XM_005679479.1	1	0	-2.78	-3.62	MEST	mesoderm specific transcript%2C transcript variant X1
XM_005697356.1	0	0	-2.63	-6	LOC102168959	hemoglobin subunit alpha-1-like
XM_005694236.1	1	0	-1.2	-1.51	CENPV	centromere protein V
XM_005691507.1	1	0	-1.97	-1.93	RIMBP2	RIMS binding protein 2
XM_005697672.1	6	0	1.34	1.46	ALDOA	aldolase A%2C fructose-bisphosphate%2C transcript variant X2
XM_005697971.1	0	0	-0.78	-1.73	SYT17	synaptotagmin XVII
XM_005698138.1	1	0	-1.96	-2.65	PRKAR1B	protein kinase%2C cAMP-dependent%2C regulatory%2C type I%2C beta
XM_005677098.1	1	0	-2.66	-3.45	RXRG	retinoid X receptor%2C gamma%2C transcript variant X1
XM_005694025.1	1	0	-1.55	-1.99	WDR45B	WD repeat domain 45B%2C transcript variant X2
XM_005677391.1	1	0	-1.12	-1.38	PKLR	pyruvate kinase%2C liver and RBC
XM_005686525.1	1	0	-2.96	-2.57	CDKL4	cyclin-dependent kinase-like 4
XM_005683070.1	3	0	-0.31	-1.8	PCDH12	protocadherin 12%2C transcript variant X1
XM_005677931.1	1	0	-2.37	-1.94	SLC6A17	solute carrier family 6 %28neutral amino acid transporter%29%2C member 17
XM_005681425.1	1	0	-3.05	-2.92	CCSER1	coiled-coil serine-rich protein 1
XM_005683329.1	1	0	-1.17	-0.77	PCDHB6	protocadherin beta 6
XM_005693994.1	6	0	1.59	1.81	SMARCD2	SWI%2FSNF related%2C matrix associated%2C actin dependent regulator of chromatin%2C subfamily d%2C member 2%2C transcript variant X1
XM_005691824.1	1	0	-1.35	-1.67	C18H16orf46	chromosome 18 open reading frame%2C human C16orf46%2C transcript variant X1
XM_005686862.1	6	0	1.58	1.67	FOSL2	FOS-like antigen 2%2C transcript variant X1
XM_005677415.1	6	0	1.08	1.03	FLAD1	flavin adenine dinucleotide synthetase 1%2C transcript variant X2
XM_005686742.1	0	0	-1.71	-4.15	ST6GAL2	ST6 beta-galactosamide alpha-2%2C6-sialyltranferase 2
XM_005698021.1	0	0	-1.86	-3.81	STX1B	syntaxin 1B
XM_005695421.1	0	0	-1.11	-1.88	TRAF3	TNF receptor-associated factor 3%2C transcript variant X1
XM_005685034.1	0	0	-1.1	-1.73	LOC102186871	uncharacterized LOC102186871
XM_005677806.1	1	0	-1.24	-1.58	TRIM45	tripartite motif containing 45%2C transcript variant X1
XM_005694232.1	0	0	-2.17	-3.11	HS3ST3A1	heparan sulfate %28glucosamine%29 3-O-sulfotransferase 3A1
XM_005681278.1	0	0	-1.95	-2.83	NDST3	N-deacetylase%2FN-sulfotransferase %28heparan glucosaminyl%29 3
XM_005687029.1	1	0	-1.04	-1.27	KIDINS220	kinase D-interacting substrate%2C 220kDa%2C transcript variant X2
XR_310520.1	0	0	-0.78	-2.19	LOC102186609	uncharacterized LOC102186609
XM_005676687.1	0	0	-2.32	-3.85	FNDC5	fibronectin type III domain containing 5%2C transcript variant X1
XM_005689633.1	0	0	-1.19	-3.21	SCN2B	sodium channel%2C voltage-gated%2C type II%2C beta subunit
XM_005690945.1	7	0	0.77	1.75	GLUL	glutamate-ammonia ligase%2C transcript variant X2
XM_005679651.1	0	0	-0.93	-1.3	LOC102170666	uncharacterized LOC102170666
XM_005698043.1	6	0	2.06	2.47	CLDN3	claudin 3
XM_005687344.1	0	0	-1.76	-2.94	FAM69B	family with sequence similarity 69%2C member B
XM_005695045.1	1	0	-1.3	-1.17	SH3GL3	SH3-domain GRB2-like 3%2C transcript variant X1
XM_005700132.1	0	0	-0.85	-2.13	ARMCX6	armadillo repeat containing%2C X-linked 6%2C transcript variant X1
XM_005683789.1	1	0	-1.93	-1.92	PCSK5	proprotein convertase subtilisin%2Fkexin type 5%2C transcript variant X2
XM_005692859.1	4	0	0.64	3.05	NAPSA	napsin A aspartic peptidase
XM_005695661.1	0	0	-1.54	-2.28	SUSD5	sushi domain containing 5
XM_005687072.1	5	0	1.67	-1.15	OTOF	otoferlin
XM_005679649.1	0	0	-1	-2.41	SSPO	SCO-spondin
XM_005679663.1	5	0	1.11	0.12	WDR86	WD repeat domain 86
XM_005699128.1	6	0	2.51	3.2	SRGN	serglycin%2C transcript variant X1
XM_005701076.1	1	0	-2.36	-2.13	FIGF	c-fos induced growth factor %28vascular endothelial growth factor D%29
XM_005699258.1	6	0	1.61	2.14	TMEM254	transmembrane protein 254%2C transcript variant X2
XM_005691909.1	5	0	2.81	1.27	FOXL1	forkhead box L1
XM_005688408.1	0	0	-3.33	-4.62	COL20A1	collagen%2C type XX%2C alpha 1
XR_309968.1	7	0	1.23	2.57	LOC102179348	uncharacterized LOC102179348
XM_005681319.1	0	0	-4.9	-7.27	COL25A1	collagen%2C type XXV%2C alpha 1
XM_005683859.1	7	0	2.11	4.01	HRCT1	histidine rich carboxyl terminus 1
XM_005679597.1	1	0	-1.54	-1.97	LOC102175184	solute carrier family 23 member 2-like
XM_005683185.1	1	0	-2.38	-2.61	ANXA6	annexin A6%2C transcript variant X1
XM_005678794.1	6	0	1.97	1.2	FOXO6	forkhead box O6
XM_005684127.1	1	0	-1.89	-2.54	GOLM1	golgi membrane protein 1%2C transcript variant X2
XM_005693244.1	3	0	-0.53	-2.44	NOS2	nitric oxide synthase 2%2C inducible
XM_005691467.1	0	0	-1.64	-3.01	RNFT2	ring finger protein%2C transmembrane 2
XM_005676185.1	1	0	-3.15	-2.61	THSD7B	thrombospondin%2C type I%2C domain containing 7B
XM_005699050.1	0	0	-1.14	-2.26	SLC16A9	solute carrier family 16%2C member 9
XM_005688500.1	6	0	3.92	3.11	LOC102173760	fer-1-like protein 4-like
XM_005692299.1	7	0	0.8	1.17	RBM42	RNA binding motif protein 42%2C transcript variant X1
XR_309896.1	1	0	-2.68	-3.11	LOC102188008	uncharacterized LOC102188008
XM_005683895.1	0	0	-0.96	-1.66	TDRD7	tudor domain containing 7%2C transcript variant X1
XM_005690002.1	6	0	4.24	3.53	DGAT2	diacylglycerol O-acyltransferase 2%2C transcript variant X1
XM_005692027.1	1	0	-2.19	-2.29	GPR114	G protein-coupled receptor 114
XM_005685168.1	1	0	-3.59	-4.06	THSD4	thrombospondin%2C type I%2C domain containing 4%2C transcript variant X2
XM_005692663.1	4	0	0.13	1.12	C5AR1	complement component 5a receptor 1
XM_005677645.1	1	0	-1.31	-1.01	SETDB1	SET domain%2C bifurcated 1%2C transcript variant X2
XM_005693589.1	0	0	-1.05	-1.54	TEKT3	tektin 3
XM_005682182.1	0	0	-1.59	-2.34	RAB3A	RAB3A%2C member RAS oncogene family
XR_310507.1	1	0	-1.08	-1.46	LOC102189880	uncharacterized LOC102189880%2C transcript variant X2
XM_005683212.1	1	0	-1.11	-1.1	CNOT8	CCR4-NOT transcription complex%2C subunit 8%2C transcript variant X1
XM_005687510.1	0	0	-2.25	-3.18	DCLK1	doublecortin-like kinase 1%2C transcript variant X1
XM_005681124.1	0	0	-2.64	-3.93	2015-09-03	septin 3
XM_005700848.1	1	0	-2.2	-2.56	ZNF157	zinc finger protein 157
XM_005700728.1	0	0	-1.36	-2.25	NUDT11	nudix %28nucleoside diphosphate linked moiety X%29-type motif 11
XM_005687825.1	1	0	-2.43	-2.55	LOC102186409	60S ribosomal protein L17-like
XM_005692129.1	3	0	-0.06	-1.25	EXOC3L1	exocyst complex component 3-like 1
XM_005692968.1	0	0	-1.93	-3.19	BRSK1	BR serine%2Fthreonine kinase 1
XM_005697670.1	0	0	-1.51	-2.18	TBX6	T-box 6
XM_005697904.1	0	0	-0.6	-1.15	RNF216	ring finger protein 216%2C transcript variant X1
XM_005696013.1	1	0	-1.66	-1.26	LOC102171384	serine%2Farginine repetitive matrix protein 2-like%2C transcript variant X3
XM_005700861.1	0	0	-0.77	-1.55	ARHGEF9	Cdc42 guanine nucleotide exchange factor %28GEF%29 9%2C transcript variant X2
XM_005698382.1	1	0	-1.97	-2.55	LOC102172322	coiled-coil and C2 domain-containing protein 2A-like
XM_005693787.1	7	0	1.27	1.81	KRT24	keratin 24
XM_005695702.1	0	0	-2.39	-4.54	SRGAP3	SLIT-ROBO Rho GTPase activating protein 3
XR_311101.1	0	0	-1.93	-3.49	LOC102190928	uncharacterized LOC102190928
XM_005701084.1	1	0	-2.48	-3.28	ASB9	ankyrin repeat and SOCS box containing 9
XM_005693560.1	6	0	2.76	3.42	NDEL1	nudE neurodevelopment protein 1-like 1%2C transcript variant X2
XM_005689855.1	7	0	1.19	1.65	STIM1	stromal interaction molecule 1%2C transcript variant X2
XM_005675647.1	6	0	1.81	1.82	CBS	cystathionine-beta-synthase%2C transcript variant X3
XM_005701122.1	0	0	-1.23	-1.84	MID1	midline 1 %28Opitz%2FBBB syndrome%29%2C transcript variant X1
XM_005675841.1	0	0	-2.73	-4.37	GPR17	G protein-coupled receptor 17
XM_005682380.1	6	0	1.24	0.96	TMEM205	transmembrane protein 205%2C transcript variant X1
XM_005700005.1	0	0	-1.74	-2.57	CNIH2	cornichon family AMPA receptor auxiliary protein 2
XM_005700896.1	0	0	-1.95	-3.12	LOC100860788	melanoma-associated antigen-like protein%2C transcript variant X1
XR_310727.1	1	0	-2.68	-1.56	LOC102187074	uncharacterized LOC102187074
XM_005699171.1	1	0	-1.27	-0.89	ASCC1	activating signal cointegrator 1 complex subunit 1%2C transcript variant X1
XM_005686056.1	1	0	-1.97	-2.66	PNMA1	paraneoplastic Ma antigen 1
XM_005687074.1	0	0	-1.31	-2.28	GAREML	GRB2 associated%2C regulator of MAPK1-like
XM_005709766.1	0	0	-0.85	-3.13	CACNA1A	calcium channel%2C voltage-dependent%2C P%2FQ type%2C alpha 1A subunit
XM_005699936.1	1	0	-0.91	-1.22	RBM4B	RNA binding motif protein 4B%2C transcript variant X1
XM_005699139.1	0	0	-1.3	-2.62	LOC102191766	core histone macro-H2A.2-like%2C transcript variant X1
XM_005701104.1	7	0	0.47	1.43	TRAPPC2	trafficking protein particle complex 2%2C transcript variant X2
XM_005699414.1	1	0	-3.88	-5.24	FAT3	FAT atypical cadherin 3
XM_005682345.1	0	0	-2.13	-4.05	LOC102178814	noelin-2-like
XM_005676617.1	3	0	-0.57	-2.43	FAM124B	family with sequence similarity 124B
XM_005699724.1	1	0	-2.1	-2.74	NTM	neurotrimin
XM_005694280.1	0	0	-0.74	-1.42	HOXB5	homeobox B5
XM_005693724.1	3	0	-0.17	-1	PCGF2	polycomb group ring finger 2%2C transcript variant X2
XM_005676477.1	6	0	3.2	3.18	FZD5	frizzled family receptor 5
XM_005676586.1	1	0	-1.39	-0.97	PTPRN	protein tyrosine phosphatase%2C receptor type%2C N
XM_005688158.1	0	0	-3.79	-6.28	PRND	prion protein 2 %28dublet%29
XM_005682564.1	1	0	-3.06	-4.12	EBI3	Epstein-Barr virus induced 3
XM_005685167.1	1	0	-2.88	-3.89	THSD4	thrombospondin%2C type I%2C domain containing 4%2C transcript variant X1
XM_005681034.1	3	0	0.35	-1.71	NRIP2	nuclear receptor interacting protein 2
XM_005682195.1	0	0	-1.35	-2.3	FAM129C	family with sequence similarity 129%2C member C
XM_005687163.1	0	0	-0.75	-2.45	SH2D3C	SH2 domain containing 3C%2C transcript variant X1
XM_005695525.1	0	0	-0.8	-1.17	LOC102178950	transmembrane protein with metallophosphoesterase domain-like
XM_005681704.1	1	0	-2.72	-2.49	KIAA1211	KIAA1211 ortholog
XM_005684126.1	1	0	-2.2	-1.87	GOLM1	golgi membrane protein 1%2C transcript variant X1
XM_005679117.1	1	0	-1.6	-1.49	LOC102170111	EF-hand calcium-binding domain-containing protein 10-like
XM_005690012.1	7	0	0.62	1.81	LRRC32	leucine rich repeat containing 32%2C transcript variant X2
XM_005699814.1	1	0	-5.22	-6.36	VWCE	von Willebrand factor C and EGF domains
XM_005679444.1	1	0	-1.93	-1.47	CALU	calumenin%2C transcript variant X4
XM_005688990.1	0	0	-2.75	-3.79	PLAG1	pleiomorphic adenoma gene 1%2C transcript variant X1
XM_005697079.1	0	0	-1.84	-3.24	DLGAP1	discs%2C large %28Drosophila%29 homolog-associated protein 1
XM_005688401.1	3	0	0.04	-1.14	ZBTB46	zinc finger and BTB domain containing 46
XM_005678311.1	1	0	-2.04	-2.13	CACHD1	cache domain containing 1%2C transcript variant X1
XM_005689459.1	0	0	-1.53	-2.67	NCAM1	neural cell adhesion molecule 1%2C transcript variant X2
XM_005676244.1	0	0	-1.36	-3.01	LYPD1	LY6%2FPLAUR domain containing 1
XM_005686411.1	0	0	-2.71	-4.48	LOC102171434	two pore calcium channel protein 1-like
XM_005692237.1	1	0	-2.91	-3.62	ZNF536	zinc finger protein 536
XM_005695759.1	1	0	-1.73	-2.13	ADAMTS9	ADAM metallopeptidase with thrombospondin type 1 motif%2C 9%2C transcript variant X1
XM_005696366.1	0	0	-0.66	-1.89	RCAN2	regulator of calcineurin 2%2C transcript variant X1
XR_310106.1	0	0	-1.38	-1.94	LOC102171230	uncharacterized LOC102171230
XM_005692102.1	3	0	-0.35	-1.35	CDH5	cadherin 5%2C type 2 %28vascular endothelium%29%2C transcript variant X2
XM_005688933.1	1	0	-4.34	-4.26	COL22A1	collagen%2C type XXII%2C alpha 1
XM_005697059.1	0	0	-1.24	-1.85	LOC102170746	profilin-2-like
XM_005700539.1	0	0	-1.76	-2.8	SPRY3	sprouty homolog 3 %28Drosophila%29
XM_005693757.1	6	0	2.74	3.07	GRB7	growth factor receptor-bound protein 7%2C transcript variant X3
XM_005695389.1	3	0	0.4	-1.6	CHGA	chromogranin A %28parathyroid secretory protein 1%29
XM_005693548.1	1	0	-1.04	-1.27	AURKB	aurora kinase B%2C transcript variant X1
XM_005684747.1	1	0	-1.24	-1.57	EPB41L2	erythrocyte membrane protein band 4.1-like 2%2C transcript variant X5
XM_005690911.1	1	0	-2.32	-2.66	PAPPA2	pappalysin 2
XM_005692522.1	1	0	-3.32	-4.37	DPF1	D4%2C zinc and double PHD fingers family 1
XM_005676611.1	1	0	-1.78	-2.07	KCNE4	potassium voltage-gated channel%2C Isk-related family%2C member 4
XM_005679989.1	6	0	1.75	1.66	FMNL3	formin-like 3%2C transcript variant X5
XM_005696044.1	6	0	1.56	1.8	CXCR6	chemokine %28C-X-C motif%29 receptor 6
XM_005683325.1	0	0	-0.88	-2.08	LOC102187129	protocadherin alpha-1-like
XM_005697817.1	1	0	-1.04	-0.92	SRRT	serrate RNA effector molecule homolog %28Arabidopsis%29%2C transcript variant X2
XM_005680011.1	3	0	0.01	-1.69	FKBP11	FK506 binding protein 11%2C 19 kDa%2C transcript variant X3
XM_005683302.1	5	0	1.43	0.25	PLK5	polo-like kinase 5
XM_005683214.1	1	0	-1.58	-1.64	GEMIN5	gem %28nuclear organelle%29 associated protein 5%2C transcript variant X1
XM_005678729.1	6	0	3.57	4.02	GJB5	gap junction protein%2C beta 5%2C 31.1kDa%2C transcript variant X1
XM_005696639.1	6	0	1.88	2.22	RNF39	ring finger protein 39%2C transcript variant X2
XM_005680298.1	3	0	-0.41	-1.85	R3HDM2	R3H domain containing 2%2C transcript variant X10
XM_005698298.1	6	0	2.26	2.45	HOGA1	4-hydroxy-2-oxoglutarate aldolase 1%2C transcript variant X1
XM_005692507.1	0	0	-1.14	-1.76	C18H19orf55	chromosome 18 open reading frame%2C human C19orf55
XM_005677541.1	3	0	-0.87	-3.88	TRIM46	tripartite motif containing 46
XM_005690198.1	6	0	5.4	3.78	ALX4	ALX homeobox 4
XM_005697187.1	6	0	1.7	1.57	SMAD7	SMAD family member 7%2C transcript variant X2
XM_005693728.1	1	0	-1.44	-1.44	PIP4K2B	phosphatidylinositol-5-phosphate 4-kinase%2C type II%2C beta%2C transcript variant X1
XM_005695906.1	6	0	2.35	2.51	GRM2	glutamate receptor%2C metabotropic 2
XM_005680035.1	6	0	3.93	4.42	ENDOU	endonuclease%2C polyU-specific%2C transcript variant X1
XM_005709732.1	0	0	-0.66	-1.29	CHRNB4	cholinergic receptor%2C nicotinic%2C beta 4 %28neuronal%29
XM_005679978.1	1	0	-1.33	-1.5	RACGAP1	Rac GTPase activating protein 1%2C transcript variant X1
XM_005684923.1	1	0	-1.99	-2.04	FBXO5	F-box protein 5%2C transcript variant X1
XR_309924.1	6	0	1.51	1.48	LOC102188465	POU domain%2C class 3%2C transcription factor 3-like
XM_005677641.1	6	0	2.44	2.23	FAM63A	family with sequence similarity 63%2C member A%2C transcript variant X3
XM_005688921.1	3	0	-0.06	-1.26	GPIHBP1	glycosylphosphatidylinositol anchored high density lipoprotein binding protein 1
XR_310780.1	1	0	-2.78	-1.92	PHF12	PHD finger protein 12%2C transcript variant X2
XM_005691083.1	1	0	-4.78	-6.49	ASTN1	astrotactin 1
XM_005689464.1	0	0	-1.25	-1.96	ZW10	zw10 kinetochore protein%2C transcript variant X2
XM_005674778.1	1	0	-2.53	-2.72	ROBO2	roundabout%2C axon guidance receptor%2C homolog 2 %28Drosophila%29%2C transcript variant X3
XM_005694572.1	0	0	-1.93	-2.77	MAP1B	microtubule-associated protein 1B%2C transcript variant X3
XM_005699976.1	1	0	-1.66	-2.13	NRXN2	neurexin 2
XM_005697857.1	0	0	-0.32	-1	LOC102190090	zinc finger protein 135-like%2C transcript variant X1
XM_005689838.1	1	0	-2.89	-3.33	LOC102184170	olfactory receptor 51E1-like
XM_005682353.1	7	0	0.88	1.47	ICAM1	intercellular adhesion molecule 1%2C transcript variant X1
XM_005696626.1	1	0	-1.47	-1.98	NRM	nurim %28nuclear envelope membrane protein%29%2C transcript variant X3
XM_005688848.1	1	0	-2.73	-3.14	NSMCE2	non-SMC element 2%2C MMS21 homolog %28S. cerevisiae%29%2C transcript variant X1
XM_005690435.1	0	0	-1.93	-2.73	CNTN2	contactin 2 %28axonal%29
XM_005676220.1	0	0	-2.28	-3.3	HOXD3	homeobox D3
XM_005701120.1	0	0	-1.72	-4.21	EGFL6	EGF-like-domain%2C multiple 6
XM_005690855.1	0	0	-0.99	-2.23	TMEM240	transmembrane protein 240
XM_005681858.1	1	0	-3.33	-2.03	ARHGAP24	Rho GTPase activating protein 24%2C transcript variant X4
XM_005700988.1	0	0	-2.29	-3.56	PCYT1B	phosphate cytidylyltransferase 1%2C choline%2C beta%2C transcript variant X3
XM_005693779.1	0	0	-0.87	-1.71	RARA	retinoic acid receptor%2C alpha%2C transcript variant X3
XM_005674951.1	1	0	-1.5	-1.91	B4GALT4	UDP-Gal:betaGlcNAc beta 1%2C4- galactosyltransferase%2C polypeptide 4%2C transcript variant X1
XR_310105.1	7	0	1.21	1.67	LOC102189570	uncharacterized LOC102189570
XM_005693694.1	6	0	1.54	1.02	GNGT2	guanine nucleotide binding protein %28G protein%29%2C gamma transducing activity polypeptide 2%2C transcript variant X2
XM_005678592.1	3	0	0.11	-1.72	ZNF691	zinc finger protein 691%2C transcript variant X2
XM_005689728.1	6	0	2.36	2.38	PPFIBP2	PTPRF interacting protein%2C binding protein 2 %28liprin beta 2%29%2C transcript variant X3
XM_005682931.1	0	0	-1.75	-3.01	FSTL4	follistatin-like 4
XM_005696309.1	6	0	2.03	1.63	GUCA1A	guanylate cyclase activator 1A %28retina%29
XM_005695261.1	0	0	-2.92	-4.6	NPAS3	neuronal PAS domain protein 3
XM_005681381.1	1	0	-1.42	-1.3	TRMT10A	tRNA methyltransferase 10 homolog A %28S. cerevisiae%29%2C transcript variant X2
XM_005698567.1	1	0	-1.45	-1.56	PLEKHA1	pleckstrin homology domain containing%2C family A %28phosphoinositide binding specific%29 member 1%2C transcript variant X3
XM_005691549.1	0	0	-0.93	-1.3	TRAFD1	TRAF-type zinc finger domain containing 1%2C transcript variant X1
XM_005681847.1	1	0	-3.4	-2.41	LOC102178994	placenta-specific gene 8 protein-like
XM_005685460.1	0	0	-4.18	-6.15	SCG5	secretogranin V %287B2 protein%29%2C transcript variant X2
XM_005688540.1	0	0	-0.91	-2.24	NNAT	neuronatin%2C transcript variant X1
XM_005691309.1	1	0	-2.41	-1.92	PDGFC	platelet derived growth factor C%2C transcript variant X1
XM_005676882.1	0	0	-0.8	-2.01	EPHB2	EPH receptor B2%2C transcript variant X2
XM_005684346.1	0	0	-0.96	-2.66	C8H9orf91	chromosome 8 open reading frame%2C human C9orf91%2C transcript variant X1
XM_005691791.1	0	0	-0.47	-1.56	RFWD3	ring finger and WD repeat domain 3%2C transcript variant X1
XM_005696708.1	0	0	-0.92	-2.5	ZKSCAN4	zinc finger with KRAB and SCAN domains 4%2C transcript variant X1
XM_005699280.1	4	0	0.13	1.25	SH2D4B	SH2 domain containing 4B
XM_005694231.1	1	0	-1.75	-1.62	ARHGAP44	Rho GTPase activating protein 44
XM_005709474.1	3	0	0.12	-2.09	ADCY8	adenylate cyclase 8 %28brain%29
XM_005692824.1	6	0	1.61	1.57	FAM83E	family with sequence similarity 83%2C member E
XM_005709684.1	1	0	-2.26	-1.24	DLGAP3	discs%2C large %28Drosophila%29 homolog-associated protein 3
XM_005691992.1	7	0	0.4	1.36	GNAO1	guanine nucleotide binding protein %28G protein%29%2C alpha activating activity polypeptide O%2C transcript variant X1
XM_005697782.1	6	0	2.56	3.26	ELN	elastin%2C transcript variant X1
XM_005681960.1	1	0	-3.12	-4.03	STK32B	serine%2Fthreonine kinase 32B
XR_310102.1	6	0	2.08	2	LOC102177046	uncharacterized LOC102177046
XM_005693461.1	0	0	-0.57	-1.11	PLD2	phospholipase D2%2C transcript variant X1
XM_005676410.1	6	0	1.05	1.17	NRP2	neuropilin 2%2C transcript variant X5
XM_005695830.1	0	0	-0.84	-2.63	ARHGEF3	Rho guanine nucleotide exchange factor %28GEF%29 3%2C transcript variant X3
XM_005680541.1	0	0	-5.74	-10.18	STAB2	stabilin 2
XM_005693632.1	7	0	2.13	3.37	MAP2K3	mitogen-activated protein kinase kinase 3%2C transcript variant X2
XM_005676447.1	1	0	-1.78	-1.51	PIKFYVE	phosphoinositide kinase%2C FYVE finger containing%2C transcript variant X1
XM_005686295.1	1	0	-2.03	-1.42	IL1R1	interleukin 1 receptor%2C type I%2C transcript variant X2
XM_005683186.1	0	0	-2.04	-3.17	ANXA6	annexin A6%2C transcript variant X2
XM_005693909.1	6	0	1.73	2.23	CD300LG	CD300 molecule-like family member g%2C transcript variant X3
XM_005683056.1	1	0	-2.14	-1.48	PCDHB7	protocadherin beta 7
XM_005676168.1	1	0	-3.61	-4.51	KIF5C	kinesin family member 5C
XM_005697355.1	0	0	-2.76	-6.73	LOC102168680	hemoglobin subunit alpha-2-like
XM_005682098.1	0	0	-1.03	-1.44	SUGP2	SURP and G patch domain containing 2%2C transcript variant X2
XM_005693651.1	1	0	-4.37	-4.88	WFIKKN2	WAP%2C follistatin%2Fkazal%2C immunoglobulin%2C kunitz and netrin domain containing 2
XM_005676688.1	0	0	-2.69	-4.22	FNDC5	fibronectin type III domain containing 5%2C transcript variant X2
XM_005698084.1	1	0	-2.27	-2.55	GPC2	glypican 2
XM_005693432.1	0	0	-1.64	-2.38	FAM64A	family with sequence similarity 64%2C member A%2C transcript variant X2
XM_005691984.1	0	0	-1.22	-1.88	FTO	fat mass and obesity associated%2C transcript variant X2
XM_005690894.1	1	0	-1.9	-1.73	CENPL	centromere protein L%2C transcript variant X2
XM_005679772.1	0	0	-0.62	-2.08	METTL25	methyltransferase like 25%2C transcript variant X1
XM_005697941.1	6	0	1.93	1.41	C25H16orf89	chromosome 25 open reading frame%2C human C16orf89
XM_005682770.1	1	0	-1.51	-1.83	B4GALT7	xylosylprotein beta 1%2C4-galactosyltransferase%2C polypeptide 7%2C transcript variant X2
XM_005698698.1	0	0	-2.24	-5.05	XKR5	XK%2C Kell blood group complex subunit-related family%2C member 5
XM_005691512.1	0	0	-1.83	-4.45	TMEM132B	transmembrane protein 132B
XM_005695576.1	3	0	0.53	-1.35	CCK	cholecystokinin
XM_005681956.1	2	0	-9.78	-2.02	HPSE	heparanase
XM_005677741.1	0	0	-0.69	-1.37	PIAS3	protein inhibitor of activated STAT%2C 3%2C transcript variant X1
XM_005685810.1	1	0	-2.67	-3.11	SEMA6D	sema domain%2C transmembrane domain %28TM%29%2C and cytoplasmic domain%2C %28semaphorin%29 6D%2C transcript variant X1
XM_005688377.1	1	0	-1.51	-1.97	C13H20orf112	chromosome 13 open reading frame%2C human C20orf112%2C transcript variant X1
XM_005676231.1	0	0	-2.95	-4.75	LOC102189805	transcription factor Sp8-like
XM_005682794.1	0	0	-1.22	-1.68	ZNF496	zinc finger protein 496%2C transcript variant X1
XM_005679870.1	0	0	-0.99	-1.59	ATP5G2	ATP synthase%2C H%2B transporting%2C mitochondrial Fo complex%2C subunit C2 %28subunit 9%29%2C transcript variant X2
XM_005688625.1	0	0	-1.14	-2.07	ELMO2	engulfment and cell motility 2%2C transcript variant X2
XM_005696300.1	1	0	-4.87	-3.89	TREM2	triggering receptor expressed on myeloid cells 2
XM_005679297.1	0	0	-3.8	-6.64	ADAM22	ADAM metallopeptidase domain 22%2C transcript variant X2
XM_005688252.1	1	0	-2.19	-2.07	OPRL1	opiate receptor-like 1
XM_005698035.1	1	0	-3.18	-1.87	NCF1	neutrophil cytosolic factor 1
XM_005682450.1	1	0	-3.9	-5.13	ANGPTL6	angiopoietin-like 6
XM_005693147.1	6	0	1.1	0.84	USP32	ubiquitin specific peptidase 32%2C transcript variant X2
XM_005691104.1	1	0	-1.79	-1.65	CAMK1G	calcium%2Fcalmodulin-dependent protein kinase IG
XM_005695046.1	3	0	-0.77	-3.23	SH3GL3	SH3-domain GRB2-like 3%2C transcript variant X2
XM_005709410.1	0	0	-1.42	-2.4	PCDHA4	protocadherin alpha 4
XM_005686895.1	6	0	2.47	2.67	EIF2B4	eukaryotic translation initiation factor 2B%2C subunit 4 delta%2C 67kDa%2C transcript variant X2
XM_005688200.1	0	0	-0.89	-1.78	HSPA12B	heat shock 70kD protein 12B%2C transcript variant X2
XM_005694403.1	1	0	-2.92	-2.1	NPTX1	neuronal pentraxin I
XM_005682129.1	2	0	-1.74	-0.7	BABAM1	BRISC and BRCA1 A complex member 1%2C transcript variant X3
XM_005676259.1	0	0	-1.65	-2.39	EPB41L5	erythrocyte membrane protein band 4.1 like 5%2C transcript variant X1
XM_005697562.1	3	0	-0.52	-2.08	THUMPD1	THUMP domain containing 1%2C transcript variant X1
XR_310924.1	1	0	-3.47	-4.64	LOC102168212	uncharacterized LOC102168212
XM_005690032.1	0	0	-2.02	-3	MPPED2	metallophosphoesterase domain containing 2%2C transcript variant X1
XM_005675512.1	1	0	-1.81	-2.3	MRAS	muscle RAS oncogene homolog%2C transcript variant X1
XM_005685233.1	6	0	1.56	1.98	DCAF11	DDB1 and CUL4 associated factor 11%2C transcript variant X3
XM_005680277.1	0	0	-1.58	-2.58	ARHGEF25	Rho guanine nucleotide exchange factor %28GEF%29 25%2C transcript variant X1
XM_005692739.1	0	0	-1.17	-3.48	SPIB	Spi-B transcription factor %28Spi-1%2FPU.1 related%29%2C transcript variant X1
XM_005681267.1	1	0	-1.98	-2.44	PDE5A	phosphodiesterase 5A%2C cGMP-specific%2C transcript variant X1
XM_005678896.1	0	0	-1.11	-2.53	UPP1	uridine phosphorylase 1
XM_005689002.1	0	0	-0.8	-1.13	SDCBP	syndecan binding protein %28syntenin%29%2C transcript variant X2
XM_005687097.1	0	0	-2.85	-4.55	SOX11	SRY %28sex determining region Y%29-box 11
XM_005677139.1	3	0	-0.24	-1.15	OLFML2B	olfactomedin-like 2B%2C transcript variant X3
XM_005679623.1	1	0	-2.3	-2.77	FAM131B	family with sequence similarity 131%2C member B
XM_005688117.1	0	0	-1.96	-4.21	PAX1	paired box 1
XR_309855.1	2	0	-1.51	-0.62	LOC102184485	uncharacterized LOC102184485
XM_005697563.1	1	0	-2.1	-1.31	THUMPD1	THUMP domain containing 1%2C transcript variant X2
XM_005676707.1	6	0	2.78	2.11	FAM167B	family with sequence similarity 167%2C member B%2C transcript variant X2
XR_311070.1	0	0	-3.8	-7.03	LOC102187550	uncharacterized LOC102187550
XM_005677875.1	0	0	-0.29	-1.02	RHOC	ras homolog family member C%2C transcript variant X1
XM_005691440.1	1	0	-1.71	-1.09	HVCN1	hydrogen voltage-gated channel 1%2C transcript variant X1
XM_005688823.1	1	0	-1.74	-2.16	ST3GAL1	ST3 beta-galactoside alpha-2%2C3-sialyltransferase 1%2C transcript variant X1
XM_005684794.1	1	0	-2.77	-2.48	PDE7B	phosphodiesterase 7B%2C transcript variant X2
XM_005688541.1	0	0	-1.69	-3.75	NNAT	neuronatin%2C transcript variant X2
XM_005685105.1	1	0	-2.06	-1.63	CILP	cartilage intermediate layer protein%2C nucleotide pyrophosphohydrolase%2C transcript variant X3
XM_005675493.1	5	0	1.65	0.61	RNF7	ring finger protein 7%2C transcript variant X3
XM_005696367.1	1	0	-3.41	-2.47	RCAN2	regulator of calcineurin 2%2C transcript variant X2
XM_005699484.1	1	0	-0.99	-1.32	PRCP	prolylcarboxypeptidase %28angiotensinase C%29%2C transcript variant X2
XM_005684550.1	0	0	-1.54	-2.44	LAMA4	laminin%2C alpha 4%2C transcript variant X1
XM_005679856.1	0	0	-2.87	-6.27	CBX5	chromobox homolog 5%2C transcript variant X4
XM_005688824.1	0	0	-1.92	-3.03	ST3GAL1	ST3 beta-galactoside alpha-2%2C3-sialyltransferase 1%2C transcript variant X2
XM_005699723.1	0	0	-2.78	-6.02	IGSF9B	immunoglobulin superfamily%2C member 9B
XM_005691723.1	0	0	-0.9	-1.47	MTFP1	mitochondrial fission process 1
XR_310936.1	2	0	-1.62	0	LOC102168308	uncharacterized LOC102168308%2C transcript variant X3
XM_005691469.1	0	0	-1.7	-3.89	TBX5	T-box 5
XM_005676810.1	6	0	1.22	1.17	RPS6KA1	ribosomal protein S6 kinase%2C 90kDa%2C polypeptide 1%2C transcript variant X3
XM_005690104.1	1	0	-2.15	-2.47	MYO7A	myosin VIIA
XM_005693729.1	1	0	-2.19	-1.48	PIP4K2B	phosphatidylinositol-5-phosphate 4-kinase%2C type II%2C beta%2C transcript variant X2
XM_005676706.1	6	0	2.83	1.88	FAM167B	family with sequence similarity 167%2C member B%2C transcript variant X1
XM_005684395.1	0	0	-2.1	-3.17	LOC102173847	uncharacterized LOC102173847
XM_005709383.1	0	0	-1.97	-3.8	HOXD1	homeobox D1
XM_005683549.1	3	0	-0.73	-3.08	PNOC	prepronociceptin%2C transcript variant X2
XM_005675041.1	6	0	2.63	2.39	MYLK	myosin light chain kinase%2C transcript variant X3
XM_005683843.1	0	0	-1.97	-3.72	TPM2	tropomyosin 2 %28beta%29%2C transcript variant X3
XM_005692309.1	6	0	4.32	5.17	DMKN	dermokine%2C transcript variant X1
XM_005694346.1	1	0	-1.55	-1.72	C1QL1	complement component 1%2C q subcomponent-like 1
XM_005697100.1	0	0	-2.59	-4.57	ASXL3	additional sex combs like 3 %28Drosophila%29
XM_005675756.1	6	0	2.69	2.6	SLC37A1	solute carrier family 37 %28glucose-6-phosphate transporter%29%2C member 1
XM_005681217.1	0	0	-0.91	-1.66	FAM118A	family with sequence similarity 118%2C member A%2C transcript variant X1
XM_005681894.1	1	0	-3.21	-3.33	CYTL1	cytokine-like 1
XM_005689460.1	0	0	-1.56	-2.97	NCAM1	neural cell adhesion molecule 1%2C transcript variant X3
XM_005694895.1	1	0	-2.25	-2.17	AHRR	aryl-hydrocarbon receptor repressor
XM_005679606.1	1	0	-2.3	-3.09	CLEC2L	C-type lectin domain family 2%2C member L
XM_005680608.1	0	0	-1.48	-2.02	RBFOX2	RNA binding protein%2C fox-1 homolog %28C. elegans%29 2%2C transcript variant X3
XM_005695069.1	0	0	-1.66	-3.92	ARNT2	aryl-hydrocarbon receptor nuclear translocator 2%2C transcript variant X3
XM_005678851.1	1	0	-1.33	-1.76	ANKMY1	ankyrin repeat and MYND domain containing 1
XM_005681428.1	1	0	-2.14	-2.2	SNCA	synuclein%2C alpha %28non A4 component of amyloid precursor%29%2C transcript variant X1
XM_005696162.1	6	0	2.1	1.22	EFCC1	EF-hand and coiled-coil domain containing 1
XM_005691093.1	0	0	-2.45	-3.85	CACNA1E	calcium channel%2C voltage-dependent%2C R type%2C alpha 1E subunit
[truncated: 62 more rows]
